# Supplementary material for: Co-expression clustering across flower development identifies modules for diverse floral forms in Achimenes (Gesneriaceae)
Source: bioRxiv preprint, doi:10.1101/817221, version 2 (2020-02-13)
Supplement: Supplemental Tables [file 817221_file02.xlsx]

## Sheet: 1. Sequencing and assembly
Species	Abbreviation	Total Reads	Trinity Transcripts	Trinity Genes	Mean Length (bp)	N50 (bp)	Assembly Length (bp)	Transcripts after CDHIT	Genes after CDHIT	TransDecoder CDS	TransDecoder Genes	CDS Mean Length (bp)	CDS N50 (bp)	CDS Length (bp)	GC (%)	BUSCO completeness
Achimenes admirabilis	AA	196945922	189409	108895	1479	2656	280092368	180005	103687	61635	32349	916	1185	56478429	42.02	C: 90.1% [S: 69.7%, D: 20.4%], F: 7.7%, M: 2.2%, n: 1375
Achimenes antirrhina	AT	222145374	210743	107153	1144	1942	241070165	198292	101244	58905	25718	892	1134	52514259	42.33	C: 86.2% [S: 65.0%, D: 21.2%], F: 10.8%, M: 3.0%, n: 1375
Achimenes candida	AD	202489062	279290	133698	1101	1845	307402005	269780	128378	81095	26392	882	1095	71486718	42.42	C: 84.4% [S: 39.8%, D: 44.6%], F: 12.7%, M: 2.9%, n: 1375
Achimenes cettoana	AC	181224222	172243	102858	1281	2290	220581789	162676	96993	48185	23885	984	1275	47408874	42.37	C: 94.0% [S: 73.7%, D: 20.3%], F: 3.9%, M: 2.1%, n: 1375
Achimenes erecta	AE	201109150	307985	161257	1024	1770	315216736	295432	153986	83550	33501	826	1023	68977014	42.52	C: 83.9% [S: 49.1%, D: 34.8%], F: 12.6%, M: 3.5%, n: 1375
Achimenes grandiflora	AG	237157798	203507	118602	1247	2257	253775925	191702	111362	56058	26735	911	1167	51085377	42.34	C: 88.7% [S: 66.9%, D: 21.8%], F: 8.8%, M: 2.5%, n: 1375
Achimenes longiflora	AL	223336484	184943	95593	1291	2247	238783592	172416	88702	52891	23230	932	1194	49305486	42.29	C: 87.0% [S: 64.9%, D: 22.1%], F: 10.0%, M: 3.0%, n: 1375
Achimenes misera	AM	230604822	286312	144937	1063	1811	304247486	275817	138948	80190	27302	880	1098	70549512	42.42	C: 87.4% [S: 39.9%, D: 47.5%], F: 9.9%, M: 2.7%, n: 1375
Achimenes patens 'Major'	AP	213961030	268406	146104	946	1644	253777307	254281	137943	67726	29136	835	1044	56526909	42.35	C: 85.9% [S: 59.1%, D: 26.8%], F: 10.4%, M: 3.7%, n: 1375
Achimenes pedunculata	AN	193913824	249593	148924	995	1785	248425003	236241	140465	66954	31613	839	1044	56199174	42.35	C: 85.9% [S: 62.0%, D: 23.9%], F: 11.2%, M: 2.9%, n: 1375
Eucodonia verticillata	EV	256519000	173298	95791	1265	2197	219195858	162500	89670	48942	22942	959	1233	46915635	42.38	C: 89.1% [S: 70.5%, D: 18.6%], F: 7.9%, M: 3.0%, n: 1375
Gesneria cuneifolia	GC	168832940	223051	111562	1120	1904	249758344	210980	105851	64878	26323	870	1092	56432931	42.66	C: 84.4% [S: 58.4%, D: 26.0%], F: 12.1%, M: 3.5%, n: 1375

## Sheet: 2. Orthogroup metrics
Orthogroup	Bud.modules	D.modules	hubs.bud	hubs.d	connTotal.Bud	connWithin.Bud	connOut.Bud	connDiff.Bud	connTotal.D	connWithin.D	connOut.D	connDiff.D	Omega	avgExpr.Bud	avgExpr.D	Uniprot	Protein.names	Gene.ontology..biological.process.	Gene.ontology..cellular.component.	Gene.ontology..molecular.function.	periphery.bud.list	periphery.d.list	syndrome.bud	syndrome.d	syndrome.bud2	syndrome.d2
cluster1_1rr.inclade2.ortho2.tre	ME13	ME6	FALSE	FALSE	10.2467	2.44209	7.80464	-5.36255	5.20894	0.930238	4.2787	-3.34846	0.35632	0.053104	0.0059068	NA	NA	NA	NA	NA	FALSE	FALSE	HUMMINGBIRD	HUMMINGBIRD	HUMMINGBIRD	HUMMINGBIRD
cluster1_1rr.inclade4.ortho2.tre	ME0	ME25	FALSE	FALSE	3.87813	1.17289	2.70523	-1.53234	12.4148	2.73399	9.68084	-6.94686	0.46492	0.0391314	-0.0383977	NA	NA	NA	NA	NA	FALSE	FALSE	0	0	0	0
cluster1_2rr.inclade2.ortho3.tre	ME0	ME25	FALSE	FALSE	9.25076	1.24914	8.00161	-6.75247	24.5813	4.86595	19.7154	-14.8494	0.37503	0.0633499	-0.0270778	M820_ARATH	Uncharacterized mitochondrial protein AtMg00820 (ORF170)		mitochondrion [GO:0005739]		FALSE	FALSE	0	0	0	0
cluster1_3rr.inclade1.ortho9.tre	ME33	ME30	TRUE	FALSE	15.1814	5.36813	9.81331	-4.44518	29.8151	9.17638	20.6387	-11.4623	0.62612	0.0184314	0.0468071	M810_ARATH	Uncharacterized mitochondrial protein AtMg00810 (ORF240b)		mitochondrion [GO:0005739]		FALSE	FALSE	0	0	0	0
cluster1_3rr.inclade2.ortho5.tre	ME21	ME2	FALSE	FALSE	9.58242	1.84741	7.73501	-5.88759	20.3847	11.307	9.07766	2.22933	0.28183	0.00340197	-0.0854755	POLR1_ARATH	Retrovirus-related Pol polyprotein from transposon RE1 (Retro element 1) (AtRE1) [Includes: Protease RE1 (EC 3.4.23.-); Reverse transcriptase RE1 (EC 2.7.7.49); Endonuclease RE1]	DNA integration [GO:0015074]; DNA recombination [GO:0006310]		aspartic-type endopeptidase activity [GO:0004190]; endonuclease activity [GO:0004519]; metal ion binding [GO:0046872]; nucleic acid binding [GO:0003676]; RNA-directed DNA polymerase activity [GO:0003964]	FALSE	FALSE	BEE	0	BEE	BEE
cluster1_3rr.inclade4.ortho4.tre	ME0	ME15	FALSE	FALSE	8.15251	2.50054	5.65198	-3.15144	13.6835	3.56312	10.1204	-6.55724	0.33399	0.0404861	-0.0466438	M810_ARATH	Uncharacterized mitochondrial protein AtMg00810 (ORF240b)		mitochondrion [GO:0005739]		FALSE	FALSE	0	0	0	0
cluster1_3rr.inclade7.ortho1.tre	ME0	ME16	FALSE	FALSE	3.45032	0.50522	2.9451	-2.43988	13.7913	3.10538	10.6859	-7.58052	0.25185	-0.0259038	0.0330227	POLR1_ARATH	Retrovirus-related Pol polyprotein from transposon RE1 (Retro element 1) (AtRE1) [Includes: Protease RE1 (EC 3.4.23.-); Reverse transcriptase RE1 (EC 2.7.7.49); Endonuclease RE1]	DNA integration [GO:0015074]; DNA recombination [GO:0006310]		aspartic-type endopeptidase activity [GO:0004190]; endonuclease activity [GO:0004519]; metal ion binding [GO:0046872]; nucleic acid binding [GO:0003676]; RNA-directed DNA polymerase activity [GO:0003964]	FALSE	FALSE	0	0	0	0
cluster1_3rr.inclade8.ortho2.tre	ME6	ME2	FALSE	FALSE	5.93713	1.9944	3.94272	-1.94832	12.9022	9.36368	3.53851	5.82517	0.43034	0.019416	0.0258036	POLR1_ARATH	Retrovirus-related Pol polyprotein from transposon RE1 (Retro element 1) (AtRE1) [Includes: Protease RE1 (EC 3.4.23.-); Reverse transcriptase RE1 (EC 2.7.7.49); Endonuclease RE1]	DNA integration [GO:0015074]; DNA recombination [GO:0006310]		aspartic-type endopeptidase activity [GO:0004190]; endonuclease activity [GO:0004519]; metal ion binding [GO:0046872]; nucleic acid binding [GO:0003676]; RNA-directed DNA polymerase activity [GO:0003964]	FALSE	FALSE	BEE	0	BEE	BEE
cluster10_1rr.inclade1.ortho3.tre	ME3	ME49	FALSE	FALSE	13.4326	8.42313	5.00952	3.41362	23.4457	3.8059	19.6398	-15.8339	0.19887	-0.0635827	-0.0640855	NA	NA	NA	NA	NA	FALSE	FALSE	0	0	BEE	0
cluster10_2rr.inclade4.ortho2.tre	ME27	ME31	FALSE	FALSE	6.68674	1.71748	4.96926	-3.25178	12.1406	2.64217	9.49843	-6.85626	0.52723	-0.13146	-0.112725	RRPO_OENBE	RNA-directed DNA polymerase homolog (EC 2.7.7.48) (Reverse transcriptase homolog)		mitochondrion [GO:0005739]	RNA-directed 5'-3' RNA polymerase activity [GO:0003968]; RNA-directed DNA polymerase activity [GO:0003964]	FALSE	FALSE	BEE	0	BEE	0
cluster10000_1rr.inclade1.ortho7.tre	ME1	ME1	FALSE	FALSE	3.87345	1.08124	2.79221	-1.71097	11.7957	5.88224	5.91348	-0.0312473	0.44128	-0.000197948	-0.0107922	ISAM2_ARATH	Iron-sulfur assembly protein IscA-like 2, mitochondrial	iron-sulfur cluster assembly [GO:0016226]; protein maturation [GO:0051604]; protein maturation by iron-sulfur cluster transfer [GO:0097428]	mitochondrion [GO:0005739]	2 iron, 2 sulfur cluster binding [GO:0051537]; 4 iron, 4 sulfur cluster binding [GO:0051539]; iron ion binding [GO:0005506]; structural molecule activity [GO:0005198]	FALSE	FALSE	0	0	0	0
cluster10001_1rr.inclade1.ortho3.tre	ME7	ME12	FALSE	FALSE	35.7846	11.5931	24.1915	-12.5984	28.4341	12.3447	16.0894	-3.74467	0.3961	0.048071	0.0604258	WEL2_ARATH	Protein WEAK CHLOROPLAST MOVEMENT UNDER BLUE LIGHT-like 2 (Protein WEL2)	chloroplast accumulation movement [GO:0009904]; chloroplast avoidance movement [GO:0009903]	cytosol [GO:0005829]		FALSE	FALSE	0	BUTTERFLY	0	BUTTERFLY
cluster10002_1rr.inclade1.ortho6.tre	ME14	ME4	FALSE	FALSE	11.105	2.36775	8.73729	-6.36954	21.5266	7.61194	13.9147	-6.30274	0.41616	0.0281287	0.0346283	PP446_ARATH	Pentatricopeptide repeat-containing protein At5g65570	RNA modification [GO:0009451]	intracellular membrane-bounded organelle [GO:0043231]	endonuclease activity [GO:0004519]; RNA binding [GO:0003723]; zinc ion binding [GO:0008270]	FALSE	FALSE	HUMMINGBIRD	0	HUMMINGBIRD	0
cluster10004_1rr.inclade1.ortho3.tre	ME43	ME42	FALSE	FALSE	9.87172	2.8408	7.03092	-4.19012	18.8982	5.58781	13.3104	-7.72255	0.52787	-0.013091	0.0653624	AIGLD_ARATH	AIG2-like protein D (EC 2.3.2.-) (Avirulence-induced gene 2-like protein D) (Putative gamma-glutamylcyclotransferase)			transferase activity, transferring acyl groups [GO:0016746]	FALSE	FALSE	0	0	0	0
cluster10005_1rr.inclade1.ortho1.tre	ME0	ME0	FALSE	FALSE	1.29839	0.193105	1.10529	-0.912184	1.42617	0.220425	1.20574	-0.985316	0.30799	-0.0794501	0.0194976	NA	NA	NA	NA	NA	TRUE	TRUE	0	0	0	0
cluster10006_1rr.inclade1.ortho1.tre	ME4	ME0	FALSE	FALSE	11.2877	3.148	8.13973	-4.99172	1.79189	0.570923	1.22097	-0.650043	0.26362	0.0321733	0.060834	RUK_ARATH	Serine/threonine-protein kinase RUNKEL (Protein EMBRYO DEFECTIVE 3013) (Protein RUNKEL) (EC 2.7.11.1)	cellularization [GO:0007349]; cytokinesis by cell plate formation [GO:0000911]; endosperm cellularization [GO:0010342]; microsporogenesis [GO:0009556]; phragmoplast assembly [GO:0000914]; pollen development [GO:0009555]; protein phosphorylation [GO:0006468]; radial microtubular system formation [GO:0010245]	microtubule [GO:0005874]; phragmoplast [GO:0009524]; plasmodesma [GO:0009506]; preprophase band [GO:0009574]; spindle [GO:0005819]	ATP binding [GO:0005524]; microtubule binding [GO:0008017]; transferase activity [GO:0016740]	FALSE	TRUE	0	0	0	0
cluster10010_1rr.inclade1.ortho1.tre	ME2	ME33	TRUE	FALSE	70.9792	62.5134	8.46576	54.0477	15.5085	2.89319	12.6153	-9.7221	0.0824	-0.0887178	0.0360277	RAA2A_ARATH	Ras-related protein RABA2a (AtRABA2a) (Ras-related protein Rab11C) (AtRab11C)	cytokinesis by cell plate formation [GO:0000911]; protein transport [GO:0015031]	cell plate [GO:0009504]; cytosol [GO:0005829]; endosome [GO:0005768]; endosome membrane [GO:0010008]; Golgi apparatus [GO:0005794]; plasma membrane [GO:0005886]	GTPase activity [GO:0003924]; GTP binding [GO:0005525]	FALSE	FALSE	0	0	0	0
cluster10011_1rr.inclade1.ortho1.tre	ME5	ME8	FALSE	TRUE	17.4965	3.1261	14.3704	-11.2443	15.7072	3.44355	12.2637	-8.82014	0.29973	0.0523834	0.0299719	NA	NA	NA	NA	NA	FALSE	FALSE	HUMMINGBIRD	0	HUMMINGBIRD	0
cluster10013_1rr.inclade1.ortho1.tre	ME0	ME11	FALSE	FALSE	4.77937	2.11037	2.669	-0.558626	13.185	5.34214	7.84282	-2.50068	0.33387	0.0389457	0.00885404	NA	NA	NA	NA	NA	FALSE	FALSE	0	HUMMINGBIRD	0	HUMMINGBIRD
cluster10014_1rr.inclade1.ortho3.tre	ME7	ME3	FALSE	FALSE	29.1846	10.2147	18.9699	-8.7552	36.606	11.1473	25.4587	-14.3114	0.21408	0.137816	0.0593459	DIM1A_ARATH	Ribosomal RNA small subunit methyltransferase (EC 2.1.1.-) (18S nuclear rRNA (adenine(1785)-N(6)/adenine(1786)-N(6))-dimethyltransferase) (Adenosine dimethyl transferase 1A) (Dimethyladenosine transferase 1A)	cell division [GO:0051301]; cell fate specification [GO:0001708]	cytoplasm [GO:0005737]; nucleolus [GO:0005730]; nucleus [GO:0005634]	RNA binding [GO:0003723]; rRNA (adenine-N6,N6-)-dimethyltransferase activity [GO:0000179]	FALSE	FALSE	0	0	0	BUTTERFLY
cluster10016_1rr.inclade1.ortho3.tre	ME24	ME53	FALSE	FALSE	4.00186	0.0978977	3.90396	-3.80606	5.00935	0.672696	4.33666	-3.66396	0.51836	-0.118005	-0.0312964	OCP3_ARATH	Protein OVEREXPRESSOR OF CATIONIC PEROXIDASE 3	abscisic acid-activated signaling pathway [GO:0009738]; defense response [GO:0006952]; defense response to bacterium [GO:0042742]; defense response to fungus [GO:0050832]; defense response to oomycetes [GO:0002229]; induced systemic resistance [GO:0009682]; jasmonic acid mediated signaling pathway [GO:0009867]; regulation of abscisic acid-activated signaling pathway [GO:0009787]; regulation of de…	nucleus [GO:0005634]	DNA binding [GO:0003677]; DNA-binding transcription factor activity [GO:0003700]; peroxidase activity [GO:0004601]	FALSE	FALSE	0	BUTTERFLY	0	BUTTERFLY
cluster10017_1rr.inclade1.ortho1.tre	ME1	ME9	FALSE	FALSE	21.0051	14.8778	6.12726	8.75057	20.1007	5.31668	14.784	-9.46729	0.17562	-0.030552	-0.0381521	BAC2_ARATH	Mitochondrial arginine transporter BAC2 (Mitochondrial basic amino acid carrier 2) (AtMBAC2)	acyl carnitine transport [GO:0006844]; hyperosmotic response [GO:0006972]; mitochondrial transport [GO:0006839]; proline biosynthetic process [GO:0006561]	integral component of membrane [GO:0016021]; mitochondrial inner membrane [GO:0005743]; mitochondrion [GO:0005739]	arginine transmembrane transporter activity [GO:0015181]; L-histidine transmembrane transporter activity [GO:0005290]; L-lysine transmembrane transporter activity [GO:0015189]; L-ornithine transmembrane transporter activity [GO:0000064]	FALSE	FALSE	0	0	0	0
cluster10018_1rr.inclade1.ortho2.tre	ME23	ME13	FALSE	FALSE	11.7462	4.10562	7.64061	-3.53499	27.1077	9.63416	17.4736	-7.83943	0.12948	0.0279708	0.104614	EXP10_ARATH	Expansin-A10 (AtEXPA10) (Alpha-expansin-10) (At-EXP10) (AtEx10) (Ath-ExpAlpha-1.1)	plant-type cell wall organization [GO:0009664]	cell wall [GO:0005618]; extracellular region [GO:0005576]; membrane [GO:0016020]		FALSE	FALSE	BUTTERFLY	BUTTERFLY	BUTTERFLY	BUTTERFLY
cluster10019_1rr.inclade1.ortho3.tre	ME8	ME29	FALSE	FALSE	9.5692	2.60946	6.95974	-4.35029	14.3897	2.27363	12.1161	-9.84248	0.25154	-0.0187389	0.0452627	NA	NA	NA	NA	NA	FALSE	FALSE	0	HUMMINGBIRD	0	HUMMINGBIRD
cluster10019_1rr.inclade2.ortho1.tre	ME19	ME28	FALSE	FALSE	2.88078	0.604509	2.27627	-1.67176	4.55624	0.312763	4.24348	-3.93071	0.45301	0.0405297	0.0223665	NA	NA	NA	NA	NA	FALSE	TRUE	0	0	0	0
cluster10020_1rr.inclade1.ortho1.tre	ME9	ME4	FALSE	FALSE	30.7796	11.2805	19.499	-8.21846	54.4842	28.5547	25.9295	2.62518	0.48512	0.0853814	0.0749487	RHB1A_ARATH	Probable E3 ubiquitin-protein ligase RHB1A (EC 2.3.2.27) (RING-H2 finger B1a) (RING-H2 zinc finger protein RHB1a) (RING-type E3 ubiquitin transferase RHB1A)	protein ubiquitination [GO:0016567]		metal ion binding [GO:0046872]; transferase activity [GO:0016740]	FALSE	FALSE	HUMMINGBIRD	0	HUMMINGBIRD	0
cluster10022_1rr.inclade1.ortho1.tre	ME44	ME7	FALSE	FALSE	25.5479	3.00091	22.547	-19.5461	26.2551	9.40953	16.8456	-7.43607	0.08188	0.069018	0.0454531	NA	NA	NA	NA	NA	FALSE	FALSE	0	0	0	0
cluster10024_1rr.inclade1.ortho3.tre	ME47	ME36	TRUE	FALSE	16.4801	5.411	11.0691	-5.65811	27.6662	9.98365	17.6826	-7.69892	0.3989	-0.0463265	0.049235	RK122_SECCE	50S ribosomal protein L12-2, chloroplastic (CL12-2)	translation [GO:0006412]	chloroplast [GO:0009507]; ribosome [GO:0005840]	structural constituent of ribosome [GO:0003735]	FALSE	FALSE	0	0	0	0
cluster10025_1rr.inclade1.ortho4.tre	ME13	ME55	FALSE	FALSE	16.5117	8.2065	8.30516	-0.0986677	13.7259	2.48431	11.2416	-8.75732	0.2423	0.0609049	0.0146981	CHX15_ARATH	Cation/H(+) antiporter 15 (Protein CATION/H+ EXCHANGER 15) (AtCHX15)	monovalent inorganic cation transport [GO:0015672]; potassium ion transport [GO:0006813]; regulation of pH [GO:0006885]	endomembrane system [GO:0012505]; integral component of membrane [GO:0016021]	solute:proton antiporter activity [GO:0015299]	FALSE	FALSE	HUMMINGBIRD	HUMMINGBIRD	HUMMINGBIRD	HUMMINGBIRD
cluster10026_1rr.inclade1.ortho3.tre	ME24	ME16	FALSE	FALSE	8.43753	3.10393	5.3336	-2.22967	11.765	2.85119	8.91378	-6.06259	0.21115	-0.0486784	0.0138026	1433A_SOYBN	14-3-3-like protein A (SGF14A)			protein domain specific binding [GO:0019904]	FALSE	FALSE	0	0	0	0
cluster10027_1rr.inclade1.ortho2.tre	ME6	ME49	FALSE	FALSE	7.59514	4.05087	3.54426	0.506613	27.4821	3.68124	23.8009	-20.1196	0.34719	0.0222775	-0.0572981	NA	NA	NA	NA	NA	FALSE	FALSE	BEE	0	BEE	0
cluster10028_1rr.inclade1.ortho1.tre	ME4	ME4	FALSE	FALSE	31.4693	5.80672	25.6626	-19.8559	23.8435	6.52079	17.3227	-10.8019	0.1905	0.0620147	0.0350062	ATXR3_ARATH	Histone-lysine N-methyltransferase ATXR3 (EC 2.1.1.43) (Protein SET DOMAIN GROUP 2) (Trithorax-related protein 3) (TRX-related protein 3)	carpel development [GO:0048440]; post-embryonic development [GO:0009791]; stamen development [GO:0048443]; vegetative to reproductive phase transition of meristem [GO:0010228]	nucleus [GO:0005634]	histone methyltransferase activity (H3-K4 specific) [GO:0042800]	FALSE	FALSE	0	0	0	0
cluster10030_1rr.inclade1.ortho1.tre	ME60	ME24	FALSE	FALSE	4.98442	1.02337	3.96105	-2.93768	17.7574	3.69565	14.0618	-10.3662	0.31937	-0.0252566	-0.0624117	ATG16_ARATH	Autophagy-related protein 16	autophagosome assembly [GO:0000045]; protein transport [GO:0015031]	autophagosome membrane [GO:0000421]		FALSE	FALSE	0	HUMMINGBIRD	0	HUMMINGBIRD
cluster10031_1rr.inclade1.ortho1.tre	ME0	ME2	FALSE	FALSE	3.08326	0.993658	2.0896	-1.09594	8.19595	2.20574	5.99021	-3.78447	0.24729	0.0362	0.0429385	PPR45_ARATH	Pentatricopeptide repeat-containing protein At1g15510, chloroplastic (Protein EARLY CHLOROPLAST BIOGENESIS 2) (AtECB2) (Protein VANILLA CREAM 1)	chloroplast organization [GO:0009658]; response to light stimulus [GO:0009416]; RNA modification [GO:0009451]	chloroplast [GO:0009507]	endonuclease activity [GO:0004519]; RNA binding [GO:0003723]; zinc ion binding [GO:0008270]	FALSE	FALSE	0	0	0	BEE
cluster10031_2rr.inclade1.ortho2.tre	ME42	ME55	FALSE	FALSE	20.8068	3.07284	17.734	-14.6611	17.4112	2.74928	14.6619	-11.9126	0.23796	0.103892	-0.0152809	PPR32_ARATH	Pentatricopeptide repeat-containing protein At1g11290, chloroplastic (Protein CHLORORESPIRATORY REDUCTION 22)	mRNA modification [GO:0016556]; mRNA processing [GO:0006397]	chloroplast [GO:0009507]	endonuclease activity [GO:0004519]; RNA binding [GO:0003723]; zinc ion binding [GO:0008270]	FALSE	FALSE	HUMMINGBIRD	HUMMINGBIRD	HUMMINGBIRD	HUMMINGBIRD
cluster10033_1rr.inclade1.ortho3.tre	ME2	ME3	FALSE	FALSE	2.97473	1.79882	1.17591	0.622904	7.19937	2.59	4.60936	-2.01936	0.36476	-0.03748	0.0137742	NA	NA	NA	NA	NA	FALSE	FALSE	0	0	0	BUTTERFLY
cluster10034_2rr.inclade1.ortho2.tre	ME42	ME18	FALSE	FALSE	18.3212	3.09313	15.2281	-12.135	26.5117	2.52014	23.9916	-21.4714	0.41941	0.0965757	0.0904588	PPR87_ARATH	Pentatricopeptide repeat-containing protein At1g61870, mitochondrial (Protein PENTATRICOPEPTIDE REPEAT 336)	RNA modification [GO:0009451]	membrane [GO:0016020]; mitochondrial inner membrane [GO:0005743]; mitochondrion [GO:0005739]	endonuclease activity [GO:0004519]; nucleotide binding [GO:0000166]; RNA binding [GO:0003723]	FALSE	FALSE	HUMMINGBIRD	HUMMINGBIRD	HUMMINGBIRD	HUMMINGBIRD
cluster10035_1rr.inclade1.ortho3.tre	ME1	ME2	FALSE	FALSE	38.02	29.3124	8.70766	20.6047	87.1924	26.7049	60.4875	-33.7826	0.37663	-0.00603447	0.000848608	BAG8_ARATH	BAG family molecular chaperone regulator 8, chloroplastic (Bcl-2-associated athanogene 8)	protein folding [GO:0006457]; response to external biotic stimulus [GO:0043207]; response to temperature stimulus [GO:0009266]	chloroplast [GO:0009507]; plasma membrane [GO:0005886]; plasmodesma [GO:0009506]	calmodulin binding [GO:0005516]	FALSE	FALSE	0	0	0	BEE
cluster10036_1rr.inclade1.ortho4.tre	ME0	ME59	FALSE	FALSE	7.28253	1.57922	5.70331	-4.12409	11.6952	1.62202	10.0731	-8.45112	0.31727	-0.0276188	0.0168158	RMA1_CAPAN	E3 ubiquitin-protein ligase RMA1H1 (EC 2.3.2.27) (Protein RING membrane-anchor 1 homolog 1) (RING-type E3 ubiquitin transferase RMA1H1)	proteasome-mediated ubiquitin-dependent protein catabolic process [GO:0043161]; protein ubiquitination [GO:0016567]; response to cold [GO:0009409]; response to ethylene [GO:0009723]; response to osmotic stress [GO:0006970]; response to water deprivation [GO:0009414]; response to wounding [GO:0009611]	endoplasmic reticulum membrane [GO:0005789]; integral component of membrane [GO:0016021]	metal ion binding [GO:0046872]; ubiquitin-protein transferase activity [GO:0004842]	FALSE	FALSE	0	0	0	0
cluster10037_1rr.inclade1.ortho3.tre	ME16	ME12	FALSE	FALSE	13.3024	5.42211	7.88027	-2.45816	9.64691	2.63996	7.00695	-4.36699	0.39416	0.0731311	-0.0341347	SIGB_ARATH	RNA polymerase sigma factor sigB (Sigma factor B) (Sigma-B) (Protein ABERRANT CHLOROPLAST 1) (RNA polymerase sigma factor sig1) (Atsig1) (Sigma factor 1) (RNA polymerase sigma factor sig2) (Atsig2) (Sigma factor 2) (RNA polymerase sigma factor sigA) (Sigma factor A) (Sigma-A)	cellular response to light stimulus [GO:0071482]; chloroplast organization [GO:0009658]; DNA-templated transcription, initiation [GO:0006352]; regulation of RNA biosynthetic process [GO:2001141]; response to ME6 light [GO:0010114]; tRNA metabolic process [GO:0006399]	chloroplast [GO:0009507]	DNA binding [GO:0003677]; DNA-binding transcription factor activity [GO:0003700]; sigma factor activity [GO:0016987]	FALSE	FALSE	BUTTERFLY	BUTTERFLY	BUTTERFLY	BUTTERFLY
cluster10038_1rr.inclade1.ortho2.tre	ME32	ME49	FALSE	FALSE	9.45025	1.16193	8.28832	-7.12639	16.6034	1.34034	15.2631	-13.9228	999	0.0296376	0.0473716	YMF01_MARPO	Uncharacterized mitochondrial protein ymf1 (ORF168)		mitochondrion [GO:0005739]		FALSE	FALSE	0	0	0	0
cluster10039_1rr.inclade1.ortho2.tre	ME9	ME40	FALSE	FALSE	6.71567	1.49289	5.22278	-3.7299	16.2745	2.10855	14.1659	-12.0574	0.35449	0.0759475	0.0473149	LRR1_ARATH	Leucine-rich repeat protein 1 (AtLRR1)	cell surface receptor signaling pathway [GO:0007166]; defense response [GO:0006952]; protein phosphorylation [GO:0006468]; signal transduction [GO:0007165]	plasma membrane [GO:0005886]	transmembrane receptor protein serine/threonine kinase activity [GO:0004675]	FALSE	FALSE	HUMMINGBIRD	BUTTERFLY	HUMMINGBIRD	BUTTERFLY
cluster10041_1rr.inclade1.ortho1.tre	ME2	ME1	FALSE	FALSE	30.44	22.8414	7.59855	15.2429	22.9793	12.0078	10.9715	1.03632	0.37425	-0.0812676	-0.0731508	UBC24_ARATH	Probable ubiquitin-conjugating enzyme E2 24 (EC 2.3.2.23) (AtPHO2) (E2 ubiquitin-conjugating enzyme 24) (Ubiquitin carrier protein 24) (Ubiquitin-protein ligase 24)	cellular protein catabolic process [GO:0044257]; cellular response to phosphate starvation [GO:0016036]; phosphate ion homeostasis [GO:0055062]; phosphate ion transport [GO:0006817]; regulation of phosphate transmembrane transport [GO:2000185]	endoplasmic reticulum [GO:0005783]; endoplasmic reticulum membrane [GO:0005789]; Golgi apparatus [GO:0005794]; Golgi membrane [GO:0000139]	ATP binding [GO:0005524]; ligase activity [GO:0016874]; ubiquitin protein ligase activity [GO:0061630]; ubiquitin protein ligase binding [GO:0031625]	FALSE	FALSE	0	0	0	0
cluster10042_1rr.inclade1.ortho4.tre	ME15	ME7	FALSE	FALSE	25.8119	6.83465	18.9772	-12.1426	59.7625	23.7086	36.0539	-12.3453	1.11602	0.226326	0.21321	ATP61_ARATH	ATP synthase subunit a-1 (F-ATPase protein 6) (P6-1)	ATP synthesis coupled proton transport [GO:0015986]	integral component of membrane [GO:0016021]; mitochondrial inner membrane [GO:0005743]; proton-transporting ATP synthase complex, coupling factor F(o) [GO:0045263]	proton transmembrane transporter activity [GO:0015078]	FALSE	FALSE	0	0	0	0
cluster10042_1rr.inclade1.ortho5.tre	ME17	ME6	FALSE	FALSE	7.82406	3.99551	3.82855	0.166968	9.61295	1.81791	7.79504	-5.97712	0.49177	-0.113775	-0.0865957	ATP6_TOBAC	ATP synthase subunit a (F-ATPase protein 6)	ATP synthesis coupled proton transport [GO:0015986]	integral component of membrane [GO:0016021]; mitochondrial inner membrane [GO:0005743]; proton-transporting ATP synthase complex, coupling factor F(o) [GO:0045263]	proton transmembrane transporter activity [GO:0015078]	FALSE	FALSE	0	HUMMINGBIRD	0	HUMMINGBIRD
cluster10043_1rr.inclade1.ortho1.tre	ME27	ME2	TRUE	TRUE	45.9671	25.6542	20.3129	5.34128	67.1538	52.4257	14.7281	37.6976	0.01501	-0.0995585	-0.102347	NA	NA	NA	NA	NA	FALSE	FALSE	BEE	0	BEE	BEE
cluster10044_1rr.inclade1.ortho2.tre	ME0	ME40	FALSE	FALSE	1.78043	0.475341	1.30509	-0.829751	5.81765	0.544475	5.27317	-4.7287	0.389	0.0307283	-0.00310717	NA	NA	NA	NA	NA	TRUE	FALSE	0	BUTTERFLY	0	BUTTERFLY
cluster10046_1rr.inclade1.ortho1.tre	ME30	ME25	FALSE	FALSE	4.31149	0.568537	3.74295	-3.17441	10.7251	2.17598	8.54908	-6.3731	0.17039	0.0642281	0.0658659	EXOL7_ARATH	Protein EXORDIUM-like 7		apoplast [GO:0048046]; extracellular space [GO:0005615]		FALSE	FALSE	0	0	HUMMINGBIRD	0
cluster10046_2rr.inclade1.ortho3.tre	ME4	ME3	FALSE	TRUE	52.1084	17.3005	34.8079	-17.5073	45.6629	27.1584	18.5046	8.6538	0.1515	0.120381	-0.0381335	EXOL5_ARATH	Protein EXORDIUM-like 5		apoplast [GO:0048046]; extracellular space [GO:0005615]		FALSE	FALSE	0	0	0	BUTTERFLY
cluster10049_1rr.inclade1.ortho3.tre	ME1	ME2	FALSE	FALSE	8.50526	3.74668	4.75858	-1.0119	79.9424	19.9831	59.9593	-39.9763	0.23052	-0.139739	-0.0748897	AB8B_ARATH	Putative ABC transporter B family member 8 (ABC transporter ABCB.8) (AtABCB8) (P-glycoprotein 8) (Putative multidrug resistance protein 22)		integral component of membrane [GO:0016021]	ATPase activity, coupled to transmembrane movement of substances [GO:0042626]; ATP binding [GO:0005524]	FALSE	FALSE	0	0	0	BEE
cluster10050_1rr.inclade1.ortho1.tre	ME0	ME6	FALSE	FALSE	4.77225	1.43136	3.34089	-1.90953	9.98987	1.11807	8.87181	-7.75374	0.2421	-0.0175158	-0.0251743	PP165_ARATH	Pentatricopeptide repeat-containing protein At2g20540	mitochondrial mRNA modification [GO:0080156]	mitochondrion [GO:0005739]	endonuclease activity [GO:0004519]; RNA binding [GO:0003723]	FALSE	FALSE	0	HUMMINGBIRD	0	HUMMINGBIRD
cluster10050_2rr.inclade1.ortho1.tre	ME7	ME3	FALSE	FALSE	71.0716	25.3112	45.7605	-20.4493	93.7977	40.5388	53.2589	-12.7201	0.24272	0.188133	0.00642222	PP449_ARATH	Pentatricopeptide repeat-containing protein At5g66520	chloroplast RNA modification [GO:1900865]; cytidine to uridine editing [GO:0016554]	chloroplast [GO:0009507]	endonuclease activity [GO:0004519]; RNA binding [GO:0003723]; zinc ion binding [GO:0008270]	FALSE	FALSE	0	0	0	BUTTERFLY
cluster10052_1rr.inclade1.ortho4.tre	ME0	ME54	FALSE	FALSE	0.890618	0.156195	0.734423	-0.578227	17.8679	1.53136	16.3365	-14.8052	0.34094	-0.0091137	-0.101298	ATB20_ARATH	Homeobox-leucine zipper protein ATHB-20 (HD-ZIP protein ATHB-20) (Homeodomain transcription factor ATHB-20)	response to auxin [GO:0009733]; transcription, DNA-templated [GO:0006351]	nucleus [GO:0005634]	DNA-binding transcription factor activity [GO:0003700]; sequence-specific DNA binding [GO:0043565]	TRUE	FALSE	0	0	0	HUMMINGBIRD
cluster10053_1rr.inclade1.ortho2.tre	ME1	ME1	FALSE	TRUE	19.1517	12.0509	7.10088	4.94998	49.9532	29.2187	20.7345	8.48421	0.40307	-0.0065926	-0.0443965	NMAT4_ARATH	Nuclear intron maturase 4, mitochondrial (AtnMat4) (EC 3.1.-.-) (Nuclear intron maturase 2 b) (AtnMat2b)	Group II intron splicing [GO:0000373]; intron homing [GO:0006314]; mitochondrial mRNA processing [GO:0090615]; mitochondrial RNA modification [GO:1900864]; mitochondrion organization [GO:0007005]; regulation of polysaccharide biosynthetic process [GO:0032885]; seed germination [GO:0009845]; seedling development [GO:0090351]	chloroplast [GO:0009507]; mitochondrion [GO:0005739]	DNA binding [GO:0003677]; endonuclease activity [GO:0004519]; metal ion binding [GO:0046872]	FALSE	FALSE	0	0	0	0
cluster10058_1rr.inclade1.ortho2.tre	ME7	ME7	FALSE	TRUE	58.5417	21.7872	36.7545	-14.9673	62.2436	24.4664	37.7772	-13.3108	0.12384	0.183119	0.125219	CCR1_ARATH	Cinnamoyl-CoA reductase 1 (AtCCR1) (EC 1.2.1.44) (Protein IRREGULAR XYLEM 4)	circadian rhythm [GO:0007623]; lignin biosynthetic process [GO:0009809]; response to cold [GO:0009409]	cytosol [GO:0005829]	cinnamoyl-CoA reductase activity [GO:0016621]; coenzyme binding [GO:0050662]	FALSE	FALSE	0	0	0	0
cluster10060_1rr.inclade1.ortho3.tre	ME0	ME28	FALSE	FALSE	11.4179	6.05707	5.36082	0.696243	22.552	8.55211	13.9999	-5.44781	0.05946	-0.0507024	0.0490486	BPC1_ARATH	Protein BASIC PENTACYSTEINE1 (AtBPC1)	regulation of developmental process [GO:0050793]; regulation of transcription, DNA-templated [GO:0006355]; response to ethylene [GO:0009723]; transcription, DNA-templated [GO:0006351]	nucleus [GO:0005634]	DNA binding [GO:0003677]; sequence-specific DNA binding [GO:0043565]	FALSE	FALSE	0	0	0	0
cluster10062_1rr.inclade1.ortho2.tre	ME15	ME7	FALSE	FALSE	29.9749	11.8723	18.1025	-6.23016	64.3489	20.0016	44.3472	-24.3456	0.34041	0.118104	0.151248	CNR8_MAIZE	Cell number regulator 8 (ZmCNR08)		integral component of membrane [GO:0016021]		FALSE	FALSE	0	0	0	0
cluster10062_1rr.inclade2.ortho1.tre	ME2	ME16	TRUE	FALSE	60.0325	50.362	9.67043	40.6916	17.0163	6.10782	10.9085	-4.8007	0.15675	-0.0650358	-0.00774527	CNR8_MAIZE	Cell number regulator 8 (ZmCNR08)		integral component of membrane [GO:0016021]		FALSE	FALSE	0	0	0	0
cluster10062_1rr.inclade2.ortho2.tre	ME22	ME14	FALSE	FALSE	24.7199	14.5509	10.169	4.38194	40.7201	24.7179	16.0022	8.71569	0.27956	-0.019658	-0.0875767	CNR8_MAIZE	Cell number regulator 8 (ZmCNR08)		integral component of membrane [GO:0016021]		FALSE	FALSE	HUMMINGBIRD	HUMMINGBIRD	HUMMINGBIRD	HUMMINGBIRD
cluster10063_1rr.inclade1.ortho4.tre	ME45	ME42	FALSE	FALSE	5.09063	0.265006	4.82562	-4.56061	18.0745	1.34118	16.7333	-15.3921	0.2582	0.00508615	-0.00922421	FER3_MAIZE	Ferredoxin-3, chloroplastic (Ferredoxin III) (Fd III)	electron transport chain [GO:0022900]	chloroplast [GO:0009507]; chloroplast stroma [GO:0009570]; etioplast stroma [GO:0009578]	2 iron, 2 sulfur cluster binding [GO:0051537]; electron transfer activity [GO:0009055]; metal ion binding [GO:0046872]	FALSE	FALSE	HUMMINGBIRD	0	HUMMINGBIRD	0
cluster10064_1rr.inclade1.ortho3.tre	ME6	ME5	FALSE	FALSE	12.001	6.93758	5.06346	1.87412	44.3415	31.8666	12.4749	19.3917	0.26617	0.0585297	0.0351473	EGS1_OCIBA	Eugenol synthase 1 (EC 1.1.1.318)	phenylpropanoid biosynthetic process [GO:0009699]		oxidoreductase activity [GO:0016491]	FALSE	FALSE	BEE	BEE	BEE	BEE
cluster10064_1rr.inclade1.ortho4.tre	ME5	ME0	FALSE	FALSE	2.58625	0.457924	2.12833	-1.6704	4.0502	0.403551	3.64664	-3.24309	0.56525	0.0460264	0.0506376	EGS1_OCIBA	Eugenol synthase 1 (EC 1.1.1.318)	phenylpropanoid biosynthetic process [GO:0009699]		oxidoreductase activity [GO:0016491]	TRUE	TRUE	HUMMINGBIRD	0	HUMMINGBIRD	0
cluster10066_1rr.inclade1.ortho3.tre	ME14	ME60	FALSE	FALSE	10.9906	0.940049	10.0505	-9.1105	22.4016	3.11115	19.2905	-16.1793	0.37168	0.0110331	0.0376777	AATP4_ARATH	AAA-ATPase At2g46620 (EC 3.6.1.3)		integral component of membrane [GO:0016021]	ATPase activity [GO:0016887]; ATP binding [GO:0005524]	FALSE	FALSE	HUMMINGBIRD	0	HUMMINGBIRD	0
cluster10067_1rr.inclade1.ortho2.tre	ME1	ME9	FALSE	FALSE	33.9447	19.8135	14.1312	5.68234	71.5645	29.5603	42.0042	-12.4439	0.18804	-0.0313187	-0.0317007	GDL62_ARATH	GDSL esterase/lipase At4g10955 (EC 3.1.1.-)	lipid catabolic process [GO:0016042]		hydrolase activity [GO:0016787]	FALSE	FALSE	0	0	0	0
cluster10068_1rr.inclade1.ortho6.tre	ME16	ME12	TRUE	FALSE	33.6837	17.2232	16.4605	0.762674	54.4526	27.4577	26.995	0.462666	0.25329	0.108781	0.0946036	TI10A_ARATH	Protein TIFY 10A (Jasmonate ZIM domain-containing protein 1)	defense response to bacterium [GO:0042742]; flower development [GO:0009908]; jasmonic acid mediated signaling pathway [GO:0009867]; negative regulation of nucleic acid-templated transcription [GO:1903507]; pollen development [GO:0009555]; regulation of cellular response to alkaline pH [GO:1900067]; regulation of defense response [GO:0031347]; regulation of jasmonic acid mediated signaling pathway…	nucleus [GO:0005634]	transcription corepressor activity [GO:0003714]	FALSE	FALSE	BUTTERFLY	BUTTERFLY	BUTTERFLY	BUTTERFLY
cluster10070_1rr.inclade1.ortho4.tre	ME11	ME6	FALSE	FALSE	11.5923	1.80766	9.78466	-7.97699	10.8047	2.27842	8.52629	-6.24787	0.46679	0.0715524	-0.025962	NA	NA	NA	NA	NA	FALSE	FALSE	0	HUMMINGBIRD	0	HUMMINGBIRD
cluster10071_1rr.inclade1.ortho2.tre	ME22	ME22	FALSE	FALSE	6.04731	0.829039	5.21827	-4.38923	10.5297	2.86274	7.66694	-4.8042	0.06154	0.0418854	0.00689355	NRPB1_ARATH	DNA-directed RNA polymerase II subunit 1 (DNA-directed RNA polymerase II subunit RPB1) (DNA polymerase II subunit B1) (EC 2.7.7.6) (DNA-directed RNA polymerase III largest subunit)	transcription by RNA polymerase II [GO:0006366]	chloroplast [GO:0009507]; DNA-directed RNA polymerase II, core complex [GO:0005665]; plasmodesma [GO:0009506]; vacuole [GO:0005773]	DNA binding [GO:0003677]; DNA-directed 5'-3' RNA polymerase activity [GO:0003899]; metal ion binding [GO:0046872]	FALSE	FALSE	HUMMINGBIRD	HUMMINGBIRD	HUMMINGBIRD	HUMMINGBIRD
cluster10072_1rr.inclade1.ortho2.tre	ME36	ME18	FALSE	FALSE	4.39877	1.84278	2.55599	-0.713213	12.8055	3.78305	9.02244	-5.23939	0.23288	-0.0397283	0.0557623	HEX6_RICCO	Hexose carrier protein HEX6	carbohydrate transport [GO:0008643]	integral component of membrane [GO:0016021]	symporter activity [GO:0015293]	FALSE	FALSE	HUMMINGBIRD	HUMMINGBIRD	HUMMINGBIRD	HUMMINGBIRD
cluster10075_1rr.inclade1.ortho5.tre	ME0	ME19	FALSE	TRUE	2.19816	0.27159	1.92657	-1.65498	2.92166	0.458016	2.46364	-2.00563	0.41728	-0.0077291	-0.0728817	NA	NA	NA	NA	NA	TRUE	TRUE	0	0	0	0
cluster10076_1rr.inclade1.ortho1.tre	ME8	ME4	FALSE	FALSE	15.8752	6.6074	9.26781	-2.6604	64.3796	37.4146	26.9649	10.4497	0.14465	0.0260875	0.0921733	MTP4_ORYSJ	Metal tolerance protein 4 (OsMTP4)		integral component of membrane [GO:0016021]; vacuolar membrane [GO:0005774]	cation transmembrane transporter activity [GO:0008324]	FALSE	FALSE	0	0	0	0
cluster10077_1rr.inclade1.ortho1.tre	ME15	ME3	FALSE	FALSE	12.7331	3.6067	9.12643	-5.51974	24.2588	13.4673	10.7915	2.67583	0.17729	0.0516787	0.0568803	FTIP1_ARATH	FT-interacting protein 1	cellular protein localization [GO:0034613]; flower development [GO:0009908]; long-day photoperiodism, flowering [GO:0048574]; positive regulation of flower development [GO:0009911]; vegetative to reproductive phase transition of meristem [GO:0010228]	endoplasmic reticulum [GO:0005783]; endoplasmic reticulum membrane [GO:0005789]; integral component of membrane [GO:0016021]; plasmodesma [GO:0009506]; plasmodesmatal endoplasmic reticulum [GO:0009511]	protein transporter activity [GO:0008565]; transferase activity, transferring glycosyl groups [GO:0016757]	FALSE	FALSE	0	0	0	BUTTERFLY
cluster10077_1rr.inclade2.ortho3.tre	ME1	ME1	FALSE	FALSE	19.5709	12.415	7.15586	5.25917	48.3054	31.0232	17.2822	13.741	0.13833	-0.00778215	-0.0274298	FTIP1_ARATH	FT-interacting protein 1	cellular protein localization [GO:0034613]; flower development [GO:0009908]; long-day photoperiodism, flowering [GO:0048574]; positive regulation of flower development [GO:0009911]; vegetative to reproductive phase transition of meristem [GO:0010228]	endoplasmic reticulum [GO:0005783]; endoplasmic reticulum membrane [GO:0005789]; integral component of membrane [GO:0016021]; plasmodesma [GO:0009506]; plasmodesmatal endoplasmic reticulum [GO:0009511]	protein transporter activity [GO:0008565]; transferase activity, transferring glycosyl groups [GO:0016757]	FALSE	FALSE	0	0	0	0
cluster10078_1rr.inclade1.ortho2.tre	ME0	ME34	FALSE	FALSE	11.5228	2.7331	8.78967	-6.05657	24.1534	6.12595	18.0275	-11.9015	0.2773	0.0666682	0.0853475	GALS1_ARATH	Galactan beta-1,4-galactosyltransferase GALS1 (EC 2.4.1.-) (Beta-1,4-galactan synthase) (Galactan synthase 1)	cell wall biogenesis [GO:0042546]; cell wall organization [GO:0071555]; pectin biosynthetic process [GO:0045489]	Golgi apparatus [GO:0005794]; Golgi membrane [GO:0000139]; integral component of membrane [GO:0016021]	beta-1,3-galactosyltransferase activity [GO:0048531]	FALSE	FALSE	0	0	0	0
cluster10079_2rr.inclade1.ortho3.tre	ME0	ME37	FALSE	FALSE	1.63913	0.422337	1.2168	-0.794459	5.4035	0.664508	4.739	-4.07449	0.08798	0.0168825	-0.0959472	ALMTC_ARATH	Aluminum-activated malate transporter 12 (AtALMT12) (Quick anion channel 1)	stomatal movement [GO:0010118]; sulfate transport [GO:0008272]	endomembrane system [GO:0012505]; integral component of membrane [GO:0016021]; plant-type vacuole membrane [GO:0009705]; plasma membrane [GO:0005886]	anion transmembrane transporter activity [GO:0008509]; malate transmembrane transporter activity [GO:0015140]	TRUE	FALSE	0	0	0	0
cluster10080_1rr.inclade1.ortho1.tre	ME4	ME4	FALSE	TRUE	44.4075	12.4479	31.9596	-19.5117	10.9785	1.62388	9.35462	-7.73074	0.06885	0.0546044	0.0634067	NACA1_ARATH	Nascent polypeptide-associated complex subunit alpha-like protein 1 (NAC-alpha-like protein 1) (Alpha-NAC-like protein 1)	protein transport [GO:0015031]; response to salt stress [GO:0009651]	cytosol [GO:0005829]; cytosolic ribosome [GO:0022626]; nascent polypeptide-associated complex [GO:0005854]; plasmodesma [GO:0009506]		FALSE	FALSE	0	0	0	0
cluster10083_1rr.inclade1.ortho1.tre	ME2	ME0	FALSE	TRUE	2.36474	0.526609	1.83813	-1.31152	1.47597	0.197345	1.27863	-1.08128	0.36984	-0.00564708	0.0258833	SRF2_ARATH	Protein STRUBBELIG-RECEPTOR FAMILY 2 (Leucine-rich repeat receptor kinase-like protein SRF2)	cell surface receptor signaling pathway [GO:0007166]; protein phosphorylation [GO:0006468]	integral component of membrane [GO:0016021]; plasma membrane [GO:0005886]	ATP binding [GO:0005524]; transmembrane receptor protein serine/threonine kinase activity [GO:0004675]	TRUE	TRUE	0	0	0	0
cluster10085_1rr.inclade1.ortho3.tre	ME12	ME0	FALSE	FALSE	10.018	2.51083	7.50716	-4.99633	19.238	1.69466	17.5434	-15.8487	0.26156	0.0299048	-0.129497	P2C47_ARATH	Probable protein phosphatase 2C 47 (AtPP2C47) (EC 3.1.3.16)			metal ion binding [GO:0046872]; protein serine/threonine phosphatase activity [GO:0004722]	FALSE	FALSE	0	0	0	0
cluster10086_1rr.inclade1.ortho3.tre	ME8	ME4	FALSE	TRUE	26.6973	14.5451	12.1522	2.39287	40.7098	16.95	23.7598	-6.80977	0.23854	-0.0147909	0.0310306	MYB1_ARATH	Transcription factor MYB1 (Myb-related protein 1) (AtMYB1)	cell differentiation [GO:0030154]; regulation of transcription by RNA polymerase II [GO:0006357]; response to salicylic acid [GO:0009751]; transcription, DNA-templated [GO:0006351]	nucleus [GO:0005634]	DNA-binding transcription factor activity [GO:0003700]; RNA polymerase II transcription factor activity, sequence-specific DNA binding [GO:0000981]; sequence-specific DNA binding [GO:0043565]; transcription factor activity, RNA polymerase II transcription factor recruiting [GO:0001135]; transcription regulatory region DNA binding [GO:0044212]	FALSE	FALSE	0	0	0	0
cluster10087_1rr.inclade1.ortho2.tre	ME17	ME15	FALSE	FALSE	18.5212	9.27272	9.24851	0.0242085	23.533	10.9656	12.5674	-1.60176	0.30533	-0.021359	0.00771694	PPR23_ARATH	Pentatricopeptide repeat-containing protein At1g09190	RNA modification [GO:0009451]	intracellular membrane-bounded organelle [GO:0043231]	endonuclease activity [GO:0004519]; RNA binding [GO:0003723]	FALSE	FALSE	0	0	0	0
cluster10088_1rr.inclade1.ortho1.tre	ME38	ME10	FALSE	FALSE	5.2441	0.939296	4.3048	-3.3655	12.5954	2.59272	10.0026	-7.40992	0.24237	-0.060202	-0.0502424	TATB_ARATH	Sec-independent protein translocase protein TATB, chloroplastic (Protein HIGH CHLOROPHYLL FLUORESCENCE 106) (Protein TWIN-ARGININE TRANSLOCATION B)	positive regulation of stomatal opening [GO:1902458]; protein import into chloroplast thylakoid membrane [GO:0045038]; protein secretion [GO:0009306]; regulation of reactive oxygen species biosynthetic process [GO:1903426]; regulation of response to water deprivation [GO:2000070]; response to cold [GO:0009409]	chloroplast [GO:0009507]; chloroplast envelope [GO:0009941]; chloroplast thylakoid [GO:0009534]; chloroplast thylakoid membrane [GO:0009535]; integral component of membrane [GO:0016021]; TAT protein transport complex [GO:0033281]; thylakoid [GO:0009579]	proton motive force dependent protein transmembrane transporter activity [GO:0009977]	FALSE	FALSE	0	0	0	0
cluster10091_1rr.inclade1.ortho2.tre	ME21	ME2	FALSE	TRUE	1.76464	0.345763	1.41887	-1.07311	5.61529	1.74261	3.87268	-2.13006	0.30007	-0.0309821	0.00210003	NA	NA	NA	NA	NA	TRUE	FALSE	BEE	0	BEE	BEE
cluster10092_1rr.inclade1.ortho4.tre	ME18	ME9	FALSE	FALSE	18.7392	4.21236	14.5268	-10.3145	13.5724	5.51227	8.06014	-2.54787	0.27034	-0.128982	-0.0109833	IRX14_ARATH	Probable beta-1,4-xylosyltransferase IRX14 (EC 2.4.2.-) (Protein IRREGULAR XYLEM 14) (Xylan xylosyltransferase IRX14)	cell wall organization [GO:0071555]; fruit development [GO:0010154]; glucuronoxylan biosynthetic process [GO:0010417]; mucilage biosynthetic process involved in seed coat development [GO:0048354]; plant-type secondary cell wall biogenesis [GO:0009834]; shoot system development [GO:0048367]; xylan biosynthetic process [GO:0045492]; xylem and phloem pattern formation [GO:0010051]	endosome [GO:0005768]; Golgi apparatus [GO:0005794]; Golgi membrane [GO:0000139]; integral component of membrane [GO:0016021]; trans-Golgi network [GO:0005802]	1,4-beta-D-xylan synthase activity [GO:0047517]; galactosylgalactosylxylosylprotein 3-beta-glucuronosyltransferase activity [GO:0015018]; xylosyltransferase activity [GO:0042285]	FALSE	FALSE	BUTTERFLY	0	BUTTERFLY	0
cluster10094_1rr.inclade1.ortho2.tre	ME45	ME6	FALSE	FALSE	9.8926	0.765392	9.1272	-8.36181	4.14482	1.20884	2.93598	-1.72713	0.25027	-0.0481738	-0.00301798	DIOX6_ARATH	Probable 2-oxoglutarate-dependent dioxygenase At3g111800 (EC 1.14.11.-)	flavonoid biosynthetic process [GO:0009813]		dioxygenase activity [GO:0051213]; metal ion binding [GO:0046872]	FALSE	TRUE	HUMMINGBIRD	HUMMINGBIRD	HUMMINGBIRD	HUMMINGBIRD
cluster10096_1rr.inclade1.ortho2.tre	ME10	ME13	FALSE	FALSE	28.882	10.1721	18.7099	-8.53773	60.6295	7.97914	52.6504	-44.6712	0.33388	0.158951	-0.00339426	NA	NA	NA	NA	NA	FALSE	FALSE	0	BUTTERFLY	0	BUTTERFLY
cluster10098_1rr.inclade1.ortho2.tre	ME47	ME36	TRUE	FALSE	13.9737	4.24798	9.72573	-5.47775	34.0777	9.80242	24.2753	-14.4729	0.23004	-0.00968147	0.014564	BL1S2_ARATH	Biogenesis of lysosome-related organelles complex 1 subunit 2 (BLOC-1 subunit 2)		BLOC-1 complex [GO:0031083]; endosome [GO:0005768]; intracellular [GO:0005622]	oxidoreductase activity [GO:0016491]	FALSE	FALSE	0	0	0	0
cluster10099_1rr.inclade1.ortho2.tre	ME10	ME13	FALSE	FALSE	20.9906	9.01126	11.9794	-2.96811	58.0836	19.4678	38.6158	-19.1481	0.40306	0.0922941	0.0250897	EIX2_SOLLC	Receptor-like protein EIX2 (EIX receptor 2)	defense response to fungus [GO:0050832]	integral component of membrane [GO:0016021]; plasma membrane [GO:0005886]		FALSE	FALSE	0	BUTTERFLY	0	BUTTERFLY
cluster101_1rr.inclade2.ortho1.tre	ME5	ME22	FALSE	FALSE	16.8525	11.0357	5.81679	5.21895	9.70801	2.20187	7.50613	-5.30426	0.29081	0.073528	0.0374576	IRE_ARATH	Probable serine/threonine protein kinase IRE (EC 2.7.11.1) (Protein INCOMPLETE ROOT HAIR ELONGATION) (AtIRE)	intracellular signal transduction [GO:0035556]; peptidyl-serine phosphorylation [GO:0018105]; regulation of growth [GO:0040008]; unidimensional cell growth [GO:0009826]	intracellular [GO:0005622]	ATP binding [GO:0005524]; kinase activity [GO:0016301]; metal ion binding [GO:0046872]; protein serine/threonine kinase activity [GO:0004674]	FALSE	FALSE	HUMMINGBIRD	HUMMINGBIRD	HUMMINGBIRD	HUMMINGBIRD
cluster101_1rr.inclade3.ortho1.tre	ME0	ME51	FALSE	FALSE	6.32026	4.0632	2.25706	1.80614	7.28239	1.13908	6.14331	-5.00423	0.13425	-0.0144562	-0.00169246	IRE4_ARATH	Probable serine/threonine protein kinase IRE4 (AtIRE4) (EC 2.7.11.1)	intracellular signal transduction [GO:0035556]; peptidyl-serine phosphorylation [GO:0018105]	intracellular [GO:0005622]	ATP binding [GO:0005524]; metal ion binding [GO:0046872]; protein serine/threonine kinase activity [GO:0004674]	FALSE	FALSE	0	0	0	0
cluster1010_1rr.inclade1.ortho2.tre	ME15	ME5	FALSE	FALSE	2.15655	0.630916	1.52564	-0.894723	2.73365	0.866275	1.86737	-1.00109	0.28033	-0.0105001	0.0331411	OBGC2_ORYSJ	Probable GTP-binding protein OBGC2			GTP binding [GO:0005525]	TRUE	TRUE	0	BEE	0	BEE
cluster10102_1rr.inclade1.ortho2.tre	ME5	ME8	TRUE	FALSE	41.4175	31.2997	10.1177	21.182	51.7733	29.795	21.9783	7.81671	0.42756	0.130849	0.0814157	NA	NA	NA	NA	NA	FALSE	FALSE	HUMMINGBIRD	0	HUMMINGBIRD	0
cluster10103_1rr.inclade1.ortho2.tre	ME41	ME4	FALSE	TRUE	22.5343	2.18973	20.3446	-18.1549	10.074	2.42212	7.65185	-5.22973	0.27068	0.0666984	0.0353358	PTR2_ARATH	Protein NRT1/ PTR FAMILY 8.3 (AtNPF8.3) (Histidine-transporting protein) (Peptide transporter PTR2)	dipeptide transport [GO:0042938]; nitrate transport [GO:0015706]; peptide transport [GO:0015833]; protein transport [GO:0015031]; tripeptide transport [GO:0042939]	Golgi apparatus [GO:0005794]; integral component of membrane [GO:0016021]; plant-type vacuole [GO:0000325]; plant-type vacuole membrane [GO:0009705]; vacuolar membrane [GO:0005774]; vacuole [GO:0005773]	high-affinity oligopeptide transmembrane transporter activity [GO:0015334]; tripeptide transmembrane transporter activity [GO:0042937]	FALSE	FALSE	0	0	0	0
cluster10105_1rr.inclade1.ortho1.tre	ME0	ME3	FALSE	FALSE	1.28882	0.363909	0.924908	-0.560999	4.23942	1.3054	2.93403	-1.62863	0.39447	0.0463419	0.0586855	NA	NA	NA	NA	NA	TRUE	TRUE	0	0	0	BUTTERFLY
cluster10107_1rr.inclade1.ortho4.tre	ME18	ME17	TRUE	FALSE	23.4607	14.6663	8.79437	5.87191	34.222	15.9972	18.2248	-2.22756	0.2559	-0.0813724	-0.0188245	NA	NA	NA	NA	NA	FALSE	FALSE	BUTTERFLY	BUTTERFLY	BUTTERFLY	BUTTERFLY
cluster10108_1rr.inclade1.ortho2.tre	ME25	ME23	FALSE	FALSE	22.1577	6.11465	16.0431	-9.92843	22.7651	6.91159	15.8535	-8.94192	0.53275	0.168742	-0.0432303	MB3R2_ORYSJ	Transcription factor MYB3R-2 (Myb-related protein MYB3R-2) (OsMYB3R-2)	cell differentiation [GO:0030154]; positive regulation of response to salt stress [GO:1901002]; positive regulation of response to water deprivation [GO:1902584]; positive regulation of transcription, DNA-templated [GO:0045893]; regulation of transcription by RNA polymerase II [GO:0006357]; response to cold [GO:0009409]; transcription, DNA-templated [GO:0006351]	nucleus [GO:0005634]	RNA polymerase II transcription factor activity, sequence-specific DNA binding [GO:0000981]; sequence-specific DNA binding [GO:0043565]; transcription factor activity, RNA polymerase II transcription factor recruiting [GO:0001135]; transcription regulatory region DNA binding [GO:0044212]	FALSE	FALSE	BUTTERFLY	BUTTERFLY	BUTTERFLY	BUTTERFLY
cluster1011_1rr.inclade1.ortho10.tre	ME4	ME33	FALSE	FALSE	10.1087	1.75455	8.35419	-6.59964	18.4062	0.720577	17.6856	-16.965	0.26176	0.0570313	-0.0841757	COI1_ARATH	Coronatine-insensitive protein 1 (COI-1) (F-box/LRR-repeat protein 2) (AtCOI1) (AtFBL2)	anther dehiscence [GO:0009901]; defense response [GO:0006952]; defense response to bacterium [GO:0042742]; defense response to fungus [GO:0050832]; jasmonic acid and ethylene-dependent systemic resistance [GO:0009861]; jasmonic acid mediated signaling pathway [GO:0009867]; negative regulation of defense response [GO:0031348]; protein ubiquitination [GO:0016567]; regulation of flower development […			FALSE	FALSE	0	0	0	0
cluster1011_1rr.inclade2.ortho4.tre	ME2	ME3	FALSE	FALSE	8.65058	4.63739	4.01319	0.624201	18.8201	8.59443	10.2256	-1.6312	0.23541	-0.0274214	0.0411085	COI1_ARATH	Coronatine-insensitive protein 1 (COI-1) (F-box/LRR-repeat protein 2) (AtCOI1) (AtFBL2)	anther dehiscence [GO:0009901]; defense response [GO:0006952]; defense response to bacterium [GO:0042742]; defense response to fungus [GO:0050832]; jasmonic acid and ethylene-dependent systemic resistance [GO:0009861]; jasmonic acid mediated signaling pathway [GO:0009867]; negative regulation of defense response [GO:0031348]; protein ubiquitination [GO:0016567]; regulation of flower development […			FALSE	FALSE	0	0	0	BUTTERFLY
cluster10111_1rr.inclade1.ortho2.tre	ME10	ME3	FALSE	FALSE	48.9618	15.7126	33.2493	-17.5367	84.744	43.9738	40.7702	3.20367	0.16296	0.112695	0.0574353	C3H29_ARATH	Zinc finger CCCH domain-containing protein 29 (AtC3H29) (AtSZF2)	defense response to fungus [GO:0050832]; regulation of transcription, DNA-templated [GO:0006355]; response to chitin [GO:0010200]; response to cold [GO:0009409]	nucleus [GO:0005634]	DNA binding [GO:0003677]; DNA-binding transcription factor activity [GO:0003700]; metal ion binding [GO:0046872]	FALSE	FALSE	0	0	0	BUTTERFLY
cluster10112_1rr.inclade1.ortho1.tre	ME1	ME1	FALSE	TRUE	31.0056	18.3374	12.6682	5.66916	39.913	27.6672	12.2459	15.4213	0.19612	-0.048432	0.0164894	NA	NA	NA	NA	NA	FALSE	FALSE	0	0	0	0
cluster10114_1rr.inclade1.ortho1.tre	ME1	ME1	FALSE	FALSE	37.3641	23.901	13.4631	10.4379	79.0119	47.2671	31.7447	15.5224	0.16793	-0.0650227	-0.100582	SAP5_ARATH	Zinc finger A20 and AN1 domain-containing stress-associated protein 5 (AtSAP5)	protein autoubiquitination [GO:0051865]; protein ubiquitination [GO:0016567]; response to osmotic stress [GO:0006970]; response to water deprivation [GO:0009414]	nucleus [GO:0005634]	DNA binding [GO:0003677]; ubiquitin-protein transferase activity [GO:0004842]; zinc ion binding [GO:0008270]	FALSE	FALSE	0	0	0	0
cluster10118_1rr.inclade1.ortho2.tre	ME24	ME16	FALSE	FALSE	46.448	9.76439	36.6836	-26.9192	47.9706	13.8453	34.1253	-20.28	0.32544	-0.0355735	-0.0472907	NA	NA	NA	NA	NA	FALSE	FALSE	0	0	0	0
cluster10120_1rr.inclade1.ortho2.tre	ME14	ME6	FALSE	FALSE	26.2792	10.4651	15.8141	-5.34904	57.5483	34.3434	23.2049	11.1385	0.2121	-0.0118986	-0.00438082	NA	NA	NA	NA	NA	FALSE	FALSE	HUMMINGBIRD	HUMMINGBIRD	HUMMINGBIRD	HUMMINGBIRD
cluster10121_1rr.inclade1.ortho4.tre	ME5	ME24	TRUE	FALSE	34.1434	25.3889	8.75456	16.6343	13.556	3.33987	10.2161	-6.87628	0.54836	0.0836747	0.0666001	NA	NA	NA	NA	NA	FALSE	FALSE	HUMMINGBIRD	HUMMINGBIRD	HUMMINGBIRD	HUMMINGBIRD
cluster10123_1rr.inclade1.ortho3.tre	ME1	ME2	FALSE	FALSE	49.394	35.3478	14.0463	21.3015	67.9281	16.2566	51.6715	-35.4149	0.2856	-0.0364542	-0.0470998	GEM_ARATH	GLABRA2 expression modulator	histone H3-K9 methylation [GO:0051567]; regulation of epidermal cell division [GO:0010482]; root hair cell differentiation [GO:0048765]; trichome differentiation [GO:0010026]	cytosol [GO:0005829]		FALSE	FALSE	0	0	0	BEE
cluster10124_1rr.inclade1.ortho2.tre	ME1	ME1	FALSE	FALSE	8.45721	3.83282	4.62439	-0.791574	30.9955	15.9381	15.0574	0.88077	0.40236	-0.109808	-0.055975	PP218_ARATH	Pentatricopeptide repeat-containing protein At3g07290, mitochondrial	RNA modification [GO:0009451]	intracellular membrane-bounded organelle [GO:0043231]; mitochondrion [GO:0005739]	endonuclease activity [GO:0004519]; RNA binding [GO:0003723]	FALSE	FALSE	0	0	0	0
cluster10124_1rr.inclade1.ortho2.tre	ME1	ME1	FALSE	FALSE	8.45721	3.83282	4.62439	-0.791574	30.9955	15.9381	15.0574	0.88077	0.40236	-0.109808	-0.055975	PP218_ARATH	Pentatricopeptide repeat-containing protein At3g07290, mitochondrial	RNA modification [GO:0009451]	intracellular membrane-bounded organelle [GO:0043231]; mitochondrion [GO:0005739]	endonuclease activity [GO:0004519]; RNA binding [GO:0003723]	FALSE	FALSE	0	0	0	0
cluster10124_1rr.inclade1.ortho2.tre	ME1	ME1	FALSE	FALSE	8.45721	3.83282	4.62439	-0.791574	30.9955	15.9381	15.0574	0.88077	0.40236	-0.109808	-0.055975	PP218_ARATH	Pentatricopeptide repeat-containing protein At3g07290, mitochondrial	RNA modification [GO:0009451]	intracellular membrane-bounded organelle [GO:0043231]; mitochondrion [GO:0005739]	endonuclease activity [GO:0004519]; RNA binding [GO:0003723]	FALSE	FALSE	0	0	0	0
cluster10124_1rr.inclade1.ortho2.tre	ME1	ME1	FALSE	FALSE	8.45721	3.83282	4.62439	-0.791574	30.9955	15.9381	15.0574	0.88077	0.40236	-0.109808	-0.055975	PP218_ARATH	Pentatricopeptide repeat-containing protein At3g07290, mitochondrial	RNA modification [GO:0009451]	intracellular membrane-bounded organelle [GO:0043231]; mitochondrion [GO:0005739]	endonuclease activity [GO:0004519]; RNA binding [GO:0003723]	FALSE	FALSE	0	0	0	0
cluster10124_1rr.inclade1.ortho2.tre	ME1	ME1	FALSE	FALSE	8.45721	3.83282	4.62439	-0.791574	30.9955	15.9381	15.0574	0.88077	0.40236	-0.109808	-0.055975	PP218_ARATH	Pentatricopeptide repeat-containing protein At3g07290, mitochondrial	RNA modification [GO:0009451]	intracellular membrane-bounded organelle [GO:0043231]; mitochondrion [GO:0005739]	endonuclease activity [GO:0004519]; RNA binding [GO:0003723]	FALSE	FALSE	0	0	0	0
cluster10124_1rr.inclade1.ortho2.tre	ME1	ME1	FALSE	FALSE	8.45721	3.83282	4.62439	-0.791574	30.9955	15.9381	15.0574	0.88077	0.40236	-0.109808	-0.055975	PP218_ARATH	Pentatricopeptide repeat-containing protein At3g07290, mitochondrial	RNA modification [GO:0009451]	intracellular membrane-bounded organelle [GO:0043231]; mitochondrion [GO:0005739]	endonuclease activity [GO:0004519]; RNA binding [GO:0003723]	FALSE	FALSE	0	0	0	0
cluster10124_1rr.inclade1.ortho2.tre	ME1	ME1	FALSE	FALSE	8.45721	3.83282	4.62439	-0.791574	30.9955	15.9381	15.0574	0.88077	0.40236	-0.109808	-0.055975	PP218_ARATH	Pentatricopeptide repeat-containing protein At3g07290, mitochondrial	RNA modification [GO:0009451]	intracellular membrane-bounded organelle [GO:0043231]; mitochondrion [GO:0005739]	endonuclease activity [GO:0004519]; RNA binding [GO:0003723]	FALSE	FALSE	0	0	0	0
cluster10124_1rr.inclade1.ortho2.tre	ME1	ME1	FALSE	FALSE	8.45721	3.83282	4.62439	-0.791574	30.9955	15.9381	15.0574	0.88077	0.40236	-0.109808	-0.055975	PP218_ARATH	Pentatricopeptide repeat-containing protein At3g07290, mitochondrial	RNA modification [GO:0009451]	intracellular membrane-bounded organelle [GO:0043231]; mitochondrion [GO:0005739]	endonuclease activity [GO:0004519]; RNA binding [GO:0003723]	FALSE	FALSE	0	0	0	0
cluster10125_1rr.inclade1.ortho2.tre	ME0	ME18	FALSE	FALSE	0.748865	0.372358	0.376507	-0.0041485	8.35556	1.31235	7.04321	-5.73086	0.31362	0.019496	-0.0361993	NA	NA	NA	NA	NA	TRUE	FALSE	0	HUMMINGBIRD	0	HUMMINGBIRD
cluster10127_1rr.inclade1.ortho6.tre	ME11	ME60	FALSE	FALSE	17.2743	7.30661	9.96767	-2.66106	31.855	2.25949	29.5956	-27.3361	0.55149	0.0775825	0.000792004	CID12_ARATH	Polyadenylate-binding protein-interacting protein 12 (PABP-interacting protein 12) (Poly(A)-binding protein-interacting protein 12) (PAM2-containing protein CID12) (Protein CTC-INTERACTING DOMAIN 12) (RNA-binding protein 37) (AtRBP37)		nucleus [GO:0005634]	nucleotide binding [GO:0000166]; RNA binding [GO:0003723]	FALSE	FALSE	0	0	0	0
cluster10128_1rr.inclade1.ortho1.tre	ME23	ME12	FALSE	TRUE	17.8987	5.73262	12.166	-6.43341	27.6733	12.2137	15.4597	-3.24599	0.32466	0.0310909	0.0816726	P4KG1_ARATH	Phosphatidylinositol 4-kinase gamma 1 (AtPI4Kgamma1) (PI-4Kgamma1) (PI4K gamma 1) (EC 2.7.1.67)			1-phosphatidylinositol 4-kinase activity [GO:0004430]; ATP binding [GO:0005524]	FALSE	FALSE	BUTTERFLY	BUTTERFLY	BUTTERFLY	BUTTERFLY
cluster10129_1rr.inclade1.ortho2.tre	ME3	ME2	FALSE	FALSE	53.8842	34.4626	19.4216	15.0411	83.004	74.4848	8.5192	65.9656	0.41272	-0.0493024	-0.0359457	RHY1A_ARATH	Probable E3 ubiquitin-protein ligase RHY1A (EC 2.3.2.27) (RING-H2 finger Y1a) (RING-H2 zinc finger protein RHY1a) (RING-type E3 ubiquitin transferase RHY1A)	proteasome-mediated ubiquitin-dependent protein catabolic process [GO:0043161]		metal ion binding [GO:0046872]; ubiquitin protein ligase activity [GO:0061630]	FALSE	FALSE	0	0	BEE	BEE
cluster1013_1rr.inclade1.ortho9.tre	ME35	ME9	FALSE	FALSE	3.14142	0.240886	2.90054	-2.65965	13.2601	4.13774	9.12233	-4.98459	0.22998	-0.0481821	-0.00779823	TIR1_ARATH	Protein TRANSPORT INHIBITOR RESPONSE 1 (Weak ethylene-insensitive protein 1)	auxin-activated signaling pathway [GO:0009734]; cell cycle [GO:0007049]; cellular response to phosphate starvation [GO:0016036]; defense response [GO:0006952]; ethylene-activated signaling pathway [GO:0009873]; lateral root formation [GO:0010311]; pollen maturation [GO:0010152]; response to auxin [GO:0009733]; stamen development [GO:0048443]	nucleus [GO:0005634]; SCF ubiquitin ligase complex [GO:0019005]	auxin binding [GO:0010011]; auxin receptor activity [GO:0038198]; inositol hexakisphosphate binding [GO:0000822]; ubiquitin-protein transferase activity [GO:0004842]	FALSE	FALSE	0	0	0	0
cluster1013_1rr.inclade2.ortho2.tre	ME60	ME24	TRUE	FALSE	9.00558	3.23401	5.77157	-2.53757	14.2397	2.29623	11.9435	-9.64724	0.1169	-0.0721112	0.0215286	TIR1_ARATH	Protein TRANSPORT INHIBITOR RESPONSE 1 (Weak ethylene-insensitive protein 1)	auxin-activated signaling pathway [GO:0009734]; cell cycle [GO:0007049]; cellular response to phosphate starvation [GO:0016036]; defense response [GO:0006952]; ethylene-activated signaling pathway [GO:0009873]; lateral root formation [GO:0010311]; pollen maturation [GO:0010152]; response to auxin [GO:0009733]; stamen development [GO:0048443]	nucleus [GO:0005634]; SCF ubiquitin ligase complex [GO:0019005]	auxin binding [GO:0010011]; auxin receptor activity [GO:0038198]; inositol hexakisphosphate binding [GO:0000822]; ubiquitin-protein transferase activity [GO:0004842]	FALSE	FALSE	0	HUMMINGBIRD	0	HUMMINGBIRD
cluster10132_1rr.inclade1.ortho1.tre	ME13	ME11	FALSE	TRUE	5.54093	2.51287	3.02806	-0.515188	5.07831	1.02524	4.05307	-3.02783	0.36209	0.0691091	0.0236488	Y3351_ARATH	BTB/POZ domain-containing protein At3g03510	protein ubiquitination [GO:0016567]			FALSE	FALSE	HUMMINGBIRD	HUMMINGBIRD	HUMMINGBIRD	HUMMINGBIRD
cluster10132_1rr.inclade2.ortho1.tre	ME0	ME0	FALSE	FALSE	4.38122	2.18567	2.19555	-0.00988562	2.30741	0.224501	2.08291	-1.85841	0.42412	0.0271108	0.019953	Y5758_ARATH	BTB/POZ domain-containing protein At5g17580	protein ubiquitination [GO:0016567]			FALSE	TRUE	0	0	0	0
cluster10135_1rr.inclade1.ortho2.tre	ME2	ME1	FALSE	FALSE	22.0121	16.2199	5.79223	10.4276	8.22443	3.14425	5.08018	-1.93594	0.27327	-0.0248255	0.0240084	PP328_ARATH	Pentatricopeptide repeat-containing protein At4g20740	RNA modification [GO:0009451]	intracellular membrane-bounded organelle [GO:0043231]	endonuclease activity [GO:0004519]; RNA binding [GO:0003723]	FALSE	FALSE	0	0	0	0
cluster10136_1rr.inclade1.ortho1.tre	ME20	ME11	FALSE	TRUE	8.65333	1.72754	6.92579	-5.19824	6.83681	1.26166	5.57515	-4.31348	0.49081	-0.0100476	-0.0115327	MBD5_ARATH	Methyl-CpG-binding domain-containing protein 5 (AtMBD5) (MBD05) (Methyl-CpG-binding protein MBD5)	regulation of transcription, DNA-templated [GO:0006355]; transcription, DNA-templated [GO:0006351]	nuclear heterochromatin [GO:0005720]; nucleus [GO:0005634]; perinucleolar chromocenter [GO:0010370]	enzyme binding [GO:0019899]; methyl-CpG binding [GO:0008327]; protein self-association [GO:0043621]	FALSE	FALSE	HUMMINGBIRD	HUMMINGBIRD	HUMMINGBIRD	HUMMINGBIRD
cluster10137_1rr.inclade1.ortho6.tre	ME5	ME0	FALSE	FALSE	3.97257	1.7154	2.25716	-0.541756	3.10962	0.185391	2.92423	-2.73884	0.35275	0.055771	0.0395184	NA	NA	NA	NA	NA	FALSE	TRUE	HUMMINGBIRD	0	HUMMINGBIRD	0
cluster10139_1rr.inclade1.ortho4.tre	ME61	ME42	FALSE	FALSE	14.2079	1.73545	12.4725	-10.737	21.7272	3.57904	18.1482	-14.5691	0.05918	0.014843	-0.0776188	NA	NA	NA	NA	NA	FALSE	FALSE	0	0	BEE	0
cluster10140_1rr.inclade1.ortho2.tre	ME8	ME26	FALSE	TRUE	15.683	3.85318	11.8299	-7.97668	36.2184	11.2937	24.9247	-13.631	0.31115	-0.0426127	0.0210244	NA	NA	NA	NA	NA	FALSE	FALSE	0	0	0	HUMMINGBIRD
cluster10143_1rr.inclade1.ortho6.tre	ME8	ME21	FALSE	FALSE	13.6303	6.61443	7.01592	-0.401494	22.1335	2.34927	19.7842	-17.4349	0.40713	0.00286329	-0.0610582	NA	NA	NA	NA	NA	FALSE	FALSE	0	HUMMINGBIRD	0	HUMMINGBIRD
cluster10145_1rr.inclade1.ortho2.tre	ME2	ME0	FALSE	FALSE	5.52347	2.4213	3.10218	-0.680881	2.14225	0.407946	1.73431	-1.32636	0.64574	-0.118361	-0.0431941	NA	NA	NA	NA	NA	FALSE	TRUE	0	0	0	0
cluster10147_1rr.inclade1.ortho1.tre	ME62	ME4	FALSE	FALSE	3.39999	0.218694	3.1813	-2.9626	7.02813	1.78513	5.243	-3.45787	0.32147	0.0339402	0.004593	TSJT1_TOBAC	Stem-specific protein TSJT1				FALSE	FALSE	0	0	0	0
cluster10147_2rr.inclade1.ortho3.tre	ME5	ME3	FALSE	FALSE	25.575	2.79506	22.78	-19.9849	97.175	62.349	34.826	27.523	0.35848	0.085823	0.0432935	TSJT1_TOBAC	Stem-specific protein TSJT1				FALSE	FALSE	HUMMINGBIRD	0	HUMMINGBIRD	BUTTERFLY
cluster10148_1rr.inclade1.ortho4.tre	ME0	ME15	FALSE	FALSE	4.03252	0.268221	3.7643	-3.49608	3.41364	0.805409	2.60823	-1.80282	0.31624	-0.00084352	0.00741391	NA	NA	NA	NA	NA	FALSE	TRUE	0	0	0	0
cluster10149_1rr.inclade1.ortho1.tre	ME23	ME12	FALSE	TRUE	14.5072	4.54238	9.96481	-5.42243	37.0004	14.3519	22.6485	-8.29664	0.35507	0.0541134	0.066871	NA	NA	NA	NA	NA	FALSE	FALSE	BUTTERFLY	BUTTERFLY	BUTTERFLY	BUTTERFLY
cluster1015_1rr.inclade1.ortho16.tre	ME21	ME1	FALSE	FALSE	3.86878	0.63564	3.23314	-2.5975	5.28636	1.59762	3.68874	-2.09112	0.54307	0.00311716	-0.0507042	NBS1_ORYSJ	Nijmegen breakage syndrome 1 protein (OsNbs1)	cellular response to DNA damage stimulus [GO:0006974]; cellular response to ionizing radiation [GO:0071479]; DNA duplex unwinding [GO:0032508]; double-strand break repair via homologous recombination [GO:0000724]; mitotic G2 DNA damage checkpoint [GO:0007095]; mitotic recombination [GO:0006312]; reciprocal meiotic recombination [GO:0007131]; signal transduction in response to DNA damage [GO:00427…	Mre11 complex [GO:0030870]; nuclear chromosome, telomeric region [GO:0000784]; PML body [GO:0016605]	damaged DNA binding [GO:0003684]	FALSE	FALSE	BEE	0	BEE	0
cluster10151_1rr.inclade1.ortho3.tre	ME15	ME3	FALSE	FALSE	27.0787	8.66516	18.4136	-9.7484	73.6739	47.5892	26.0847	21.5045	0.60075	0.0507878	0.112733	NA	NA	NA	NA	NA	FALSE	FALSE	0	0	0	BUTTERFLY
cluster10152_1rr.inclade1.ortho2.tre	ME0	ME0	FALSE	FALSE	1.05596	0.338637	0.717326	-0.378689	1.60979	0.145873	1.46392	-1.31805	0.53696	-0.00175647	-0.0236448	NA	NA	NA	NA	NA	TRUE	TRUE	0	0	0	0
cluster10155_1rr.inclade1.ortho1.tre	ME18	ME9	FALSE	FALSE	20.1466	8.80527	11.3414	-2.5361	32.7803	16.3047	16.4756	-0.170934	0.33479	-0.0525958	0.0256329	VLN5_ORYSJ	Villin-5	actin filament bundle assembly [GO:0051017]; actin filament capping [GO:0051693]; actin filament organization [GO:0007015]; actin filament severing [GO:0051014]	actin filament bundle [GO:0032432]; cytoplasm [GO:0005737]	actin filament binding [GO:0051015]	FALSE	FALSE	BUTTERFLY	0	BUTTERFLY	0
cluster10156_1rr.inclade1.ortho1.tre	ME11	ME27	FALSE	FALSE	2.99131	0.901135	2.09017	-1.18904	5.75136	0.949234	4.80213	-3.85289	0.52098	0.0163254	-0.0761373	FPP7_ARATH	Filament-like plant protein 7 (AtFPP7)				FALSE	FALSE	0	BUTTERFLY	0	BUTTERFLY
cluster10158_1rr.inclade1.ortho1.tre	ME0	ME27	FALSE	FALSE	7.1606	2.35682	4.80378	-2.44695	5.29253	0.784221	4.50831	-3.72409	0.14169	-0.0213509	-0.0656082	SARED_ESCCA	Sanguinarine reductase (EC 1.3.1.107)	response to toxic substance [GO:0009636]		oxidoreductase activity [GO:0016491]	FALSE	FALSE	0	BUTTERFLY	0	BUTTERFLY
cluster10159_1rr.inclade1.ortho1.tre	ME19	ME7	FALSE	FALSE	11.338	1.12322	10.2147	-9.09151	20.0277	4.24332	15.7844	-11.5411	0.19448	0.0524973	0.089749	NA	NA	NA	NA	NA	FALSE	FALSE	0	0	0	0
cluster10160_1rr.inclade1.ortho2.tre	ME22	ME24	FALSE	FALSE	7.64607	1.46489	6.18118	-4.71629	16.2607	2.26039	14.0003	-11.7399	0.50964	0.00314296	0.031928	NA	NA	NA	NA	NA	FALSE	FALSE	HUMMINGBIRD	HUMMINGBIRD	HUMMINGBIRD	HUMMINGBIRD
cluster10161_1rr.inclade1.ortho2.tre	ME9	ME19	FALSE	FALSE	13.6068	3.62784	9.97892	-6.35108	33.8559	5.51548	28.3404	-22.8249	0.32538	0.0146412	-0.0717547	NA	NA	NA	NA	NA	FALSE	FALSE	HUMMINGBIRD	0	HUMMINGBIRD	0
cluster10162_1rr.inclade1.ortho1.tre	ME7	ME12	FALSE	FALSE	49.0897	17.5585	31.5311	-13.9726	61.7782	22.7675	39.0107	-16.2432	0.1775	0.157613	0.00300743	RNG1L_ARATH	E3 ubiquitin-protein ligase RING1-like (EC 2.3.2.27) (RING finger protein 1) (RING-type E3 ubiquitin transferase RING1-like)	proteasome-mediated ubiquitin-dependent protein catabolic process [GO:0043161]; protein polyubiquitination [GO:0000209]		metal ion binding [GO:0046872]; ubiquitin protein ligase activity [GO:0061630]	FALSE	FALSE	0	BUTTERFLY	0	BUTTERFLY
cluster10163_1rr.inclade1.ortho4.tre	ME25	ME23	FALSE	FALSE	25.3908	6.06318	19.3276	-13.2644	9.4538	1.53117	7.92263	-6.39145	0.39568	0.143801	-0.0773292	NA	NA	NA	NA	NA	FALSE	FALSE	BUTTERFLY	BUTTERFLY	BUTTERFLY	BUTTERFLY
cluster10164_1rr.inclade1.ortho2.tre	ME11	ME26	FALSE	FALSE	5.59458	1.71418	3.8804	-2.16622	17.2252	4.58729	12.6379	-8.0506	0.22901	0.0516488	0.0312578	TM16B_ARATH	Mitochondrial import inner membrane translocase subunit PAM16 like 2 (AtPAM16) (AtPAM16L2) (Presequence translocated-associated motor subunit PAM16) (Protein MUTANT SNC1-ENHANCING 5) (Protein THAXTOMIN A RESISTANT 1)	auxin-activated signaling pathway [GO:0009734]; defense response [GO:0006952]; negative regulation of defense response [GO:0031348]; negative regulation of defense response to bacterium [GO:1900425]; negative regulation of defense response to oomycetes [GO:1902289]; negative regulation of reactive oxygen species metabolic process [GO:2000378]; positive regulation of toxin transport [GO:1902009]; …	cytoplasm [GO:0005737]; mitochondrial inner membrane [GO:0005743]; mitochondrial inner membrane presequence translocase complex [GO:0005744]; mitochondrion [GO:0005739]		FALSE	FALSE	0	0	0	HUMMINGBIRD
cluster10165_1rr.inclade1.ortho2.tre	ME10	ME3	FALSE	FALSE	34.6332	13.7565	20.8767	-7.12018	45.363	13.6729	31.6902	-18.0173	0.12759	0.0431845	0.0616988	BETL1_ARATH	Bet1-like protein At4g14600	protein transport [GO:0015031]; vesicle-mediated transport [GO:0016192]	endoplasmic reticulum membrane [GO:0005789]; Golgi membrane [GO:0000139]; integral component of membrane [GO:0016021]; plasma membrane [GO:0005886]		FALSE	FALSE	0	0	0	BUTTERFLY
cluster10167_1rr.inclade1.ortho1.tre	ME0	ME7	FALSE	FALSE	3.30058	0.776617	2.52396	-1.74734	8.81735	1.49797	7.31937	-5.8214	0.31374	-0.0168642	0.0163127	NA	NA	NA	NA	NA	FALSE	FALSE	0	0	0	0
cluster10167_2rr.inclade1.ortho1.tre	ME4	ME0	FALSE	FALSE	59.4026	23.6266	35.776	-12.1494	3.84819	0.522388	3.3258	-2.80341	0.26086	0.0592122	0.0432225	NA	NA	NA	NA	NA	FALSE	TRUE	0	0	0	0
cluster10167_2rr.inclade1.ortho2.tre	ME10	ME7	FALSE	FALSE	19.3458	6.5362	12.8096	-6.2734	31.4669	13.3512	18.1157	-4.76445	0.25384	0.0864544	0.0727169	NA	NA	NA	NA	NA	FALSE	FALSE	0	0	0	0
cluster10168_1rr.inclade1.ortho2.tre	ME24	ME33	FALSE	FALSE	17.3592	3.13717	14.222	-11.0848	13.503	2.75951	10.7435	-7.98402	0.18894	-0.0856203	0.00567847	PHSB_ARATH	Probable polyamine transporter At1g31830	polyamine transport [GO:0015846]	integral component of plasma membrane [GO:0005887]	antiporter activity [GO:0015297]; L-amino acid transmembrane transporter activity [GO:0015179]; polyamine transmembrane transporter activity [GO:0015203]; symporter activity [GO:0015293]	FALSE	FALSE	0	0	0	0
cluster10169_1rr.inclade1.ortho2.tre	ME31	ME9	FALSE	FALSE	21.4387	2.56065	18.878	-16.3173	12.2652	4.97848	7.28674	-2.30826	0.24871	-0.0121494	0.0318934	NA	NA	NA	NA	NA	FALSE	FALSE	0	0	0	0
cluster10169_1rr.inclade2.ortho1.tre	ME13	ME18	FALSE	FALSE	22.2172	5.15637	17.0608	-11.9044	15.3969	2.86504	12.5319	-9.66681	0.18914	0.0781239	0.0151244	NA	NA	NA	NA	NA	FALSE	FALSE	HUMMINGBIRD	HUMMINGBIRD	HUMMINGBIRD	HUMMINGBIRD
cluster10170_1rr.inclade1.ortho2.tre	ME18	ME0	FALSE	FALSE	10.8014	5.38384	5.4176	-0.033766	7.55807	0.641202	6.91687	-6.27567	0.19506	-0.06363	-0.0101001	RER1_ARATH	Protein RETICULATA-RELATED 1, chloroplastic	multicellular organism development [GO:0007275]	chloroplast envelope [GO:0009941]; chloroplast inner membrane [GO:0009706]; integral component of membrane [GO:0016021]; mitochondrion [GO:0005739]; plastid [GO:0009536]		FALSE	FALSE	BUTTERFLY	0	BUTTERFLY	0
cluster10173_1rr.inclade1.ortho1.tre	ME12	ME0	FALSE	FALSE	18.4337	4.50053	13.9332	-9.43262	27.5299	3.1205	24.4093	-21.2888	0.13591	0.104643	0.000126646	RS16_GOSHI	40S ribosomal protein S16	translation [GO:0006412]	ribosome [GO:0005840]	structural constituent of ribosome [GO:0003735]	FALSE	FALSE	0	0	0	0
cluster10175_1rr.inclade1.ortho1.tre	ME3	ME2	FALSE	FALSE	7.7188	3.135	4.5838	-1.44881	14.4576	6.27675	8.18087	-1.90412	0.0687	-0.0345487	0.0316066	AN32_ARATH	Acidic leucine-rich nuclear phosphoprotein 32-related protein (ANP32/acidic nuclear phosphoprotein-like protein)	histone exchange [GO:0043486]; nucleocytoplasmic transport [GO:0006913]; nucleosome assembly [GO:0006334]	nucleus [GO:0005634]	histone binding [GO:0042393]	FALSE	FALSE	0	0	BEE	BEE
cluster10177_1rr.inclade1.ortho1.tre	ME4	ME21	FALSE	FALSE	24.913	7.0294	17.8836	-10.8542	13.7456	3.35725	10.3883	-7.03108	0.16497	0.0719375	0.0418243	ML423_ARATH	MLP-like protein 423	defense response [GO:0006952]; response to biotic stimulus [GO:0009607]	membrane [GO:0016020]		FALSE	FALSE	0	HUMMINGBIRD	0	HUMMINGBIRD
cluster10179_1rr.inclade1.ortho1.tre	ME0	ME0	FALSE	FALSE	2.8798	0.534927	2.34487	-1.80995	2.46059	0.354116	2.10647	-1.75236	0.54474	0.0112398	0.00782433	MYB73_ARATH	Transcription factor MYB73 (Myb-related protein 73) (AtMYB73)	cell differentiation [GO:0030154]; glucosinolate metabolic process [GO:0019760]; negative regulation of response to salt stress [GO:1901001]; positive regulation of auxin mediated signaling pathway [GO:0010929]; regulation of transcription, DNA-templated [GO:0006355]; regulation of transcription by RNA polymerase II [GO:0006357]; response to abscisic acid [GO:0009737]; response to cadmium ion [GO…	nucleus [GO:0005634]	DNA-binding transcription factor activity [GO:0003700]; RNA polymerase II transcription factor activity, sequence-specific DNA binding [GO:0000981]; sequence-specific DNA binding [GO:0043565]; transcription factor activity, RNA polymerase II transcription factor recruiting [GO:0001135]; transcription regulatory region DNA binding [GO:0044212]	FALSE	TRUE	0	0	0	0
cluster10180_1rr.inclade1.ortho3.tre	ME16	ME17	TRUE	FALSE	22.8049	14.4123	8.39266	6.01961	43.9567	15.4141	28.5426	-13.1284	0.53669	0.0725858	0.0159764	H12_ARATH	Histone H1.2	nucleosome assembly [GO:0006334]	mitochondrion [GO:0005739]; nucleolus [GO:0005730]; nucleosome [GO:0000786]	DNA binding [GO:0003677]	FALSE	FALSE	BUTTERFLY	BUTTERFLY	BUTTERFLY	BUTTERFLY
cluster10181_1rr.inclade1.ortho1.tre	ME11	ME4	FALSE	FALSE	13.1081	3.4583	9.64983	-6.19152	29.5291	12.9128	16.6163	-3.70355	0.21705	0.0778931	-0.0427055	NA	NA	NA	NA	NA	FALSE	FALSE	0	0	0	0
cluster10181_2rr.inclade1.ortho3.tre	ME13	ME11	FALSE	FALSE	8.80864	4.23063	4.57801	-0.347372	15.7668	5.52907	10.2377	-4.70865	0.14196	0.0549954	-0.0140369	NA	NA	NA	NA	NA	FALSE	FALSE	HUMMINGBIRD	HUMMINGBIRD	HUMMINGBIRD	HUMMINGBIRD
cluster10184_1rr.inclade1.ortho2.tre	ME10	ME0	FALSE	FALSE	7.37609	1.33248	6.04361	-4.71113	2.84627	0.649614	2.19666	-1.54705	0.34961	0.185859	0.0501784	2MMP_ARATH	Metalloendoproteinase 2-MMP (At2-MMP) (EC 3.4.24.-)	developmental vegetative growth [GO:0080186]; multicellular organism development [GO:0007275]; negative regulation of leaf senescence [GO:1900056]; regulation of photoperiodism, flowering [GO:2000028]; response to cadmium ion [GO:0046686]; response to jasmonic acid [GO:0009753]; response to salt stress [GO:0009651]	anchored component of membrane [GO:0031225]; extracellular matrix [GO:0031012]; plasma membrane [GO:0005886]	metalloendopeptidase activity [GO:0004222]; zinc ion binding [GO:0008270]	FALSE	TRUE	0	0	0	0
cluster10184_1rr.inclade2.ortho1.tre	ME30	ME25	FALSE	FALSE	15.6872	1.59986	14.0873	-12.4874	23.6614	4.15178	19.5096	-15.3579	0.32565	0.13957	0.0440706	3MMP_ARATH	Metalloendoproteinase 3-MMP (At3-MMP) (EC 3.4.24.-)		anchored component of membrane [GO:0031225]; extracellular matrix [GO:0031012]; plasma membrane [GO:0005886]	metalloendopeptidase activity [GO:0004222]; zinc ion binding [GO:0008270]	FALSE	FALSE	0	0	HUMMINGBIRD	0
cluster10185_1rr.inclade1.ortho2.tre	ME0	ME46	FALSE	FALSE	1.37577	0.243906	1.13187	-0.88796	11.0228	2.81031	8.21248	-5.40217	0.15329	-0.0210963	-0.129637	ASOL_TOBAC	L-ascorbate oxidase homolog (EC 1.10.3.-) (Pollen-specific protein NTP303)		extracellular space [GO:0005615]	copper ion binding [GO:0005507]; oxidoreductase activity [GO:0016491]	TRUE	FALSE	0	HUMMINGBIRD	0	HUMMINGBIRD
cluster10187_1rr.inclade1.ortho2.tre	ME50	ME10	TRUE	FALSE	9.38813	2.6453	6.74283	-4.09753	17.4217	5.01598	12.4057	-7.38976	0.18038	0.021745	-0.0922232	BGL44_ARATH	Beta-glucosidase 44 (AtBGLU44) (EC 3.2.1.21)	carbohydrate metabolic process [GO:0005975]; glycosyl compound metabolic process [GO:1901657]	cell wall [GO:0005618]; cytosolic ribosome [GO:0022626]; extracellular region [GO:0005576]; plant-type cell wall [GO:0009505]	4-methylumbelliferyl-beta-D-glucopyranoside beta-glucosidase activity [GO:0080081]; amygdalin beta-glucosidase activity [GO:0047668]; beta-gentiobiose beta-glucosidase activity [GO:0080083]; beta-glucosidase activity [GO:0008422]; beta-mannosidase activity [GO:0004567]; cellobiose glucosidase activity [GO:0080079]; esculin beta-glucosidase activity [GO:0080082]; metal ion binding [GO:0046872]; sc…	FALSE	FALSE	0	0	0	0
cluster10188_1rr.inclade1.ortho1.tre	ME2	ME3	FALSE	FALSE	4.69331	2.1447	2.54861	-0.403908	8.6546	3.41374	5.24085	-1.82711	0.3769	-0.0241551	0.0634351	MYOB2_ARATH	Myosin-binding protein 2		integral component of membrane [GO:0016021]; transport vesicle [GO:0030133]	myosin binding [GO:0017022]	FALSE	FALSE	0	0	0	BUTTERFLY
cluster1019_1rr.inclade1.ortho3.tre	ME0	ME18	FALSE	FALSE	9.46874	1.42275	8.04598	-6.62323	16.3038	4.12669	12.1771	-8.05042	0.40861	0.0553336	0.0299841	CB60A_ARATH	Calmodulin-binding protein 60 A	negative regulation of defense response to bacterium, incompatible interaction [GO:1902478]; regulation of transcription, DNA-templated [GO:0006355]; response to stress [GO:0006950]; transcription, DNA-templated [GO:0006351]	nucleus [GO:0005634]	calmodulin binding [GO:0005516]; DNA binding [GO:0003677]	FALSE	FALSE	0	HUMMINGBIRD	0	HUMMINGBIRD
cluster10190_1rr.inclade1.ortho3.tre	ME27	ME5	FALSE	TRUE	21.7586	4.62778	17.1308	-12.503	32.4977	15.7175	16.7802	-1.06278	0.08904	-0.0459844	-0.0759879	RPT3_ARATH	Root phototropism protein 3 (BTB/POZ domain-containing protein RPT3) (Non-phototropic hypocotyl protein 3)	phototropism [GO:0009638]; protein ubiquitination [GO:0016567]; signal transduction [GO:0007165]	plasma membrane [GO:0005886]		FALSE	FALSE	BEE	BEE	BEE	BEE
cluster10191_1rr.inclade2.ortho1.tre	ME8	ME4	FALSE	FALSE	15.0374	6.16341	8.87402	-2.71061	27.9977	12.0393	15.9585	-3.91919	0.37086	-0.00853439	0.0172394	GDL57_ARATH	GDSL esterase/lipase At3g48460 (EC 3.1.1.-) (Extracellular lipase At3g48460)	fatty acid metabolic process [GO:0006631]; lipid catabolic process [GO:0016042]	extracellular region [GO:0005576]	acetylesterase activity [GO:0008126]	FALSE	FALSE	0	0	0	0
cluster10192_1rr.inclade1.ortho5.tre	ME0	ME21	FALSE	FALSE	3.18563	0.859888	2.32575	-1.46586	8.98125	1.81175	7.1695	-5.35776	0.28042	-0.0833289	0.0319231	NA	NA	NA	NA	NA	FALSE	FALSE	0	HUMMINGBIRD	0	HUMMINGBIRD
cluster10193_1rr.inclade1.ortho1.tre	ME32	ME20	FALSE	FALSE	8.21211	1.25493	6.95719	-5.70226	20.0384	3.58578	16.4526	-12.8669	0.16166	0.0816544	0.0620554	PYL8_ARATH	Abscisic acid receptor PYL8 (ABI1-binding protein 1) (PYR1-like protein 8) (Regulatory components of ABA receptor 3)	abscisic acid-activated signaling pathway [GO:0009738]; positive regulation of abscisic acid-activated signaling pathway [GO:0009789]; response to abscisic acid [GO:0009737]	cytoplasm [GO:0005737]; nucleus [GO:0005634]; plasma membrane [GO:0005886]	abscisic acid binding [GO:0010427]; protein homodimerization activity [GO:0042803]; protein phosphatase inhibitor activity [GO:0004864]; signaling receptor activity [GO:0038023]	FALSE	FALSE	0	0	0	0
cluster10195_1rr.inclade1.ortho4.tre	ME0	ME11	FALSE	FALSE	6.34522	1.53711	4.80811	-3.27099	16.497	2.68156	13.8154	-11.1339	0.40389	0.0317641	-0.000720839	NA	NA	NA	NA	NA	FALSE	FALSE	0	HUMMINGBIRD	0	HUMMINGBIRD
cluster10199_1rr.inclade1.ortho3.tre	ME5	ME8	FALSE	FALSE	8.73679	3.0584	5.67839	-2.61999	16.3219	6.48655	9.83533	-3.34879	0.24456	0.0540796	-0.0496903	HEM11_CUCSA	Glutamyl-tRNA reductase 1, chloroplastic (GluTR) (EC 1.2.1.70)	chlorophyll biosynthetic process [GO:0015995]; protoporphyrinogen IX biosynthetic process [GO:0006782]	chloroplast [GO:0009507]	glutamyl-tRNA reductase activity [GO:0008883]; NADP binding [GO:0050661]	FALSE	FALSE	HUMMINGBIRD	0	HUMMINGBIRD	0
cluster10200_1rr.inclade1.ortho1.tre	ME14	ME6	FALSE	FALSE	10.7401	2.13873	8.60137	-6.46264	20.034	6.30911	13.7249	-7.41578	0.37067	0.0128935	0.0483786	SBT34_ARATH	Subtilisin-like protease SBT3.4 (EC 3.4.21.-) (Subtilase subfamily 3 member 4) (AtSBT3.4)		extracellular region [GO:0005576]	serine-type endopeptidase activity [GO:0004252]	FALSE	FALSE	HUMMINGBIRD	HUMMINGBIRD	HUMMINGBIRD	HUMMINGBIRD
cluster10201_1rr.inclade1.ortho2.tre	ME21	ME2	FALSE	FALSE	9.85364	1.84648	8.00716	-6.16068	26.3666	12.9184	13.4482	-0.529852	0.10291	0.0018734	-0.0517983	CESA1_ORYSI	Probable cellulose synthase A catalytic subunit 1 [UDP-forming] (EC 2.4.1.12) (OsCesA1)	cellulose biosynthetic process [GO:0030244]; cell wall organization [GO:0071555]	integral component of membrane [GO:0016021]; plasma membrane [GO:0005886]	cellulose synthase (UDP-forming) activity [GO:0016760]; metal ion binding [GO:0046872]	FALSE	FALSE	BEE	0	BEE	BEE
cluster10202_1rr.inclade1.ortho3.tre	ME29	ME10	TRUE	FALSE	20.6436	9.19037	11.4532	-2.26282	25.4643	3.13039	22.3339	-19.2035	0.28696	0.101191	-0.056106	SCL14_ARATH	Scarecrow-like protein 14 (AtSCL14) (GRAS family protein 2) (AtGRAS-2)	positive regulation of transcription, DNA-templated [GO:0045893]; regulation of transcription, DNA-templated [GO:0006355]; response to xenobiotic stimulus [GO:0009410]; transcription, DNA-templated [GO:0006351]	cytosol [GO:0005829]; nucleus [GO:0005634]	DNA-binding transcription factor activity [GO:0003700]; sequence-specific DNA binding [GO:0043565]	FALSE	FALSE	0	0	HUMMINGBIRD	0
cluster10203_1rr.inclade1.ortho1.tre	ME8	ME6	FALSE	FALSE	33.4602	14.8781	18.5821	-3.70391	79.077	29.7528	49.3241	-19.5713	0.19102	-0.112289	-0.00573459	NA	NA	NA	NA	NA	FALSE	FALSE	0	HUMMINGBIRD	0	HUMMINGBIRD
cluster10204_1rr.inclade1.ortho1.tre	ME0	ME51	FALSE	TRUE	2.01906	0.447971	1.57109	-1.12312	3.19603	0.448457	2.74758	-2.29912	0.4631	-0.0133794	-0.0709002	6PGL5_ARATH	Probable 6-phosphogluconolactonase 5, chloroplastic (6PGL 5) (EC 3.1.1.31) (Protein EMBRYO DEFECTIVE 2024)	carbohydrate metabolic process [GO:0005975]; cellular response to redox state [GO:0071461]; defense response to bacterium [GO:0042742]; defense response to oomycetes [GO:0002229]; nitrate assimilation [GO:0042128]; pentose-phosphate shunt, oxidative branch [GO:0009051]	chloroplast [GO:0009507]; chloroplast stroma [GO:0009570]; peroxisome [GO:0005777]; plastid [GO:0009536]	6-phosphogluconolactonase activity [GO:0017057]	TRUE	TRUE	0	0	0	0
cluster10204_2rr.inclade1.ortho2.tre	ME2	ME34	FALSE	FALSE	22.5138	16.6674	5.84639	10.821	25.9156	2.70068	23.2149	-20.5143	0.29729	-0.0666901	0.0734456	6PGL4_ORYSJ	Probable 6-phosphogluconolactonase 4, chloroplastic (6PGL 4) (EC 3.1.1.31)	carbohydrate metabolic process [GO:0005975]; pentose-phosphate shunt, oxidative branch [GO:0009051]	chloroplast [GO:0009507]; cytoplasm [GO:0005737]	6-phosphogluconolactonase activity [GO:0017057]	FALSE	FALSE	0	0	0	0
cluster10205_1rr.inclade1.ortho3.tre	ME1	ME1	FALSE	FALSE	6.78169	2.67052	4.11116	-1.44064	11.4838	4.27162	7.2122	-2.94058	0.3173	0.0255888	-0.0153297	C7D55_HYOMU	Premnaspirodiene oxygenase (HPO) (EC 1.14.13.121) (Cytochrome P450 71D55)		integral component of membrane [GO:0016021]	heme binding [GO:0020037]; iron ion binding [GO:0005506]; monooxygenase activity [GO:0004497]; oxidoreductase activity, acting on paired donors, with incorporation or reduction of molecular oxygen [GO:0016705]	FALSE	FALSE	0	0	0	0
cluster10206_1rr.inclade1.ortho3.tre	ME46	ME8	FALSE	FALSE	12.4594	2.37856	10.0808	-7.70229	27.5092	11.8581	15.6511	-3.79302	0.1842	-0.145106	0.00560937	NA	NA	NA	NA	NA	FALSE	FALSE	0	0	0	0
cluster10207_1rr.inclade1.ortho3.tre	ME0	ME10	FALSE	FALSE	5.81589	2.8667	2.94919	-0.0824946	12.0624	1.90567	10.1568	-8.25111	0.70668	0.0233051	0.0253085	NA	NA	NA	NA	NA	FALSE	FALSE	0	0	0	0
cluster10208_1rr.inclade1.ortho2.tre	ME0	ME0	FALSE	FALSE	9.44233	2.30803	7.13431	-4.82628	21.3325	1.78206	19.5504	-17.7684	0.14886	-0.0634843	-0.0674509	NA	NA	NA	NA	NA	FALSE	FALSE	0	0	0	0
cluster10209_1rr.inclade1.ortho1.tre	ME9	ME4	FALSE	FALSE	6.63854	1.58006	5.05848	-3.47842	21.5088	6.40467	15.1041	-8.69947	0.22478	0.0239177	0.0935719	LHTL8_ARATH	Lysine histidine transporter-like 8 (Amino acid transporter-like protein 1)	amino acid transmembrane transport [GO:0003333]	integral component of membrane [GO:0016021]; plasma membrane [GO:0005886]	amino acid transmembrane transporter activity [GO:0015171]	FALSE	FALSE	HUMMINGBIRD	0	HUMMINGBIRD	0
cluster10209_2rr.inclade1.ortho3.tre	ME0	ME33	FALSE	FALSE	5.78159	2.08159	3.7	-1.6184	14.1011	1.79401	12.3071	-10.5131	0.27565	0.0215434	-0.0416556	LHTL8_ARATH	Lysine histidine transporter-like 8 (Amino acid transporter-like protein 1)	amino acid transmembrane transport [GO:0003333]	integral component of membrane [GO:0016021]; plasma membrane [GO:0005886]	amino acid transmembrane transporter activity [GO:0015171]	FALSE	FALSE	0	0	0	0
cluster10212_1rr.inclade1.ortho2.tre	ME27	ME5	TRUE	FALSE	35.7674	18.1682	17.5992	0.568942	46.8769	25.3857	21.4913	3.89442	0.11372	-0.150463	-0.067969	RMLCD_ARATH	Bifunctional dTDP-4-dehydrorhamnose 3,5-epimerase/dTDP-4-dehydrorhamnose reductase (EC 1.1.1.133) (EC 5.1.3.13) (dTDP-L-rhamnose synthase)	cell wall organization [GO:0071555]; dTDP-rhamnose biosynthetic process [GO:0019305]; UDP-rhamnose biosynthetic process [GO:0010253]	apoplast [GO:0048046]; cytosol [GO:0005829]; plasma membrane [GO:0005886]; plasmodesma [GO:0009506]	dTDP-4-dehydrorhamnose 3,5-epimerase activity [GO:0008830]; dTDP-4-dehydrorhamnose reductase activity [GO:0008831]; UDP-4-keto-6-deoxy-glucose-3,5-epimerase activity [GO:0010489]; UDP-4-keto-rhamnose-4-keto-reductase activity [GO:0010490]	FALSE	FALSE	BEE	BEE	BEE	BEE
cluster10214_1rr.inclade1.ortho5.tre	ME23	ME12	TRUE	FALSE	17.4568	7.47083	9.986	-2.51517	48.641	24.1282	24.5128	-0.38454	0.34205	0.0491033	0.0401459	NA	NA	NA	NA	NA	FALSE	FALSE	BUTTERFLY	BUTTERFLY	BUTTERFLY	BUTTERFLY
cluster10215_1rr.inclade1.ortho1.tre	ME30	ME7	FALSE	FALSE	5.41013	0.649262	4.76087	-4.11161	9.05777	1.36944	7.68833	-6.31889	0.21623	0.0229298	0.0297727	TRXH_POPJC	Thioredoxin H-type (Trxh4)	cell redox homeostasis [GO:0045454]; glycerol ether metabolic process [GO:0006662]	cytoplasm [GO:0005737]	protein disulfide oxidoreductase activity [GO:0015035]	FALSE	FALSE	0	0	HUMMINGBIRD	0
cluster10217_1rr.inclade1.ortho3.tre	ME9	ME6	FALSE	TRUE	11.3977	1.43846	9.95922	-8.52075	24.7974	8.32371	16.4737	-8.14997	0.26408	0.0579204	-0.0234597	TET19_ARATH	Tetraspanin-19 (TOM2A homologous protein 3)		integral component of membrane [GO:0016021]; vacuolar membrane [GO:0005774]		FALSE	FALSE	HUMMINGBIRD	HUMMINGBIRD	HUMMINGBIRD	HUMMINGBIRD
cluster10218_1rr.inclade1.ortho3.tre	ME16	ME5	FALSE	FALSE	23.4787	2.78701	20.6917	-17.9047	35.8674	11.7825	24.0849	-12.3025	0.40366	0.0327277	0.0703685	U89B2_STERE	UDP-glycosyltransferase 89B2 (EC 2.4.1.-)	metabolic process [GO:0008152]		transferase activity, transferring hexosyl groups [GO:0016758]	FALSE	FALSE	BUTTERFLY	BEE	BUTTERFLY	BEE
cluster10221_1rr.inclade1.ortho3.tre	ME18	ME9	FALSE	TRUE	23.7103	7.00827	16.702	-9.69374	7.27045	1.97274	5.29771	-3.32497	0.26991	-0.133832	-0.0373887	NA	NA	NA	NA	NA	FALSE	FALSE	BUTTERFLY	0	BUTTERFLY	0
cluster10222_1rr.inclade1.ortho3.tre	ME19	ME36	FALSE	FALSE	14.0833	4.8761	9.20724	-4.33114	14.5816	2.59418	11.9874	-9.39326	0.18677	0.127921	-0.0101928	HDT1_SOLCH	Histone deacetylase HDT1 (Histone deacetylase 2a) (HD2a) (ScHD2a)	chromatin organization [GO:0006325]; regulation of transcription, DNA-templated [GO:0006355]; transcription, DNA-templated [GO:0006351]	nucleolus [GO:0005730]	hydrolase activity [GO:0016787]; metal ion binding [GO:0046872]; nucleic acid binding [GO:0003676]	FALSE	FALSE	0	0	0	0
cluster10223_1rr.inclade1.ortho1.tre	ME47	ME36	FALSE	FALSE	5.43189	1.15916	4.27273	-3.11357	9.22821	1.44267	7.78554	-6.34287	0.09586	-0.0305448	0.0539102	IDD1_ARATH	Protein indeterminate-domain 1 (Protein ENHYDROUS)	regulation of gibberellic acid mediated signaling pathway [GO:0009937]; regulation of seed germination [GO:0010029]; regulation of transcription, DNA-templated [GO:0006355]; seed maturation [GO:0010431]; transcription, DNA-templated [GO:0006351]	nucleus [GO:0005634]	DNA-binding transcription factor activity [GO:0003700]; metal ion binding [GO:0046872]; transcription regulatory region DNA binding [GO:0044212]	FALSE	FALSE	0	0	0	0
cluster10224_1rr.inclade1.ortho3.tre	ME0	ME28	FALSE	FALSE	4.42687	1.8983	2.52857	-0.630266	15.3058	3.70966	11.5961	-7.88649	0.41051	-0.0699661	-0.0151249	BPA1_ARATH	Binding partner of ACD11 1	response to cytokinin [GO:0009735]	cytoplasm [GO:0005737]; membrane [GO:0016020]	RNA binding [GO:0003723]	FALSE	FALSE	0	0	0	0
cluster10225_1rr.inclade1.ortho2.tre	ME46	ME5	FALSE	FALSE	5.18303	1.2286	3.95443	-2.72583	17.3701	3.96552	13.4046	-9.43909	0.22464	-0.0636181	0.0458503	NA	NA	NA	NA	NA	FALSE	FALSE	0	BEE	0	BEE
cluster10226_1rr.inclade1.ortho4.tre	ME0	ME2	FALSE	FALSE	1.78692	0.499202	1.28772	-0.788521	4.80868	2.48944	2.31924	0.170203	0.38856	-0.038411	0.00376256	NA	NA	NA	NA	NA	TRUE	FALSE	0	0	0	BEE
cluster10228_1rr.inclade1.ortho7.tre	ME25	ME0	FALSE	FALSE	2.61339	0.351154	2.26224	-1.91109	5.04244	1.00989	4.03255	-3.02266	0.28281	0.0251049	0.00826605	TLP7_ARATH	Tubby-like F-box protein 7 (AtTLP7)	pollen development [GO:0009555]; regulation of transcription, DNA-templated [GO:0006355]; response to fungus [GO:0009620]	cytosol [GO:0005829]; nucleus [GO:0005634]; plasma membrane [GO:0005886]; plastid [GO:0009536]	DNA-binding transcription factor activity [GO:0003700]; phosphatidylinositol binding [GO:0035091]; transcription regulatory region DNA binding [GO:0044212]	TRUE	FALSE	BUTTERFLY	0	BUTTERFLY	0
cluster10229_1rr.inclade1.ortho1.tre	ME49	ME1	FALSE	FALSE	28.3416	3.16353	25.1781	-22.0146	124.729	83.7752	40.954	42.8212	0.11809	-0.125878	-0.0632416	CIPKA_ARATH	CBL-interacting serine/threonine-protein kinase 10 (EC 2.7.11.1) (SNF1-related kinase 3.8) (SOS2-like protein kinase PKS2) (SOS3-interacting protein 1)	intracellular signal transduction [GO:0035556]; peptidyl-serine phosphorylation [GO:0018105]; peptidyl-threonine phosphorylation [GO:0018107]	intracellular [GO:0005622]	ATP binding [GO:0005524]; protein serine/threonine kinase activity [GO:0004674]	FALSE	FALSE	0	0	0	0
cluster10233_1rr.inclade1.ortho2.tre	ME24	ME1	FALSE	FALSE	36.203	6.57982	29.6231	-23.0433	80.1736	51.5885	28.5851	23.0034	0.15781	-0.0282256	-0.0267005	DIOXL_ARATH	Extradiol ring-cleavage dioxygenase (AtLigB) (EC 1.13.11.-)	cellular aromatic compound metabolic process [GO:0006725]		dioxygenase activity [GO:0051213]; ferrous iron binding [GO:0008198]; oxidoreductase activity, acting on single donors with incorporation of molecular oxygen [GO:0016701]; zinc ion binding [GO:0008270]	FALSE	FALSE	0	0	0	0
cluster10234_1rr.inclade1.ortho3.tre	ME22	ME14	TRUE	TRUE	27.1247	18.8572	8.2675	10.5897	37.38	22.654	14.7259	7.92812	0.18461	-0.0693751	-0.0153603	MTP1_ARATH	Metal tolerance protein 1 (AtMTP1) (ZAT1p) (Zinc transporter ZAT-1) [Cleaved into: Metal tolerance protein 1 short form]	cellular zinc ion homeostasis [GO:0006882]; regulation of sequestering of zinc ion [GO:0061088]; response to zinc ion [GO:0010043]; zinc ion transport [GO:0006829]	integral component of membrane [GO:0016021]; membrane [GO:0016020]; vacuolar membrane [GO:0005774]; vacuole [GO:0005773]	metal ion binding [GO:0046872]; metal ion transmembrane transporter activity [GO:0046873]; zinc ion transmembrane transporter activity [GO:0005385]	FALSE	FALSE	HUMMINGBIRD	HUMMINGBIRD	HUMMINGBIRD	HUMMINGBIRD
cluster10236_1rr.inclade1.ortho5.tre	ME3	ME2	FALSE	FALSE	35.3882	22.5504	12.8378	9.71256	50.0351	39.329	10.7061	28.6229	0.26295	-0.0241136	-0.0223714	NA	NA	NA	NA	NA	FALSE	FALSE	0	0	BEE	BEE
cluster10237_1rr.inclade1.ortho1.tre	ME8	ME35	FALSE	FALSE	3.18757	0.678904	2.50866	-1.82976	9.73486	1.76182	7.97304	-6.21122	0.39779	0.0149283	-0.0181472	P2C44_ORYSJ	Probable protein phosphatase 2C 44 (OsPP2C44) (EC 3.1.3.16)			metal ion binding [GO:0046872]; protein serine/threonine phosphatase activity [GO:0004722]	FALSE	FALSE	0	0	0	0
cluster1024_1rr.inclade1.ortho3.tre	ME10	ME3	FALSE	FALSE	10.7364	2.46666	8.26977	-5.80311	34.1495	17.302	16.8475	0.454517	0.36252	0.0382707	-0.0319855	PLDA1_ORYSJ	Phospholipase D alpha 1 (PLD alpha 1) (EC 3.1.4.4) (Choline phosphatase 1) (Phosphatidylcholine-hydrolyzing phospholipase D 1)	lipid catabolic process [GO:0016042]; phosphatidylcholine metabolic process [GO:0046470]	membrane [GO:0016020]	calcium ion binding [GO:0005509]; N-acylphosphatidylethanolamine-specific phospholipase D activity [GO:0070290]; phospholipase D activity [GO:0004630]	FALSE	FALSE	0	0	0	BUTTERFLY
cluster1024_2rr.inclade1.ortho4.tre	ME3	ME2	TRUE	FALSE	45.9486	37.0882	8.86038	28.2279	69.3494	61.2334	8.11595	53.1175	0.087	-0.0786916	-0.0288721	PLDA1_RICCO	Phospholipase D alpha 1 (PLD 1) (EC 3.1.4.4) (Choline phosphatase 1) (Phosphatidylcholine-hydrolyzing phospholipase D 1)	lipid catabolic process [GO:0016042]; phosphatidylcholine metabolic process [GO:0046470]	endoplasmic reticulum [GO:0005783]; plasma membrane [GO:0005886]; plastid [GO:0009536]; vacuole [GO:0005773]	calcium ion binding [GO:0005509]; N-acylphosphatidylethanolamine-specific phospholipase D activity [GO:0070290]; phospholipase D activity [GO:0004630]	FALSE	FALSE	0	0	BEE	BEE
cluster10246_1rr.inclade1.ortho4.tre	ME1	ME1	FALSE	FALSE	34.3183	22.337	11.9813	10.3557	33.6764	17.6544	16.022	1.63243	0.27234	-0.0146096	-0.0798019	NA	NA	NA	NA	NA	FALSE	FALSE	0	0	0	0
cluster10248_1rr.inclade1.ortho3.tre	ME23	ME3	FALSE	FALSE	7.56859	1.39413	6.17446	-4.78034	11.8728	3.52809	8.34471	-4.81663	0.27539	0.0408079	0.0284766	AB10I_ARATH	ABC transporter I family member 10 (ABC transporter ABCI.10) (AtABCI10) (Non-intrinsic ABC protein 13) (Protein EMBRYO DEFECTIVE 2751)		chloroplast envelope [GO:0009941]	ATPase activity [GO:0016887]; ATP binding [GO:0005524]; transporter activity [GO:0005215]	FALSE	FALSE	BUTTERFLY	0	BUTTERFLY	BUTTERFLY
cluster10250_1rr.inclade1.ortho1.tre	ME2	ME0	FALSE	FALSE	1.99871	0.848397	1.15031	-0.301918	2.01258	0.291445	1.72114	-1.42969	0.38828	0.00237845	0.0277662	NA	NA	NA	NA	NA	TRUE	TRUE	0	0	0	0
cluster10251_2rr.inclade1.ortho1.tre	ME31	ME2	FALSE	FALSE	27.8778	4.87422	23.0036	-18.1294	17.2739	3.53136	13.7425	-10.2112	0.18196	-0.0438409	-0.00307476	LRKS7_ARATH	Probable L-type lectin-domain containing receptor kinase S.7 (LecRK-S.7) (EC 2.7.11.1)	defense response to oomycetes [GO:0002229]	integral component of membrane [GO:0016021]; plasma membrane [GO:0005886]	ATP binding [GO:0005524]; carbohydrate binding [GO:0030246]; protein serine/threonine kinase activity [GO:0004674]	FALSE	FALSE	0	0	0	BEE
cluster10253_1rr.inclade1.ortho2.tre	ME10	ME4	FALSE	FALSE	28.8993	10.389	18.5104	-8.12138	90.915	54.1586	36.7564	17.4023	0.32838	0.0872153	0.113171	SDE3_ARATH	Probable RNA helicase SDE3 (EC 3.6.4.13) (Silencing defective protein 3)	posttranscriptional gene silencing by RNA [GO:0035194]; virus induced gene silencing [GO:0009616]	cytoplasm [GO:0005737]	ATP binding [GO:0005524]; RNA helicase activity [GO:0003724]	FALSE	FALSE	0	0	0	0
cluster10258_1rr.inclade1.ortho1.tre	ME2	ME23	FALSE	FALSE	12.958	7.634	5.32398	2.31003	7.75084	0.90313	6.84771	-5.94458	0.48148	-0.0359371	0.0377052	BZP24_ARATH	Basic leucine zipper 24 (AtbZIP24) (bZIP protein 24)	negative regulation of response to salt stress [GO:1901001]; transcription, DNA-templated [GO:0006351]	cytoplasm [GO:0005737]; nucleus [GO:0005634]	DNA binding [GO:0003677]; DNA-binding transcription factor activity [GO:0003700]; protein homodimerization activity [GO:0042803]	FALSE	FALSE	0	BUTTERFLY	0	BUTTERFLY
cluster10261_1rr.inclade1.ortho2.tre	ME8	ME6	FALSE	FALSE	10.5745	2.88806	7.68643	-4.79837	23.7394	8.43987	15.2995	-6.85963	0.3715	0.0214164	0.0126658	MBD2_ARATH	Methyl-CpG-binding domain-containing protein 2 (AtMBD2) (MBD02) (Methyl-CpG-binding protein MBD2)	DNA demethylation [GO:0080111]; regulation of transcription, DNA-templated [GO:0006355]; transcription, DNA-templated [GO:0006351]	nucleus [GO:0005634]	DNA binding [GO:0003677]; enzyme binding [GO:0019899]; zinc ion binding [GO:0008270]	FALSE	FALSE	0	HUMMINGBIRD	0	HUMMINGBIRD
cluster10263_1rr.inclade1.ortho3.tre	ME11	ME4	FALSE	TRUE	20.7131	6.18864	14.5244	-8.33581	21.4991	6.9476	14.5515	-7.6039	0.32981	0.0618105	0.0626117	RM02_ORYSJ	60S ribosomal protein L2, mitochondrial	mitochondrial translation [GO:0032543]	mitochondrial large ribosomal subunit [GO:0005762]; mitochondrion [GO:0005739]	RNA binding [GO:0003723]; structural constituent of ribosome [GO:0003735]	FALSE	FALSE	0	0	0	0
cluster10264_1rr.inclade1.ortho4.tre	ME19	ME6	FALSE	FALSE	6.0027	1.05615	4.94655	-3.8904	8.60914	2.03551	6.57363	-4.53811	0.35008	0.123247	-0.0356769	LPA1_ARATH	Protein LOW PSII ACCUMULATION 1, chloroplastic	photosystem II oxygen evolving complex assembly [GO:0010270]	chloroplast [GO:0009507]; chloroplast thylakoid membrane [GO:0009535]; integral component of membrane [GO:0016021]		FALSE	FALSE	0	HUMMINGBIRD	0	HUMMINGBIRD
cluster10266_1rr.inclade1.ortho1.tre	ME0	ME7	FALSE	FALSE	0.723091	0.123729	0.599361	-0.475632	7.03307	1.30311	5.72996	-4.42685	0.14422	-0.0140819	-0.0173712	POT6_ARATH	Potassium transporter 6 (AtHAK6) (AtPOT6)		integral component of membrane [GO:0016021]; plasma membrane [GO:0005886]	potassium ion transmembrane transporter activity [GO:0015079]	TRUE	FALSE	0	0	0	0
cluster10267_1rr.inclade1.ortho3.tre	ME3	ME2	FALSE	FALSE	34.706	27.3061	7.39998	19.9061	55.518	47.5939	7.92409	39.6699	0.40881	-0.0628396	-0.0308479	HSOP_WHEAT	Hsp70-Hsp90 organizing protein (TaHop)	chaperone-mediated protein complex assembly [GO:0051131]	cytoplasm [GO:0005737]; nucleus [GO:0005634]	Hsp90 protein binding [GO:0051879]; preprotein binding [GO:0070678]	FALSE	FALSE	0	0	BEE	BEE
cluster10268_1rr.inclade1.ortho1.tre	ME26	ME11	FALSE	FALSE	11.6387	2.53377	9.1049	-6.57113	25.2627	6.78022	18.4825	-11.7023	0.23513	-0.00362754	0.00072343	TL15A_ARATH	Thylakoid lumenal 15 kDa protein 1, chloroplastic (p15)		chloroplast [GO:0009507]; chloroplast thylakoid [GO:0009534]; chloroplast thylakoid lumen [GO:0009543]; chloroplast thylakoid membrane [GO:0009535]; thylakoid [GO:0009579]; thylakoid lumen [GO:0031977]		FALSE	FALSE	HUMMINGBIRD	HUMMINGBIRD	HUMMINGBIRD	HUMMINGBIRD
cluster10269_1rr.inclade1.ortho3.tre	ME11	ME4	FALSE	FALSE	30.3758	11.9905	18.3853	-6.39473	66.2307	37.7202	28.5106	9.20958	0.56826	0.0510427	-0.00534502	NA	NA	NA	NA	NA	FALSE	FALSE	0	0	0	0
cluster1027_1rr.inclade1.ortho1.tre	ME3	ME2	FALSE	FALSE	3.38451	1.37526	2.00926	-0.633997	5.42494	2.54729	2.87766	-0.330373	0.3861	-0.00888918	-0.0463789	CESA9_ARATH	Probable cellulose synthase A catalytic subunit 9 [UDP-forming] (AtCesA9) (EC 2.4.1.12)	cellulose biosynthetic process [GO:0030244]; cell wall organization [GO:0071555]; plant-type primary cell wall biogenesis [GO:0009833]; seed coat development [GO:0010214]	Golgi apparatus [GO:0005794]; integral component of membrane [GO:0016021]; plasma membrane [GO:0005886]	cellulose synthase (UDP-forming) activity [GO:0016760]; cellulose synthase activity [GO:0016759]; metal ion binding [GO:0046872]	FALSE	FALSE	0	0	BEE	BEE
cluster10271_1rr.inclade1.ortho3.tre	ME3	ME2	FALSE	FALSE	24.6497	19.2052	5.4445	13.7607	37.6266	24.1972	13.4294	10.7678	0.55394	-0.0841154	-0.0467249	NA	NA	NA	NA	NA	FALSE	FALSE	0	0	BEE	BEE
cluster10272_1rr.inclade1.ortho4.tre	ME6	ME2	FALSE	FALSE	13.2966	3.42086	9.87573	-6.45487	21.9299	11.4944	10.4355	1.05895	0.41471	-0.000167051	-0.0630194	YAB2_ARATH	Putative axial regulator YABBY 2	abaxial cell fate specification [GO:0010158]; multicellular organism development [GO:0007275]	nucleus [GO:0005634]	DNA binding [GO:0003677]; DNA-binding transcription factor activity [GO:0003700]; metal ion binding [GO:0046872]	FALSE	FALSE	BEE	0	BEE	BEE
cluster10273_1rr.inclade1.ortho1.tre	ME48	ME52	TRUE	FALSE	20.1993	5.72553	14.4738	-8.74823	36.7087	8.89774	27.8109	-18.9132	0.07298	0.0448799	-0.0165769	LSM4_TOBAC	Probable U6 snRNA-associated Sm-like protein LSm4 (Glycine-rich protein 10) (GRP 10)	mRNA splicing, via spliceosome [GO:0000398]; nuclear-transcribed mRNA catabolic process [GO:0000956]	spliceosomal complex [GO:0005681]	RNA binding [GO:0003723]	FALSE	FALSE	0	0	0	0
cluster10274_1rr.inclade1.ortho1.tre	ME12	ME0	FALSE	FALSE	9.20372	3.32983	5.87389	-2.54406	15.0049	3.90557	11.0993	-7.19378	0.67931	0.00742498	0.00452426	E134_MAIZE	Endo-1,3;1,4-beta-D-glucanase (EC 3.2.1.-)		extracellular region [GO:0005576]	hydrolase activity [GO:0016787]	FALSE	FALSE	0	0	0	0
cluster10275_1rr.inclade1.ortho3.tre	ME10	ME3	FALSE	FALSE	20.0047	3.72099	16.2837	-12.5627	29.0059	13.0183	15.9875	-2.96921	0.31853	0.0669153	0.0570053	ASIL2_ARATH	Trihelix transcription factor ASIL2 (6B-interacting protein 1-like 2) (Trihelix DNA-binding protein ASIL2)	embryo development ending in seed dormancy [GO:0009793]; regulation of transcription, DNA-templated [GO:0006355]; seed maturation [GO:0010431]; transcription, DNA-templated [GO:0006351]	nucleus [GO:0005634]	DNA-binding transcription factor activity [GO:0003700]; sequence-specific DNA binding [GO:0043565]	FALSE	FALSE	0	0	0	BUTTERFLY
cluster10277_1rr.inclade1.ortho3.tre	ME18	ME32	FALSE	FALSE	20.7421	7.55299	13.1891	-5.63609	10.3814	2.58464	7.79677	-5.21213	0.30081	-0.0793763	0.0176934	PAP8_ARATH	Probable plastid-lipid-associated protein 8, chloroplastic (Fibrillin-6)		chloroplast [GO:0009507]; chloroplast envelope [GO:0009941]; chloroplast thylakoid [GO:0009534]		FALSE	FALSE	BUTTERFLY	BUTTERFLY	BUTTERFLY	BUTTERFLY
cluster10278_1rr.inclade1.ortho2.tre	ME13	ME18	FALSE	FALSE	5.48815	2.18252	3.30563	-1.12311	10.7227	2.2672	8.45555	-6.18835	0.37272	0.0452852	0.0304881	RBFA_ARATH	Probable ribosome-binding factor A, chloroplastic	ribosome biogenesis [GO:0042254]; rRNA processing [GO:0006364]	chloroplast [GO:0009507]		FALSE	FALSE	HUMMINGBIRD	HUMMINGBIRD	HUMMINGBIRD	HUMMINGBIRD
cluster10279_1rr.inclade1.ortho3.tre	ME1	ME2	FALSE	FALSE	4.05544	0.92102	3.13442	-2.2134	28.1598	12.1355	16.0244	-3.8889	0.31467	0.0323133	0.00150395	NA	NA	NA	NA	NA	FALSE	FALSE	0	0	0	BEE
cluster10281_1rr.inclade1.ortho2.tre	ME12	ME15	FALSE	FALSE	6.32628	1.67997	4.64631	-2.96633	5.83828	2.04465	3.79363	-1.74898	0.15752	-0.0206683	-0.0429036	TDT_ARATH	Tonoplast dicarboxylate transporter (AttDT) (Sodium-dicarboxylate cotransporter-like) (AtSDAT) (Vacuolar malate transporter)	malate transport [GO:0015743]; regulation of intracellular pH [GO:0051453]; sodium ion transport [GO:0006814]	integral component of membrane [GO:0016021]; vacuolar membrane [GO:0005774]; vacuole [GO:0005773]	malate transmembrane transporter activity [GO:0015140]	FALSE	FALSE	0	0	0	0
cluster10282_1rr.inclade1.ortho3.tre	ME2	ME25	FALSE	FALSE	9.40434	5.63926	3.76508	1.87418	13.5187	1.99966	11.519	-9.51938	0.42104	-0.0472143	0.0105425	NIFU2_ARATH	NifU-like protein 2, chloroplastic (AtCNfu2) (AtCnfU-V)	chloroplast organization [GO:0009658]; iron-sulfur cluster assembly [GO:0016226]	chloroplast [GO:0009507]; chloroplast stroma [GO:0009570]	2 iron, 2 sulfur cluster binding [GO:0051537]; iron ion binding [GO:0005506]; structural molecule activity [GO:0005198]	FALSE	FALSE	0	0	0	0
cluster10283_1rr.inclade1.ortho2.tre	ME4	ME41	FALSE	FALSE	8.6875	3.81915	4.86835	-1.0492	11.1911	1.3182	9.87293	-8.55473	0.35563	0.0849758	0.0727417	PP129_ARATH	Pentatricopeptide repeat-containing protein At1g77360, mitochondrial	RNA modification [GO:0009451]	intracellular membrane-bounded organelle [GO:0043231]; mitochondrion [GO:0005739]	endonuclease activity [GO:0004519]; RNA binding [GO:0003723]	FALSE	FALSE	0	0	0	0
cluster10284_1rr.inclade1.ortho3.tre	ME4	ME12	FALSE	FALSE	26.1527	5.48072	20.672	-15.1913	46.8942	11.0117	35.8825	-24.8708	0.06582	0.112609	0.0179067	NA	NA	NA	NA	NA	FALSE	FALSE	0	BUTTERFLY	0	BUTTERFLY
cluster10285_1rr.inclade1.ortho3.tre	ME24	ME1	FALSE	FALSE	28.2862	9.82699	18.4592	-8.63226	28.912	16.0214	12.8907	3.13071	0.40324	-0.0432394	-0.023716	CHUP1_ARATH	Protein CHUP1, chloroplastic (Protein CHLOROPLAST UNUSUAL POSITIONING 1)	chloroplast relocation [GO:0009902]	chloroplast [GO:0009507]; chloroplast outer membrane [GO:0009707]		FALSE	FALSE	0	0	0	0
cluster10288_1rr.inclade1.ortho1.tre	ME16	ME22	FALSE	FALSE	5.11744	1.05305	4.06439	-3.01135	7.57311	0.732171	6.84094	-6.10877	0.36725	0.0545122	-0.00663641	NA	NA	NA	NA	NA	FALSE	FALSE	BUTTERFLY	HUMMINGBIRD	BUTTERFLY	HUMMINGBIRD
cluster10289_1rr.inclade1.ortho2.tre	ME14	ME11	FALSE	FALSE	16.2449	3.62723	12.6177	-8.99044	14.9762	4.73766	10.2386	-5.50089	0.41928	0.0561364	-0.0758997	CHIA_CICAR	Acidic endochitinase (EC 3.2.1.14)	chitin catabolic process [GO:0006032]; polysaccharide catabolic process [GO:0000272]	extracellular space [GO:0005615]	chitinase activity [GO:0004568]	FALSE	FALSE	HUMMINGBIRD	HUMMINGBIRD	HUMMINGBIRD	HUMMINGBIRD
cluster1029_1rr.inclade2.ortho1.tre	ME21	ME2	FALSE	FALSE	5.36172	0.666904	4.69482	-4.02792	14.2655	6.14167	8.12383	-1.98217	0.06525	-0.106224	-0.0204866	VP26A_ARATH	Vacuolar protein sorting-associated protein 26A (Vesicle protein sorting 26A)	intracellular protein transport [GO:0006886]; retrograde transport, endosome to Golgi [GO:0042147]	cytosol [GO:0005829]; Golgi apparatus [GO:0005794]; intracellular membrane-bounded organelle [GO:0043231]; late endosome membrane [GO:0031902]; membrane [GO:0016020]; multivesicular body [GO:0005771]; retromer complex [GO:0030904]	protein transporter activity [GO:0008565]	FALSE	FALSE	BEE	0	BEE	BEE
cluster1029_1rr.inclade3.ortho1.tre	ME11	ME39	FALSE	FALSE	13.5307	3.398	10.1327	-6.73475	30.5375	4.74252	25.795	-21.0525	0.24337	0.0317305	0.100689	VP26B_ARATH	Vacuolar protein sorting-associated protein 26B (Vesicle protein sorting 26B)	intracellular protein transport [GO:0006886]; retrograde transport, endosome to Golgi [GO:0042147]	cytosol [GO:0005829]; endosome [GO:0005768]; Golgi apparatus [GO:0005794]; late endosome membrane [GO:0031902]; retromer complex [GO:0030904]	protein transporter activity [GO:0008565]	FALSE	FALSE	0	0	0	0
cluster10292_1rr.inclade1.ortho1.tre	ME3	ME2	TRUE	FALSE	45.9041	33.8491	12.055	21.7941	54.6828	45.8946	8.78827	37.1063	0.24438	-0.0866593	-0.0392445	MB3R4_ARATH	Transcription factor MYB3R-4 (Myb-related protein 3R-4) (Protein ENHANCED DEFECTIVE CYTOKINESIS)	cell differentiation [GO:0030154]; negative regulation of cellular response to caffeine [GO:1901181]; positive regulation of transcription, DNA-templated [GO:0045893]; regulation of cytokinesis [GO:0032465]; regulation of DNA endoreduplication [GO:0032875]; regulation of transcription, DNA-templated [GO:0006355]; regulation of transcription by RNA polymerase II [GO:0006357]; response to fungus [G…	nucleus [GO:0005634]	DNA-binding transcription factor activity [GO:0003700]; RNA polymerase II transcription factor activity, sequence-specific DNA binding [GO:0000981]; sequence-specific DNA binding [GO:0043565]; transcription coactivator activity [GO:0003713]; transcription factor activity, RNA polymerase II transcription factor recruiting [GO:0001135]; transcription regulatory region DNA binding [GO:0044212]	FALSE	FALSE	0	0	BEE	BEE
cluster10293_1rr.inclade1.ortho1.tre	ME7	ME20	FALSE	FALSE	14.7011	3.20868	11.4924	-8.28374	19.0532	3.86204	15.1912	-11.3292	0.95615	0.0365541	0.0392266	NA	NA	NA	NA	NA	FALSE	FALSE	0	0	0	0
cluster10294_1rr.inclade1.ortho4.tre	ME0	ME51	FALSE	FALSE	6.0505	2.61526	3.43524	-0.819984	12.8694	3.73927	9.13017	-5.3909	0.25916	0.0573978	0.00538664	NA	NA	NA	NA	NA	FALSE	FALSE	0	0	0	0
cluster10295_1rr.inclade1.ortho2.tre	ME1	ME28	FALSE	FALSE	9.36652	3.16077	6.20575	-3.04499	5.53225	1.26338	4.26886	-3.00548	0.30824	-0.0813988	0.061445	MSL10_ARATH	Mechanosensitive ion channel protein 10 (Mechanosensitive channel of small conductance-like 10) (MscS-Like protein 10) (AtMSL10)	anion transport [GO:0006820]; detection of mechanical stimulus [GO:0050982]; leaf senescence [GO:0010150]; programmed cell death in response to reactive oxygen species [GO:0097468]	integral component of membrane [GO:0016021]; plasma membrane [GO:0005886]	mechanosensitive ion channel activity [GO:0008381]	FALSE	FALSE	0	0	0	0
cluster10296_1rr.inclade1.ortho1.tre	ME4	ME17	FALSE	FALSE	13.9629	4.64328	9.31963	-4.67636	14.6209	5.60407	9.01683	-3.41276	0.34318	0.0726539	0.0271426	NA	NA	NA	NA	NA	FALSE	FALSE	0	BUTTERFLY	0	BUTTERFLY
cluster10298_1rr.inclade1.ortho5.tre	ME30	ME16	TRUE	FALSE	23.4804	8.42046	15.06	-6.6395	26.3633	10.7322	15.6311	-4.89897	0.29648	0.115824	-0.0152108	PP306_ARATH	Pentatricopeptide repeat-containing protein At4g11690	mitochondrial mRNA modification [GO:0080156]; response to abscisic acid [GO:0009737]	mitochondrion [GO:0005739]	endonuclease activity [GO:0004519]; RNA binding [GO:0003723]	FALSE	FALSE	0	0	HUMMINGBIRD	0
cluster10299_1rr.inclade1.ortho1.tre	ME60	ME43	TRUE	FALSE	7.94258	2.78602	5.15656	-2.37054	18.9201	3.10105	15.819	-12.718	0.14119	-0.0565279	-0.0552891	Y6344_ARATH	UPF0235 protein At5g63440	mRNA processing [GO:0006397]; RNA splicing [GO:0008380]	nuclear speck [GO:0016607]; nucleus [GO:0005634]; spliceosomal complex [GO:0005681]		FALSE	FALSE	0	0	0	0
cluster103_1rr.inclade1.ortho2.tre	ME39	ME5	FALSE	FALSE	4.66959	1.13252	3.53707	-2.40456	12.7165	4.952	7.76446	-2.81246	0.23602	-0.0215143	-0.0877973	FBL11_ARATH	BTB/POZ domain-containing protein FBL11	protein ubiquitination [GO:0016567]			FALSE	FALSE	0	BEE	BUTTERFLY	BEE
cluster1030_1rr.inclade1.ortho7.tre	ME34	ME8	FALSE	TRUE	3.09808	0.394502	2.70358	-2.30908	8.1861	1.01204	7.17406	-6.16203	0.81685	0.0497021	0.0598625	NA	NA	NA	NA	NA	FALSE	FALSE	HUMMINGBIRD	0	HUMMINGBIRD	0
cluster10300_1rr.inclade1.ortho2.tre	ME2	ME3	FALSE	FALSE	24.1059	17.5134	6.59249	10.921	15.44	6.35076	9.08928	-2.73852	0.08887	-0.063486	0.0394523	GC1_ARATH	Epimerase family protein SDR39U1 homolog, chloroplastic (EC 1.1.1.-) (Protein GIANT CHLOROPLAST 1) (Protein SulA homolog) (AtSulA)	chloroplast fission [GO:0010020]	chloroplast [GO:0009507]; chloroplast envelope [GO:0009941]; chloroplast inner membrane [GO:0009706]; plastid [GO:0009536]	coenzyme binding [GO:0050662]; oxidoreductase activity [GO:0016491]; protein homodimerization activity [GO:0042803]	FALSE	FALSE	0	0	0	BUTTERFLY
cluster10301_1rr.inclade1.ortho2.tre	ME5	ME3	FALSE	FALSE	35.9331	5.87258	30.0605	-24.1879	66.406	24.9507	41.4554	-16.5047	0.16973	0.088126	-0.0263827	Y3804_ARATH	Probably inactive leucine-rich repeat receptor-like protein kinase At3g28040		integral component of membrane [GO:0016021]	ATP binding [GO:0005524]; protein kinase activity [GO:0004672]	FALSE	FALSE	HUMMINGBIRD	0	HUMMINGBIRD	BUTTERFLY
cluster10302_1rr.inclade1.ortho1.tre	ME24	ME39	FALSE	FALSE	18.6294	4.17435	14.4551	-10.2808	19.0008	1.44309	17.5577	-16.1146	0.4221	-0.0116867	-0.0621982	NA	NA	NA	NA	NA	FALSE	FALSE	0	0	0	0
cluster10303_1rr.inclade1.ortho1.tre	ME26	ME11	FALSE	TRUE	4.04361	0.968701	3.07491	-2.10621	3.10526	0.442256	2.66301	-2.22075	0.272	-0.0382565	0.00711511	PP125_ARATH	Pentatricopeptide repeat-containing protein At1g74900, mitochondrial (Protein ORGANELLE TRANSCRIPT PROCESSING DEFECT 43)	RNA modification [GO:0009451]; RNA splicing [GO:0008380]	intracellular membrane-bounded organelle [GO:0043231]; mitochondrion [GO:0005739]	endonuclease activity [GO:0004519]; RNA binding [GO:0003723]	FALSE	TRUE	HUMMINGBIRD	HUMMINGBIRD	HUMMINGBIRD	HUMMINGBIRD
cluster10304_1rr.inclade1.ortho3.tre	ME25	ME10	FALSE	FALSE	5.05819	0.961165	4.09703	-3.13586	22.9021	5.50794	17.3942	-11.8862	0.25149	0.0509374	0.054473	PP245_ARATH	Pentatricopeptide repeat-containing protein At3g21470	RNA modification [GO:0009451]	intracellular membrane-bounded organelle [GO:0043231]	endonuclease activity [GO:0004519]; RNA binding [GO:0003723]	FALSE	FALSE	BUTTERFLY	0	BUTTERFLY	0
cluster10305_1rr.inclade1.ortho2.tre	ME12	ME2	FALSE	FALSE	9.24905	1.51865	7.7304	-6.21175	26.8912	20.5346	6.35656	14.1781	0.25882	0.0173343	-0.0195077	NA	NA	NA	NA	NA	FALSE	FALSE	0	0	0	BEE
cluster10306_1rr.inclade1.ortho2.tre	ME14	ME6	TRUE	FALSE	28.3712	13.6304	14.7408	-1.11048	47.4544	22.6202	24.8341	-2.21388	0.34552	-0.0148736	0.0409177	EF1B1_ARATH	Elongation factor 1-beta 1 (EF-1-beta 1) (Elongation factor 1-beta' 1) (EF-1-beta' 1) (Elongation factor 1B-alpha 1) (eEF-1B alpha 1)		eukaryotic translation elongation factor 1 complex [GO:0005853]; plasma membrane [GO:0005886]	translation elongation factor activity [GO:0003746]	FALSE	FALSE	HUMMINGBIRD	HUMMINGBIRD	HUMMINGBIRD	HUMMINGBIRD
cluster10307_1rr.inclade1.ortho1.tre	ME0	ME55	FALSE	FALSE	2.81891	0.821085	1.99782	-1.17674	10.0759	1.77293	8.30296	-6.53003	0.22674	-0.0054591	0.0392141	XYL2_MEDSV	Beta-xylosidase/alpha-L-arabinofuranosidase 2 (Xylan 1,4-beta-xylosidase/Alpha-L-arabinofuranosidase 2) (MsXyl2) [Includes: Beta-xylosidase (EC 3.2.1.37) (1,4-beta-D-xylan xylohydrolase) (Xylan 1,4-beta-xylosidase); Alpha-L-arabinofuranosidase (Arabinosidase) (EC 3.2.1.55)]	xylan catabolic process [GO:0045493]	extracellular region [GO:0005576]	alpha-L-arabinofuranosidase activity [GO:0046556]; xylan 1,4-beta-xylosidase activity [GO:0009044]	TRUE	FALSE	0	HUMMINGBIRD	0	HUMMINGBIRD
cluster10308_1rr.inclade1.ortho1.tre	ME14	ME6	FALSE	FALSE	31.3186	12.4387	18.8799	-6.44112	55.8982	31.1576	24.7405	6.41708	0.12032	-0.0135234	0.0289285	RL31_PERFR	60S ribosomal protein L31	translation [GO:0006412]	ribosome [GO:0005840]	structural constituent of ribosome [GO:0003735]	FALSE	FALSE	HUMMINGBIRD	HUMMINGBIRD	HUMMINGBIRD	HUMMINGBIRD
cluster10309_1rr.inclade1.ortho2.tre	ME16	ME17	FALSE	FALSE	13.4858	4.77999	8.70579	-3.9258	36.5438	13.4019	23.142	-9.74011	0.17861	0.102625	0.0151002	RPT2_ARATH	Root phototropism protein 2 (BTB/POZ domain-containing protein RPT2)	phototropism [GO:0009638]; protein ubiquitination [GO:0016567]; signal transduction [GO:0007165]	cytoplasm [GO:0005737]; nucleus [GO:0005634]		FALSE	FALSE	BUTTERFLY	BUTTERFLY	BUTTERFLY	BUTTERFLY
cluster10310_1rr.inclade1.ortho6.tre	ME0	ME10	FALSE	FALSE	1.12934	0.369929	0.759415	-0.389486	12.3788	3.46482	8.91399	-5.44917	0.34106	-0.0181919	0.025592	GLIP6_ARATH	GDSL esterase/lipase 6 (EC 3.1.1.-) (Extracellular lipase 6)	lipid catabolic process [GO:0016042]	extracellular region [GO:0005576]	lipase activity [GO:0016298]	TRUE	FALSE	0	0	0	0
cluster10311_1rr.inclade1.ortho2.tre	ME0	ME47	FALSE	FALSE	5.70162	2.67898	3.02264	-0.343666	11.7009	1.61248	10.0884	-8.47593	0.13313	-0.00429439	0.0451496	TCPH_ARATH	T-complex protein 1 subunit eta (TCP-1-eta) (CCT-eta) (Chaperonin CCT7)	'de novo' protein folding [GO:0006458]; chaperone-mediated protein folding [GO:0061077]; response to cadmium ion [GO:0046686]	chaperonin-containing T-complex [GO:0005832]; cytosol [GO:0005829]	ATP binding [GO:0005524]; protein binding involved in protein folding [GO:0044183]; unfolded protein binding [GO:0051082]	FALSE	FALSE	0	0	0	0
cluster10312_1rr.inclade1.ortho2.tre	ME6	ME5	TRUE	TRUE	45.3406	34.4003	10.9403	23.46	77.6371	58.3285	19.3086	39.0199	0.13053	0.0764394	0.0345209	VATC_ARATH	V-type proton ATPase subunit C (V-ATPase subunit C) (Vacuolar H(+)-ATPase subunit C) (Vacuolar proton pump subunit C)	ATP hydrolysis coupled proton transport [GO:0015991]; unidimensional cell growth [GO:0009826]	chloroplast [GO:0009507]; Golgi apparatus [GO:0005794]; plant-type vacuole [GO:0000325]; plasma membrane [GO:0005886]; vacuolar membrane [GO:0005774]; vacuolar proton-transporting V-type ATPase, V1 domain [GO:0000221]; vacuole [GO:0005773]	proton-exporting ATPase activity, phosphorylative mechanism [GO:0008553]	FALSE	FALSE	BEE	BEE	BEE	BEE
cluster10313_1rr.inclade1.ortho1.tre	ME48	ME5	FALSE	FALSE	7.89867	1.49555	6.40313	-4.90758	17.3617	9.65786	7.7038	1.95407	0.28665	0.0285461	0.0697292	FLP2_ARATH	Flowering-promoting factor 1-like protein 2 (FPF1-like protein 2)	regulation of flower development [GO:0009909]			FALSE	FALSE	0	BEE	0	BEE
cluster10313_2rr.inclade1.ortho1.tre	ME9	ME6	FALSE	FALSE	8.92958	2.12494	6.80464	-4.6797	24.7516	10.5184	14.2332	-3.7148	0.10294	0.0523208	0.00817162	FLP3_ORYSJ	Flowering-promoting factor 1-like protein 3 (FPF1-like protein 3)	regulation of flower development [GO:0009909]			FALSE	FALSE	HUMMINGBIRD	HUMMINGBIRD	HUMMINGBIRD	HUMMINGBIRD
cluster10314_1rr.inclade1.ortho1.tre	ME36	ME0	FALSE	FALSE	2.69001	0.269766	2.42025	-2.15048	2.65564	0.324449	2.33119	-2.00674	0.33316	-0.0075814	0.065798	PLA17_ARATH	Phospholipase A1-Igamma3, chloroplastic (EC 3.1.1.-)	lipid catabolic process [GO:0016042]	chloroplast [GO:0009507]	galactolipase activity [GO:0047714]; phosphatidylcholine 1-acylhydrolase activity [GO:0008970]; triglyceride lipase activity [GO:0004806]	TRUE	TRUE	HUMMINGBIRD	0	HUMMINGBIRD	0
cluster10314_2rr.inclade1.ortho3.tre	ME32	ME25	FALSE	FALSE	13.2148	1.77912	11.4357	-9.65658	7.04969	0.902582	6.1471	-5.24452	0.3093	0.0341515	-0.00286027	PLA16_ARATH	Phospholipase A1-Igamma2, chloroplastic (EC 3.1.1.-)	lipid catabolic process [GO:0016042]	chloroplast [GO:0009507]	galactolipase activity [GO:0047714]; phosphatidylcholine 1-acylhydrolase activity [GO:0008970]; triglyceride lipase activity [GO:0004806]	FALSE	FALSE	0	0	0	0
cluster10315_1rr.inclade1.ortho4.tre	ME1	ME2	FALSE	TRUE	25.0457	15.0074	10.0383	4.96903	56.3411	25.5793	30.7618	-5.18242	0.24023	-0.0408085	-0.0541965	ASPG1_ARATH	Protein ASPARTIC PROTEASE IN GUARD CELL 1 (AtASPG1) (EC 3.4.23.-)	protein catabolic process [GO:0030163]; response to abscisic acid [GO:0009737]; response to water deprivation [GO:0009414]; systemic acquired resistance [GO:0009627]	endoplasmic reticulum [GO:0005783]	aspartic-type endopeptidase activity [GO:0004190]; aspartic-type peptidase activity [GO:0070001]; DNA binding [GO:0003677]	FALSE	FALSE	0	0	0	BEE
cluster10316_1rr.inclade1.ortho1.tre	ME2	ME3	FALSE	FALSE	38.2486	30.5779	7.67074	22.9071	64.2849	40.9904	23.2945	17.6959	0.1012	-0.0809818	0.109729	EIF3C_MEDTR	Eukaryotic translation initiation factor 3 subunit C (eIF3c) (Eukaryotic translation initiation factor 3 subunit 8) (eIF3 p110)		eukaryotic translation initiation factor 3 complex [GO:0005852]	translation initiation factor activity [GO:0003743]; translation initiation factor binding [GO:0031369]	FALSE	FALSE	0	0	0	BUTTERFLY
cluster10317_1rr.inclade1.ortho1.tre	ME0	ME24	FALSE	FALSE	3.85871	0.613407	3.2453	-2.63189	16.8527	2.15091	14.7018	-12.5509	0.01578	-0.0427121	0.0525168	UBC4_SOLLC	Ubiquitin-conjugating enzyme E2-17 kDa (EC 2.3.2.23) (E2 ubiquitin-conjugating enzyme) (Ubiquitin carrier protein) (Ubiquitin-protein ligase)	protein ubiquitination [GO:0016567]		ATP binding [GO:0005524]; transferase activity [GO:0016740]	FALSE	FALSE	0	HUMMINGBIRD	0	HUMMINGBIRD
cluster10318_1rr.inclade1.ortho1.tre	ME10	ME12	FALSE	FALSE	33.3791	11.7414	21.6377	-9.89639	26.7266	5.60569	21.1209	-15.5152	0.52632	0.095077	0.0772209	NA	NA	NA	NA	NA	FALSE	FALSE	0	BUTTERFLY	0	BUTTERFLY
cluster10318_1rr.inclade2.ortho1.tre	ME35	ME6	FALSE	FALSE	22.2153	6.06113	16.1541	-10.093	66.1949	34.8869	31.308	3.57888	0.21521	-0.0431946	0.0013228	NA	NA	NA	NA	NA	FALSE	FALSE	0	HUMMINGBIRD	0	HUMMINGBIRD
cluster10319_1rr.inclade1.ortho2.tre	ME6	ME3	FALSE	FALSE	11.2953	4.56872	6.72662	-2.1579	21.8978	7.28539	14.6124	-7.327	0.31015	0.0442795	0.0856167	LCAT1_ARATH	Lecithin-cholesterol acyltransferase-like 1 (EC 2.3.1.-)	lipid metabolic process [GO:0006629]	integral component of membrane [GO:0016021]; vacuolar membrane [GO:0005774]; vacuole [GO:0005773]	O-acyltransferase activity [GO:0008374]	FALSE	FALSE	BEE	0	BEE	BUTTERFLY
cluster10320_1rr.inclade1.ortho2.tre	ME1	ME6	FALSE	FALSE	7.12833	1.54628	5.58205	-4.03577	25.6052	7.00687	18.5984	-11.5915	0.12507	0.0363991	-0.0450402	Y2424_ARATH	BTB/POZ domain-containing protein At2g24240	protein homooligomerization [GO:0051260]; protein ubiquitination [GO:0016567]			FALSE	FALSE	0	HUMMINGBIRD	0	HUMMINGBIRD
cluster10321_2rr.inclade1.ortho1.tre	ME29	ME10	FALSE	FALSE	4.30033	0.819121	3.4812	-2.66208	16.3269	6.66693	9.65992	-2.993	0.3722	0.024994	0.023416	UFOG5_MANES	Anthocyanidin 3-O-glucosyltransferase 5 (EC 2.4.1.115) (Flavonol 3-O-glucosyltransferase 5) (UDP-glucose flavonoid 3-O-glucosyltransferase 5)	anthocyanin-containing compound biosynthetic process [GO:0009718]		anthocyanidin 3-O-glucosyltransferase activity [GO:0047213]	FALSE	FALSE	0	0	HUMMINGBIRD	0
cluster10322_1rr.inclade1.ortho2.tre	ME3	ME2	FALSE	FALSE	30.2679	15.4316	14.8363	0.595239	73.2967	61.9887	11.308	50.6806	0.18442	-0.0976893	-0.042613	PE192_ARATH	Peroxisome biogenesis protein 19-2 (Peroxin-19-2) (AtPEX19-2) (Peroxisomal membrane protein import receptor PEX19-2)	peroxisome organization [GO:0007031]; protein targeting to peroxisome [GO:0006625]	cytosol [GO:0005829]; peroxisomal membrane [GO:0005778]	peroxisome membrane targeting sequence binding [GO:0033328]	FALSE	FALSE	0	0	BEE	BEE
cluster10323_1rr.inclade1.ortho3.tre	ME19	ME36	FALSE	FALSE	6.08008	2.36851	3.71157	-1.34306	19.0215	5.83633	13.1852	-7.3489	0.49356	0.0244117	0.032399	LHTL8_ARATH	Lysine histidine transporter-like 8 (Amino acid transporter-like protein 1)	amino acid transmembrane transport [GO:0003333]	integral component of membrane [GO:0016021]; plasma membrane [GO:0005886]	amino acid transmembrane transporter activity [GO:0015171]	FALSE	FALSE	0	0	0	0
cluster10324_1rr.inclade1.ortho1.tre	ME14	ME21	FALSE	FALSE	7.94311	1.97416	5.96895	-3.9948	17.003	2.79743	14.2056	-11.4081	0.44813	-0.0248932	0.0470212	MYB73_ARATH	Transcription factor MYB73 (Myb-related protein 73) (AtMYB73)	cell differentiation [GO:0030154]; glucosinolate metabolic process [GO:0019760]; negative regulation of response to salt stress [GO:1901001]; positive regulation of auxin mediated signaling pathway [GO:0010929]; regulation of transcription, DNA-templated [GO:0006355]; regulation of transcription by RNA polymerase II [GO:0006357]; response to abscisic acid [GO:0009737]; response to cadmium ion [GO…	nucleus [GO:0005634]	DNA-binding transcription factor activity [GO:0003700]; RNA polymerase II transcription factor activity, sequence-specific DNA binding [GO:0000981]; sequence-specific DNA binding [GO:0043565]; transcription factor activity, RNA polymerase II transcription factor recruiting [GO:0001135]; transcription regulatory region DNA binding [GO:0044212]	FALSE	FALSE	HUMMINGBIRD	HUMMINGBIRD	HUMMINGBIRD	HUMMINGBIRD
cluster10324_1rr.inclade1.ortho3.tre	ME24	ME1	FALSE	FALSE	47.7423	12.4011	35.3412	-22.9401	71.5533	45.7637	25.7895	19.9742	0.1645	-0.0698333	-0.0053894	MYB73_ARATH	Transcription factor MYB73 (Myb-related protein 73) (AtMYB73)	cell differentiation [GO:0030154]; glucosinolate metabolic process [GO:0019760]; negative regulation of response to salt stress [GO:1901001]; positive regulation of auxin mediated signaling pathway [GO:0010929]; regulation of transcription, DNA-templated [GO:0006355]; regulation of transcription by RNA polymerase II [GO:0006357]; response to abscisic acid [GO:0009737]; response to cadmium ion [GO…	nucleus [GO:0005634]	DNA-binding transcription factor activity [GO:0003700]; RNA polymerase II transcription factor activity, sequence-specific DNA binding [GO:0000981]; sequence-specific DNA binding [GO:0043565]; transcription factor activity, RNA polymerase II transcription factor recruiting [GO:0001135]; transcription regulatory region DNA binding [GO:0044212]	FALSE	FALSE	0	0	0	0
cluster10326_1rr.inclade1.ortho5.tre	ME28	ME10	FALSE	FALSE	2.77217	0.472743	2.29943	-1.82669	14.0502	3.66002	10.3902	-6.73017	0.46058	-0.0274226	0.0379819	DRL4_ARATH	Putative disease resistance protein At1g50180	defense response [GO:0006952]; signal transduction [GO:0007165]	plasma membrane [GO:0005886]; plasmodesma [GO:0009506]	ADP binding [GO:0043531]; ATP binding [GO:0005524]	TRUE	FALSE	HUMMINGBIRD	0	HUMMINGBIRD	0
cluster10327_1rr.inclade1.ortho1.tre	ME2	ME23	FALSE	FALSE	17.3576	9.7376	7.62001	2.11759	7.98496	0.768256	7.2167	-6.44845	0.12313	-0.0328301	0.0325273	CAF1G_ARATH	Probable CCR4-associated factor 1 homolog 7 (EC 3.1.13.4)	exonucleolytic nuclear-transcribed mRNA catabolic process involved in deadenylation-dependent decay [GO:0043928]; negative regulation of translation [GO:0017148]; regulation of transcription, DNA-templated [GO:0006355]; transcription, DNA-templated [GO:0006351]	CCR4-NOT core complex [GO:0030015]; nucleus [GO:0005634]; P-body [GO:0000932]	metal ion binding [GO:0046872]; poly(A)-specific ribonuclease activity [GO:0004535]; RNA binding [GO:0003723]	FALSE	FALSE	0	BUTTERFLY	0	BUTTERFLY
cluster10328_1rr.inclade1.ortho1.tre	ME23	ME12	FALSE	FALSE	5.95132	1.65895	4.29237	-2.63342	19.1652	4.53517	14.63	-10.0948	0.31317	0.028875	0.0156099	FD4L1_ARATH	Fatty acid desaturase 4-like 1, chloroplastic (FAD4-L1) (EC 1.14.19.-)	fatty acid metabolic process [GO:0006631]; protein polyubiquitination [GO:0000209]; ubiquitin-dependent ERAD pathway [GO:0030433]	chloroplast membrane [GO:0031969]; endoplasmic reticulum [GO:0005783]; integral component of membrane [GO:0016021]	oxidoreductase activity [GO:0016491]; ubiquitin protein ligase activity [GO:0061630]; ubiquitin protein ligase binding [GO:0031625]	FALSE	FALSE	BUTTERFLY	BUTTERFLY	BUTTERFLY	BUTTERFLY
cluster10329_1rr.inclade1.ortho1.tre	ME31	ME1	FALSE	FALSE	22.1632	4.23136	17.9318	-13.7005	16.3157	9.40491	6.91082	2.49409	0.17601	-0.0488173	-0.0825666	TAF9_ARATH	Transcription initiation factor TFIID subunit 9 (TATA binding protein associated factor 21kDa subunit) (TBP-associated factor 9) (AtTAF9)	histone H3 acetylation [GO:0043966]; positive regulation of transcription by RNA polymerase II [GO:0045944]; RNA polymerase II transcriptional preinitiation complex assembly [GO:0051123]; transcription by RNA polymerase II [GO:0006366]	SAGA complex [GO:0000124]; transcription factor TFIID complex [GO:0005669]	protein heterodimerization activity [GO:0046982]; transcription factor binding [GO:0008134]; transcription regulatory region DNA binding [GO:0044212]	FALSE	FALSE	0	0	0	0
cluster1033_1rr.inclade1.ortho6.tre	ME33	ME5	FALSE	FALSE	5.19894	1.07675	4.12219	-3.04544	13.0564	3.50086	9.55558	-6.05472	0.58371	0.0707169	0.0739734	LPCT2_ARATH	Lysophospholipid acyltransferase LPEAT2 (EC 2.3.1.25) (Lysophosphatidylethanolamine acyltransferase 2) (AtLPEAT2)	phospholipid biosynthetic process [GO:0008654]; phospholipid metabolic process [GO:0006644]; very long-chain fatty acid metabolic process [GO:0000038]	integral component of membrane [GO:0016021]	calcium ion binding [GO:0005509]; lysophosphatidylethanolamine acyltransferase activity [GO:0071618]; plasmalogen synthase activity [GO:0050200]	FALSE	FALSE	0	BEE	0	BEE
cluster10331_1rr.inclade1.ortho3.tre	ME1	ME9	FALSE	FALSE	4.06234	1.10891	2.95343	-1.84452	17.6855	6.47332	11.2122	-4.73886	0.13831	-0.0561894	-0.102016	PLP9_ARATH	Probable inactive patatin-like protein 9 (AtPLP9) (Patatin-related phospholipase A IIIdelta) (pPLAIIId) (Phospholipase A IIIB) (AtPLAIIIB)	lipid catabolic process [GO:0016042]		hydrolase activity [GO:0016787]	FALSE	FALSE	0	0	0	0
cluster10332_1rr.inclade1.ortho1.tre	ME9	ME4	FALSE	FALSE	12.4458	3.03839	9.40742	-6.36904	40.8155	18.7724	22.0431	-3.27073	0.22544	0.0807714	0.0835731	SAMC2_ARATH	Probable S-adenosylmethionine carrier 2, chloroplastic	mitochondrial transport [GO:0006839]	chloroplast envelope [GO:0009941]; chloroplast membrane [GO:0031969]; integral component of membrane [GO:0016021]; mitochondrial inner membrane [GO:0005743]	S-adenosyl-L-methionine transmembrane transporter activity [GO:0000095]	FALSE	FALSE	HUMMINGBIRD	0	HUMMINGBIRD	0
cluster10332_2rr.inclade1.ortho2.tre	ME12	ME16	FALSE	TRUE	14.3705	6.95873	7.41176	-0.453026	11.9413	2.77426	9.16699	-6.39274	0.19045	0.0278347	-0.00575608	SAMC2_ARATH	Probable S-adenosylmethionine carrier 2, chloroplastic	mitochondrial transport [GO:0006839]	chloroplast envelope [GO:0009941]; chloroplast membrane [GO:0031969]; integral component of membrane [GO:0016021]; mitochondrial inner membrane [GO:0005743]	S-adenosyl-L-methionine transmembrane transporter activity [GO:0000095]	FALSE	FALSE	0	0	0	0
cluster10335_1rr.inclade1.ortho1.tre	ME26	ME11	FALSE	FALSE	3.72453	0.755713	2.96882	-2.21311	4.35056	1.33682	3.01373	-1.67691	0.23977	-0.0592136	-0.105413	P2C40_ARATH	Probable protein phosphatase 2C 40 (AtPP2C40) (EC 3.1.3.16) (Protein phosphatase 2C homolog 1)			metal ion binding [GO:0046872]; protein serine/threonine phosphatase activity [GO:0004722]	FALSE	TRUE	HUMMINGBIRD	HUMMINGBIRD	HUMMINGBIRD	HUMMINGBIRD
cluster10336_1rr.inclade2.ortho2.tre	ME0	ME28	FALSE	FALSE	1.392	0.503057	0.888945	-0.385888	2.51083	0.278731	2.23209	-1.95336	0.40534	-0.026399	0.0594521	EXPA8_ARATH	Expansin-A8 (AtEXPA8) (Alpha-expansin-8) (At-EXP8) (AtEx8) (Ath-ExpAlpha-1.11)	plant-type cell wall organization [GO:0009664]; syncytium formation [GO:0006949]	cell wall [GO:0005618]; extracellular region [GO:0005576]; membrane [GO:0016020]		TRUE	TRUE	0	0	0	0
cluster10337_1rr.inclade1.ortho1.tre	ME2	ME28	FALSE	TRUE	2.82076	0.955434	1.86532	-0.909888	3.60588	0.621127	2.98475	-2.36362	0.40343	-0.00991041	0.0481245	VQ4_ARATH	VQ motif-containing protein 4 (AtVQ4) (MPK3/6-targeted VQ-motif-containing protein 1)	defense response [GO:0006952]; negative regulation of cellular defense response [GO:0051245]; negative regulation of DNA-binding transcription factor activity [GO:0043433]	nucleus [GO:0005634]		TRUE	TRUE	0	0	0	0
cluster10337_1rr.inclade2.ortho2.tre	ME10	ME3	FALSE	FALSE	18.372	7.29764	11.0743	-3.7767	31.4511	14.9465	16.5046	-1.55805	0.21645	0.0722477	0.0268371	VQ4_ARATH	VQ motif-containing protein 4 (AtVQ4) (MPK3/6-targeted VQ-motif-containing protein 1)	defense response [GO:0006952]; negative regulation of cellular defense response [GO:0051245]; negative regulation of DNA-binding transcription factor activity [GO:0043433]	nucleus [GO:0005634]		FALSE	FALSE	0	0	0	BUTTERFLY
cluster10339_1rr.inclade1.ortho3.tre	ME2	ME3	FALSE	FALSE	32.0956	25.8572	6.23843	19.6188	14.7176	2.75401	11.9636	-9.20955	0.46602	-0.108483	0.00818086	NA	NA	NA	NA	NA	FALSE	FALSE	0	0	0	BUTTERFLY
cluster10340_1rr.inclade1.ortho4.tre	ME24	ME6	FALSE	TRUE	33.863	7.12927	26.7338	-19.6045	27.3049	5.14063	22.1642	-17.0236	0.30072	-0.12031	-0.0450575	HMOX1_ARATH	Heme oxygenase 1, chloroplastic (AtHO1) (EC 1.14.14.18) (Protein GENOMES UNCOUPLED 2) (Protein REVERSAL OF THE DET PHENOTYPE 4)	carotenoid biosynthetic process [GO:0016117]; cellular response to UV-C [GO:0071494]; chloroplast-nucleus signaling pathway [GO:0010019]; flavonoid biosynthetic process [GO:0009813]; heme oxidation [GO:0006788]; photosynthesis [GO:0015979]; phytochromobilin biosynthetic process [GO:0010024]; regulation of meristem growth [GO:0010075]; regulation of stomatal movement [GO:0010119]	chloroplast [GO:0009507]	heme binding [GO:0020037]; heme oxygenase (decyclizing) activity [GO:0004392]; metal ion binding [GO:0046872]	FALSE	FALSE	0	HUMMINGBIRD	0	HUMMINGBIRD
cluster10341_1rr.inclade1.ortho1.tre	ME1	ME1	FALSE	FALSE	39.6152	21.928	17.6872	4.24077	60.4811	34.2118	26.2693	7.94248	0.25828	-0.0572315	-0.0330762	CCX4_ARATH	Cation/calcium exchanger 4 (AtCCX4) (Protein CATION CALCIUM EXCHANGER 4) (Protein CATION EXCHANGER 10)	cation transport [GO:0006812]; potassium ion transport [GO:0006813]; sodium ion transport [GO:0006814]	integral component of membrane [GO:0016021]	antiporter activity [GO:0015297]	FALSE	FALSE	0	0	0	0
cluster10341_2rr.inclade1.ortho1.tre	ME26	ME48	FALSE	FALSE	27.6036	6.32556	21.2781	-14.9525	55.3528	10.1386	45.2142	-35.0756	0.15909	-0.0443014	0.000238687	CCX4_ARATH	Cation/calcium exchanger 4 (AtCCX4) (Protein CATION CALCIUM EXCHANGER 4) (Protein CATION EXCHANGER 10)	cation transport [GO:0006812]; potassium ion transport [GO:0006813]; sodium ion transport [GO:0006814]	integral component of membrane [GO:0016021]	antiporter activity [GO:0015297]	FALSE	FALSE	HUMMINGBIRD	HUMMINGBIRD	HUMMINGBIRD	HUMMINGBIRD
cluster10342_1rr.inclade1.ortho1.tre	ME20	ME0	FALSE	FALSE	24.6626	4.53447	20.1282	-15.5937	4.71911	1.241	3.47811	-2.23711	0.07917	-0.0207923	-0.0681491	NA	NA	NA	NA	NA	FALSE	FALSE	HUMMINGBIRD	0	HUMMINGBIRD	0
cluster10342_1rr.inclade2.ortho2.tre	ME5	ME8	FALSE	TRUE	13.1354	6.04071	7.09464	-1.05394	22.0752	9.38637	12.6888	-3.30243	0.1668	0.0162879	0.0371687	NA	NA	NA	NA	NA	FALSE	FALSE	HUMMINGBIRD	0	HUMMINGBIRD	0
cluster10344_1rr.inclade1.ortho2.tre	ME5	ME8	FALSE	FALSE	33.0333	23.5323	9.50105	14.0312	51.6315	28.8622	22.7693	6.0929	0.0998	0.152267	0.132034	SUI1_ORYSI	Protein translation factor SUI1 homolog (Protein GOS2) (Protein eIF1) (Translation initiation factor 1)	regulation of translation [GO:0006417]		translation initiation factor activity [GO:0003743]	FALSE	FALSE	HUMMINGBIRD	0	HUMMINGBIRD	0
cluster10345_1rr.inclade1.ortho3.tre	ME18	ME27	FALSE	FALSE	6.94031	1.74529	5.19502	-3.44973	17.3913	3.44146	13.9499	-10.5084	0.22215	-0.184392	-0.0434932	DHGY_CUCSA	Glycerate dehydrogenase (GDH) (EC 1.1.1.29) (NADH-dependent hydroxypyruvate reductase) (HPR)	oxidative photosynthetic carbon pathway [GO:0009854]	peroxisome [GO:0005777]	glycerate dehydrogenase activity [GO:0008465]; NAD binding [GO:0051287]	FALSE	FALSE	BUTTERFLY	BUTTERFLY	BUTTERFLY	BUTTERFLY
cluster10346_1rr.inclade1.ortho2.tre	ME40	ME12	FALSE	FALSE	10.4162	1.4967	8.91951	-7.4228	46.3168	10.8089	35.5079	-24.699	0.3464	-0.0220503	0.0753194	WRK35_ARATH	Probable WRKY transcription factor 35 (WRKY DNA-binding protein 35)	embryo development ending in seed dormancy [GO:0009793]; pollen development [GO:0009555]; transcription, DNA-templated [GO:0006351]	nucleus [GO:0005634]	DNA-binding transcription factor activity [GO:0003700]; sequence-specific DNA binding [GO:0043565]	FALSE	FALSE	BUTTERFLY	BUTTERFLY	BUTTERFLY	BUTTERFLY
cluster10347_1rr.inclade1.ortho2.tre	ME1	ME1	TRUE	FALSE	58.5147	43.1496	15.3651	27.7845	131.103	81.7832	49.3197	32.4636	0.16482	-0.000740173	-0.0468617	IF5Z_ARATH	Probable eukaryotic translation initiation factor 5-2 (eIF-5 2)		cytoplasm [GO:0005737]; nucleus [GO:0005634]	GTP binding [GO:0005525]; translation initiation factor activity [GO:0003743]	FALSE	FALSE	0	0	0	0
cluster10349_1rr.inclade1.ortho4.tre	ME1	ME14	FALSE	FALSE	9.65518	3.45584	6.19934	-2.7435	38.8487	10.6737	28.1749	-17.5012	0.28301	-0.120777	-0.0654581	SRG1_ARATH	Protein SRG1 (AtSRG1) (Protein SENESCENCE-RELATED GENE 1)	leaf senescence [GO:0010150]		metal ion binding [GO:0046872]; oxidoreductase activity, acting on diphenols and related substances as donors, oxygen as acceptor [GO:0016682]	FALSE	FALSE	0	HUMMINGBIRD	0	HUMMINGBIRD
cluster10351_1rr.inclade1.ortho1.tre	ME13	ME18	FALSE	FALSE	19.6131	8.05772	11.5554	-3.49766	12.9949	3.09056	9.9043	-6.81374	0.09085	0.0509327	0.0152226	EFGC2_SOYBN	Elongation factor G-2, chloroplastic (cEF-G 2)		chloroplast [GO:0009507]	GTPase activity [GO:0003924]; GTP binding [GO:0005525]; translation elongation factor activity [GO:0003746]	FALSE	FALSE	HUMMINGBIRD	HUMMINGBIRD	HUMMINGBIRD	HUMMINGBIRD
cluster10352_1rr.inclade1.ortho2.tre	ME14	ME29	FALSE	FALSE	11.0829	2.59201	8.49084	-5.89883	20.1129	2.86733	17.2456	-14.3783	0.45288	-0.0449594	0.00411544	HMA6_ARATH	Copper-transporting ATPase PAA1, chloroplastic (EC 3.6.3.54) (Protein HEAVY METAL ATPASE 6) (Protein glucose insensitive root 1)	copper ion homeostasis [GO:0055070]; copper ion transmembrane transport [GO:0035434]; photosynthetic electron transport chain [GO:0009767]	chloroplast [GO:0009507]; chloroplast envelope [GO:0009941]; chloroplast membrane [GO:0031969]; chloroplast stroma [GO:0009570]; integral component of membrane [GO:0016021]; plastid [GO:0009536]	ATP binding [GO:0005524]; cation-transporting ATPase activity [GO:0019829]; copper chaperone activity [GO:0016531]; copper ion transmembrane transporter activity [GO:0005375]	FALSE	FALSE	HUMMINGBIRD	HUMMINGBIRD	HUMMINGBIRD	HUMMINGBIRD
cluster10354_1rr.inclade1.ortho1.tre	ME7	ME7	FALSE	FALSE	55.095	23.0788	32.0161	-8.93732	79.2781	32.8998	46.3783	-13.4786	0.10105	0.207497	0.115645	APX3_ARATH	L-ascorbate peroxidase 3 (AtAPx03) (EC 1.11.1.11)	cellular response to oxidative stress [GO:0034599]; hydrogen peroxide catabolic process [GO:0042744]; response to cytokinin [GO:0009735]; response to oxidative stress [GO:0006979]; response to reactive oxygen species [GO:0000302]	chloroplast [GO:0009507]; chloroplast envelope [GO:0009941]; glyoxysomal membrane [GO:0046861]; integral component of membrane [GO:0016021]; mitochondrion [GO:0005739]; peroxisomal membrane [GO:0005778]; peroxisome [GO:0005777]; plasmodesma [GO:0009506]; plastid [GO:0009536]; vacuolar membrane [GO:0005774]; vacuole [GO:0005773]	cytochrome-c peroxidase activity [GO:0004130]; heme binding [GO:0020037]; L-ascorbate peroxidase activity [GO:0016688]; metal ion binding [GO:0046872]	FALSE	FALSE	0	0	0	0
cluster10355_1rr.inclade1.ortho1.tre	ME14	ME6	FALSE	FALSE	13.3981	3.93348	9.46464	-5.53117	21.5226	8.45508	13.0676	-4.61249	0.63408	0.0243149	-0.00276067	GRXS7_ORYSJ	Monothiol glutaredoxin-S7, chloroplastic	cation transport [GO:0006812]; cell redox homeostasis [GO:0045454]	chloroplast envelope [GO:0009941]; chloroplast stroma [GO:0009570]	2 iron, 2 sulfur cluster binding [GO:0051537]; antiporter activity [GO:0015297]; electron transfer activity [GO:0009055]; metal ion binding [GO:0046872]; protein disulfide oxidoreductase activity [GO:0015035]	FALSE	FALSE	HUMMINGBIRD	HUMMINGBIRD	HUMMINGBIRD	HUMMINGBIRD
cluster10357_1rr.inclade1.ortho2.tre	ME24	ME1	FALSE	FALSE	36.5383	6.3986	30.1397	-23.7411	4.32671	2.17491	2.15179	0.0231207	0.08238	-0.0515594	-0.0341498	CSLD5_ARATH	Cellulose synthase-like protein D5 (AtCslD5) (EC 2.4.1.-)	cell plate assembly [GO:0000919]; cellulose biosynthetic process [GO:0030244]; cell wall biogenesis [GO:0042546]; cell wall organization [GO:0071555]; plant-type cell wall organization or biogenesis [GO:0071669]; response to osmotic stress [GO:0006970]; response to salt stress [GO:0009651]; response to water deprivation [GO:0009414]; shoot system development [GO:0048367]	Golgi apparatus [GO:0005794]; Golgi membrane [GO:0000139]; integral component of membrane [GO:0016021]	cellulose synthase (UDP-forming) activity [GO:0016760]; glucosyltransferase activity [GO:0046527]; mannan synthase activity [GO:0051753]	FALSE	TRUE	0	0	0	0
cluster10358_1rr.inclade1.ortho1.tre	ME9	ME27	FALSE	FALSE	2.4612	0.709333	1.75187	-1.04254	11.9646	3.8723	8.09234	-4.22005	0.24503	-0.00932122	0.00784334	VCL22_ARATH	Vicilin-like seed storage protein At2g28490 (Globulin At2g28490)		plasmodesma [GO:0009506]	nutrient reservoir activity [GO:0045735]	TRUE	FALSE	HUMMINGBIRD	BUTTERFLY	HUMMINGBIRD	BUTTERFLY
cluster10358_2rr.inclade1.ortho1.tre	ME8	ME4	FALSE	FALSE	12.2969	6.31872	5.97818	0.340544	14.0593	5.24311	8.81623	-3.57312	0.25248	-0.0467555	-0.0455752	VCL22_ARATH	Vicilin-like seed storage protein At2g28490 (Globulin At2g28490)		plasmodesma [GO:0009506]	nutrient reservoir activity [GO:0045735]	FALSE	FALSE	0	0	0	0
cluster10359_1rr.inclade1.ortho4.tre	ME9	ME40	FALSE	FALSE	11.8317	2.85041	8.98125	-6.13083	13.0674	0.929229	12.1382	-11.2089	0.33155	0.077926	-0.0408885	NA	NA	NA	NA	NA	FALSE	FALSE	HUMMINGBIRD	BUTTERFLY	HUMMINGBIRD	BUTTERFLY
cluster10360_1rr.inclade1.ortho1.tre	ME50	ME1	FALSE	FALSE	11.4053	2.01455	9.39071	-7.37617	21.1535	10.1286	11.025	-0.896422	0.64727	-0.0146216	-0.00654292	TRXM3_ARATH	Thioredoxin M3, chloroplastic (AtTrxm3) (Protein GFP ARRESTED TRAFFICKING 1)	cell redox homeostasis [GO:0045454]; cellular response to oxidative stress [GO:0034599]; glycerol ether metabolic process [GO:0006662]; plasmodesmata-mediated intercellular transport [GO:0010497]; positive regulation of cell communication [GO:0010647]; regulation of meristem development [GO:0048509]	chloroplast [GO:0009507]; chloroplast stroma [GO:0009570]	oxidoreductase activity, acting on a sulfur group of donors, disulfide as acceptor [GO:0016671]; protein disulfide oxidoreductase activity [GO:0015035]; protein-disulfide reductase activity [GO:0047134]; thioredoxin-disulfide reductase activity [GO:0004791]	FALSE	FALSE	0	0	0	0
cluster10361_2rr.inclade1.ortho1.tre	ME5	ME43	FALSE	FALSE	55.3594	10.3959	44.9635	-34.5676	23.4726	3.25015	20.2225	-16.9723	0.1758	0.115856	0.0336132	BRL3_ARATH	Receptor-like protein kinase BRI1-like 3 (EC 2.7.10.1) (EC 2.7.11.1) (BRASSINOSTEROID INSENSITIVE 1-like protein 3)		integral component of membrane [GO:0016021]; plasma membrane [GO:0005886]	ATP binding [GO:0005524]; protein serine/threonine kinase activity [GO:0004674]; steroid binding [GO:0005496]; transmembrane receptor protein tyrosine kinase activity [GO:0004714]	FALSE	FALSE	HUMMINGBIRD	0	HUMMINGBIRD	0
cluster10362_1rr.inclade1.ortho2.tre	ME31	ME1	FALSE	FALSE	18.8107	2.73658	16.0741	-13.3375	6.62376	2.59256	4.03119	-1.43863	0.1327	-0.0452464	0.000435958	UCH2_ARATH	Ubiquitin carboxyl-terminal hydrolase 2 (EC 3.4.19.12)	protein deubiquitination [GO:0016579]; shoot system morphogenesis [GO:0010016]; ubiquitin-dependent protein catabolic process [GO:0006511]	cytoplasm [GO:0005737]; nucleus [GO:0005634]	thiol-dependent ubiquitin-specific protease activity [GO:0004843]	FALSE	FALSE	0	0	0	0
cluster10363_1rr.inclade1.ortho1.tre	ME12	ME15	FALSE	TRUE	7.83726	2.69732	5.13994	-2.44263	5.42431	1.28944	4.13487	-2.84543	0.13204	0.0164525	-0.0337199	PUB30_ARATH	U-box domain-containing protein 30 (EC 2.3.2.27) (Plant U-box protein 30) (RING-type E3 ubiquitin transferase PUB30)	cellular response to salt stress [GO:0071472]; negative regulation of response to salt stress [GO:1901001]		ubiquitin protein ligase activity [GO:0061630]	FALSE	FALSE	0	0	0	0
cluster10364_1rr.inclade1.ortho4.tre	ME23	ME12	FALSE	FALSE	12.9406	3.18178	9.75882	-6.57703	44.4385	11.9925	32.446	-20.4535	0.07715	0.0238949	0.0496834	B561G_ARATH	Cytochrome b561 and DOMON domain-containing protein At2g04850 (Protein b561A.tha7)	oxidation-reduction process [GO:0055114]	integral component of membrane [GO:0016021]	metal ion binding [GO:0046872]	FALSE	FALSE	BUTTERFLY	BUTTERFLY	BUTTERFLY	BUTTERFLY
cluster10365_1rr.inclade1.ortho1.tre	ME40	ME3	FALSE	FALSE	2.63946	0.455228	2.18423	-1.729	10.5776	3.69787	6.87971	-3.18184	0.69053	-0.0395833	0.0013634	NA	NA	NA	NA	NA	TRUE	FALSE	BUTTERFLY	0	BUTTERFLY	BUTTERFLY
cluster10365_2rr.inclade1.ortho1.tre	ME17	ME15	FALSE	FALSE	15.935	8.20451	7.73044	0.474066	12.2562	5.5519	6.70435	-1.15245	0.44152	-0.0830845	-0.01719	Y5986_ARATH	Uncharacterized protein At5g39865	cell redox homeostasis [GO:0045454]	plasma membrane [GO:0005886]	electron transfer activity [GO:0009055]; protein disulfide oxidoreductase activity [GO:0015035]	FALSE	FALSE	0	0	0	0
cluster10369_1rr.inclade1.ortho3.tre	ME10	ME1	FALSE	FALSE	13.8871	3.96329	9.92382	-5.96054	4.88798	1.33732	3.55067	-2.21335	0.47406	0.0511556	0.00735333	NA	NA	NA	NA	NA	FALSE	FALSE	0	0	0	0
cluster10370_1rr.inclade1.ortho4.tre	ME9	ME4	TRUE	FALSE	47.902	25.0008	22.9012	2.09964	12.1499	2.99554	9.15436	-6.15882	0.32853	0.0582812	0.039434	CRN_ARATH	Inactive leucine-rich repeat receptor-like protein kinase CORYNE (Protein SUPPRESSOR OF OVEREXPRESSION OF LLP1 2)	protein phosphorylation [GO:0006468]; regulation of flower development [GO:0009909]; regulation of meristem growth [GO:0010075]	integral component of membrane [GO:0016021]; plasma membrane [GO:0005886]	ATP binding [GO:0005524]; receptor serine/threonine kinase binding [GO:0033612]; signaling receptor binding [GO:0005102]	FALSE	FALSE	HUMMINGBIRD	0	HUMMINGBIRD	0
cluster10371_1rr.inclade1.ortho2.tre	ME15	ME3	FALSE	FALSE	24.4574	10.2497	14.2077	-3.95796	61.1186	39.6029	21.5157	18.0871	0.16734	0.0399841	-0.0168366	BZP53_ARATH	bZIP transcription factor 53 (AtbZIP53)	cellular response to starvation [GO:0009267]; hypotonic response [GO:0006971]; positive regulation of seed maturation [GO:2000693]; positive regulation of transcription, DNA-templated [GO:0045893]; transcription, DNA-templated [GO:0006351]	nucleus [GO:0005634]	DNA-binding transcription factor activity [GO:0003700]; nutrient reservoir activity [GO:0045735]; protein heterodimerization activity [GO:0046982]; sequence-specific DNA binding [GO:0043565]	FALSE	FALSE	0	0	0	BUTTERFLY
cluster10372_1rr.inclade1.ortho2.tre	ME44	ME32	FALSE	FALSE	15.99	2.44691	13.5431	-11.0962	14.0644	3.09963	10.9648	-7.86512	0.37617	0.0597281	-0.0450998	NA	NA	NA	NA	NA	FALSE	FALSE	0	BUTTERFLY	0	BUTTERFLY
cluster10373_1rr.inclade1.ortho2.tre	ME10	ME3	FALSE	FALSE	26.9708	11.029	15.9418	-4.91275	98.2545	61.2699	36.9847	24.2852	0.25864	0.0551775	0.0959588	NA	NA	NA	NA	NA	FALSE	FALSE	0	0	0	BUTTERFLY
cluster10374_1rr.inclade1.ortho2.tre	ME2	ME33	FALSE	TRUE	28.9346	18.4462	10.4885	7.95774	26.4976	4.74627	21.7514	-17.0051	0.14769	-0.0311483	0.053148	NA	NA	NA	NA	NA	FALSE	FALSE	0	0	0	0
cluster10375_1rr.inclade1.ortho1.tre	ME47	ME36	FALSE	FALSE	11.8653	3.62511	8.24023	-4.61512	13.7917	3.69899	10.0927	-6.39371	0.05389	-0.00469687	0.0646274	VA711_ARATH	Vesicle-associated membrane protein 711 (AtVAMP711) (v-SNARE synaptobrevin 7C) (AtVAMP7C)	exocytosis [GO:0006887]; membrane fusion [GO:0061025]; protein transport [GO:0015031]; response to abscisic acid [GO:0009737]; response to salt stress [GO:0009651]; stomatal movement [GO:0010118]; vesicle fusion [GO:0006906]	integral component of membrane [GO:0016021]; late endosome membrane [GO:0031902]; plasma membrane [GO:0005886]; SNARE complex [GO:0031201]; vacuolar membrane [GO:0005774]; vacuole [GO:0005773]	SNAP receptor activity [GO:0005484]; SNARE binding [GO:0000149]	FALSE	FALSE	0	0	0	0
cluster10376_1rr.inclade1.ortho4.tre	ME2	ME16	FALSE	FALSE	29.7831	21.6737	8.10939	13.5643	5.10658	0.953769	4.15281	-3.19904	0.6679	-0.1384	0.0310315	Y4862_ARATH	Uncharacterized protein At4g38062				FALSE	FALSE	0	0	0	0
cluster10377_1rr.inclade1.ortho2.tre	ME29	ME0	FALSE	FALSE	7.67299	1.4307	6.24229	-4.81159	22.6914	1.59603	21.0954	-19.4994	0.35433	0.080432	0.0184504	BH148_ARATH	Transcription factor bHLH148 (ATBS1 interacting factor 2) (Basic helix-loop-helix protein 148) (AtbHLH148) (bHLH 148) (Protein RSA1 INTERACTING TRANSCRIPTION FACTOR 1) (AtRITF1) (Transcription factor EN 143) (bHLH transcription factor bHLH148)	regulation of transcription, DNA-templated [GO:0006355]; response to hydrogen peroxide [GO:0042542]; response to oxidative stress [GO:0006979]; response to salt stress [GO:0009651]; transcription, DNA-templated [GO:0006351]	nucleus [GO:0005634]	DNA-binding transcription factor activity [GO:0003700]; protein dimerization activity [GO:0046983]; sequence-specific DNA binding [GO:0043565]	FALSE	FALSE	0	0	HUMMINGBIRD	0
cluster10380_1rr.inclade1.ortho8.tre	ME29	ME19	FALSE	FALSE	3.03502	0.620913	2.4141	-1.79319	4.82006	0.385503	4.43456	-4.04906	0.33175	0.0401633	-0.0668142	NA	NA	NA	NA	NA	FALSE	FALSE	0	0	HUMMINGBIRD	0
cluster10381_1rr.inclade1.ortho1.tre	ME7	ME17	FALSE	FALSE	40.844	14.8016	26.0425	-11.2409	7.64954	1.93303	5.71651	-3.78349	0.20974	0.0999449	0.0323555	PUB4_ARATH	U-box domain-containing protein 4 (EC 2.3.2.27) (Plant U-box protein 4) (RING-type E3 ubiquitin transferase PUB4)		nucleus [GO:0005634]	ubiquitin-protein transferase activity [GO:0004842]	FALSE	FALSE	0	BUTTERFLY	0	BUTTERFLY
cluster10382_1rr.inclade1.ortho1.tre	ME39	ME18	FALSE	TRUE	2.21679	0.212179	2.00461	-1.79243	14.4727	3.86161	10.6111	-6.74951	0.26409	-0.0462081	-0.0577744	TPP2_ORYSJ	Probable trehalose-phosphate phosphatase 2 (OsTPP2) (EC 3.1.3.12) (Trehalose 6-phosphate phosphatase)	trehalose biosynthetic process [GO:0005992]		trehalose-phosphatase activity [GO:0004805]	TRUE	FALSE	0	HUMMINGBIRD	BUTTERFLY	HUMMINGBIRD
cluster10383_1rr.inclade1.ortho1.tre	ME40	ME6	FALSE	FALSE	4.85873	0.75769	4.10104	-3.34335	20	6.8962	13.1038	-6.20759	0.11339	-0.0511055	0.0298819	NFYB3_ARATH	Nuclear transcription factor Y subunit B-3 (AtNF-YB-3) (Transcriptional activator HAP3C)	transcription, DNA-templated [GO:0006351]	nucleus [GO:0005634]	DNA-binding transcription factor activity [GO:0003700]; protein heterodimerization activity [GO:0046982]; sequence-specific DNA binding [GO:0043565]	FALSE	FALSE	BUTTERFLY	HUMMINGBIRD	BUTTERFLY	HUMMINGBIRD
cluster10386_1rr.inclade1.ortho1.tre	ME9	ME4	FALSE	FALSE	43.3146	20.959	22.3555	-1.39651	76.7074	46.9826	29.7247	17.2579	0.28919	0.078762	0.115465	NA	NA	NA	NA	NA	FALSE	FALSE	HUMMINGBIRD	0	HUMMINGBIRD	0
cluster10388_1rr.inclade1.ortho2.tre	ME1	ME1	FALSE	FALSE	40.6792	28.1027	12.5765	15.5262	3.72236	0.728139	2.99423	-2.26609	0.41075	-0.033646	-0.0982696	PUM7_ARATH	Putative pumilio homolog 7, chloroplastic (APUM-7) (AtPUM7)	regulation of translation [GO:0006417]	chloroplast [GO:0009507]; cytoplasm [GO:0005737]	RNA binding [GO:0003723]	FALSE	TRUE	0	0	0	0
cluster10389_1rr.inclade1.ortho2.tre	ME4	ME4	FALSE	FALSE	14.3541	1.8557	12.4984	-10.6427	24.5258	7.50507	17.0207	-9.51568	0.01097	0.198214	0.111915	RAB7_PEA	Ras-related protein Rab7	protein transport [GO:0015031]	plasma membrane [GO:0005886]	GTPase activity [GO:0003924]; GTP binding [GO:0005525]	FALSE	FALSE	0	0	0	0
cluster1039_1rr.inclade1.ortho2.tre	ME19	ME32	FALSE	FALSE	8.70595	3.84907	4.85688	-1.0078	11.0304	2.14081	8.88955	-6.74874	0.23572	0.0810724	0.0925328	FTSH8_ORYSJ	ATP-dependent zinc metalloprotease FTSH 8, mitochondrial (OsFTSH8) (EC 3.4.24.-)		integral component of membrane [GO:0016021]; mitochondrion [GO:0005739]	ATP binding [GO:0005524]; metalloendopeptidase activity [GO:0004222]; zinc ion binding [GO:0008270]	FALSE	FALSE	0	BUTTERFLY	0	BUTTERFLY
cluster1039_1rr.inclade2.ortho10.tre	ME0	ME27	FALSE	FALSE	5.25998	2.77778	2.4822	0.295574	8.81238	1.4428	7.36959	-5.92679	0.55133	-0.0334724	-0.0372973	FTSHA_ARATH	ATP-dependent zinc metalloprotease FTSH 10, mitochondrial (AtFTSH10) (EC 3.4.24.-)		chloroplast thylakoid membrane [GO:0009535]; integral component of membrane [GO:0016021]; mitochondrial inner membrane [GO:0005743]; mitochondrion [GO:0005739]; plastid [GO:0009536]	ATP binding [GO:0005524]; metalloendopeptidase activity [GO:0004222]; zinc ion binding [GO:0008270]	FALSE	FALSE	0	BUTTERFLY	0	BUTTERFLY
cluster1039_1rr.inclade2.ortho8.tre	ME3	ME2	FALSE	FALSE	17.9703	9.47687	8.49339	0.98348	16.6629	11.2609	5.402	5.85894	0.18997	-0.0966886	-0.11498	FTSH8_ORYSJ	ATP-dependent zinc metalloprotease FTSH 8, mitochondrial (OsFTSH8) (EC 3.4.24.-)		integral component of membrane [GO:0016021]; mitochondrion [GO:0005739]	ATP binding [GO:0005524]; metalloendopeptidase activity [GO:0004222]; zinc ion binding [GO:0008270]	FALSE	FALSE	0	0	BEE	BEE
cluster10392_1rr.inclade1.ortho1.tre	ME48	ME52	TRUE	FALSE	27.2578	7.00355	20.2543	-13.2507	49.9784	8.35105	41.6273	-33.2763	0.16052	0.0621702	0.0455602	HMGB1_ARATH	High mobility group B protein 1 (High mobility group protein A) (AtHMGalpha) (HMG alpha) (Nucleosome/chromatin assembly factor group D 01) (Nucleosome/chromatin assembly factor group D 1)	chromatin assembly or disassembly [GO:0006333]	chromatin [GO:0000785]; nucleus [GO:0005634]	chromatin binding [GO:0003682]; DNA binding [GO:0003677]; DNA-binding transcription factor activity [GO:0003700]; structural constituent of chromatin [GO:0030527]	FALSE	FALSE	0	0	0	0
cluster10393_1rr.inclade1.ortho3.tre	ME0	ME18	FALSE	FALSE	12.3206	1.87765	10.4429	-8.56526	13.3535	1.98958	11.3639	-9.37433	0.3837	0.115652	0.0244562	RK9_WHEAT	50S ribosomal protein L9, chloroplastic (CL9)	translation [GO:0006412]	chloroplast [GO:0009507]; ribosome [GO:0005840]	rRNA binding [GO:0019843]; structural constituent of ribosome [GO:0003735]	FALSE	FALSE	0	HUMMINGBIRD	0	HUMMINGBIRD
cluster10396_1rr.inclade1.ortho2.tre	ME7	ME3	FALSE	FALSE	21.194	8.72734	12.4667	-3.73933	8.76563	4.87004	3.89559	0.974447	0.40983	0.0653671	0.0581782	VAR3_ARATH	Zinc finger protein VAR3, chloroplastic (Organelle Zinc finger 1) (Protein VARIEGATED 3)	chloroplast mRNA modification [GO:1900871]; chloroplast organization [GO:0009658]; mRNA processing [GO:0006397]	chloroplast [GO:0009507]; chloroplast stroma [GO:0009570]	metal ion binding [GO:0046872]	FALSE	FALSE	0	0	0	BUTTERFLY
cluster10398_1rr.inclade1.ortho5.tre	ME0	ME2	FALSE	FALSE	2.38641	1.06762	1.31878	-0.251157	4.34462	1.79751	2.54711	-0.749602	0.6137	0.00419209	0.031434	RTNLL_ARATH	Reticulon-like protein B12 (AtRTNLB12)		endoplasmic reticulum membrane [GO:0005789]; integral component of membrane [GO:0016021]		TRUE	TRUE	0	0	0	BEE
cluster10399_1rr.inclade1.ortho3.tre	ME38	ME45	FALSE	FALSE	14.1696	3.0786	11.091	-8.01245	24.6743	4.62924	20.0451	-15.4158	0.22192	-0.126961	-0.0635336	FRS6_ARATH	Protein FAR1-RELATED SEQUENCE 6	far-ME6 light signaling pathway [GO:0010018]; positive regulation of circadian rhythm [GO:0042753]; positive regulation of transcription, DNA-templated [GO:0045893]; ME6, far-ME6 light phototransduction [GO:0009585]	nucleus [GO:0005634]	DNA-binding transcription factor activity [GO:0003700]; zinc ion binding [GO:0008270]	FALSE	FALSE	0	0	0	0
cluster104_1rr.inclade1.ortho1.tre	ME0	ME5	FALSE	FALSE	6.93932	1.90999	5.02933	-3.11935	19.3418	6.77741	12.5644	-5.78695	0.37508	-0.0282878	0.0376463	WRK46_HORVU	WRKY transcription factor SUSIBA2 (Sugar signaling in barley 2) (WRKY transcription factor 46)	transcription, DNA-templated [GO:0006351]	nucleus [GO:0005634]	DNA-binding transcription factor activity [GO:0003700]; sequence-specific DNA binding [GO:0043565]	FALSE	FALSE	0	BEE	0	BEE
cluster10401_1rr.inclade1.ortho1.tre	ME4	ME23	FALSE	TRUE	24.5089	7.16665	17.3423	-10.1756	6.40449	1.16354	5.24095	-4.07741	0.22495	0.0381811	0.0401185	FB270_ARATH	F-box protein At5g39250	proteasome-mediated ubiquitin-dependent protein catabolic process [GO:0043161]	ubiquitin ligase complex [GO:0000151]		FALSE	FALSE	0	BUTTERFLY	0	BUTTERFLY
cluster10402_1rr.inclade1.ortho2.tre	ME15	ME3	FALSE	FALSE	6.93298	1.41032	5.52265	-4.11233	18.8571	10.8186	8.03852	2.78008	0.32189	0.0642866	0.0614537	BAG1_ARATH	BAG family molecular chaperone regulator 1 (Bcl-2-associated athanogene 1)	cytoplasm protein quality control by the ubiquitin-proteasome system [GO:0071629]	cytosol [GO:0005829]; mitochondrion [GO:0005739]; nucleus [GO:0005634]	chaperone binding [GO:0051087]	FALSE	FALSE	0	0	0	BUTTERFLY
cluster10404_1rr.inclade1.ortho4.tre	ME16	ME12	FALSE	TRUE	17.9369	4.63448	13.3025	-8.66798	12.0001	4.4702	7.52994	-3.05974	0.52949	0.0221038	-0.00285097	BIG1B_ARATH	Protein BIG GRAIN 1-like B	auxin-activated signaling pathway [GO:0009734]; auxin transport [GO:0060918]; positive regulation of auxin mediated signaling pathway [GO:0010929]	plasma membrane [GO:0005886]		FALSE	FALSE	BUTTERFLY	BUTTERFLY	BUTTERFLY	BUTTERFLY
cluster10404_2rr.inclade1.ortho1.tre	ME8	ME4	FALSE	FALSE	3.76274	0.981559	2.78118	-1.79962	17.3642	8.93995	8.42426	0.515689	0.2045	0.00294259	-0.0512282	BIG1B_ARATH	Protein BIG GRAIN 1-like B	auxin-activated signaling pathway [GO:0009734]; auxin transport [GO:0060918]; positive regulation of auxin mediated signaling pathway [GO:0010929]	plasma membrane [GO:0005886]		FALSE	FALSE	0	0	0	0
cluster10407_1rr.inclade1.ortho1.tre	ME4	ME28	FALSE	FALSE	23.745	8.55816	15.1868	-6.62867	14.823	1.52219	13.3009	-11.7787	0.083	0.0648636	0.0218391	SNF12_ARATH	SWI/SNF complex component SNF12 homolog	chromatin organization [GO:0006325]; DNA repair [GO:0006281]; regulation of flower development [GO:0009909]; regulation of gene expression [GO:0010468]; regulation of leaf development [GO:2000024]; regulation of transcription, DNA-templated [GO:0006355]; response to UV-B [GO:0010224]; root development [GO:0048364]; transcription, DNA-templated [GO:0006351]	nucleus [GO:0005634]		FALSE	FALSE	0	0	0	0
cluster10408_1rr.inclade1.ortho3.tre	ME17	ME15	FALSE	FALSE	6.14986	1.73708	4.41278	-2.6757	22.1961	6.25738	15.9387	-9.68134	0.22373	-0.0332727	-0.087241	NA	NA	NA	NA	NA	FALSE	FALSE	0	0	0	0
cluster10409_1rr.inclade1.ortho3.tre	ME2	ME44	TRUE	FALSE	63.7598	53.0494	10.7104	42.339	14.4839	2.58928	11.8947	-9.30538	0.21664	-0.0596081	-0.0653251	CEPR2_ARATH	Receptor protein-tyrosine kinase CEPR2 (EC 2.7.10.1) (Protein C-TERMINALLY ENCODED PEPTIDE RECEPTOR 2)	nitrate import [GO:1902025]; regulation of root development [GO:2000280]; regulation of shoot system development [GO:0048831]; response to mannitol [GO:0010555]; response to nitrate starvation [GO:0090548]; response to osmotic stress [GO:0006970]	integral component of membrane [GO:0016021]; plasma membrane [GO:0005886]	ATP binding [GO:0005524]; peptide binding [GO:0042277]; peptide hormone binding [GO:0017046]; peptide receptor activity [GO:0001653]; protein serine/threonine kinase activity [GO:0004674]; transmembrane receptor protein tyrosine kinase activity [GO:0004714]	FALSE	FALSE	0	0	0	0
cluster10411_1rr.inclade1.ortho1.tre	ME0	ME10	FALSE	FALSE	4.69788	0.328642	4.36924	-4.0406	6.04509	1.53084	4.51425	-2.98342	0.66615	0.0120561	-0.0973662	NA	NA	NA	NA	NA	FALSE	FALSE	0	0	0	0
cluster10412_1rr.inclade1.ortho1.tre	ME3	ME2	FALSE	FALSE	11.939	7.75801	4.18099	3.57702	56.7862	49.8015	6.98475	42.8167	0.6366	-0.026502	-0.00956037	NA	NA	NA	NA	NA	FALSE	FALSE	0	0	BEE	BEE
cluster10413_1rr.inclade1.ortho3.tre	ME6	ME5	TRUE	FALSE	42.6101	31.2934	11.3167	19.9767	73.7667	54.8761	18.8906	35.9856	0.39518	0.0662123	0.0133604	FB252_ARATH	F-box protein At5g06550	histone H4-R3 methylation [GO:0043985]; positive regulation of seed germination [GO:0010030]	nucleus [GO:0005634]	proximal promoter sequence-specific DNA binding [GO:0000987]	FALSE	FALSE	BEE	BEE	BEE	BEE
cluster10414_1rr.inclade1.ortho1.tre	ME0	ME40	FALSE	FALSE	9.30763	3.30755	6.00007	-2.69252	9.93327	1.75445	8.17882	-6.42437	0.36536	0.0244282	0.0368924	NA	NA	NA	NA	NA	FALSE	FALSE	0	BUTTERFLY	0	BUTTERFLY
cluster10415_1rr.inclade1.ortho1.tre	ME6	ME31	FALSE	FALSE	25.9389	9.20131	16.7376	-7.53624	34.4052	10.3553	24.0499	-13.6946	0.25899	-0.0250734	0.0311969	AL3F1_ARATH	Aldehyde dehydrogenase family 3 member F1 (EC 1.2.1.3)	cellular aldehyde metabolic process [GO:0006081]	endoplasmic reticulum [GO:0005783]; membrane [GO:0016020]	aldehyde dehydrogenase (NAD) activity [GO:0004029]; glyceraldehyde-3-phosphate dehydrogenase (NAD+) (non-phosphorylating) activity [GO:0043878]	FALSE	FALSE	BEE	0	BEE	0
cluster10416_1rr.inclade1.ortho2.tre	ME17	ME15	TRUE	TRUE	31.6796	19.3213	12.3583	6.96309	36.7544	8.84892	27.9055	-19.0566	0.3488	-0.0254651	-0.079595	ITPK1_ARATH	Inositol-tetrakisphosphate 1-kinase 1 (EC 2.7.1.134) (Inositol 1,3,4-trisphosphate 5/6-kinase 1) (AtItpk-1) (Inositol-triphosphate 5/6-kinase 1) (Ins(1,3,4)P(3) 5/6-kinase 1) (EC 2.7.1.159)	inositol phosphorylation [GO:0052746]; inositol trisphosphate metabolic process [GO:0032957]; myo-inositol hexakisphosphate biosynthetic process [GO:0010264]	cytosol [GO:0005829]	ATP binding [GO:0005524]; inositol-1,3,4-trisphosphate 5-kinase activity [GO:0052726]; inositol-1,3,4-trisphosphate 6-kinase activity [GO:0052725]; inositol tetrakisphosphate 1-kinase activity [GO:0047325]; magnesium ion binding [GO:0000287]	FALSE	FALSE	0	0	0	0
cluster10417_1rr.inclade1.ortho2.tre	ME15	ME4	FALSE	FALSE	13.2538	4.43093	8.82291	-4.39197	59.6372	27.103	32.5342	-5.43119	0.28425	0.00057268	0.0560453	PYL9_ARATH	Abscisic acid receptor PYL9 (ABI1-binding protein 4) (PYR1-like protein 9) (Regulatory components of ABA receptor 1)	abscisic acid-activated signaling pathway [GO:0009738]	cytoplasm [GO:0005737]; nucleus [GO:0005634]; plasma membrane [GO:0005886]	abscisic acid binding [GO:0010427]; protein homodimerization activity [GO:0042803]; protein phosphatase inhibitor activity [GO:0004864]; signaling receptor activity [GO:0038023]	FALSE	FALSE	0	0	0	0
cluster10417_1rr.inclade2.ortho1.tre	ME37	ME31	FALSE	FALSE	9.9861	2.0256	7.9605	-5.93489	29.2295	5.9025	23.327	-17.4245	0.41188	-0.0489209	0.0626755	PYL5_ORYSJ	Abscisic acid receptor PYL5 (PYR1-like protein 11) (OsPYL11) (PYR1-like protein 5) (OsPYL5) (Regulatory components of ABA receptor 5)	abscisic acid-activated signaling pathway [GO:0009738]; negative regulation of protein serine/threonine phosphatase activity [GO:1905183]; response to osmotic stress [GO:0006970]; response to salt stress [GO:0009651]; response to water deprivation [GO:0009414]; seed germination [GO:0009845]; seedling development [GO:0090351]	cytosol [GO:0005829]; nucleus [GO:0005634]	protein phosphatase inhibitor activity [GO:0004864]	FALSE	FALSE	BUTTERFLY	0	BUTTERFLY	0
cluster10419_1rr.inclade1.ortho1.tre	ME2	ME1	FALSE	FALSE	32.5513	22.2809	10.2704	12.0105	34.4678	18.0626	16.4051	1.65753	0.3619	-0.0955059	-0.108093	NA	NA	NA	NA	NA	FALSE	FALSE	0	0	0	0
cluster1042_1rr.inclade1.ortho5.tre	ME2	ME1	FALSE	FALSE	42.4706	23.7495	18.7211	5.02844	83.248	56.8491	26.3989	30.4502	0.34949	-0.112399	0.00167672	PTR6_ARATH	Protein NRT1/ PTR FAMILY 1.2 (AtNPF1.2) (Nitrate transporter 1.11)	nitrate transport [GO:0015706]	integral component of membrane [GO:0016021]; plasma membrane [GO:0005886]	low-affinity nitrate transmembrane transporter activity [GO:0080054]	FALSE	FALSE	0	0	0	0
cluster10421_1rr.inclade1.ortho2.tre	ME40	ME17	TRUE	FALSE	24.5296	7.36255	17.167	-9.80446	33.2974	11.3499	21.9475	-10.5976	0.49799	-0.10766	-0.0580035	ARF2A_SOLLC	Auxin response factor 2A (SlARF2A)	auxin-activated signaling pathway [GO:0009734]; fruit ripening [GO:0009835]; fruit ripening, climacteric [GO:0009836]; positive regulation of flower development [GO:0009911]; regulation of transcription, DNA-templated [GO:0006355]; transcription, DNA-templated [GO:0006351]	nucleus [GO:0005634]	DNA binding [GO:0003677]; protein heterodimerization activity [GO:0046982]; protein homodimerization activity [GO:0042803]	FALSE	FALSE	BUTTERFLY	BUTTERFLY	BUTTERFLY	BUTTERFLY
cluster10422_1rr.inclade1.ortho2.tre	ME45	ME44	FALSE	FALSE	5.9525	0.44843	5.50407	-5.05564	19.3798	3.14877	16.231	-13.0822	0.54873	-0.0841492	-0.0207884	ATL22_ARATH	RING-H2 finger protein ATL22 (EC 2.3.2.27) (RING-type E3 ubiquitin transferase ATL22)	proteasome-mediated ubiquitin-dependent protein catabolic process [GO:0043161]	integral component of membrane [GO:0016021]	metal ion binding [GO:0046872]; ubiquitin protein ligase activity [GO:0061630]	FALSE	FALSE	HUMMINGBIRD	0	HUMMINGBIRD	0
cluster10425_1rr.inclade1.ortho1.tre	ME3	ME2	TRUE	FALSE	35.9555	30.0665	5.88903	24.1775	36.9031	28.0133	8.88982	19.1235	0.0001	-0.0734548	-0.128947	LSM7_ARATH	Sm-like protein LSM7 (AtLSM7) (Protein EMBRYO DEFECTIVE 2816) (U6 snRNA-associated Sm-like protein LSM7)	mRNA splicing, via spliceosome [GO:0000398]; nuclear-transcribed mRNA catabolic process [GO:0000956]; RNA processing [GO:0006396]	catalytic step 2 spliceosome [GO:0071013]; cytoplasm [GO:0005737]; Lsm1-7-Pat1 complex [GO:1990726]; spliceosomal tri-snRNP complex [GO:0097526]; U12-type spliceosomal complex [GO:0005689]; U2-type prespliceosome [GO:0071004]; U6 snRNP [GO:0005688]	RNA binding [GO:0003723]	FALSE	FALSE	0	0	BEE	BEE
cluster10428_1rr.inclade1.ortho2.tre	ME2	ME33	FALSE	TRUE	34.0445	25.5093	8.5352	16.9741	24.1777	4.83769	19.34	-14.5023	0.24958	-0.0447286	0.0337107	NA	NA	NA	NA	NA	FALSE	FALSE	0	0	0	0
cluster10429_1rr.inclade1.ortho2.tre	ME0	ME22	FALSE	FALSE	12.2957	1.30871	10.987	-9.67826	12.8585	1.94233	10.9162	-8.97388	0.77478	0.109007	-0.0901063	GAUT7_ARATH	Probable galacturonosyltransferase 7 (EC 2.4.1.-) (Like glycosyl transferase 7)	cell wall organization [GO:0071555]; pectin biosynthetic process [GO:0045489]	endosome [GO:0005768]; Golgi apparatus [GO:0005794]; Golgi membrane [GO:0000139]; integral component of membrane [GO:0016021]; trans-Golgi network [GO:0005802]	polygalacturonate 4-alpha-galacturonosyltransferase activity [GO:0047262]	FALSE	FALSE	0	HUMMINGBIRD	0	HUMMINGBIRD
cluster10430_1rr.inclade1.ortho1.tre	ME0	ME7	FALSE	FALSE	1.21581	0.155715	1.0601	-0.904381	6.44873	1.83885	4.60988	-2.77103	0.43765	0.0354942	0.0774757	DOF14_ARATH	Dof zinc finger protein DOF1.4 (AtDOF1.4)	regulation of transcription, DNA-templated [GO:0006355]; transcription, DNA-templated [GO:0006351]	nucleus [GO:0005634]	DNA binding [GO:0003677]; metal ion binding [GO:0046872]	TRUE	FALSE	0	0	0	0
cluster10431_1rr.inclade1.ortho1.tre	ME1	ME45	FALSE	FALSE	11.611	3.11853	8.49248	-5.37395	16.6551	2.97111	13.684	-10.7128	0.17163	0.00241588	-0.0565069	NA	NA	NA	NA	NA	FALSE	FALSE	0	0	0	0
cluster10432_1rr.inclade1.ortho1.tre	ME1	ME44	FALSE	FALSE	4.83687	2.66099	2.17588	0.485107	24.4941	6.78122	17.7129	-10.9317	0.1756	-0.0674426	-0.0215332	MDHP_ARATH	Malate dehydrogenase, chloroplastic (EC 1.1.1.37) (Chloroplastic malate dehydrogenase) (Chloroplastic MDH) (cpNAD-MDH) (Plastidic NAD-dependent malate dehydrogenase) (pNAD-MDH)	carbohydrate metabolic process [GO:0005975]; embryo development ending in seed dormancy [GO:0009793]; malate metabolic process [GO:0006108]; response to cold [GO:0009409]; response to cytokinin [GO:0009735]; tricarboxylic acid cycle [GO:0006099]	apoplast [GO:0048046]; chloroplast [GO:0009507]; chloroplast envelope [GO:0009941]; chloroplast stroma [GO:0009570]; membrane [GO:0016020]; mitochondrion [GO:0005739]; plastid [GO:0009536]; plastid stroma [GO:0009532]; stromule [GO:0010319]; vacuolar membrane [GO:0005774]	L-malate dehydrogenase activity [GO:0030060]; NAD(P)+ transhydrogenase activity [GO:0008746]	FALSE	FALSE	0	0	0	0
cluster10433_1rr.inclade1.ortho1.tre	ME4	ME3	FALSE	FALSE	4.50026	1.29879	3.20147	-1.90268	4.32451	1.7564	2.5681	-0.8117	0.14737	0.017879	0.0628312	NA	NA	NA	NA	NA	FALSE	TRUE	0	0	0	BUTTERFLY
cluster10435_1rr.inclade1.ortho3.tre	ME0	ME52	FALSE	FALSE	3.53534	1.81051	1.72483	0.0856725	7.1973	1.14226	6.05505	-4.91279	0.45569	0.0171714	-0.0316393	PLDA4_ARATH	Phospholipase D alpha 4 (AtPLDalpha4) (PLD alpha 4) (EC 3.1.4.4) (PLDalpha3) (Phospholipase D epsilon) (AtPLDepsilon) (PLD epsilon)	cell division [GO:0051301]; cellular response to nitrogen starvation [GO:0006995]; cellular response to phosphate starvation [GO:0016036]; cellular response to potassium ion starvation [GO:0051365]; multidimensional cell growth [GO:0009825]; phosphatidylcholine metabolic process [GO:0046470]; phospholipid catabolic process [GO:0009395]; positive regulation of nitrogen utilization [GO:0045848]; po…	plasma membrane [GO:0005886]	calcium ion binding [GO:0005509]; N-acylphosphatidylethanolamine-specific phospholipase D activity [GO:0070290]; phospholipase D activity [GO:0004630]	FALSE	FALSE	0	0	0	0
cluster10436_1rr.inclade1.ortho2.tre	ME16	ME0	FALSE	FALSE	10.7686	3.81076	6.95784	-3.14708	15.7183	0.822205	14.8961	-14.0739	0.51705	0.0381458	-0.0141865	MBD9_ARATH	Methyl-CpG-binding domain-containing protein 9 (AtMBD9) (MBD09) (EC 2.3.1.48) (Histone acetyl transferase MBD9) (Methyl-CpG-binding protein MBD9)	histone acetylation [GO:0016573]; histone H3 acetylation [GO:0043966]; histone H4 acetylation [GO:0043967]; maintenance of DNA methylation [GO:0010216]; photoperiodism, flowering [GO:0048573]; protein ubiquitination [GO:0016567]; regulation of methylation-dependent chromatin silencing [GO:0090308]; regulation of transcription, DNA-templated [GO:0006355]; secondary shoot formation [GO:0010223]; tr…	nuclear heterochromatin [GO:0005720]; nucleus [GO:0005634]; plasmodesma [GO:0009506]	histone acetyltransferase activity [GO:0004402]; histone binding [GO:0042393]; metal ion binding [GO:0046872]; methyl-CpG binding [GO:0008327]; ubiquitin protein ligase activity [GO:0061630]	FALSE	FALSE	BUTTERFLY	0	BUTTERFLY	0
cluster10437_1rr.inclade1.ortho2.tre	ME3	ME2	TRUE	TRUE	59.2682	47.1592	12.109	35.0502	81.5775	73.3882	8.18934	65.1989	0.1596	-0.119453	-0.00308145	Y1848_ARATH	Probable inactive receptor kinase At1g48480		integral component of membrane [GO:0016021]; plasma membrane [GO:0005886]; plasmodesma [GO:0009506]; vacuolar membrane [GO:0005774]	ATP binding [GO:0005524]; protein kinase activity [GO:0004672]	FALSE	FALSE	0	0	BEE	BEE
cluster10438_1rr.inclade1.ortho4.tre	ME0	ME40	FALSE	FALSE	9.46895	1.64206	7.82689	-6.18483	13.5101	2.38824	11.1219	-8.73364	0.19473	0.122352	0.0375195	ACOX2_ARATH	Acyl-coenzyme A oxidase 2, peroxisomal (AOX 2) (EC 1.3.3.6) (Long-chain acyl-CoA oxidase) (AtCX2)	fatty acid beta-oxidation [GO:0006635]; fatty acid beta-oxidation using acyl-CoA dehydrogenase [GO:0033539]; long-chain fatty acid metabolic process [GO:0001676]	peroxisome [GO:0005777]	acyl-CoA dehydrogenase activity [GO:0003995]; acyl-CoA oxidase activity [GO:0003997]; FAD binding [GO:0071949]; flavin adenine dinucleotide binding [GO:0050660]	FALSE	FALSE	0	BUTTERFLY	0	BUTTERFLY
cluster10439_1rr.inclade1.ortho1.tre	ME6	ME5	FALSE	FALSE	37.8292	26.7022	11.127	15.5753	58.9986	36.5659	22.4327	14.1332	0.21762	0.00342508	0.0340761	CALSB_ARATH	Callose synthase 11 (EC 2.4.1.34) (1,3-beta-glucan synthase) (Protein GLUCAN SYNTHASE-LIKE 1)	(1->3)-beta-D-glucan biosynthetic process [GO:0006075]; cell wall organization [GO:0071555]; circadian rhythm [GO:0007623]; pollen development [GO:0009555]; regulation of cell shape [GO:0008360]; reproduction [GO:0000003]	1,3-beta-D-glucan synthase complex [GO:0000148]; integral component of membrane [GO:0016021]; plasma membrane [GO:0005886]	1,3-beta-D-glucan synthase activity [GO:0003843]	FALSE	FALSE	BEE	BEE	BEE	BEE
cluster1044_1rr.inclade1.ortho2.tre	ME9	ME4	FALSE	FALSE	8.15627	2.66607	5.49021	-2.82414	12.869	5.28536	7.58367	-2.29831	0.23948	0.0709541	-0.0502947	MP702_ORYSJ	Microtubule-associated protein 70-2 (AtMAP70-2) (70 kDa microtubule-associated protein 2)	cytoskeleton organization [GO:0007010]	cytoplasm [GO:0005737]; microtubule [GO:0005874]	microtubule binding [GO:0008017]	FALSE	FALSE	HUMMINGBIRD	0	HUMMINGBIRD	0
cluster1044_1rr.inclade1.ortho5.tre	ME2	ME34	FALSE	TRUE	6.40065	2.98909	3.41156	-0.422472	13.9793	2.88566	11.0936	-8.20795	0.29913	-0.0380059	0.0414529	MP702_ORYSJ	Microtubule-associated protein 70-2 (AtMAP70-2) (70 kDa microtubule-associated protein 2)	cytoskeleton organization [GO:0007010]	cytoplasm [GO:0005737]; microtubule [GO:0005874]	microtubule binding [GO:0008017]	FALSE	FALSE	0	0	0	0
cluster10440_1rr.inclade1.ortho2.tre	ME24	ME9	FALSE	FALSE	23.3771	4.21696	19.1602	-14.9432	29.8822	8.55483	21.3274	-12.7726	0.41421	-0.0581138	-0.0326776	NA	NA	NA	NA	NA	FALSE	FALSE	0	0	0	0
cluster10442_1rr.inclade1.ortho2.tre	ME28	ME10	FALSE	FALSE	9.07249	3.60377	5.46872	-1.86494	18.3092	8.06643	10.2428	-2.17634	0.56544	-0.0526963	0.00369873	CLC1_ORYSJ	Clathrin light chain 1	clathrin-dependent endocytosis [GO:0072583]; intracellular protein transport [GO:0006886]	clathrin coat of coated pit [GO:0030132]; clathrin coat of trans-Golgi network vesicle [GO:0030130]; clathrin vesicle coat [GO:0030125]	clathrin heavy chain binding [GO:0032050]; structural molecule activity [GO:0005198]	FALSE	FALSE	HUMMINGBIRD	0	HUMMINGBIRD	0
cluster10443_1rr.inclade1.ortho1.tre	ME16	ME9	FALSE	FALSE	6.4435	1.96221	4.48129	-2.51908	7.57639	1.70238	5.874	-4.17162	0.37659	0.053115	0.0162664	RZF1_ARATH	E3 ubiquitin-protein ligase RZF1 (EC 2.3.2.27) (RING-H2 zinc finger protein 1) (AtRZF1)	negative regulation of proline biosynthetic process [GO:1902006]; proteasome-mediated ubiquitin-dependent protein catabolic process [GO:0043161]; protein polyubiquitination [GO:0000209]; regulation of response to osmotic stress [GO:0047484]; regulation of response to water deprivation [GO:2000070]; response to osmotic stress [GO:0006970]; response to water deprivation [GO:0009414]; water homeosta…		metal ion binding [GO:0046872]; ubiquitin protein ligase activity [GO:0061630]; ubiquitin-protein transferase activity [GO:0004842]	FALSE	FALSE	BUTTERFLY	0	BUTTERFLY	0
cluster10444_1rr.inclade1.ortho4.tre	ME2	ME61	FALSE	FALSE	6.95395	1.03458	5.91937	-4.88478	18.0668	2.98155	15.0852	-12.1037	0.33865	0.0598256	-0.0384007	BCCP1_ARATH	Biotin carboxyl carrier protein of acetyl-CoA carboxylase 1, chloroplastic (AtBCCP1) (BCCP-1)	fatty acid biosynthetic process [GO:0006633]	acetyl-CoA carboxylase complex [GO:0009317]; chloroplast [GO:0009507]; chloroplast envelope [GO:0009941]; chloroplast stroma [GO:0009570]; plastid [GO:0009536]	acetyl-CoA carboxylase activity [GO:0003989]	FALSE	FALSE	0	0	0	BUTTERFLY
cluster10445_1rr.inclade1.ortho2.tre	ME9	ME4	FALSE	FALSE	4.47925	1.51131	2.96794	-1.45664	30.4305	15.2203	15.2102	0.0100296	0.33373	0.0507838	0.103279	SWT16_ORYSJ	Bidirectional sugar transporter SWEET16 (OsSWEET16)	carbohydrate transport [GO:0008643]	integral component of membrane [GO:0016021]; integral component of plasma membrane [GO:0005887]	sugar transmembrane transporter activity [GO:0051119]	FALSE	FALSE	HUMMINGBIRD	0	HUMMINGBIRD	0
cluster10446_1rr.inclade1.ortho1.tre	ME10	ME3	TRUE	FALSE	66.5302	26.6605	39.8697	-13.2092	78.8132	43.9551	34.8581	9.09702	0.31537	0.0929974	-0.043301	TCP2_ARATH	Transcription factor TCP2 (Protein TEOSINTE BRANCHED 1) (Protein TEOSINTE-LIKE1, CYCLOIDEA, and PROLIFERATING CELL FACTOR 2)	cell differentiation [GO:0030154]; leaf development [GO:0048366]; leaf morphogenesis [GO:0009965]; positive regulation of development, heterochronic [GO:0045962]; positive regulation of nucleic acid-templated transcription [GO:1903508]; positive regulation of photomorphogenesis [GO:2000306]; regulation of transcription, DNA-templated [GO:0006355]; response to ME2 light [GO:0009637]; transcription…	nucleus [GO:0005634]	DNA binding [GO:0003677]; DNA-binding transcription factor activity [GO:0003700]	FALSE	FALSE	0	0	0	BUTTERFLY
cluster10447_1rr.inclade1.ortho1.tre	ME5	ME0	FALSE	FALSE	6.44681	1.56325	4.88356	-3.32031	2.05604	0.15542	1.90062	-1.7452	0.40178	0.0667582	0.0139749	DMP2_ARATH	Protein DMP2 (AtDMP2)	abscission [GO:0009838]; endomembrane system organization [GO:0010256]	endoplasmic reticulum [GO:0005783]; endoplasmic reticulum membrane [GO:0005789]; integral component of membrane [GO:0016021]; plant-type vacuole membrane [GO:0009705]		FALSE	TRUE	HUMMINGBIRD	0	HUMMINGBIRD	0
cluster10448_1rr.inclade1.ortho2.tre	ME9	ME4	FALSE	FALSE	35.0463	18.1712	16.8751	1.29606	85.4494	54.2212	31.2282	22.993	0.32232	0.0449468	-0.0086677	NA	NA	NA	NA	NA	FALSE	FALSE	HUMMINGBIRD	0	HUMMINGBIRD	0
cluster10448_1rr.inclade1.ortho3.tre	ME3	ME2	TRUE	FALSE	41.0059	34.6187	6.3872	28.2315	62.5566	54.2047	8.352	45.8527	0.33886	-0.0759359	0.00355589	NA	NA	NA	NA	NA	FALSE	FALSE	0	0	BEE	BEE
cluster1045_1rr.inclade1.ortho1.tre	ME48	ME2	FALSE	FALSE	9.95274	2.12943	7.82331	-5.69387	17.1697	6.66325	10.5064	-3.84319	0.71873	0.0213186	0.00266263	WNK4_ORYSJ	Probable serine/threonine-protein kinase WNK4 (OsWNK4) (EC 2.7.11.1) (Protein kinase with no lysine 4)	intracellular signal transduction [GO:0035556]; protein phosphorylation [GO:0006468]	cytosol [GO:0005829]	ATP binding [GO:0005524]; protein serine/threonine kinase activity [GO:0004674]	FALSE	FALSE	0	0	0	BEE
cluster10450_1rr.inclade1.ortho1.tre	ME0	ME3	FALSE	FALSE	4.93428	0.453638	4.48064	-4.027	17.3065	8.79799	8.50848	0.289506	0.39679	0.0398878	0.0114235	GBB_ORYSJ	Guanine nucleotide-binding protein subunit beta (WD40 repeat-containing protein 80) (OsWD40-80)	defense response to fungus, incompatible interaction [GO:0009817]; endoplasmic reticulum unfolded protein response [GO:0030968]; fruit development [GO:0010154]; G-protein coupled receptor signaling pathway [GO:0007186]; jasmonic acid mediated signaling pathway [GO:0009867]; lateral root development [GO:0048527]; negative regulation of abscisic acid-activated signaling pathway [GO:0009788]; plant …	Cul4-RING E3 ubiquitin ligase complex [GO:0080008]; endoplasmic reticulum [GO:0005783]; heterotrimeric G-protein complex [GO:0005834]; plasma membrane [GO:0005886]		FALSE	FALSE	0	0	0	BUTTERFLY
cluster10452_1rr.inclade1.ortho2.tre	ME55	ME19	FALSE	FALSE	3.83141	0.519922	3.31148	-2.79156	18.862	5.91668	12.9454	-7.02869	0.50316	-0.0352708	0.00177155	NA	NA	NA	NA	NA	FALSE	FALSE	0	0	0	0
cluster10453_1rr.inclade1.ortho1.tre	ME50	ME10	TRUE	FALSE	11.4072	3.73983	7.66742	-3.92758	22.9024	5.53955	17.3628	-11.8233	0.15027	0.0725035	-0.121358	CAP1_ARATH	Probable clathrin assembly protein At4g32285	clathrin coat assembly [GO:0048268]; clathrin-dependent endocytosis [GO:0072583]	clathrin-coated pit [GO:0005905]; clathrin-coated vesicle [GO:0030136]; cytosol [GO:0005829]; Golgi apparatus [GO:0005794]; nucleus [GO:0005634]; plasma membrane [GO:0005886]	1-phosphatidylinositol binding [GO:0005545]; clathrin binding [GO:0030276]	FALSE	FALSE	0	0	0	0
cluster10454_1rr.inclade1.ortho3.tre	ME0	ME6	FALSE	FALSE	10.7071	2.03729	8.66976	-6.63248	12.3714	2.9384	9.43298	-6.49458	0.07573	-0.117982	-0.130212	NFYC1_ARATH	Nuclear transcription factor Y subunit C-1 (AtNF-YC-1) (Transcriptional activator HAP5A)	positive regulation of photomorphogenesis [GO:2000306]; positive regulation of transcription, DNA-templated [GO:0045893]; regulation of transcription, DNA-templated [GO:0006355]; transcription, DNA-templated [GO:0006351]	CCAAT-binding factor complex [GO:0016602]; nucleus [GO:0005634]	DNA binding [GO:0003677]; DNA-binding transcription factor activity [GO:0003700]; protein heterodimerization activity [GO:0046982]	FALSE	FALSE	0	HUMMINGBIRD	0	HUMMINGBIRD
cluster10455_1rr.inclade1.ortho3.tre	ME12	ME15	FALSE	FALSE	17.0093	10.9665	6.04278	4.92372	6.54792	2.76411	3.78381	-1.0197	0.29474	0.0598351	-0.0758876	Y2165_ARATH	Probable LRR receptor-like serine/threonine-protein kinase At2g16250 (EC 2.7.11.1)		integral component of membrane [GO:0016021]; plant-type cell wall [GO:0009505]; plasma membrane [GO:0005886]; plasmodesma [GO:0009506]	ATP binding [GO:0005524]; protein serine/threonine kinase activity [GO:0004674]	FALSE	FALSE	0	0	0	0
cluster10456_1rr.inclade1.ortho2.tre	ME35	ME1	FALSE	FALSE	29.5145	5.18381	24.3307	-19.1469	47.1488	31.147	16.0018	15.1452	0.25405	-0.048218	0.00257995	FKB65_ARATH	Peptidyl-prolyl cis-trans isomerase FKBP65 (PPIase FKBP65) (EC 5.2.1.8) (70 kDa peptidyl-prolyl isomerase) (FK506-binding protein 65) (AtFKBP65) (Immunophilin FKBP65) (Peptidyl-prolyl isomerase ROF2) (Protein ROTAMASE FKBP 2) (Rotamase)	cellular heat acclimation [GO:0070370]; chaperone-mediated protein folding [GO:0061077]	nucleus [GO:0005634]; vacuole [GO:0005773]	calmodulin binding [GO:0005516]; FK506 binding [GO:0005528]; peptidyl-prolyl cis-trans isomerase activity [GO:0003755]	FALSE	FALSE	0	0	0	0
cluster10457_1rr.inclade1.ortho2.tre	ME12	ME40	FALSE	FALSE	17.5592	5.26351	12.2957	-7.03222	9.21327	0.839253	8.37402	-7.53477	0.2696	0.111459	0.000311652	GT18_ARATH	Xyloglucan galactosyltransferase XLT2 (EC 2.4.1.-) (Glycosyltransferase 18) (AtGT18) (Protein XYLOGLUCAN L-SIDE CHAIN GALACTOSYLTRANSFERASE POSITION 2)	protein glycosylation [GO:0006486]; xyloglucan biosynthetic process [GO:0009969]	Golgi apparatus [GO:0005794]; Golgi membrane [GO:0000139]; integral component of membrane [GO:0016021]	galactosyltransferase activity [GO:0008378]	FALSE	FALSE	0	BUTTERFLY	0	BUTTERFLY
cluster10458_1rr.inclade1.ortho2.tre	ME2	ME4	FALSE	FALSE	30.9273	18.6482	12.279	6.3692	12.3073	3.03449	9.2728	-6.23831	0.27611	-0.0580936	0.0208523	NA	NA	NA	NA	NA	FALSE	FALSE	0	0	0	0
cluster10459_1rr.inclade1.ortho1.tre	ME14	ME10	FALSE	FALSE	11.3134	3.23879	8.07457	-4.83578	6.6899	0.707078	5.98282	-5.27574	0.21033	0.00359168	-0.000903245	NA	NA	NA	NA	NA	FALSE	FALSE	HUMMINGBIRD	0	HUMMINGBIRD	0
cluster10459_3rr.inclade1.ortho1.tre	ME6	ME31	FALSE	FALSE	9.58223	4.22882	5.3534	-1.12458	22.8379	5.64402	17.1938	-11.5498	0.21289	0.00903114	0.0586015	NA	NA	NA	NA	NA	FALSE	FALSE	BEE	0	BEE	0
cluster1046_1rr.inclade1.ortho5.tre	ME32	ME20	FALSE	TRUE	5.08163	1.25925	3.82238	-2.56313	12.0734	3.59742	8.47593	-4.87851	0.41907	0.0431369	0.0622659	CLPF_ARATH	Clp protease adapter protein ClpF, chloroplastic		chloroplast [GO:0009507]; chloroplastic endopeptidase Clp complex [GO:0009840]	DNA binding [GO:0003677]	FALSE	FALSE	0	0	0	0
cluster10460_1rr.inclade1.ortho1.tre	ME26	ME0	FALSE	FALSE	10.346	5.19009	5.15591	0.034185	3.46238	0.426625	3.03575	-2.60913	0.37884	-0.0639058	0.0348537	SWT10_ARATH	Bidirectional sugar transporter SWEET10 (AtSWEET10) (Protein SUGARS WILL EVENTUALLY BE EXPORTED TRANSPORTERS 10)	sucrose transport [GO:0015770]	integral component of membrane [GO:0016021]; integral component of plasma membrane [GO:0005887]	sucrose transmembrane transporter activity [GO:0008515]; sugar transmembrane transporter activity [GO:0051119]	FALSE	TRUE	HUMMINGBIRD	0	HUMMINGBIRD	0
cluster10462_1rr.inclade1.ortho3.tre	ME1	ME15	FALSE	FALSE	8.68884	3.71882	4.97001	-1.25119	55.463	5.54572	49.9172	-44.3715	0.58156	-0.135211	-0.123659	PICBP_ARATH	Calmodulin binding protein PICBP (Pathogen-induced CaM-binding protein)	defense response [GO:0006952]	plasma membrane [GO:0005886]	calmodulin binding [GO:0005516]	FALSE	FALSE	0	0	0	0
cluster10464_1rr.inclade1.ortho1.tre	ME20	ME10	FALSE	FALSE	9.59206	2.14039	7.45167	-5.31127	18.5939	4.25342	14.3405	-10.0871	0.10155	-0.050759	-0.0838249	CP511_ARATH	Sterol 14-demethylase (EC 1.14.13.70) (Cytochrome P450 51A2) (Cytochrome P450 51G1) (AtCYP51) (Obtusifoliol 14-demethylase) (Protein EMBRYO DEFECTIVE 1738)	sterol biosynthetic process [GO:0016126]	endoplasmic reticulum [GO:0005783]; Golgi apparatus [GO:0005794]; integral component of membrane [GO:0016021]; plasma membrane [GO:0005886]	heme binding [GO:0020037]; iron ion binding [GO:0005506]; methyltransferase activity [GO:0008168]; sterol 14-demethylase activity [GO:0008398]	FALSE	FALSE	HUMMINGBIRD	0	HUMMINGBIRD	0
cluster10465_1rr.inclade1.ortho4.tre	ME10	ME3	FALSE	FALSE	62.4874	13.4956	48.9918	-35.4963	66.8489	27.7769	39.072	-11.2951	0.22234	0.0662379	0.0243113	NA	NA	NA	NA	NA	FALSE	FALSE	0	0	0	BUTTERFLY
cluster10466_1rr.inclade1.ortho1.tre	ME4	ME21	FALSE	FALSE	15.7079	5.23212	10.4757	-5.24362	11.7515	0.424374	11.3271	-10.9027	0.01527	0.0307302	-0.0478489	VPS29_ARATH	Vacuolar protein sorting-associated protein 29 (Protein MAIGO 1) (Vesicle protein sorting 29)	protein targeting to vacuole [GO:0006623]; receptor recycling [GO:0001881]; retrograde transport, endosome to Golgi [GO:0042147]; vacuolar transport [GO:0007034]	cytosol [GO:0005829]; Golgi apparatus [GO:0005794]; intracellular membrane-bounded organelle [GO:0043231]; late endosome membrane [GO:0031902]; membrane [GO:0016020]; multivesicular body [GO:0005771]; retromer complex [GO:0030904]	zinc ion binding [GO:0008270]	FALSE	FALSE	0	HUMMINGBIRD	0	HUMMINGBIRD
cluster10467_1rr.inclade1.ortho1.tre	ME1	ME6	FALSE	FALSE	19.6825	7.16817	12.5143	-5.34618	14.6334	5.34784	9.2856	-3.93776	0.25625	-0.052946	0.024052	RMD5_ARATH	Protein RMD5 homolog	proteasome-mediated ubiquitin-dependent protein catabolic process [GO:0043161]; protein ubiquitination [GO:0016567]	cytoplasm [GO:0005737]; GID complex [GO:0034657]; nucleus [GO:0005634]	metal ion binding [GO:0046872]	FALSE	FALSE	0	HUMMINGBIRD	0	HUMMINGBIRD
cluster10469_1rr.inclade1.ortho1.tre	ME4	ME53	FALSE	FALSE	17.0527	6.80334	10.2493	-3.44601	6.96842	0.537626	6.4308	-5.89317	0.25614	0.0602716	-0.0725988	CCD4_ARATH	Probable carotenoid cleavage dioxygenase 4, chloroplastic (AtCCD4) (EC 1.14.99.-) (AtNCED4)		chloroplast [GO:0009507]; plastoglobule [GO:0010287]	metal ion binding [GO:0046872]; oxidoreductase activity, acting on single donors with incorporation of molecular oxygen, incorporation of two atoms of oxygen [GO:0016702]	FALSE	FALSE	0	BUTTERFLY	0	BUTTERFLY
cluster10470_1rr.inclade1.ortho1.tre	ME17	ME45	FALSE	FALSE	16.7017	7.02466	9.67707	-2.65241	32.0865	6.5801	25.5064	-18.9263	0.15452	-0.0577628	-0.0349287	TET2_ARATH	Tetraspanin-2		integral component of membrane [GO:0016021]		FALSE	FALSE	0	0	0	0
cluster10470_2rr.inclade1.ortho1.tre	ME49	ME15	FALSE	FALSE	5.46768	0.511958	4.95572	-4.44376	20.3594	3.27377	17.0857	-13.8119	0.12193	-0.0880102	-0.048507	TRN2_ARATH	Protein TORNADO 2 (Protein EKEKO) (TETRASPANIN-1)	auxin-activated signaling pathway [GO:0009734]; leaf vascular tissue pattern formation [GO:0010305]; megasporogenesis [GO:0009554]; meristem structural organization [GO:0009933]; radial pattern formation [GO:0009956]; regulation of meristem structural organization [GO:0009934]; root morphogenesis [GO:0010015]	integral component of membrane [GO:0016021]; plasma membrane [GO:0005886]; plasmodesma [GO:0009506]		FALSE	FALSE	0	0	0	0
cluster10472_1rr.inclade1.ortho2.tre	ME2	ME7	FALSE	FALSE	22.5465	16.7534	5.79318	10.9602	37.78	7.91427	29.8657	-21.9514	0.13157	-0.0346815	0.0889997	GT18_ARATH	Xyloglucan galactosyltransferase XLT2 (EC 2.4.1.-) (Glycosyltransferase 18) (AtGT18) (Protein XYLOGLUCAN L-SIDE CHAIN GALACTOSYLTRANSFERASE POSITION 2)	protein glycosylation [GO:0006486]; xyloglucan biosynthetic process [GO:0009969]	Golgi apparatus [GO:0005794]; Golgi membrane [GO:0000139]; integral component of membrane [GO:0016021]	galactosyltransferase activity [GO:0008378]	FALSE	FALSE	0	0	0	0
cluster10474_1rr.inclade1.ortho2.tre	ME41	ME7	FALSE	FALSE	16.0745	1.3932	14.6813	-13.2881	26.1818	5.43607	20.7458	-15.3097	0.05396	0.0604026	0.0792997	RZP23_ORYSJ	Serine/arginine-rich splicing factor RSZ23 (RS-containing zinc finger protein 23) (Os-RSZ23) (Os-RSZp23)	mRNA splicing, via spliceosome [GO:0000398]	nucleus [GO:0005634]	nucleic acid binding [GO:0003676]; zinc ion binding [GO:0008270]	FALSE	FALSE	0	0	0	0
cluster10476_1rr.inclade1.ortho2.tre	ME8	ME21	FALSE	FALSE	19.0857	8.77938	10.3064	-1.52697	26.2783	4.81337	21.465	-16.6516	0.2512	-0.00223238	-0.0432734	PP329_ARATH	Pentatricopeptide repeat-containing protein At4g20770	RNA modification [GO:0009451]	intracellular membrane-bounded organelle [GO:0043231]	endonuclease activity [GO:0004519]; RNA binding [GO:0003723]	FALSE	FALSE	0	HUMMINGBIRD	0	HUMMINGBIRD
cluster10477_2rr.inclade1.ortho1.tre	ME0	ME26	FALSE	FALSE	1.87499	0.292062	1.58293	-1.29086	10.3697	1.2641	9.10565	-7.84155	0.26198	0.0110574	0.0178294	ERF92_ARATH	Ethylene-responsive transcription factor 1B (AtERF1B) (Ethylene-responsive element-binding factor 1B) (EREBP-1B)	defense response [GO:0006952]; ethylene-activated signaling pathway [GO:0009873]; jasmonic acid mediated signaling pathway [GO:0009867]; transcription, DNA-templated [GO:0006351]	nucleus [GO:0005634]	DNA binding [GO:0003677]; DNA-binding transcription factor activity [GO:0003700]	TRUE	FALSE	0	0	0	HUMMINGBIRD
cluster10478_1rr.inclade1.ortho1.tre	ME0	ME18	FALSE	FALSE	13.0345	4.32149	8.71301	-4.39152	16.4022	2.25706	14.1452	-11.8881	0.40064	0.11575	0.033003	NA	NA	NA	NA	NA	FALSE	FALSE	0	HUMMINGBIRD	0	HUMMINGBIRD
cluster10479_1rr.inclade1.ortho1.tre	ME1	ME46	FALSE	FALSE	17.8231	5.72473	12.0984	-6.37366	18.5486	3.59147	14.9572	-11.3657	0.15227	-0.156127	-0.174529	ISPG_ARATH	4-hydroxy-3-methylbut-2-en-1-yl diphosphate synthase (ferredoxin), chloroplastic (EC 1.17.7.1) (1-hydroxy-2-methyl-2-(E)-butenyl 4-diphosphate synthase) (Protein CHLOROPLAST BIOGENESIS 4) (Protein CONSTITUTIVE SUBTILISIN 3)	isopentenyl diphosphate biosynthetic process, methylerythritol 4-phosphate pathway [GO:0019288]; response to bacterium [GO:0009617]; systemic acquired resistance, salicylic acid mediated signaling pathway [GO:0009862]; terpenoid biosynthetic process [GO:0016114]	chloroplast [GO:0009507]; chloroplast envelope [GO:0009941]; chloroplast stroma [GO:0009570]	4-hydroxy-3-methylbut-2-en-1-yl diphosphate synthase activity [GO:0046429]; 4 iron, 4 sulfur cluster binding [GO:0051539]; iron ion binding [GO:0005506]	FALSE	FALSE	0	HUMMINGBIRD	0	HUMMINGBIRD
cluster1048_1rr.inclade1.ortho3.tre	ME39	ME49	FALSE	FALSE	11.6694	1.62628	10.0431	-8.41684	11.8354	1.02814	10.8072	-9.77909	0.2846	0.0712231	-0.00333866	PFKA2_ARATH	ATP-dependent 6-phosphofructokinase 2 (ATP-PFK 2) (Phosphofructokinase 2) (EC 2.7.1.11) (Phosphohexokinase 2)	fructose 6-phosphate metabolic process [GO:0006002]; glycolytic process [GO:0006096]	cytosol [GO:0005829]	6-phosphofructokinase activity [GO:0003872]; ATP binding [GO:0005524]; metal ion binding [GO:0046872]	FALSE	FALSE	0	0	BUTTERFLY	0
cluster1048_2rr.inclade1.ortho9.tre	ME15	ME7	FALSE	FALSE	2.06515	0.576753	1.4884	-0.911644	12.6348	3.7653	8.86955	-5.10424	0.46434	0.0378157	0.112725	PFKA4_ARATH	ATP-dependent 6-phosphofructokinase 4, chloroplastic (ATP-PFK 4) (Phosphofructokinase 4) (EC 2.7.1.11) (Phosphohexokinase 4)	fructose 6-phosphate metabolic process [GO:0006002]; glycolytic process [GO:0006096]	chloroplast [GO:0009507]	6-phosphofructokinase activity [GO:0003872]; ATP binding [GO:0005524]; metal ion binding [GO:0046872]	TRUE	FALSE	0	0	0	0
cluster10480_1rr.inclade1.ortho1.tre	ME10	ME3	FALSE	TRUE	66.3805	18.0966	48.2839	-30.1872	63.6654	31.0835	32.5819	-1.49845	0.20876	0.108528	0.067907	BAS1_ORYSJ	2-Cys peroxiredoxin BAS1, chloroplastic (EC 1.11.1.15) (Thiol-specific antioxidant protein)	cell redox homeostasis [GO:0045454]; hydrogen peroxide catabolic process [GO:0042744]	chloroplast [GO:0009507]	peroxidase activity [GO:0004601]; peroxiredoxin activity [GO:0051920]	FALSE	FALSE	0	0	0	BUTTERFLY
cluster10481_1rr.inclade1.ortho2.tre	ME30	ME39	FALSE	FALSE	7.48379	1.5159	5.9679	-4.452	14.1741	0.658353	13.5157	-12.8574	0.25012	0.043211	-0.066058	NA	NA	NA	NA	NA	FALSE	FALSE	0	0	HUMMINGBIRD	0
cluster10482_1rr.inclade1.ortho3.tre	ME0	ME2	FALSE	FALSE	4.05966	0.545804	3.51386	-2.96806	10.5346	6.44235	4.09227	2.35008	0.43829	0.0547792	0.00327129	NA	NA	NA	NA	NA	FALSE	FALSE	0	0	0	BEE
cluster10483_1rr.inclade1.ortho4.tre	ME4	ME28	FALSE	FALSE	17.4917	9.72951	7.76219	1.96732	7.19774	1.35505	5.8427	-4.48765	0.20532	0.070921	0.0574587	GIF1_ARATH	GRF1-interacting factor 1 (AtGIF1) (Protein ANGUSTIFOLIA 3) (Transcription coactivator GIF1)	adaxial/abaxial pattern specification [GO:0009955]; cell proliferation [GO:0008283]; cotyledon development [GO:0048825]; leaf development [GO:0048366]; regulation of transcription, DNA-templated [GO:0006355]; transcription, DNA-templated [GO:0006351]		transcription coactivator activity [GO:0003713]	FALSE	FALSE	0	0	0	0
cluster10484_1rr.inclade1.ortho2.tre	ME11	ME4	FALSE	FALSE	39.4526	9.28614	30.1665	-20.8804	27.7302	13.2002	14.53	-1.32983	0.25334	0.15453	0.0615016	NDK4_ARATH	Nucleoside diphosphate kinase IV, chloroplastic/mitochondrial (NDK IV) (NDP kinase IV) (NDPK IV) (EC 2.7.4.6) (Nucleoside diphosphate kinase 4)	CTP biosynthetic process [GO:0006241]; GTP biosynthetic process [GO:0006183]; UTP biosynthetic process [GO:0006228]	chloroplast thylakoid lumen [GO:0009543]; intracellular [GO:0005622]; mitochondrial intermembrane space [GO:0005758]; mitochondrion [GO:0005739]	ATP binding [GO:0005524]; nucleoside diphosphate kinase activity [GO:0004550]; zinc ion binding [GO:0008270]	FALSE	FALSE	0	0	0	0
cluster10486_1rr.inclade1.ortho1.tre	ME50	ME1	FALSE	FALSE	2.84264	0.179717	2.66293	-2.48321	15.5255	7.30506	8.22046	-0.915408	0.24678	0.0204158	-0.0283539	JGB_ARATH	Protein JINGUBANG	pollen germination [GO:0009846]	cytoplasm [GO:0005737]; nucleus [GO:0005634]		FALSE	FALSE	0	0	0	0
cluster10488_1rr.inclade1.ortho1.tre	ME5	ME22	FALSE	FALSE	2.74569	0.982749	1.76294	-0.78019	9.0407	1.2689	7.77179	-6.50289	0.32055	0.0721139	-0.00803807	TLPH_ARATH	Thaumatin-like protein				TRUE	FALSE	HUMMINGBIRD	HUMMINGBIRD	HUMMINGBIRD	HUMMINGBIRD
cluster10488_2rr.inclade1.ortho2.tre	ME39	ME5	TRUE	FALSE	17.0952	4.09363	13.0015	-8.90789	27.0713	14.0315	13.0398	0.991715	0.38388	0.0518493	0.0263565	TLPH_ARATH	Thaumatin-like protein				FALSE	FALSE	0	BEE	BUTTERFLY	BEE
cluster1049_1rr.inclade1.ortho6.tre	ME3	ME2	FALSE	FALSE	31.6427	23.3037	8.33901	14.9646	33.0564	24.6956	8.3608	16.3348	0.40634	-0.0757626	-0.043558	C3H53_ORYSJ	Zinc finger CCCH domain-containing protein 53 (OsC3H53)			DNA binding [GO:0003677]; metal ion binding [GO:0046872]; RNA binding [GO:0003723]	FALSE	FALSE	0	0	BEE	BEE
cluster10491_1rr.inclade1.ortho3.tre	ME22	ME14	FALSE	FALSE	16.245	7.16251	9.08251	-1.92	42.3622	22.0363	20.3259	1.71034	0.31229	-0.0563432	-0.163807	BI1_ARATH	Bax inhibitor 1 (AtBI-1) (BI-1)	ER overload response [GO:0006983]; negative regulation of apoptotic process [GO:0043066]; negative regulation of programmed cell death [GO:0043069]; response to water deprivation [GO:0009414]; very long-chain fatty acid metabolic process [GO:0000038]	cytoplasm [GO:0005737]; endoplasmic reticulum [GO:0005783]; endoplasmic reticulum membrane [GO:0005789]; integral component of membrane [GO:0016021]; nuclear envelope [GO:0005635]		FALSE	FALSE	HUMMINGBIRD	HUMMINGBIRD	HUMMINGBIRD	HUMMINGBIRD
cluster10493_1rr.inclade1.ortho3.tre	ME51	ME27	FALSE	FALSE	1.81137	0.179964	1.63141	-1.45144	6.34449	1.01361	5.33087	-4.31726	0.33656	-0.0222695	0.0315998	NA	NA	NA	NA	NA	TRUE	FALSE	0	BUTTERFLY	0	BUTTERFLY
cluster10494_1rr.inclade1.ortho1.tre	ME0	ME0	FALSE	FALSE	2.04475	0.410298	1.63445	-1.22415	1.23117	0.115649	1.11552	-0.99987	0.21944	-0.00703925	-0.0341895	AGL42_ARATH	MADS-box protein AGL42 (Protein AGAMOUS-LIKE 42) (Protein FOREVER YOUNG FLOWER)	abscission [GO:0009838]; cell differentiation [GO:0030154]; floral organ senescence [GO:0080187]; leaf senescence [GO:0010150]; positive regulation of transcription by RNA polymerase II [GO:0045944]; regulation of flower development [GO:0009909]; transcription, DNA-templated [GO:0006351]	nucleus [GO:0005634]	DNA-binding transcription factor activity [GO:0003700]; protein dimerization activity [GO:0046983]; RNA polymerase II regulatory region sequence-specific DNA binding [GO:0000977]	TRUE	TRUE	0	0	0	0
cluster10495_1rr.inclade1.ortho1.tre	ME0	ME3	FALSE	FALSE	11.1988	2.75025	8.44856	-5.69831	3.70774	0.810549	2.89719	-2.08664	0.1211	0.100421	-0.0157818	XERIC_ARATH	Probable E3 ubiquitin-protein ligase XERICO (EC 2.3.2.27) (RING-type E3 ubiquitin transferase XERICO)	abscisic acid biosynthetic process [GO:0009688]; abscisic acid metabolic process [GO:0009687]; proteasome-mediated ubiquitin-dependent protein catabolic process [GO:0043161]; response to chitin [GO:0010200]; response to gibberellin [GO:0009739]; response to osmotic stress [GO:0006970]; response to salt stress [GO:0009651]	integral component of membrane [GO:0016021]	metal ion binding [GO:0046872]; ubiquitin protein ligase activity [GO:0061630]	FALSE	TRUE	0	0	0	BUTTERFLY
cluster10495_1rr.inclade1.ortho2.tre	ME15	ME7	FALSE	FALSE	13.8884	4.91613	8.97225	-4.05611	65.4347	28.9872	36.4475	-7.46027	0.27851	0.00978769	0.0688647	XERIC_ARATH	Probable E3 ubiquitin-protein ligase XERICO (EC 2.3.2.27) (RING-type E3 ubiquitin transferase XERICO)	abscisic acid biosynthetic process [GO:0009688]; abscisic acid metabolic process [GO:0009687]; proteasome-mediated ubiquitin-dependent protein catabolic process [GO:0043161]; response to chitin [GO:0010200]; response to gibberellin [GO:0009739]; response to osmotic stress [GO:0006970]; response to salt stress [GO:0009651]	integral component of membrane [GO:0016021]	metal ion binding [GO:0046872]; ubiquitin protein ligase activity [GO:0061630]	FALSE	FALSE	0	0	0	0
cluster10496_1rr.inclade1.ortho1.tre	ME5	ME8	FALSE	FALSE	16.4022	10.9787	5.42353	5.55517	30.6542	15.5909	15.0633	0.527531	0.10195	0.0161163	0.080783	GALE2_CYATE	UDP-glucose 4-epimerase GEPI48 (EC 5.1.3.2) (Galactowaldenase) (UDP-galactose 4-epimerase)	galactose metabolic process [GO:0006012]		UDP-glucose 4-epimerase activity [GO:0003978]	FALSE	FALSE	HUMMINGBIRD	0	HUMMINGBIRD	0
cluster10497_1rr.inclade1.ortho3.tre	ME32	ME46	TRUE	FALSE	18.3688	5.15043	13.2184	-8.06797	7.34017	1.53954	5.80063	-4.26109	0.31514	0.059345	0.0207983	NA	NA	NA	NA	NA	FALSE	FALSE	0	HUMMINGBIRD	0	HUMMINGBIRD
cluster10498_1rr.inclade1.ortho1.tre	ME41	ME7	FALSE	FALSE	12.8427	1.88895	10.9538	-9.06481	19.2501	5.59098	13.6591	-8.06816	0.21259	0.0527044	0.0260753	SAU50_ARATH	Auxin-responsive protein SAUR50 (Protein SMALL AUXIN UP RNA 50)	auxin-activated signaling pathway [GO:0009734]; regulation of growth [GO:0040008]			FALSE	FALSE	0	0	0	0
cluster10498_1rr.inclade2.ortho1.tre	ME0	ME41	FALSE	FALSE	4.89195	1.78997	3.10198	-1.31201	20.2536	1.33523	18.9184	-17.5831	0.66665	0.0552194	0.0143939	SAU50_ARATH	Auxin-responsive protein SAUR50 (Protein SMALL AUXIN UP RNA 50)	auxin-activated signaling pathway [GO:0009734]; regulation of growth [GO:0040008]			FALSE	FALSE	0	0	0	0
cluster1050_1rr.inclade1.ortho16.tre	ME0	ME5	FALSE	FALSE	10.2931	0.892158	9.40092	-8.50876	36.7955	22.3194	14.476	7.84339	0.26793	0.0294146	0.0120836	RGA3_SOLBU	Putative disease resistance protein RGA3 (Blight resistance protein B149) (RGA1-blb)	defense response [GO:0006952]		ADP binding [GO:0043531]; ATP binding [GO:0005524]	FALSE	FALSE	0	BEE	0	BEE
cluster1050_1rr.inclade1.ortho7.tre	ME37	ME5	FALSE	FALSE	11.7713	1.71401	10.0573	-8.34328	24.3991	12.6354	11.7637	0.871631	0.30682	-0.0229243	0.0252199	RGA4_SOLBU	Putative disease resistance protein RGA4 (RGA4-blb)	defense response [GO:0006952]		ADP binding [GO:0043531]; ATP binding [GO:0005524]	FALSE	FALSE	BUTTERFLY	BEE	BUTTERFLY	BEE
cluster10500_1rr.inclade1.ortho1.tre	ME6	ME12	FALSE	FALSE	22.5474	7.86379	14.6836	-6.81978	34.1851	7.61256	26.5726	-18.96	0.07762	0.0688654	-0.0418872	SYNC1_ARATH	Asparagine--tRNA ligase, cytoplasmic 1 (EC 6.1.1.22) (Asparaginyl-tRNA synthetase 1) (AsnRS 1) (Protein EMBRYO DEFECTIVE 2755)	asparaginyl-tRNA aminoacylation [GO:0006421]; embryo development ending in seed dormancy [GO:0009793]; response to cadmium ion [GO:0046686]	chloroplast [GO:0009507]; cytosol [GO:0005829]; mitochondrion [GO:0005739]	asparagine-tRNA ligase activity [GO:0004816]; ATP binding [GO:0005524]; DNA binding [GO:0003677]	FALSE	FALSE	BEE	BUTTERFLY	BEE	BUTTERFLY
cluster10501_1rr.inclade1.ortho1.tre	ME37	ME5	FALSE	FALSE	3.07854	0.642499	2.43604	-1.79354	15.966	6.75279	9.21318	-2.46039	0.24387	-0.062471	0.0851255	NIC4_ARATH	Probable inactive nicotinamidase At3g16190	uracil catabolic process [GO:0006212]	cytoplasm [GO:0005737]	catalytic activity [GO:0003824]	FALSE	FALSE	BUTTERFLY	BEE	BUTTERFLY	BEE
cluster10504_1rr.inclade1.ortho1.tre	ME13	ME8	FALSE	FALSE	6.39942	1.11645	5.28297	-4.16651	6.79441	1.32539	5.46902	-4.14363	0.195	0.092201	0.0312204	CAR4_ARATH	Protein C2-DOMAIN ABA-RELATED 4 (C2 domain-containing protein) (AtC2) (GTPase activating protein 1) (AtGAP1)	abscisic acid-activated signaling pathway [GO:0009738]; defense response [GO:0006952]; positive regulation of abscisic acid-activated signaling pathway [GO:0009789]; positive regulation of defense response to bacterium, incompatible interaction [GO:1902479]; positive regulation of GTPase activity [GO:0043547]; positive regulation of response to salt stress [GO:1901002]; response to salt stress [G…	cytosol [GO:0005829]; nucleus [GO:0005634]; plasma membrane [GO:0005886]	GTPase activator activity [GO:0005096]; metal ion binding [GO:0046872]; phospholipid binding [GO:0005543]	FALSE	FALSE	HUMMINGBIRD	0	HUMMINGBIRD	0
cluster10504_1rr.inclade2.ortho3.tre	ME45	ME24	FALSE	FALSE	3.62354	0.271309	3.35223	-3.08092	8.96551	2.51241	6.4531	-3.94069	0.2677	-0.0408535	0.0312451	CAR4_ARATH	Protein C2-DOMAIN ABA-RELATED 4 (C2 domain-containing protein) (AtC2) (GTPase activating protein 1) (AtGAP1)	abscisic acid-activated signaling pathway [GO:0009738]; defense response [GO:0006952]; positive regulation of abscisic acid-activated signaling pathway [GO:0009789]; positive regulation of defense response to bacterium, incompatible interaction [GO:1902479]; positive regulation of GTPase activity [GO:0043547]; positive regulation of response to salt stress [GO:1901002]; response to salt stress [G…	cytosol [GO:0005829]; nucleus [GO:0005634]; plasma membrane [GO:0005886]	GTPase activator activity [GO:0005096]; metal ion binding [GO:0046872]; phospholipid binding [GO:0005543]	FALSE	FALSE	HUMMINGBIRD	HUMMINGBIRD	HUMMINGBIRD	HUMMINGBIRD
cluster10505_1rr.inclade1.ortho2.tre	ME1	ME0	FALSE	FALSE	18.008	8.6199	9.38812	-0.768217	7.14791	0.648094	6.49981	-5.85172	0.38603	-0.0234132	-0.0299671	PP303_ARATH	Pentatricopeptide repeat-containing protein At4g04370	RNA modification [GO:0009451]	intracellular membrane-bounded organelle [GO:0043231]	endonuclease activity [GO:0004519]; RNA binding [GO:0003723]	FALSE	FALSE	0	0	0	0
cluster10506_1rr.inclade1.ortho1.tre	ME18	ME9	FALSE	FALSE	22.0646	6.5109	15.5537	-9.04284	18.5022	6.68689	11.8153	-5.12837	0.23781	-0.057746	0.0354069	MD10B_ARATH	Mediator of RNA polymerase II transcription subunit 10b	regulation of transcription by RNA polymerase II [GO:0006357]; transcription, DNA-templated [GO:0006351]	core mediator complex [GO:0070847]; mediator complex [GO:0016592]	transcription coregulator activity [GO:0003712]	FALSE	FALSE	BUTTERFLY	0	BUTTERFLY	0
cluster10508_1rr.inclade1.ortho2.tre	ME10	ME3	FALSE	TRUE	4.8124	1.07539	3.73701	-2.66162	12.8875	3.94381	8.9437	-4.99989	0.24418	0.0858518	0.0422393	EULS3_ARATH	Ricin B-like lectin EULS3 (Euonymus lectin S3) (AtEULS3)	defense response to bacterium [GO:0042742]; stomatal closure [GO:0090332]	cytoplasm [GO:0005737]; nucleus [GO:0005634]	carbohydrate binding [GO:0030246]	FALSE	FALSE	0	0	0	BUTTERFLY
cluster1051_1rr.inclade1.ortho10.tre	ME0	ME27	FALSE	FALSE	4.24852	2.16385	2.08466	0.0791886	10.4118	2.50588	7.9059	-5.40001	0.3431	-0.00292201	0.0336504	BGAL3_ARATH	Beta-galactosidase 3 (Lactase 3) (EC 3.2.1.23)	carbohydrate metabolic process [GO:0005975]	apoplast [GO:0048046]; plant-type cell wall [GO:0009505]; vacuole [GO:0005773]	beta-galactosidase activity [GO:0004565]; carbohydrate binding [GO:0030246]	FALSE	FALSE	0	BUTTERFLY	0	BUTTERFLY
cluster10510_1rr.inclade1.ortho4.tre	ME5	ME8	FALSE	FALSE	26.6396	18.357	8.28259	10.0744	31.6845	16.3131	15.3714	0.941671	0.37274	0.101951	-0.042633	HSFA8_ARATH	Heat stress transcription factor A-8 (AtHsfA8) (AtHsf-03) (Heat shock factor protein 5) (HSF 5) (Heat shock transcription factor 5) (HSTF 5)	transcription, DNA-templated [GO:0006351]	cytoplasm [GO:0005737]; nucleus [GO:0005634]	DNA-binding transcription factor activity [GO:0003700]; sequence-specific DNA binding [GO:0043565]	FALSE	FALSE	HUMMINGBIRD	0	HUMMINGBIRD	0
cluster10511_1rr.inclade1.ortho1.tre	ME7	ME0	FALSE	FALSE	7.87566	1.50672	6.36894	-4.86223	2.162	0.219007	1.943	-1.72399	0.39252	0.0279943	0.039436	GAT12_ARATH	GATA transcription factor 12	cell differentiation [GO:0030154]; cell wall organization [GO:0071555]; circadian rhythm [GO:0007623]; multicellular organism development [GO:0007275]; response to light stimulus [GO:0009416]; tracheary element differentiation [GO:1905177]	nucleus [GO:0005634]; transcription factor complex [GO:0005667]	chromatin binding [GO:0003682]; DNA-binding transcription factor activity [GO:0003700]; RNA polymerase II regulatory region sequence-specific DNA binding [GO:0000977]; RNA polymerase II transcription factor binding [GO:0001085]; transcriptional activator activity, RNA polymerase II transcription regulatory region sequence-specific DNA binding [GO:0001228]; zinc ion binding [GO:0008270]	FALSE	TRUE	0	0	0	0
cluster10512_1rr.inclade1.ortho4.tre	ME5	ME3	FALSE	FALSE	28.8474	23.2043	5.64313	17.5612	22.5981	7.809	14.7891	-6.98009	0.20474	0.0614679	0.0399546	NA	NA	NA	NA	NA	FALSE	FALSE	HUMMINGBIRD	0	HUMMINGBIRD	BUTTERFLY
cluster10514_1rr.inclade1.ortho1.tre	ME0	ME24	FALSE	FALSE	3.73718	1.00349	2.73369	-1.73021	3.25445	0.343266	2.91119	-2.56792	0.17046	0.0407403	-0.0638553	PMTI_ARATH	Probable methyltransferase PMT18 (EC 2.1.1.-)	methylation [GO:0032259]	cytoplasm [GO:0005737]; endoplasmic reticulum membrane [GO:0005789]; integral component of membrane [GO:0016021]	S-adenosylmethionine-dependent methyltransferase activity [GO:0008757]	FALSE	TRUE	0	HUMMINGBIRD	0	HUMMINGBIRD
cluster10515_1rr.inclade1.ortho3.tre	ME57	ME40	FALSE	FALSE	6.39256	0.572088	5.82047	-5.24838	11.7994	0.899839	10.8996	-9.99976	0.25537	0.0994159	0.0425246	HEXO2_ARATH	Beta-hexosaminidase 2 (EC 3.2.1.52) (Beta-GlcNAcase 2) (Beta-N-acetylhexosaminidase 2) (Beta-hexosaminidase 3) (AtHEX3) (N-acetyl-beta-glucosaminidase 2)	carbohydrate metabolic process [GO:0005975]	plasma membrane [GO:0005886]	beta-N-acetylhexosaminidase activity [GO:0004563]; hexosaminidase activity [GO:0015929]; N-acetyl-beta-D-galactosaminidase activity [GO:0102148]; UDP-glucosyltransferase activity [GO:0035251]	FALSE	FALSE	0	BUTTERFLY	0	BUTTERFLY
cluster10516_1rr.inclade1.ortho1.tre	ME7	ME46	FALSE	FALSE	24.318	9.16336	15.1547	-5.9913	13.2784	2.26287	11.0155	-8.75266	0.26144	0.0521802	-0.0308	NA	NA	NA	NA	NA	FALSE	FALSE	0	HUMMINGBIRD	0	HUMMINGBIRD
cluster10517_1rr.inclade1.ortho1.tre	ME1	ME1	FALSE	FALSE	52.872	29.9177	22.9542	6.96351	101.93	69.5365	32.3934	37.1431	0.15404	-0.0684199	-0.100889	GATA1_ARATH	GATA transcription factor 1 (AtGATA-1)	cell differentiation [GO:0030154]; circadian rhythm [GO:0007623]	nucleus [GO:0005634]; transcription factor complex [GO:0005667]	chromatin binding [GO:0003682]; DNA-binding transcription factor activity [GO:0003700]; RNA polymerase II regulatory region sequence-specific DNA binding [GO:0000977]; RNA polymerase II transcription factor binding [GO:0001085]; transcriptional activator activity, RNA polymerase II transcription regulatory region sequence-specific DNA binding [GO:0001228]; transcription regulatory region DNA bind…	FALSE	FALSE	0	0	0	0
cluster10519_1rr.inclade1.ortho4.tre	ME22	ME14	FALSE	FALSE	3.74383	0.751583	2.99225	-2.24067	12.6782	2.80958	9.86864	-7.05906	0.33526	-0.0924642	-0.0372205	PP160_ARATH	Pentatricopeptide repeat-containing protein At2g17525, mitochondrial	RNA modification [GO:0009451]	intracellular membrane-bounded organelle [GO:0043231]; mitochondrion [GO:0005739]	endonuclease activity [GO:0004519]; RNA binding [GO:0003723]	FALSE	FALSE	HUMMINGBIRD	HUMMINGBIRD	HUMMINGBIRD	HUMMINGBIRD
cluster10520_1rr.inclade1.ortho1.tre	ME11	ME3	FALSE	FALSE	14.692	3.84363	10.8484	-7.00474	19.6075	7.32434	12.2831	-4.95878	0.16991	0.0469726	0.0126059	FB119_ARATH	F-box protein At2g27310				FALSE	FALSE	0	0	0	BUTTERFLY
cluster10521_1rr.inclade1.ortho1.tre	ME18	ME1	FALSE	FALSE	28.252	5.41571	22.8363	-17.4206	29.5452	16.8411	12.7041	4.13701	0.2785	-0.0983772	-0.0998069	PP364_ARATH	Pentatricopeptide repeat-containing protein At5g04780, mitochondrial	RNA modification [GO:0009451]	chloroplast [GO:0009507]; intracellular membrane-bounded organelle [GO:0043231]; mitochondrion [GO:0005739]	endonuclease activity [GO:0004519]; RNA binding [GO:0003723]; zinc ion binding [GO:0008270]	FALSE	FALSE	BUTTERFLY	0	BUTTERFLY	0
cluster10522_1rr.inclade1.ortho3.tre	ME16	ME17	FALSE	FALSE	15.6963	8.7343	6.96201	1.77228	13.5775	5.70234	7.87517	-2.17283	0.62202	0.0294638	0.0346422	NA	NA	NA	NA	NA	FALSE	FALSE	BUTTERFLY	BUTTERFLY	BUTTERFLY	BUTTERFLY
cluster10523_1rr.inclade1.ortho3.tre	ME50	ME9	FALSE	FALSE	3.18271	0.186062	2.99664	-2.81058	10.7818	2.14692	8.63485	-6.48793	0.42998	0.0202953	-0.0290459	NA	NA	NA	NA	NA	FALSE	FALSE	0	0	0	0
cluster10526_1rr.inclade1.ortho1.tre	ME0	ME40	FALSE	FALSE	1.94038	0.696214	1.24416	-0.54795	4.49488	0.369932	4.12495	-3.75501	0.54847	-0.0211358	0.0346575	NLTL5_ARATH	Non-specific lipid-transfer protein-like protein At5g64080	lipid transport [GO:0006869]	anchored component of membrane [GO:0031225]; anchored component of plasma membrane [GO:0046658]	lipid binding [GO:0008289]	TRUE	TRUE	0	BUTTERFLY	0	BUTTERFLY
cluster10526_2rr.inclade1.ortho3.tre	ME17	ME15	FALSE	FALSE	24.7795	13.806	10.9734	2.83257	24.9972	4.20513	20.792	-16.5869	0.43207	-0.0499967	-0.0844208	NLTL5_ARATH	Non-specific lipid-transfer protein-like protein At5g64080	lipid transport [GO:0006869]	anchored component of membrane [GO:0031225]; anchored component of plasma membrane [GO:0046658]	lipid binding [GO:0008289]	FALSE	FALSE	0	0	0	0
cluster10527_1rr.inclade1.ortho1.tre	ME0	ME8	FALSE	FALSE	1.80651	0.614691	1.19182	-0.577128	27.8863	9.82904	18.0572	-8.2282	0.42944	0.0239387	0.115794	CDSP_ARATH	Thioredoxin-like protein CDSP32, chloroplastic (Chloroplastic drought-induced stress protein of 32 KDa) (AtCDSP32)	cell redox homeostasis [GO:0045454]; cellular response to oxidative stress [GO:0034599]; glycerol ether metabolic process [GO:0006662]; response to oxidative stress [GO:0006979]; response to water deprivation [GO:0009414]	chloroplast [GO:0009507]; chloroplast envelope [GO:0009941]; chloroplast stroma [GO:0009570]	oxidoreductase activity, acting on a sulfur group of donors, disulfide as acceptor [GO:0016671]; protein disulfide oxidoreductase activity [GO:0015035]; protein-disulfide reductase activity [GO:0047134]; thioredoxin-disulfide reductase activity [GO:0004791]	TRUE	FALSE	0	0	0	0
cluster10527_2rr.inclade1.ortho1.tre	ME1	ME1	FALSE	FALSE	32.6595	18.0414	14.6181	3.42324	45.6762	20.5975	25.0787	-4.48113	0.16678	-0.0646293	-0.0347574	CDSP_ARATH	Thioredoxin-like protein CDSP32, chloroplastic (Chloroplastic drought-induced stress protein of 32 KDa) (AtCDSP32)	cell redox homeostasis [GO:0045454]; cellular response to oxidative stress [GO:0034599]; glycerol ether metabolic process [GO:0006662]; response to oxidative stress [GO:0006979]; response to water deprivation [GO:0009414]	chloroplast [GO:0009507]; chloroplast envelope [GO:0009941]; chloroplast stroma [GO:0009570]	oxidoreductase activity, acting on a sulfur group of donors, disulfide as acceptor [GO:0016671]; protein disulfide oxidoreductase activity [GO:0015035]; protein-disulfide reductase activity [GO:0047134]; thioredoxin-disulfide reductase activity [GO:0004791]	FALSE	FALSE	0	0	0	0
cluster10528_1rr.inclade1.ortho2.tre	ME60	ME14	FALSE	FALSE	8.01811	2.31665	5.70146	-3.38481	19.2786	6.10828	13.1703	-7.06206	0.22191	-0.105313	-0.0954543	IDD10_ARATH	Zinc finger protein JACKDAW (ID1-like zinc finger protein 3) (Protein indeterminate-domain 10)	asymmetric cell division [GO:0008356]; regulation of cell division [GO:0051302]; regulation of epidermal cell differentiation [GO:0045604]; regulation of meristem growth [GO:0010075]; regulation of transcription, DNA-templated [GO:0006355]; root development [GO:0048364]; transcription, DNA-templated [GO:0006351]	nucleus [GO:0005634]	DNA binding [GO:0003677]; DNA-binding transcription factor activity [GO:0003700]; metal ion binding [GO:0046872]	FALSE	FALSE	0	HUMMINGBIRD	0	HUMMINGBIRD
cluster1053_1rr.inclade1.ortho5.tre	ME7	ME8	FALSE	FALSE	8.20755	2.41046	5.7971	-3.38664	5.792	0.767818	5.02418	-4.25636	0.21378	0.0469485	0.0283794	PHL9_ARATH	Myb-related protein 2 (Myb family transcription factor PHL9) (Protein NITROGEN STARVATION RESPONSE 1) (AtNSR1) (Protein PHR1-LIKE 9)	transcription, DNA-templated [GO:0006351]	nucleus [GO:0005634]	DNA binding [GO:0003677]; DNA-binding transcription factor activity [GO:0003700]	FALSE	FALSE	0	0	0	0
cluster10530_1rr.inclade1.ortho5.tre	ME1	ME26	FALSE	FALSE	13.1505	1.87599	11.2745	-9.39849	36.1858	5.83245	30.3533	-24.5209	0.40055	0.100533	-0.0821986	RBP1C_ARATH	Ran-binding protein 1 homolog c	G1/S transition of mitotic cell cycle [GO:0000082]; mRNA transport [GO:0051028]; positive regulation of GTPase activity [GO:0043547]; protein import into nucleus, translocation [GO:0000060]; RNA export from nucleus [GO:0006405]; spindle organization [GO:0007051]; ubiquitin-dependent protein catabolic process [GO:0006511]	cytoplasm [GO:0005737]; nuclear pore [GO:0005643]; nucleus [GO:0005634]	Ran GTPase binding [GO:0008536]	FALSE	FALSE	0	0	0	HUMMINGBIRD
cluster10531_1rr.inclade1.ortho2.tre	ME58	ME16	FALSE	FALSE	29.7072	2.95764	26.7496	-23.792	65.8606	15.1308	50.7298	-35.599	0.2097	-0.0410598	-0.0371554	NA	NA	NA	NA	NA	FALSE	FALSE	0	0	0	0
cluster10532_1rr.inclade1.ortho1.tre	ME14	ME6	FALSE	FALSE	20.5276	9.25668	11.2709	-2.01419	49.3126	20.7889	28.5237	-7.73484	0.16465	-0.000436351	0.0270709	CNR6_MAIZE	Cell number regulator 6 (ZmCNR06)		integral component of membrane [GO:0016021]		FALSE	FALSE	HUMMINGBIRD	HUMMINGBIRD	HUMMINGBIRD	HUMMINGBIRD
cluster10534_1rr.inclade1.ortho4.tre	ME8	ME4	FALSE	FALSE	11.9586	1.54739	10.4112	-8.8638	28.3628	10.679	17.6838	-7.00479	0.39236	0.119148	0.123321	SUA_ARATH	SUPPRESSOR OF ABI3-5 (REQUIRED FOR SNC4-1D protein 1) (Splicing factor SUA)	mRNA processing [GO:0006397]; mRNA splicing, via spliceosome [GO:0000398]; regulation of RNA splicing [GO:0043484]	nucleus [GO:0005634]; spliceosomal complex [GO:0005681]	metal ion binding [GO:0046872]; RNA binding [GO:0003723]	FALSE	FALSE	0	0	0	0
cluster10535_1rr.inclade1.ortho1.tre	ME3	ME2	FALSE	FALSE	21.3306	12.0801	9.25048	2.82965	45.8857	31.7631	14.1227	17.6404	0.26367	-0.026828	-0.0200158	WRK21_ARATH	Probable WRKY transcription factor 21 (WRKY DNA-binding protein 21)	glucosinolate metabolic process [GO:0019760]; transcription, DNA-templated [GO:0006351]	nucleus [GO:0005634]	calmodulin binding [GO:0005516]; DNA-binding transcription factor activity [GO:0003700]; sequence-specific DNA binding [GO:0043565]	FALSE	FALSE	0	0	BEE	BEE
cluster10535_1rr.inclade1.ortho2.tre	ME35	ME26	FALSE	FALSE	8.72948	1.30913	7.42035	-6.11122	24.7327	5.22066	19.512	-14.2914	0.2802	-0.0043962	-0.0568305	WRK21_ARATH	Probable WRKY transcription factor 21 (WRKY DNA-binding protein 21)	glucosinolate metabolic process [GO:0019760]; transcription, DNA-templated [GO:0006351]	nucleus [GO:0005634]	calmodulin binding [GO:0005516]; DNA-binding transcription factor activity [GO:0003700]; sequence-specific DNA binding [GO:0043565]	FALSE	FALSE	0	0	0	HUMMINGBIRD
cluster10536_1rr.inclade1.ortho1.tre	ME64	ME22	FALSE	FALSE	4.59035	0.991714	3.59864	-2.60692	9.33851	1.40361	7.9349	-6.53129	0.13117	-0.0284165	0.0785241	NA	NA	NA	NA	NA	FALSE	FALSE	0	HUMMINGBIRD	0	HUMMINGBIRD
cluster10537_1rr.inclade1.ortho2.tre	ME19	ME32	FALSE	FALSE	12.1622	1.41718	10.7451	-9.32787	20.6887	2.59087	18.0978	-15.5069	0.48592	0.138448	0.0303939	NDUB9_ARATH	NADH dehydrogenase [ubiquinone] 1 beta subcomplex subunit 9 (B22 subunit of eukaryotic mitochondrial complex I) (Complex I-B22) (AtCIB22) (CI-B22) (NADH-ubiquinone oxidoreductase B22 subunit)	carbohydrate metabolic process [GO:0005975]; mitochondrial electron transport, NADH to ubiquinone [GO:0006120]; photorespiration [GO:0009853]	mitochondrial membrane [GO:0031966]; mitochondrial respiratory chain complex I [GO:0005747]; mitochondrion [GO:0005739]; respiratory chain complex I [GO:0045271]; vacuolar membrane [GO:0005774]		FALSE	FALSE	0	BUTTERFLY	0	BUTTERFLY
cluster10538_1rr.inclade1.ortho2.tre	ME1	ME2	FALSE	FALSE	18.2254	6.41209	11.8133	-5.4012	28.2189	8.38607	19.8328	-11.4467	0.28414	-0.0469067	-0.0139041	C89A9_ARATH	Cytochrome P450 89A9 (EC 1.14.-.-)	secondary metabolite biosynthetic process [GO:0044550]	endoplasmic reticulum membrane [GO:0005789]; integral component of membrane [GO:0016021]; membrane [GO:0016020]	heme binding [GO:0020037]; iron ion binding [GO:0005506]; oxidoreductase activity, acting on paired donors, with incorporation or reduction of molecular oxygen, NAD(P)H as one donor, and incorporation of one atom of oxygen [GO:0016709]	FALSE	FALSE	0	0	0	BEE
cluster10539_1rr.inclade1.ortho2.tre	ME2	ME0	FALSE	FALSE	24.5929	20.4211	4.17174	16.2494	2.66683	0.180268	2.48656	-2.30629	0.1644	-0.0658405	0.00967191	P2C29_ARATH	Protein phosphatase 2C 29 (AtPP2C29) (EC 3.1.3.16) (Protein POLTERGEIST-LIKE 1) (Protein phosphatase 2C PLL1) (PP2C PLL1)	maintenance of meristem identity [GO:0010074]; meristem structural organization [GO:0009933]; multicellular organism development [GO:0007275]; regulation of transcription, DNA-templated [GO:0006355]; unidimensional cell growth [GO:0009826]	nucleus [GO:0005634]; plasma membrane [GO:0005886]	metal ion binding [GO:0046872]; phospholipid binding [GO:0005543]; protein serine/threonine phosphatase activity [GO:0004722]	FALSE	TRUE	0	0	0	0
cluster10539_1rr.inclade1.ortho3.tre	ME12	ME0	FALSE	FALSE	3.14597	1.31392	1.83205	-0.518129	5.10159	0.535347	4.56624	-4.03089	0.24598	0.0713129	-0.115797	P2C29_ARATH	Protein phosphatase 2C 29 (AtPP2C29) (EC 3.1.3.16) (Protein POLTERGEIST-LIKE 1) (Protein phosphatase 2C PLL1) (PP2C PLL1)	maintenance of meristem identity [GO:0010074]; meristem structural organization [GO:0009933]; multicellular organism development [GO:0007275]; regulation of transcription, DNA-templated [GO:0006355]; unidimensional cell growth [GO:0009826]	nucleus [GO:0005634]; plasma membrane [GO:0005886]	metal ion binding [GO:0046872]; phospholipid binding [GO:0005543]; protein serine/threonine phosphatase activity [GO:0004722]	FALSE	FALSE	0	0	0	0
cluster10541_1rr.inclade1.ortho1.tre	ME5	ME4	FALSE	FALSE	9.74685	2.76035	6.9865	-4.22615	10.7602	3.22667	7.53353	-4.30686	0.33268	0.0336595	-0.00228301	PNSL4_ARATH	Photosynthetic NDH subunit of lumenal location 4, chloroplastic (FK506-binding protein 16-2) (AtFKBP16-2) (Immunophilin FKBP16-2) (Peptidyl-prolyl cis-trans isomerase FKBP16-2) (PPIase FKBP16-2) (EC 5.2.1.8) (Rotamase)	chaperone-mediated protein folding [GO:0061077]	chloroplast [GO:0009507]; chloroplast thylakoid lumen [GO:0009543]; chloroplast thylakoid membrane [GO:0009535]; thylakoid [GO:0009579]	FK506 binding [GO:0005528]; peptidyl-prolyl cis-trans isomerase activity [GO:0003755]	FALSE	FALSE	HUMMINGBIRD	0	HUMMINGBIRD	0
cluster10543_1rr.inclade1.ortho1.tre	ME31	ME1	FALSE	FALSE	32.4191	6.77547	25.6436	-18.8681	21.8359	12.8697	8.96613	3.90359	0.07513	-0.0381691	0.0233112	SC15A_ARATH	Exocyst complex component SEC15A (AtSec15a) (Probable exocyst complex component 6)	acceptance of pollen [GO:0060321]; pollen germination [GO:0009846]; pollen tube growth [GO:0009860]; vesicle docking involved in exocytosis [GO:0006904]	cytosol [GO:0005829]; exocyst [GO:0000145]		FALSE	FALSE	0	0	0	0
cluster10545_1rr.inclade1.ortho3.tre	ME41	ME20	FALSE	FALSE	15.7859	3.74834	12.0376	-8.28926	37.0711	5.88721	31.1839	-25.2967	0.11384	0.0864545	-0.0194704	PIN1A_ORYSJ	Auxin efflux carrier component 1a (OsPIN1a) (Auxin efflux carrier component 1) (OsPIN1) (Ethylene-insensitive root 1 homolog) (OsPIN1b)	adventitious root development [GO:0048830]; auxin-activated signaling pathway [GO:0009734]; auxin homeostasis [GO:0010252]; auxin polar transport [GO:0009926]	auxin efflux carrier complex [GO:0009921]; endoplasmic reticulum [GO:0005783]; integral component of membrane [GO:0016021]; membrane [GO:0016020]	auxin efflux transmembrane transporter activity [GO:0010329]; transporter activity [GO:0005215]	FALSE	FALSE	0	0	0	0
cluster10547_1rr.inclade2.ortho1.tre	ME0	ME4	FALSE	FALSE	8.72961	0.523635	8.20598	-7.68234	26.7206	5.62854	21.0921	-15.4636	0.21031	0.106871	0.00698126	RFS5_ARATH	Probable galactinol--sucrose galactosyltransferase 5 (EC 2.4.1.82) (Protein SEED IMBIBITION 1-LIKE) (Raffinose synthase 5)	carbohydrate metabolic process [GO:0005975]; response to abscisic acid [GO:0009737]; response to oxidative stress [GO:0006979]; response to water deprivation [GO:0009414]	chloroplast [GO:0009507]	galactinol-sucrose galactosyltransferase activity [GO:0047274]	FALSE	FALSE	0	0	0	0
cluster10548_1rr.inclade1.ortho2.tre	ME0	ME46	FALSE	FALSE	1.91296	0.244831	1.66813	-1.4233	5.05956	0.815126	4.24443	-3.4293	0.53115	-0.0144891	0.00634064	NA	NA	NA	NA	NA	TRUE	FALSE	0	HUMMINGBIRD	0	HUMMINGBIRD
cluster10549_1rr.inclade1.ortho1.tre	ME21	ME1	FALSE	FALSE	20.386	1.59603	18.79	-17.1939	51.1298	25.3029	25.8268	-0.523933	0.32081	-0.0865042	-0.029985	NA	NA	NA	NA	NA	FALSE	FALSE	BEE	0	BEE	0
cluster1055_1rr.inclade1.ortho7.tre	ME0	ME23	FALSE	TRUE	17.0828	2.21199	14.8708	-12.6588	15.4343	1.84946	13.5849	-11.7354	0.1892	0.146423	0.0453631	NA	NA	NA	NA	NA	FALSE	FALSE	0	BUTTERFLY	0	BUTTERFLY
cluster10550_1rr.inclade1.ortho4.tre	ME5	ME14	FALSE	FALSE	14.3702	6.14067	8.22954	-2.08887	11.4005	4.60108	6.79945	-2.19837	0.10036	0.146996	0.0244282	WNK1_ARATH	Serine/threonine-protein kinase WNK1 (AtWNK1) (EC 2.7.11.1) (Protein kinase with no lysine 1)	circadian rhythm [GO:0007623]; intracellular signal transduction [GO:0035556]; protein phosphorylation [GO:0006468]	cytosol [GO:0005829]; membrane [GO:0016020]	ATP binding [GO:0005524]; protein kinase activity [GO:0004672]; protein serine/threonine kinase activity [GO:0004674]	FALSE	FALSE	HUMMINGBIRD	HUMMINGBIRD	HUMMINGBIRD	HUMMINGBIRD
cluster10551_1rr.inclade1.ortho3.tre	ME31	ME1	FALSE	FALSE	13.9606	2.53296	11.4277	-8.89472	59.9868	37.4233	22.5635	14.8598	0.27855	-0.0253563	-0.0899256	NA	NA	NA	NA	NA	FALSE	FALSE	0	0	0	0
cluster10553_1rr.inclade1.ortho1.tre	ME12	ME20	FALSE	FALSE	21.979	7.51166	14.4673	-6.95564	13.6488	2.42203	11.2268	-8.80477	0.28053	0.0685946	0.0331403	PPR77_ARATH	Pentatricopeptide repeat-containing protein At1g52620	RNA modification [GO:0009451]	intracellular membrane-bounded organelle [GO:0043231]	endonuclease activity [GO:0004519]; RNA binding [GO:0003723]	FALSE	FALSE	0	0	0	0
cluster10554_1rr.inclade1.ortho2.tre	ME62	ME1	FALSE	FALSE	17.5096	1.91105	15.5985	-13.6875	26.5036	11.1043	15.3993	-4.29493	0.39443	0.108856	-0.0464826	NA	NA	NA	NA	NA	FALSE	FALSE	0	0	0	0
cluster10556_1rr.inclade1.ortho4.tre	ME4	ME13	FALSE	FALSE	14.2687	7.7761	6.49263	1.28348	24.0606	11.4767	12.5839	-1.10723	0.10827	0.0922207	0.0803729	NCBP2_ARATH	Nuclear cap-binding protein subunit 2 (20 kDa nuclear cap-binding protein) (NCBP 20 kDa subunit) (AtCBP20)	mRNA cis splicing, via spliceosome [GO:0045292]; mRNA splicing, via spliceosome [GO:0000398]; primary miRNA processing [GO:0031053]; RNA metabolic process [GO:0016070]; RNA splicing, via endonucleolytic cleavage and ligation [GO:0000394]	cytoplasm [GO:0005737]; mRNA cap binding complex [GO:0005845]; nuclear cap binding complex [GO:0005846]; nucleus [GO:0005634]	RNA cap binding [GO:0000339]	FALSE	FALSE	0	BUTTERFLY	0	BUTTERFLY
cluster10557_1rr.inclade1.ortho3.tre	ME13	ME21	FALSE	FALSE	11.9296	5.56625	6.36337	-0.797116	14.9969	0.738398	14.2585	-13.5201	0.30379	0.0805466	0.0594695	NA	NA	NA	NA	NA	FALSE	FALSE	HUMMINGBIRD	HUMMINGBIRD	HUMMINGBIRD	HUMMINGBIRD
cluster10559_1rr.inclade1.ortho3.tre	ME1	ME2	FALSE	FALSE	34.7617	22.7944	11.9673	10.8271	25.9348	8.47042	17.4644	-8.99399	0.37798	-0.0262648	-0.0240938	NAKR2_ARATH	Protein SODIUM POTASSIUM ROOT DEFECTIVE 2 (NaKR2) (Heavy metal-associated plant protein 3) (AtHPP03)	cellular transition metal ion homeostasis [GO:0046916]; metal ion transport [GO:0030001]	cytoplasm [GO:0005737]	transition metal ion binding [GO:0046914]	FALSE	FALSE	0	0	0	BEE
cluster1056_1rr.inclade1.ortho2.tre	ME52	ME57	FALSE	FALSE	2.16744	0.248535	1.9189	-1.67036	4.46396	0.659005	3.80496	-3.14595	0.21767	-0.0486352	-0.0245039	MNS5_ARATH	Alpha-mannosidase I MNS5 (EC 3.2.1.-)	N-glycan processing [GO:0006491]; protein glycosylation [GO:0006486]; ubiquitin-dependent ERAD pathway [GO:0030433]	endoplasmic reticulum [GO:0005783]; endoplasmic reticulum membrane [GO:0005789]; Golgi membrane [GO:0000139]; integral component of membrane [GO:0016021]	alpha-mannosidase activity [GO:0004559]; calcium ion binding [GO:0005509]; mannosyl-oligosaccharide 1,2-alpha-mannosidase activity [GO:0004571]	TRUE	TRUE	0	0	0	0
cluster1056_1rr.inclade1.ortho5.tre	ME6	ME31	FALSE	FALSE	6.80495	2.89646	3.90849	-1.01202	9.20278	1.51267	7.69012	-6.17745	0.26472	-0.00558113	0.0504263	MNS5_ARATH	Alpha-mannosidase I MNS5 (EC 3.2.1.-)	N-glycan processing [GO:0006491]; protein glycosylation [GO:0006486]; ubiquitin-dependent ERAD pathway [GO:0030433]	endoplasmic reticulum [GO:0005783]; endoplasmic reticulum membrane [GO:0005789]; Golgi membrane [GO:0000139]; integral component of membrane [GO:0016021]	alpha-mannosidase activity [GO:0004559]; calcium ion binding [GO:0005509]; mannosyl-oligosaccharide 1,2-alpha-mannosidase activity [GO:0004571]	FALSE	FALSE	BEE	0	BEE	0
cluster10560_1rr.inclade1.ortho3.tre	ME25	ME23	FALSE	FALSE	10.6305	3.5486	7.08189	-3.53329	48.7034	9.00725	39.6962	-30.6889	0.30841	-0.0272257	0.0522725	MIS12_ARATH	Protein MIS12 homolog (Protein MINICHROMOSOME INSTABILITY 12) (AtMIS12) (Protein MIS12-LIKE)	cell division [GO:0051301]; kinetochore assembly [GO:0051382]; meiotic cell cycle [GO:0051321]; mitotic sister chromatid segregation [GO:0000070]; protein localization to kinetochore [GO:0034501]	chromosome, centromeric region [GO:0000775]; nuclear MIS12/MIND complex [GO:0000818]; nucleus [GO:0005634]		FALSE	FALSE	BUTTERFLY	BUTTERFLY	BUTTERFLY	BUTTERFLY
cluster10562_1rr.inclade1.ortho6.tre	ME12	ME19	FALSE	FALSE	6.83383	1.53058	5.30325	-3.77268	10.7531	2.35364	8.39949	-6.04585	0.22584	-0.00481073	-0.0265294	PP350_ARATH	Pentatricopeptide repeat-containing protein At4g35130, chloroplastic	RNA modification [GO:0009451]	chloroplast [GO:0009507]; intracellular membrane-bounded organelle [GO:0043231]	endonuclease activity [GO:0004519]; RNA binding [GO:0003723]; zinc ion binding [GO:0008270]	FALSE	FALSE	0	0	0	0
cluster10563_1rr.inclade1.ortho3.tre	ME24	ME11	FALSE	FALSE	8.15954	0.933518	7.22603	-6.29251	24.7348	1.43548	23.2993	-21.8638	0.57195	0.0183204	-0.0159993	ANM13_ARATH	Probable histone-arginine methyltransferase 1.3 (AtPRMT13) (EC 2.1.1.319) (Coactivator-associated methyltransferase 1A) (Protein arginine N-methyltransferase 4B) (AtPRMT4B)	histone H3-R17 methylation [GO:0034971]; histone H3-R26 methylation [GO:0034972]; histone H3-R2 methylation [GO:0034970]; peptidyl-arginine methylation, to asymmetrical-dimethyl arginine [GO:0019919]; positive regulation of response to oxidative stress [GO:1902884]; positive regulation of transcription, DNA-templated [GO:0045893]; regulation of flower development [GO:0009909]; response to cadmium…	cytoplasm [GO:0005737]; cytosol [GO:0005829]; nucleus [GO:0005634]	[myelin basic protein]-arginine N-methyltransferase activity [GO:0016277]; histone-arginine N-methyltransferase activity [GO:0008469]; protein-arginine omega-N asymmetric methyltransferase activity [GO:0035242]; protein-arginine omega-N monomethyltransferase activity [GO:0035241]; protein heterodimerization activity [GO:0046982]; protein homodimerization activity [GO:0042803]	FALSE	FALSE	0	HUMMINGBIRD	0	HUMMINGBIRD
cluster10564_1rr.inclade1.ortho6.tre	ME16	ME4	FALSE	FALSE	3.39529	0.620683	2.7746	-2.15392	9.14896	2.39532	6.75364	-4.35832	0.46741	0.0661326	0.0963301	NA	NA	NA	NA	NA	FALSE	FALSE	BUTTERFLY	0	BUTTERFLY	0
cluster10565_1rr.inclade1.ortho1.tre	ME63	ME46	FALSE	FALSE	10.2102	2.92338	7.28681	-4.36343	17.4693	4.55996	12.9093	-8.34938	0.09951	-0.0734026	0.00533915	PEX4_ARATH	Protein PEROXIN-4 (AtPEX4) (E2 ubiquitin-conjugating enzyme 21) (Probable ubiquitin-conjugating enzyme E2 21) (EC 2.3.2.23) (Ubiquitin carrier protein 21)	fatty acid beta-oxidation [GO:0006635]; peroxisome organization [GO:0007031]; protein import into peroxisome matrix [GO:0016558]; protein ubiquitination [GO:0016567]	cytoplasm [GO:0005737]; peroxisomal membrane [GO:0005778]	ATP binding [GO:0005524]; ubiquitin protein ligase activity [GO:0061630]; ubiquitin protein ligase binding [GO:0031625]; ubiquitin-protein transferase activity [GO:0004842]	FALSE	FALSE	0	HUMMINGBIRD	0	HUMMINGBIRD
cluster10566_1rr.inclade1.ortho3.tre	ME31	ME1	FALSE	FALSE	32.7205	7.53256	25.188	-17.6554	34.5964	24.4566	10.1398	14.3168	0.29103	-0.0439099	-0.00943636	Y1887_ARATH	Putative receptor-like protein kinase At1g80870 (EC 2.7.11.1)	cell surface receptor signaling pathway [GO:0007166]; protein phosphorylation [GO:0006468]	integral component of membrane [GO:0016021]; plasma membrane [GO:0005886]	ATP binding [GO:0005524]; transmembrane receptor protein serine/threonine kinase activity [GO:0004675]	FALSE	FALSE	0	0	0	0
cluster10566_1rr.inclade2.ortho1.tre	ME43	ME42	FALSE	FALSE	11.7887	2.24532	9.54342	-7.29811	26.2793	6.49062	19.7886	-13.298	0.40482	-0.00903539	-0.0687142	Y1887_ARATH	Putative receptor-like protein kinase At1g80870 (EC 2.7.11.1)	cell surface receptor signaling pathway [GO:0007166]; protein phosphorylation [GO:0006468]	integral component of membrane [GO:0016021]; plasma membrane [GO:0005886]	ATP binding [GO:0005524]; transmembrane receptor protein serine/threonine kinase activity [GO:0004675]	FALSE	FALSE	0	0	0	0
cluster10568_1rr.inclade1.ortho1.tre	ME15	ME7	FALSE	FALSE	38.4932	8.60973	29.8834	-21.2737	21.3356	6.00612	15.3295	-9.32339	0.26813	0.15478	0.094391	DREB3_ARATH	Dehydration-responsive element-binding protein 3 (Protein TINY 2)	ethylene-activated signaling pathway [GO:0009873]; positive regulation of transcription, DNA-templated [GO:0045893]; transcription, DNA-templated [GO:0006351]	nucleus [GO:0005634]	DNA-binding transcription factor activity [GO:0003700]; sequence-specific DNA binding [GO:0043565]	FALSE	FALSE	0	0	0	0
cluster10568_1rr.inclade2.ortho1.tre	ME0	ME31	FALSE	FALSE	4.42818	1.18382	3.24436	-2.06054	11.2678	3.34311	7.92472	-4.58161	0.38367	-0.0185353	0.0116783	DREB3_ARATH	Dehydration-responsive element-binding protein 3 (Protein TINY 2)	ethylene-activated signaling pathway [GO:0009873]; positive regulation of transcription, DNA-templated [GO:0045893]; transcription, DNA-templated [GO:0006351]	nucleus [GO:0005634]	DNA-binding transcription factor activity [GO:0003700]; sequence-specific DNA binding [GO:0043565]	FALSE	FALSE	0	0	0	0
cluster10570_1rr.inclade1.ortho4.tre	ME1	ME1	FALSE	FALSE	39.9054	29.2845	10.621	18.6635	72.3853	41.361	31.0243	10.3367	0.17471	-0.0222334	-0.0122932	ALKB2_ARATH	DNA oxidative demethylase ALKBH2 (EC 1.14.11.33) (Alkylated DNA repair protein alkB homolog 2) (Alpha-ketoglutarate-dependent dioxygenase alkB homolog 2)	DNA repair [GO:0006281]	nucleus [GO:0005634]	1-ethyladenine demethylase activity [GO:0103053]; DNA demethylase activity [GO:0035514]; metal ion binding [GO:0046872]	FALSE	FALSE	0	0	0	0
cluster10571_1rr.inclade1.ortho4.tre	ME0	ME61	FALSE	FALSE	3.68512	1.00721	2.67791	-1.6707	14.8433	2.26447	12.5788	-10.3143	0.24044	0.0417479	0.0654435	B561C_ARATH	Cytochrome b561 and DOMON domain-containing protein At3g25290 (Protein b561A.tha3)	oxidation-reduction process [GO:0055114]	integral component of membrane [GO:0016021]; plasma membrane [GO:0005886]; plasmodesma [GO:0009506]	metal ion binding [GO:0046872]	FALSE	FALSE	0	0	0	BUTTERFLY
cluster10573_1rr.inclade1.ortho1.tre	ME24	ME44	FALSE	FALSE	16.2219	3.77387	12.448	-8.67412	27.6684	2.81208	24.8564	-22.0443	0.0115	-0.0266138	-0.0116242	NA	NA	NA	NA	NA	FALSE	FALSE	0	0	0	0
cluster10574_1rr.inclade1.ortho3.tre	ME0	ME41	FALSE	FALSE	2.46656	1.42112	1.04544	0.375676	5.5361	0.50048	5.03562	-4.53514	0.29036	0.00533989	-0.0121716	PNSB4_ARATH	Photosynthetic NDH subunit of subcomplex B 4, chloroplastic (Protein PnsB4) (NDH DEPENDENT FLOW 6) (NDH-DEPENDENT CYCLIC ELECTRON FLOW 6)	photosynthetic electron transport in photosystem I [GO:0009773]	chloroplast [GO:0009507]; chloroplast thylakoid membrane [GO:0009535]; integral component of membrane [GO:0016021]; NAD(P)H dehydrogenase complex (plastoquinone) [GO:0010598]		TRUE	FALSE	0	0	0	0
cluster10575_1rr.inclade1.ortho2.tre	ME10	ME3	TRUE	FALSE	46.9311	22.286	24.6451	-2.35906	84.9565	45.7295	39.227	6.50253	0.19479	0.103319	-0.0357187	GLPK_ARATH	Glycerol kinase (Glycerokinase) (EC 2.7.1.30) (ATP:glycerol 3-phosphotransferase) (Protein GLYCEROL INSENSITIVE 1) (Protein NONHOST RESISTANCE TO P. S. PHASEOLICOLA 1)	defense response to bacterium [GO:0042742]; glycerol-3-phosphate biosynthetic process [GO:0046167]; glycerol catabolic process [GO:0019563]; response to bacterium [GO:0009617]; response to karrikin [GO:0080167]; response to microbial phytotoxin [GO:0010188]; response to molecule of bacterial origin [GO:0002237]; triglyceride metabolic process [GO:0006641]	cytosol [GO:0005829]; mitochondrion [GO:0005739]	ATP binding [GO:0005524]; glycerol kinase activity [GO:0004370]	FALSE	FALSE	0	0	0	BUTTERFLY
cluster10578_1rr.inclade1.ortho2.tre	ME22	ME0	FALSE	FALSE	5.45778	0.800922	4.65686	-3.85594	2.59128	0.218959	2.37232	-2.15336	0.28116	-0.000668416	0.00122796	BET12_ARATH	Bet1-like SNARE 1-2 (AtBET12) (Bet1/Sft1-like SNARE 14b) (AtBS14b)	ER to Golgi vesicle-mediated transport [GO:0006888]; protein transport [GO:0015031]	endoplasmic reticulum membrane [GO:0005789]; Golgi membrane [GO:0000139]; integral component of membrane [GO:0016021]	SNAP receptor activity [GO:0005484]	FALSE	TRUE	HUMMINGBIRD	0	HUMMINGBIRD	0
cluster10580_1rr.inclade1.ortho2.tre	ME41	ME19	FALSE	FALSE	9.88457	1.58481	8.29976	-6.71495	22.4574	2.61476	19.8427	-17.2279	0.64307	0.0520825	0.027716	E1312_ARATH	Glucan endo-1,3-beta-glucosidase 12 (EC 3.2.1.39) ((1->3)-beta-glucan endohydrolase 12) ((1->3)-beta-glucanase 12) (Beta-1,3-endoglucanase 12) (Beta-1,3-glucanase 12)	carbohydrate metabolic process [GO:0005975]; cell wall organization [GO:0071555]; defense response [GO:0006952]	anchored component of membrane [GO:0031225]; anchored component of plasma membrane [GO:0046658]; cell wall [GO:0005618]; extracellular region [GO:0005576]	glucan endo-1,3-beta-D-glucosidase activity [GO:0042973]; hydrolase activity, hydrolyzing O-glycosyl compounds [GO:0004553]; polysaccharide binding [GO:0030247]	FALSE	FALSE	0	0	0	0
cluster10582_1rr.inclade1.ortho1.tre	ME0	ME12	FALSE	FALSE	14.5779	2.65687	11.921	-9.26415	23.6374	7.47225	16.1651	-8.69286	0.24176	0.0571626	0.0737851	TOC90_ARATH	Translocase of chloroplast 90, chloroplastic (AtToc90) (EC 3.6.5.-) (90 kDa chloroplast outer envelope protein) (Plastid protein import 4)	protein targeting to chloroplast [GO:0045036]	chloroplast outer membrane [GO:0009707]; integral component of membrane [GO:0016021]	GTP binding [GO:0005525]; hydrolase activity [GO:0016787]; metal ion binding [GO:0046872]	FALSE	FALSE	0	BUTTERFLY	0	BUTTERFLY
cluster10583_1rr.inclade1.ortho1.tre	ME1	ME1	FALSE	FALSE	46.0347	25.5526	20.4821	5.07055	79.4763	49.2175	30.2588	18.9587	0.26921	-0.0350652	-0.0473167	FPA_ARATH	Flowering time control protein FPA	cell differentiation [GO:0030154]; chromatin silencing by small RNA [GO:0031048]; embryo sac development [GO:0009553]; flower development [GO:0009908]; mRNA polyadenylation [GO:0006378]; mRNA splicing, via spliceosome [GO:0000398]; positive regulation of flower development [GO:0009911]; transcription, DNA-templated [GO:0006351]; vegetative to reproductive phase transition of meristem [GO:0010228]	chromatin [GO:0000785]; nucleus [GO:0005634]	nucleic acid binding [GO:0003676]; RNA binding [GO:0003723]	FALSE	FALSE	0	0	0	0
cluster10584_1rr.inclade1.ortho2.tre	ME14	ME50	FALSE	FALSE	14.5287	4.00724	10.5215	-6.51425	35.7235	3.77535	31.9482	-28.1728	0.28921	0.00823701	0.0630647	OTU_ARATH	OTU domain-containing protein At3g57810		chloroplast [GO:0009507]		FALSE	FALSE	HUMMINGBIRD	HUMMINGBIRD	HUMMINGBIRD	HUMMINGBIRD
cluster10585_1rr.inclade1.ortho1.tre	ME45	ME9	FALSE	FALSE	5.51764	0.819655	4.69799	-3.87833	17.0311	3.00285	14.0283	-11.0254	0.30244	-0.0784434	-0.0341515	ASHH1_ARATH	Histone-lysine N-methyltransferase ASHH1 (EC 2.1.1.43) (ASH1 homolog 1) (Protein SET DOMAIN GROUP 26)	DNA repair [GO:0006281]; flower development [GO:0009908]; histone methylation [GO:0016571]; response to UV-B [GO:0010224]; vegetative to reproductive phase transition of meristem [GO:0010228]	chromosome, centromeric region [GO:0000775]; nucleus [GO:0005634]	histone-lysine N-methyltransferase activity [GO:0018024]	FALSE	FALSE	HUMMINGBIRD	0	HUMMINGBIRD	0
cluster10586_1rr.inclade1.ortho4.tre	ME10	ME7	FALSE	FALSE	20.2141	4.71737	15.4967	-10.7793	42.5854	14.2601	28.3253	-14.0652	0.52117	0.0604949	0.0450109	NA	NA	NA	NA	NA	FALSE	FALSE	0	0	0	0
cluster10587_1rr.inclade1.ortho1.tre	ME36	ME14	FALSE	FALSE	10.8628	2.79954	8.06322	-5.26367	18.7165	4.91109	13.8054	-8.8943	0.30664	-0.0374461	0.0394494	PPDEX_ARATH	DeSI-like protein At4g17486 (EC 3.4.-.-)			peptidase activity [GO:0008233]	FALSE	FALSE	HUMMINGBIRD	HUMMINGBIRD	HUMMINGBIRD	HUMMINGBIRD
cluster10589_1rr.inclade1.ortho2.tre	ME0	ME55	FALSE	FALSE	1.12356	0.272004	0.851554	-0.57955	17.9505	3.96269	13.9878	-10.0251	0.19364	-0.0871213	0.0532547	PIRL_SOLLC	Pirin-like protein		nucleus [GO:0005634]		TRUE	FALSE	0	HUMMINGBIRD	0	HUMMINGBIRD
cluster1059_2rr.inclade1.ortho5.tre	ME0	ME59	FALSE	FALSE	8.78119	2.342	6.43919	-4.09719	4.65582	0.382407	4.27341	-3.89101	0.42371	0.123351	0.082941	MDIS2_ARATH	Protein MALE DISCOVERER 2 (AtMDIS2) (Probable LRR receptor-like serine/threonine-protein kinase MRH1) (EC 2.7.11.1) (Protein MORPHOGENESIS OF ROOT HAIR 1)	cell surface receptor signaling pathway [GO:0007166]; protein phosphorylation [GO:0006468]; root hair cell differentiation [GO:0048765]	endomembrane system [GO:0012505]; integral component of membrane [GO:0016021]; plasma membrane [GO:0005886]; pollen tube [GO:0090406]	ATP binding [GO:0005524]; transmembrane receptor protein serine/threonine kinase activity [GO:0004675]	FALSE	FALSE	0	0	0	0
cluster10590_1rr.inclade1.ortho3.tre	ME34	ME19	FALSE	FALSE	4.33222	0.128326	4.2039	-4.07557	18.068	4.285	13.783	-9.498	0.47061	0.0386148	-0.0101754	ARID2_ARATH	AT-rich interactive domain-containing protein 2 (ARID domain-containing protein 2) (ARID and ELM2 domain-containing protein 2)	regulation of transcription, DNA-templated [GO:0006355]; transcription, DNA-templated [GO:0006351]	nucleus [GO:0005634]; vacuole [GO:0005773]	DNA binding [GO:0003677]	FALSE	FALSE	HUMMINGBIRD	0	HUMMINGBIRD	0
cluster10592_1rr.inclade1.ortho2.tre	ME1	ME27	FALSE	FALSE	7.16612	2.0725	5.09362	-3.02113	12.1209	1.29104	10.8298	-9.53877	0.38795	0.0570725	0.0388054	NA	NA	NA	NA	NA	FALSE	FALSE	0	BUTTERFLY	0	BUTTERFLY
cluster10594_1rr.inclade1.ortho1.tre	ME6	ME5	FALSE	FALSE	25.5548	12.2732	13.2816	-1.00835	37.3663	11.4395	25.9268	-14.4873	0.17505	0.0200608	0.0225221	AB1I_ARATH	ABC transporter I family member 1 (ABC transporter ABCI.1) (AtABCI1) (Cytochrome c biogenesis ATP-binding export protein ccmA-like) (MRP-related protein 3) (Putative non-intrinsic ABC protein 10) (EC 3.6.3.41)	cytochrome complex assembly [GO:0017004]	membrane [GO:0016020]	ATP binding [GO:0005524]; heme-transporting ATPase activity [GO:0015439]; protoheme IX ABC transporter activity [GO:0103115]; transporter activity [GO:0005215]	FALSE	FALSE	BEE	BEE	BEE	BEE
cluster10596_1rr.inclade1.ortho3.tre	ME8	ME6	FALSE	TRUE	21.5403	4.77674	16.7636	-11.9868	24.7304	9.32737	15.403	-6.07566	0.3472	-0.236411	-0.0109567	MED30_ARATH	Mediator of RNA polymerase II transcription subunit 30	regulation of transcription, DNA-templated [GO:0006355]; transcription, DNA-templated [GO:0006351]	mediator complex [GO:0016592]		FALSE	FALSE	0	HUMMINGBIRD	0	HUMMINGBIRD
cluster10597_1rr.inclade1.ortho2.tre	ME36	ME1	FALSE	FALSE	7.13105	2.56275	4.5683	-2.00555	15.3292	5.43585	9.89336	-4.45751	0.0411	-0.0521161	0.035626	ATG8C_ORYSJ	Autophagy-related protein 8C (Autophagy-related ubiquitin-like modifier ATG8C)	autophagy [GO:0006914]; cellular response to nitrogen starvation [GO:0006995]; protein transport [GO:0015031]	autophagosome membrane [GO:0000421]; cytoplasmic vesicle [GO:0031410]; microtubule [GO:0005874]		FALSE	FALSE	HUMMINGBIRD	0	HUMMINGBIRD	0
cluster10598_1rr.inclade1.ortho1.tre	ME52	ME2	FALSE	FALSE	8.89294	1.64363	7.24931	-5.60568	7.04983	2.38626	4.66358	-2.27732	0.27692	0.0222976	0.0498844	PSRP2_ARATH	30S ribosomal protein 2, chloroplastic (Chloroplastic small ribosomal subunit protein cS22) (Plastid-specific 30S ribosomal protein 2, chloroplastic) (PSRP-2)	negative regulation of response to salt stress [GO:1901001]; negative regulation of response to water deprivation [GO:0080148]; regulation of seed germination [GO:0010029]; regulation of seedling development [GO:1900140]; response to cold [GO:0009409]; response to salt stress [GO:0009651]; response to water deprivation [GO:0009414]	chloroplast [GO:0009507]; chloroplast envelope [GO:0009941]; chloroplast stroma [GO:0009570]; chloroplast thylakoid membrane [GO:0009535]; ribosome [GO:0005840]; thylakoid [GO:0009579]	RNA binding [GO:0003723]; rRNA binding [GO:0019843]; single-stranded DNA binding [GO:0003697]	FALSE	FALSE	0	0	0	BEE
cluster10599_1rr.inclade1.ortho2.tre	ME0	ME11	FALSE	FALSE	2.4268	0.541114	1.88569	-1.34458	5.26782	1.08869	4.17913	-3.09044	0.32145	0.040957	-0.0371855	PRRP2_ARATH	Proteinaceous RNase P 2 (EC 3.1.26.5)	mRNA processing [GO:0006397]; snoRNA processing [GO:0043144]; tRNA 5'-leader removal [GO:0001682]	nucleus [GO:0005634]	metal ion binding [GO:0046872]; ribonuclease P activity [GO:0004526]	TRUE	FALSE	0	HUMMINGBIRD	0	HUMMINGBIRD
cluster106_1rr.inclade3.ortho1.tre	ME22	ME14	FALSE	FALSE	3.82634	0.77526	3.05108	-2.27582	16.7569	5.14032	11.6166	-6.47628	0.26799	-0.0329376	-0.00739027	TPS1_ARATH	Alpha,alpha-trehalose-phosphate synthase [UDP-forming] 1 (EC 2.4.1.15) (Trehalose-6-phosphate synthase 1) (AtTPS1)	cell division [GO:0051301]; embryo development ending in seed dormancy [GO:0009793]; plant-type cell wall biogenesis [GO:0009832]; sugar mediated signaling pathway [GO:0010182]; trehalose biosynthetic process [GO:0005992]; trehalose metabolic process [GO:0005991]; trehalose metabolism in response to stress [GO:0070413]	cell wall [GO:0005618]; extracellular region [GO:0005576]; vacuole [GO:0005773]	alpha,alpha-trehalose-phosphate synthase (UDP-forming) activity [GO:0003825]; phosphatase activity [GO:0016791]	FALSE	FALSE	HUMMINGBIRD	HUMMINGBIRD	HUMMINGBIRD	HUMMINGBIRD
cluster1060_1rr.inclade1.ortho1.tre	ME4	ME52	FALSE	FALSE	6.95859	1.81993	5.13866	-3.31873	12.7641	0.701032	12.0631	-11.3621	0.38106	0.0547004	0.0127825	AP1M2_ARATH	AP-1 complex subunit mu-2 (Adaptor protein complex AP-1 subunit mu-2) (Adaptor protein-1 mu-adaptin 2) (Adaptor-related protein complex 1 subunit mu-2) (At-muB2-Ad) (Clathrin assembly protein complex 1 mu-2 medium chain) (Mu1-adaptin 2) (Protein HAPLESS 13)	intracellular protein transport [GO:0006886]; vesicle-mediated transport [GO:0016192]	clathrin adaptor complex [GO:0030131]; clathrin-coated vesicle membrane [GO:0030665]; cytosol [GO:0005829]; early endosome membrane [GO:0031901]; Golgi apparatus [GO:0005794]		FALSE	FALSE	0	0	0	0
cluster1060_1rr.inclade2.ortho3.tre	ME5	ME24	FALSE	TRUE	5.13656	1.8281	3.30847	-1.48037	10.6463	2.27741	8.3689	-6.09149	0.15816	0.0350209	0.0015822	AP1M2_ARATH	AP-1 complex subunit mu-2 (Adaptor protein complex AP-1 subunit mu-2) (Adaptor protein-1 mu-adaptin 2) (Adaptor-related protein complex 1 subunit mu-2) (At-muB2-Ad) (Clathrin assembly protein complex 1 mu-2 medium chain) (Mu1-adaptin 2) (Protein HAPLESS 13)	intracellular protein transport [GO:0006886]; vesicle-mediated transport [GO:0016192]	clathrin adaptor complex [GO:0030131]; clathrin-coated vesicle membrane [GO:0030665]; cytosol [GO:0005829]; early endosome membrane [GO:0031901]; Golgi apparatus [GO:0005794]		FALSE	FALSE	HUMMINGBIRD	HUMMINGBIRD	HUMMINGBIRD	HUMMINGBIRD
cluster10600_1rr.inclade1.ortho1.tre	ME57	ME0	FALSE	FALSE	8.47234	1.54034	6.932	-5.39166	4.97992	0.217218	4.7627	-4.54548	0.39013	0.0315973	0.0138525	NA	NA	NA	NA	NA	FALSE	FALSE	0	0	0	0
cluster10602_1rr.inclade1.ortho4.tre	ME0	ME19	FALSE	FALSE	3.30873	1.13083	2.1779	-1.04708	10.7556	2.57307	8.18258	-5.60951	0.53513	0.00114413	-0.0649064	SSBP_ARATH	Single-stranded DNA-binding protein, mitochondrial		mitochondrion [GO:0005739]	single-stranded DNA binding [GO:0003697]	FALSE	FALSE	0	0	0	0
cluster10603_1rr.inclade1.ortho2.tre	ME1	ME1	FALSE	TRUE	67.1354	43.6039	23.5315	20.0723	128.905	89.0758	39.8289	49.2469	0.30865	-0.115684	-0.0308896	SP1L1_ARATH	Protein SPIRAL1-like 1		microtubule [GO:0005874]		FALSE	FALSE	0	0	0	0
cluster10604_1rr.inclade1.ortho2.tre	ME1	ME1	FALSE	FALSE	10.1087	4.09384	6.01484	-1.921	50.1576	29.2867	20.8709	8.41577	0.17203	-0.0421611	-0.110243	PUR4_ARATH	Probable phosphoribosylformylglycinamidine synthase, chloroplastic/mitochondrial (FGAM synthase) (FGAMS) (EC 6.3.5.3) (Formylglycinamide ribonucleotide amidotransferase) (FGAR amidotransferase) (FGAR-AT) (Formylglycinamide ribotide amidotransferase)	'de novo' IMP biosynthetic process [GO:0006189]; glutamine metabolic process [GO:0006541]; microgametogenesis [GO:0055046]; pollen development [GO:0009555]	chloroplast [GO:0009507]; chloroplast stroma [GO:0009570]; mitochondrion [GO:0005739]	ATP binding [GO:0005524]; metal ion binding [GO:0046872]; phosphoribosylformylglycinamidine synthase activity [GO:0004642]	FALSE	FALSE	0	0	0	0
cluster10606_1rr.inclade1.ortho1.tre	ME5	ME22	FALSE	FALSE	14.6285	9.60465	5.02386	4.58079	11.7184	2.05264	9.66572	-7.61307	0.06994	0.0422434	0.019157	AFB2_ARATH	Protein AUXIN SIGNALING F-BOX 2	auxin-activated signaling pathway [GO:0009734]; defense response [GO:0006952]; pollen maturation [GO:0010152]; protein ubiquitination [GO:0016567]; stamen development [GO:0048443]	nucleus [GO:0005634]; SCF ubiquitin ligase complex [GO:0019005]; vacuolar membrane [GO:0005774]	auxin binding [GO:0010011]; inositol hexakisphosphate binding [GO:0000822]	FALSE	FALSE	HUMMINGBIRD	HUMMINGBIRD	HUMMINGBIRD	HUMMINGBIRD
cluster10607_1rr.inclade1.ortho4.tre	ME12	ME40	FALSE	TRUE	32.8144	12.4353	20.3791	-7.94375	20.8934	1.929	18.9644	-17.0354	0.43828	0.0998357	0.0182309	RT11_ARATH	Probable ribosomal protein S11, mitochondrial (MRP-S11) (S11mt) (Protein NUCLEAR FUSION DEFECTIVE 3, mitochondrial)	karyogamy [GO:0000741]; maturation of SSU-rRNA from tricistronic rRNA transcript (SSU-rRNA, 5.8S rRNA, LSU-rRNA) [GO:0000462]; polar nucleus fusion [GO:0010197]; ribosomal small subunit assembly [GO:0000028]; translation [GO:0006412]	mitochondrial small ribosomal subunit [GO:0005763]	mRNA 5'-UTR binding [GO:0048027]; small ribosomal subunit rRNA binding [GO:0070181]; structural constituent of ribosome [GO:0003735]	FALSE	FALSE	0	BUTTERFLY	0	BUTTERFLY
cluster10612_1rr.inclade1.ortho4.tre	ME26	ME11	FALSE	FALSE	10.8733	4.41009	6.46323	-2.05315	14.2833	4.27203	10.0113	-5.73926	0.52433	-0.0532283	0.0109987	NA	NA	NA	NA	NA	FALSE	FALSE	HUMMINGBIRD	HUMMINGBIRD	HUMMINGBIRD	HUMMINGBIRD
cluster10613_1rr.inclade1.ortho2.tre	ME18	ME17	FALSE	FALSE	6.35748	2.62335	3.73413	-1.11078	15.2261	4.69014	10.536	-5.84587	0.27722	-0.0931087	-0.00600616	BH153_ARATH	Transcription factor bHLH153 (BHLH transcription factor alpha) (bHLH alpha) (Basic helix-loop-helix protein 153) (AtbHLH153) (bHLH 153) (bHLH transcription factor bHLH153)	transcription, DNA-templated [GO:0006351]	nucleus [GO:0005634]	DNA binding [GO:0003677]; DNA-binding transcription factor activity [GO:0003700]; protein dimerization activity [GO:0046983]	FALSE	FALSE	BUTTERFLY	BUTTERFLY	BUTTERFLY	BUTTERFLY
cluster10614_1rr.inclade1.ortho1.tre	ME47	ME36	TRUE	FALSE	20.8061	4.98829	15.8178	-10.8295	42.2757	9.41037	32.8653	-23.455	0.55342	-0.0667944	0.0147011	NA	NA	NA	NA	NA	FALSE	FALSE	0	0	0	0
cluster10615_1rr.inclade1.ortho2.tre	ME31	ME1	FALSE	FALSE	21.2386	4.58651	16.6521	-12.0656	11.5425	6.98865	4.55382	2.43484	0.36062	-0.0299468	0.00101981	NA	NA	NA	NA	NA	FALSE	FALSE	0	0	0	0
cluster10617_1rr.inclade1.ortho4.tre	ME12	ME3	TRUE	TRUE	29.176	20.559	8.61704	11.9419	29.3671	12.1734	17.1936	-5.0202	0.41162	0.0249972	-0.0284712	NA	NA	NA	NA	NA	FALSE	FALSE	0	0	0	BUTTERFLY
cluster10618_1rr.inclade1.ortho3.tre	ME23	ME32	FALSE	FALSE	16.5015	5.69965	10.8018	-5.10217	32.3845	9.73749	22.647	-12.9095	0.29244	-0.0149178	0.0833273	NA	NA	NA	NA	NA	FALSE	FALSE	BUTTERFLY	BUTTERFLY	BUTTERFLY	BUTTERFLY
cluster10619_1rr.inclade1.ortho2.tre	ME4	ME13	FALSE	FALSE	7.14649	2.98832	4.15818	-1.16986	24.4845	7.68939	16.7952	-9.10576	0.3378	0.0336886	-0.0258857	NA	NA	NA	NA	NA	FALSE	FALSE	0	BUTTERFLY	0	BUTTERFLY
cluster1062_1rr.inclade1.ortho9.tre	ME0	ME16	FALSE	FALSE	5.85291	2.19879	3.65412	-1.45534	10.968	3.03458	7.93346	-4.89888	0.5231	-0.0163671	0.0692411	NA	NA	NA	NA	NA	FALSE	FALSE	0	0	0	0
cluster10620_1rr.inclade1.ortho2.tre	ME15	ME3	TRUE	FALSE	29.5998	16.3898	13.2099	3.1799	99.9422	58.6191	41.3231	17.296	0.50212	0.0393185	0.136666	NA	NA	NA	NA	NA	FALSE	FALSE	0	0	0	BUTTERFLY
cluster10621_1rr.inclade1.ortho1.tre	ME10	ME3	FALSE	FALSE	36.5374	8.66698	27.8704	-19.2035	11.7944	2.74986	9.04456	-6.2947	0.19034	0.0774259	0.0367495	KPPR_WHEAT	Phosphoribulokinase, chloroplastic (PRK) (PRKase) (EC 2.7.1.19) (Phosphopentokinase)	reductive pentose-phosphate cycle [GO:0019253]	chloroplast [GO:0009507]	ATP binding [GO:0005524]; phosphoribulokinase activity [GO:0008974]	FALSE	FALSE	0	0	0	BUTTERFLY
cluster10623_1rr.inclade1.ortho1.tre	ME4	ME13	FALSE	TRUE	27.6991	15.3951	12.304	3.09104	18.9285	9.04441	9.88404	-0.839631	0.05648	0.0671932	0.069231	CALS3_ARATH	Callose synthase 3 (EC 2.4.1.34) (1,3-beta-glucan synthase) (Protein GLUCAN SYNTHASE-LIKE 12)	(1->3)-beta-D-glucan biosynthetic process [GO:0006075]; cell wall organization [GO:0071555]; regulation of cell shape [GO:0008360]	1,3-beta-D-glucan synthase complex [GO:0000148]; integral component of membrane [GO:0016021]; plasma membrane [GO:0005886]	1,3-beta-D-glucan synthase activity [GO:0003843]	FALSE	FALSE	0	BUTTERFLY	0	BUTTERFLY
cluster10624_1rr.inclade1.ortho2.tre	ME2	ME1	FALSE	FALSE	29.9742	22.1473	7.82698	14.3203	51.9251	27.6343	24.2909	3.3434	0.30336	-0.0968788	0.027865	NA	NA	NA	NA	NA	FALSE	FALSE	0	0	0	0
cluster10625_1rr.inclade1.ortho1.tre	ME7	ME5	FALSE	FALSE	15.4124	4.30005	11.1124	-6.81234	55.6741	39.817	15.8571	23.9599	0.43957	0.0361236	0.0156513	CXE8_ARATH	Probable carboxylesterase 8 (AtCXE8) (EC 3.1.1.1)	catabolic process [GO:0009056]		carboxylic ester hydrolase activity [GO:0052689]; hydrolase activity [GO:0016787]	FALSE	FALSE	0	BEE	0	BEE
cluster10626_1rr.inclade1.ortho2.tre	ME64	ME30	FALSE	TRUE	4.87577	0.889919	3.98585	-3.09594	11.232	2.72945	8.50255	-5.7731	0.44413	-0.015924	0.0152049	NA	NA	NA	NA	NA	FALSE	FALSE	0	0	0	0
cluster10628_1rr.inclade1.ortho3.tre	ME22	ME14	TRUE	FALSE	21.8854	10.4612	11.4242	-0.963094	34.1123	16.5289	17.5834	-1.05454	0.58867	-0.0120222	0.00929853	CX6B1_ARATH	Cytochrome c oxidase subunit 6b-1 (AtCOX6b-1)	response to salt stress [GO:0009651]	chloroplast [GO:0009507]; chloroplast thylakoid membrane [GO:0009535]; mitochondrion [GO:0005739]; thylakoid [GO:0009579]	copper ion binding [GO:0005507]	FALSE	FALSE	HUMMINGBIRD	HUMMINGBIRD	HUMMINGBIRD	HUMMINGBIRD
cluster10629_1rr.inclade1.ortho1.tre	ME13	ME43	FALSE	FALSE	23.2517	9.12323	14.1284	-5.0052	13.3435	1.37668	11.9669	-10.5902	0.26599	0.0585099	0.0216812	NA	NA	NA	NA	NA	FALSE	FALSE	HUMMINGBIRD	0	HUMMINGBIRD	0
cluster10632_1rr.inclade1.ortho1.tre	ME18	ME9	FALSE	FALSE	8.75653	2.46522	6.29131	-3.82608	21.3945	9.93116	11.4633	-1.53216	0.32578	-0.070058	-0.0418825	NA	NA	NA	NA	NA	FALSE	FALSE	BUTTERFLY	0	BUTTERFLY	0
cluster10633_1rr.inclade1.ortho1.tre	ME18	ME1	FALSE	FALSE	6.11445	1.74588	4.36857	-2.6227	37.0325	21.6844	15.348	6.33644	0.32412	-0.00713804	-0.0272838	NA	NA	NA	NA	NA	FALSE	FALSE	BUTTERFLY	0	BUTTERFLY	0
cluster10634_1rr.inclade1.ortho1.tre	ME24	ME1	TRUE	FALSE	59.7664	15.4087	44.3577	-28.949	122.714	88.7559	33.958	54.7979	0.12531	-0.0764545	-0.0311283	SC13B_ARATH	Protein transport protein SEC13 homolog B (SEC13-like protein B)	COPII-coated vesicle budding [GO:0090114]; mRNA transport [GO:0051028]; positive regulation of TORC1 signaling [GO:1904263]; protein transport [GO:0015031]	COPII vesicle coat [GO:0030127]; endoplasmic reticulum [GO:0005783]; Golgi membrane [GO:0000139]; nuclear envelope [GO:0005635]; nuclear pore [GO:0005643]; nucleolus [GO:0005730]	structural molecule activity [GO:0005198]	FALSE	FALSE	0	0	0	0
cluster10635_1rr.inclade1.ortho6.tre	ME0	ME24	FALSE	FALSE	4.51425	1.11976	3.39449	-2.27473	21.375	7.46747	13.9076	-6.44009	0.33913	-0.0531534	-0.070562	RBP1B_ARATH	Ran-binding protein 1 homolog b	G1/S transition of mitotic cell cycle [GO:0000082]; mRNA transport [GO:0051028]; positive regulation of GTPase activity [GO:0043547]; protein import into nucleus [GO:0006606]; RNA export from nucleus [GO:0006405]; spindle organization [GO:0007051]; ubiquitin-dependent protein catabolic process [GO:0006511]	cytoplasm [GO:0005737]; nuclear pore [GO:0005643]; nucleus [GO:0005634]	Ran GTPase binding [GO:0008536]	FALSE	FALSE	0	HUMMINGBIRD	0	HUMMINGBIRD
cluster10636_1rr.inclade1.ortho2.tre	ME5	ME10	FALSE	FALSE	11.2247	5.01583	6.20891	-1.19308	19.575	6.04342	13.5315	-7.48812	0.09984	0.0367277	0.0360071	FDH_SOLTU	Formate dehydrogenase, mitochondrial (FDH) (EC 1.17.1.9) (NAD-dependent formate dehydrogenase)		mitochondrion [GO:0005739]	formate dehydrogenase (NAD+) activity [GO:0008863]; NAD binding [GO:0051287]; oxidoreductase activity, acting on the CH-OH group of donors, NAD or NADP as acceptor [GO:0016616]	FALSE	FALSE	HUMMINGBIRD	0	HUMMINGBIRD	0
cluster10637_1rr.inclade1.ortho1.tre	ME3	ME2	FALSE	FALSE	35.6729	21.4556	14.2173	7.23831	76.4359	65.3908	11.0451	54.3457	0.27894	-0.0209662	-0.0248123	SDF2_ARATH	Stromal cell-derived factor 2-like protein (AtSDF2) (SDF2-like protein)	defense response to bacterium [GO:0042742]; defense response to fungus [GO:0050832]; pathogen-associated molecular pattern dependent induction by symbiont of host innate immune response [GO:0052033]; protein glycosylation [GO:0006486]	endoplasmic reticulum [GO:0005783]; membrane [GO:0016020]	mannosyltransferase activity [GO:0000030]	FALSE	FALSE	0	0	BEE	BEE
cluster10639_1rr.inclade1.ortho4.tre	ME14	ME6	FALSE	TRUE	19.8126	8.23197	11.5806	-3.34863	40.7859	15.8729	24.913	-9.04004	0.12251	-0.0302097	0.0423084	RK12_NICSY	50S ribosomal protein L12, chloroplastic (CL12)	translation [GO:0006412]	chloroplast [GO:0009507]; ribosome [GO:0005840]	structural constituent of ribosome [GO:0003735]	FALSE	FALSE	HUMMINGBIRD	HUMMINGBIRD	HUMMINGBIRD	HUMMINGBIRD
cluster10640_1rr.inclade1.ortho4.tre	ME0	ME3	FALSE	FALSE	11.2099	2.47864	8.73123	-6.25259	17.6462	7.37926	10.2669	-2.88768	0.37238	0.0871331	0.0776355	NA	NA	NA	NA	NA	FALSE	FALSE	0	0	0	BUTTERFLY
cluster10641_1rr.inclade1.ortho2.tre	ME28	ME10	FALSE	FALSE	8.61201	1.58027	7.03174	-5.45148	12.5431	3.44648	9.09662	-5.65013	0.37897	-0.028806	0.0119332	HBL1_GOSHI	Non-symbiotic hemoglobin 1 (GOShi GLB1) (Hb1)			heme binding [GO:0020037]; metal ion binding [GO:0046872]; oxygen binding [GO:0019825]	FALSE	FALSE	HUMMINGBIRD	0	HUMMINGBIRD	0
cluster10644_1rr.inclade1.ortho5.tre	ME18	ME9	FALSE	FALSE	10.2367	5.35186	4.8848	0.467064	13.8854	3.52611	10.3593	-6.83314	0.2482	-0.0637712	-0.0178834	PMP22_ARATH	Peroxisomal membrane protein PMP22 (22 kDa peroxisomal membrane protein)		integral component of peroxisomal membrane [GO:0005779]		FALSE	FALSE	BUTTERFLY	0	BUTTERFLY	0
cluster10645_1rr.inclade1.ortho2.tre	ME5	ME35	FALSE	FALSE	11.2013	3.50793	7.69341	-4.18548	23.9895	2.80657	21.1829	-18.3764	0.33427	0.184193	0.152311	FRL4B_ARATH	FRIGIDA-like protein 4b	cell differentiation [GO:0030154]; flower development [GO:0009908]			FALSE	FALSE	HUMMINGBIRD	0	HUMMINGBIRD	0
cluster10647_1rr.inclade1.ortho2.tre	ME58	ME16	FALSE	FALSE	51.4603	3.67919	47.7811	-44.1019	99.7499	13.3369	86.4129	-73.076	0.2775	-0.0700384	0.00385473	CDKG2_ORYSJ	Cyclin-dependent kinase G-2 (CDKG;2) (EC 2.7.11.22) (EC 2.7.11.23)	protein phosphorylation [GO:0006468]; regulation of gene expression [GO:0010468]; regulation of mitotic cell cycle [GO:0007346]	nucleus [GO:0005634]	ATP binding [GO:0005524]; cyclin-dependent protein serine/threonine kinase activity [GO:0004693]; RNA polymerase II carboxy-terminal domain kinase activity [GO:0008353]	FALSE	FALSE	0	0	0	0
cluster10648_1rr.inclade1.ortho2.tre	ME5	ME43	FALSE	FALSE	11.921	5.65877	6.26224	-0.603463	9.85679	1.51914	8.33765	-6.81851	0.29237	0.0683087	0.03521	COP1_ARATH	E3 ubiquitin-protein ligase COP1 (EC 2.3.2.27) (Constitutive photomorphogenesis protein 1) (RING-type E3 ubiquitin transferase COP1)	anthocyanin-containing compound metabolic process [GO:0046283]; DNA repair [GO:0006281]; entrainment of circadian clock [GO:0009649]; photomorphogenesis [GO:0009640]; photoperiodism, flowering [GO:0048573]; ME6, far-ME6 light phototransduction [GO:0009585]; regulation of stomatal movement [GO:0010119]; shade avoidance [GO:0009641]; skotomorphogenesis [GO:0009647]	Cul4-RING E3 ubiquitin ligase complex [GO:0080008]; cytoplasm [GO:0005737]; nuclear body [GO:0016604]; nuclear ubiquitin ligase complex [GO:0000152]; nucleus [GO:0005634]	identical protein binding [GO:0042802]; metal ion binding [GO:0046872]; ubiquitin protein ligase activity [GO:0061630]; ubiquitin-protein transferase activity [GO:0004842]	FALSE	FALSE	HUMMINGBIRD	0	HUMMINGBIRD	0
cluster10650_1rr.inclade1.ortho3.tre	ME10	ME3	FALSE	FALSE	31.5583	15.5271	16.0312	-0.504066	82.2982	34.8561	47.4421	-12.586	0.23467	0.072303	0.069088	SCL13_ARATH	Scarecrow-like protein 13 (AtSCL13) (GRAS family protein 24) (AtGRAS-24)	transcription, DNA-templated [GO:0006351]	cytoplasm [GO:0005737]; nucleus [GO:0005634]	DNA-binding transcription factor activity [GO:0003700]; sequence-specific DNA binding [GO:0043565]	FALSE	FALSE	0	0	0	BUTTERFLY
cluster10652_1rr.inclade1.ortho1.tre	ME1	ME1	FALSE	FALSE	46.4592	22.1191	24.3401	-2.22107	112.273	80.7155	31.557	49.1585	0.22223	-0.0507262	0.00436814	PP153_ARATH	Pentatricopeptide repeat-containing protein At2g15690, mitochondrial	embryo development ending in seed dormancy [GO:0009793]; RNA modification [GO:0009451]	chloroplast [GO:0009507]; intracellular membrane-bounded organelle [GO:0043231]; mitochondrion [GO:0005739]	endonuclease activity [GO:0004519]; RNA binding [GO:0003723]; zinc ion binding [GO:0008270]	FALSE	FALSE	0	0	0	0
cluster10652_2rr.inclade1.ortho3.tre	ME10	ME3	FALSE	FALSE	44.3065	13.5774	30.7291	-17.1517	25.7554	14.8097	10.9457	3.86405	0.3924	0.0772142	0.0573035	PP346_ARATH	Pentatricopeptide repeat-containing protein At4g32450, mitochondrial	RNA modification [GO:0009451]	intracellular membrane-bounded organelle [GO:0043231]; mitochondrion [GO:0005739]	endonuclease activity [GO:0004519]; RNA binding [GO:0003723]; zinc ion binding [GO:0008270]	FALSE	FALSE	0	0	0	BUTTERFLY
cluster10653_1rr.inclade1.ortho3.tre	ME15	ME3	FALSE	FALSE	23.8669	9.0661	14.8008	-5.73465	44.0969	18.224	25.8729	-7.64885	0.15736	0.0606849	-0.0290988	MINE1_ARATH	Cell division topological specificity factor homolog, chloroplastic (AtMinE1) (Protein ACCUMULATION AND REPLICATION OF CHLOROPLASTS 12)	cell division [GO:0051301]; chloroplast fission [GO:0010020]; regulation of division septum assembly [GO:0032955]	chloroplast [GO:0009507]	ATPase binding [GO:0051117]; identical protein binding [GO:0042802]	FALSE	FALSE	0	0	0	BUTTERFLY
cluster10654_1rr.inclade1.ortho3.tre	ME21	ME2	FALSE	FALSE	24.7974	7.85723	16.9402	-9.08299	62.6801	54.1474	8.53277	45.6146	0.29517	-0.0858391	-0.0626694	NA	NA	NA	NA	NA	FALSE	FALSE	BEE	0	BEE	BEE
cluster10657_1rr.inclade1.ortho1.tre	ME0	ME31	FALSE	FALSE	1.7384	0.371062	1.36734	-0.99628	10.1878	2.18596	8.00183	-5.81587	0.44929	-0.00567777	-0.0125576	Y1648_ARATH	Uncharacterized protein At1g66480		plasma membrane [GO:0005886]		TRUE	FALSE	0	0	0	0
cluster10658_1rr.inclade1.ortho2.tre	ME10	ME3	FALSE	FALSE	32.4162	9.34334	23.0729	-13.7295	28.8871	18.6586	10.2285	8.43004	0.1818	0.0629614	-0.0480143	SUVH9_ARATH	Histone-lysine N-methyltransferase family member SUVH9 (Histone H3-K9 methyltransferase 9) (H3-K9-HMTase 9) (Protein SET DOMAIN GROUP 22) (Suppressor of variegation 3-9 homolog protein 9) (Su(var)3-9 homolog protein 9)	DNA mediated transformation [GO:0009294]; RNA-directed DNA methylation [GO:0080188]	chromosome, centromeric region [GO:0000775]; nucleus [GO:0005634]	DNA binding [GO:0003677]; histone-lysine N-methyltransferase activity [GO:0018024]; zinc ion binding [GO:0008270]	FALSE	FALSE	0	0	0	BUTTERFLY
cluster10659_1rr.inclade1.ortho1.tre	ME1	ME39	FALSE	FALSE	13.8544	5.49273	8.36164	-2.86891	12.5038	1.78773	10.7161	-8.92837	0.05985	-0.0186475	0.0867863	HIP31_ARATH	Heavy metal-associated isoprenylated plant protein 31 (AtHIP31)	cellular transition metal ion homeostasis [GO:0046916]; metal ion transport [GO:0030001]	cytoplasm [GO:0005737]	transition metal ion binding [GO:0046914]	FALSE	FALSE	0	0	0	0
cluster10660_1rr.inclade1.ortho1.tre	ME6	ME10	FALSE	FALSE	11.3167	3.21675	8.09994	-4.88319	11.2477	1.03217	10.2155	-9.18333	0.53548	0.0701193	0.054404	SWET1_ARATH	Bidirectional sugar transporter SWEET1 (AtSWEET1) (Protein SUGARS WILL EVENTUALLY BE EXPORTED TRANSPORTERS 1)	protein homooligomerization [GO:0051260]	endoplasmic reticulum [GO:0005783]; endoplasmic reticulum membrane [GO:0005789]; integral component of plasma membrane [GO:0005887]; plasma membrane [GO:0005886]	sugar transmembrane transporter activity [GO:0051119]	FALSE	FALSE	BEE	0	BEE	0
cluster10661_1rr.inclade1.ortho4.tre	ME14	ME21	FALSE	FALSE	23.8045	5.45776	18.3468	-12.889	36.084	5.15988	30.9241	-25.7642	0.11536	0.0263575	0.0554539	SKI30_ARATH	F-box/kelch-repeat protein SKIP30 (SKP1-interacting partner 30)	protein ubiquitination [GO:0016567]			FALSE	FALSE	HUMMINGBIRD	HUMMINGBIRD	HUMMINGBIRD	HUMMINGBIRD
cluster10662_1rr.inclade1.ortho1.tre	ME21	ME2	FALSE	FALSE	8.42434	2.17718	6.24716	-4.06999	8.32553	3.10538	5.22015	-2.11476	0.16035	-0.0537401	-0.0270399	NA	NA	NA	NA	NA	FALSE	FALSE	BEE	0	BEE	BEE
cluster10663_1rr.inclade1.ortho1.tre	ME2	ME3	FALSE	FALSE	24.0135	18.7276	5.28591	13.4416	2.97213	0.865787	2.10634	-1.24055	0.28379	-0.0691731	0.00273606	FRS5_ARATH	Protein FAR1-RELATED SEQUENCE 5	regulation of transcription, DNA-templated [GO:0006355]	nucleus [GO:0005634]	zinc ion binding [GO:0008270]	FALSE	TRUE	0	0	0	BUTTERFLY
cluster10664_1rr.inclade1.ortho2.tre	ME2	ME1	FALSE	FALSE	20.6396	9.59584	11.0438	-1.44797	27.5361	16.5228	11.0133	5.50948	0.09003	-0.0418703	-0.0189464	NRPE7_ARATH	DNA-directed RNA polymerase V subunit 7	transcription, DNA-templated [GO:0006351]	DNA-directed RNA polymerase V complex [GO:0000419]	DNA-directed 5'-3' RNA polymerase activity [GO:0003899]; single-stranded DNA binding [GO:0003697]; single-stranded RNA binding [GO:0003727]	FALSE	FALSE	0	0	0	0
cluster10666_1rr.inclade1.ortho2.tre	ME48	ME32	FALSE	FALSE	10.8584	1.58996	9.26848	-7.67853	4.06142	0.399472	3.66195	-3.26248	0.4889	-0.000672381	0.0574294	NA	NA	NA	NA	NA	FALSE	TRUE	0	BUTTERFLY	0	BUTTERFLY
cluster10667_1rr.inclade1.ortho3.tre	ME1	ME6	FALSE	FALSE	12.6889	4.86029	7.82863	-2.96833	12.6444	2.88065	9.7638	-6.88315	0.46282	-0.00172978	-0.010739	NA	NA	NA	NA	NA	FALSE	FALSE	0	HUMMINGBIRD	0	HUMMINGBIRD
cluster10668_1rr.inclade1.ortho1.tre	ME1	ME1	FALSE	FALSE	9.78401	1.57877	8.20524	-6.62647	14.5946	4.61946	9.97512	-5.35566	0.28464	0.0542139	-0.132907	PPR11_ARATH	Pentatricopeptide repeat-containing protein At1g05600	RNA modification [GO:0009451]	intracellular membrane-bounded organelle [GO:0043231]	endonuclease activity [GO:0004519]; RNA binding [GO:0003723]	FALSE	FALSE	0	0	0	0
cluster10669_1rr.inclade1.ortho1.tre	ME4	ME13	FALSE	FALSE	22.4652	9.19193	13.2733	-4.08135	6.369	1.94149	4.42751	-2.48602	0.13157	0.240494	0.079804	MIP1_ARATH	MND1-interacting protein 1 (AtMIP1)	regulation of signal transduction [GO:0009966]	cytoplasm [GO:0005737]	metal ion binding [GO:0046872]; ubiquitin-protein transferase activity [GO:0004842]	FALSE	FALSE	0	BUTTERFLY	0	BUTTERFLY
cluster10670_1rr.inclade1.ortho1.tre	ME16	ME17	FALSE	TRUE	5.02152	1.43924	3.58227	-2.14303	29.0487	7.77868	21.27	-13.4913	0.20579	0.00545917	0.0189131	NA	NA	NA	NA	NA	FALSE	FALSE	BUTTERFLY	BUTTERFLY	BUTTERFLY	BUTTERFLY
cluster10671_1rr.inclade1.ortho5.tre	ME0	ME16	FALSE	FALSE	10.2109	4.99268	5.21825	-0.225568	22.1443	4.78445	17.3599	-12.5754	0.27264	0.0164755	-0.0337005	ATL46_ARATH	RING-H2 finger protein ATL46 (EC 2.3.2.27) (RING-type E3 ubiquitin transferase ATL46)	proteasome-mediated ubiquitin-dependent protein catabolic process [GO:0043161]	integral component of membrane [GO:0016021]	metal ion binding [GO:0046872]; ubiquitin protein ligase activity [GO:0061630]	FALSE	FALSE	0	0	0	0
cluster10672_1rr.inclade1.ortho1.tre	ME0	ME31	FALSE	FALSE	1.0169	0.267535	0.749367	-0.481832	4.45552	0.50322	3.9523	-3.44908	0.30741	0.00477522	0.0549965	AATPC_ARATH	AAA-ATPase At3g50940 (EC 3.6.1.3)	response to salt stress [GO:0009651]		ATPase activity [GO:0016887]; ATP binding [GO:0005524]	TRUE	TRUE	0	0	0	0
cluster10672_2rr.inclade1.ortho2.tre	ME29	ME0	FALSE	FALSE	3.26955	0.705366	2.56419	-1.85882	4.82849	0.540421	4.28807	-3.74765	0.43884	0.0387833	0.0183491	AATPC_ARATH	AAA-ATPase At3g50940 (EC 3.6.1.3)	response to salt stress [GO:0009651]		ATPase activity [GO:0016887]; ATP binding [GO:0005524]	FALSE	FALSE	0	0	HUMMINGBIRD	0
cluster10673_1rr.inclade1.ortho2.tre	ME1	ME1	FALSE	FALSE	51.1404	38.0118	13.1286	24.8833	67.4419	42.2125	25.2295	16.983	0.45026	-0.031692	-0.0982507	ATM_ARATH	Serine/threonine-protein kinase ATM (EC 2.7.11.1) (Ataxia telangiectasia mutated homolog) (AtATM)	cellular response to DNA damage stimulus [GO:0006974]; meiotic cell cycle [GO:0051321]; regulation of response to DNA damage stimulus [GO:2001020]; RNA splicing [GO:0008380]	nucleus [GO:0005634]	ATP binding [GO:0005524]; DNA binding [GO:0003677]; protein serine/threonine kinase activity [GO:0004674]	FALSE	FALSE	0	0	0	0
cluster10675_1rr.inclade1.ortho1.tre	ME10	ME7	FALSE	FALSE	15.4111	3.68359	11.7275	-8.04393	47.1852	13.4724	33.7128	-20.2405	0.45782	0.0805377	0.120648	NA	NA	NA	NA	NA	FALSE	FALSE	0	0	0	0
cluster10678_1rr.inclade2.ortho1.tre	ME2	ME16	TRUE	FALSE	66.9753	55.0347	11.9406	43.0941	37.7241	8.65989	29.0642	-20.4043	0.07589	-0.0849891	0.0255584	GAE1_ARATH	UDP-glucuronate 4-epimerase 1 (EC 5.1.3.6) (UDP-glucuronic acid epimerase 1) (AtUGlcAE3)	defense response to fungus [GO:0050832]; defense response to Gram-negative bacterium [GO:0050829]; galacturonate biosynthetic process [GO:0033481]	endosome [GO:0005768]; Golgi apparatus [GO:0005794]; Golgi cisterna membrane [GO:0032580]; integral component of membrane [GO:0016021]; trans-Golgi network [GO:0005802]	UDP-glucuronate 4-epimerase activity [GO:0050378]	FALSE	FALSE	0	0	0	0
cluster10679_1rr.inclade1.ortho2.tre	ME1	ME9	FALSE	FALSE	35.8514	19.5436	16.3078	3.23585	72.6395	16.0968	56.5427	-40.4458	0.46345	-0.00413255	0.0222184	NA	NA	NA	NA	NA	FALSE	FALSE	0	0	0	0
cluster10680_1rr.inclade1.ortho4.tre	ME6	ME52	FALSE	FALSE	30.8639	18.2091	12.6548	5.55426	29.4125	7.31614	22.0964	-14.7802	0.35936	0.0865718	0.0582619	NA	NA	NA	NA	NA	FALSE	FALSE	BEE	0	BEE	0
cluster10681_1rr.inclade1.ortho2.tre	ME54	ME2	FALSE	FALSE	17.8816	2.59806	15.2836	-12.6855	15.441	9.18909	6.25188	2.93721	0.08506	0.0287848	-0.100208	NA	NA	NA	NA	NA	FALSE	FALSE	0	0	0	BEE
cluster10681_1rr.inclade1.ortho4.tre	ME0	ME11	FALSE	FALSE	2.51598	0.32264	2.19334	-1.8707	8.76739	3.30365	5.46374	-2.16009	0.07869	-0.0232382	0.0152268	NA	NA	NA	NA	NA	TRUE	FALSE	0	HUMMINGBIRD	0	HUMMINGBIRD
cluster10684_1rr.inclade1.ortho3.tre	ME8	ME38	FALSE	FALSE	15.5551	4.02675	11.5284	-7.50162	35.8798	7.40061	28.4791	-21.0785	0.42615	0.0432499	-0.0491643	NA	NA	NA	NA	NA	FALSE	FALSE	0	0	0	BUTTERFLY
cluster10685_1rr.inclade1.ortho3.tre	ME14	ME15	FALSE	TRUE	8.39446	0.960299	7.43417	-6.47387	7.00417	0.911208	6.09296	-5.18175	0.54408	-0.0340187	-0.0348801	CPD_ARATH	Cyclic phosphodiesterase (CPDase) (EC 3.1.4.-)	cyclic nucleotide metabolic process [GO:0009187]; tRNA splicing, via endonucleolytic cleavage and ligation [GO:0006388]	cytoplasm [GO:0005737]	2',3'-cyclic-nucleotide 3'-phosphodiesterase activity [GO:0004113]	FALSE	FALSE	HUMMINGBIRD	0	HUMMINGBIRD	0
cluster10686_1rr.inclade1.ortho1.tre	ME0	ME44	FALSE	FALSE	16.7608	5.45509	11.3057	-5.85058	11.0966	2.37466	8.7219	-6.34724	0.22695	0.051417	0.00226409	NA	NA	NA	NA	NA	FALSE	FALSE	0	0	0	0
cluster10687_1rr.inclade1.ortho1.tre	ME26	ME15	FALSE	FALSE	20.5656	7.57045	12.9952	-5.4247	30.1295	9.95296	20.1765	-10.2235	0.36717	-0.0544064	-0.0306941	PP372_ARATH	Pentatricopeptide repeat-containing protein At5g09450, mitochondrial	RNA modification [GO:0009451]	intracellular membrane-bounded organelle [GO:0043231]; mitochondrion [GO:0005739]	endonuclease activity [GO:0004519]; RNA binding [GO:0003723]	FALSE	FALSE	HUMMINGBIRD	0	HUMMINGBIRD	0
cluster10688_1rr.inclade1.ortho2.tre	ME39	ME5	FALSE	FALSE	5.35925	0.963321	4.39593	-3.43261	21.7213	11.5023	10.219	1.28322	0.44268	-0.0624791	-0.0121873	TBL44_ARATH	Protein PMR5 (Powdery mildew resistance protein 5) (Protein trichome birefringence-like 44)	cell wall organization or biogenesis [GO:0071554]; defense response [GO:0006952]; response to fungus [GO:0009620]	endoplasmic reticulum [GO:0005783]; Golgi apparatus [GO:0005794]; integral component of membrane [GO:0016021]	O-acetyltransferase activity [GO:0016413]	FALSE	FALSE	0	BEE	BUTTERFLY	BEE
cluster10689_1rr.inclade1.ortho3.tre	ME17	ME15	FALSE	TRUE	22.596	14.2447	8.35129	5.89339	34.3218	7.77597	26.5459	-18.7699	0.32834	-0.144953	-0.0622237	NA	NA	NA	NA	NA	FALSE	FALSE	0	0	0	0
cluster10690_1rr.inclade1.ortho6.tre	ME2	ME33	FALSE	FALSE	17.7786	9.09589	8.68267	0.41322	10.5422	1.38451	9.15767	-7.77316	0.27246	-0.0383447	0.0180032	PABN3_ARATH	Polyadenylate-binding protein 3 (AtPabN2) (AtPabN3) (Poly(A)-binding protein 3) (Nuclear poly(A)-binding protein 3) (Poly(A)-binding protein III) (PABIII)		nuclear speck [GO:0016607]; nucleus [GO:0005634]; vacuolar membrane [GO:0005774]	poly(A) binding [GO:0008143]; protein self-association [GO:0043621]	FALSE	FALSE	0	0	0	0
cluster10692_1rr.inclade1.ortho5.tre	ME1	ME1	FALSE	FALSE	15.6498	6.29178	9.35799	-3.06622	106.372	63.4859	42.8861	20.5998	0.60995	-0.0335562	-0.0245855	NA	NA	NA	NA	NA	FALSE	FALSE	0	0	0	0
cluster10694_1rr.inclade1.ortho2.tre	ME2	ME1	FALSE	FALSE	35.5246	24.1742	11.3504	12.8238	37.4881	21.5332	15.9549	5.57827	0.22494	-0.0208923	0.03663	NA	NA	NA	NA	NA	FALSE	FALSE	0	0	0	0
cluster10696_1rr.inclade1.ortho2.tre	ME31	ME1	FALSE	FALSE	36.2528	7.43676	28.816	-21.3793	129.382	94.0812	35.3007	58.7805	0.25133	-0.0719034	0.0184533	NA	NA	NA	NA	NA	FALSE	FALSE	0	0	0	0
cluster10699_1rr.inclade1.ortho1.tre	ME2	ME1	FALSE	FALSE	56.4164	34.162	22.2544	11.9075	78.3069	48.6443	29.6627	18.9816	0.42761	-0.0968355	-0.0587124	IDM1_ARATH	Increased DNA methylation 1 (Histone H3 acetyltransferase IDM1) (EC 2.3.1.-) (Protein ROS4) (Repressor of silencing 4)	histone H3-K14 acetylation [GO:0044154]; histone H3-K18 acetylation [GO:0043971]; histone H3-K23 acetylation [GO:0043972]; regulation of DNA methylation [GO:0044030]; regulation of transcription, DNA-templated [GO:0006355]; RNA-directed DNA methylation [GO:0080188]; transcription, DNA-templated [GO:0006351]	nucleus [GO:0005634]; plasmodesma [GO:0009506]	double-stranded methylated DNA binding [GO:0010385]; histone acetyltransferase activity [GO:0004402]; histone binding [GO:0042393]; metal ion binding [GO:0046872]	FALSE	FALSE	0	0	0	0
cluster10700_1rr.inclade1.ortho3.tre	ME3	ME0	FALSE	FALSE	3.12605	0.575728	2.55032	-1.9746	8.14947	1.23306	6.91642	-5.68336	0.21048	-0.0174267	0.0090103	CDPKJ_ORYSJ	Calcium-dependent protein kinase 19 (OsCDPK19) (OsCPK19) (EC 2.7.11.1) (Calcium-dependent protein kinase isoform 2) (OsCDPK2) (OsCPK2)	abscisic acid-activated signaling pathway [GO:0009738]; intracellular signal transduction [GO:0035556]; peptidyl-serine phosphorylation [GO:0018105]; protein autophosphorylation [GO:0046777]	cytoplasm [GO:0005737]; membrane [GO:0016020]; nucleus [GO:0005634]	ATP binding [GO:0005524]; calcium-dependent protein serine/threonine kinase activity [GO:0009931]; calcium ion binding [GO:0005509]; calmodulin binding [GO:0005516]; calmodulin-dependent protein kinase activity [GO:0004683]	FALSE	FALSE	0	0	BEE	0
cluster10701_1rr.inclade1.ortho3.tre	ME62	ME1	FALSE	FALSE	15.5509	1.83141	13.7195	-11.8881	68.7904	41.5186	27.2718	14.2468	0.1991	0.0407243	-0.0861619	CCB12_ORYSJ	Cyclin-B1-2 (G2/mitotic-specific cyclin-B1-2) (CycB1;2)	cell cycle [GO:0007049]; cell division [GO:0051301]			FALSE	FALSE	0	0	0	0
cluster10702_1rr.inclade1.ortho2.tre	ME22	ME14	TRUE	FALSE	24.1179	15.2734	8.84456	6.42882	40.1041	25.4724	14.6317	10.8407	0.16609	-0.101787	-0.0910821	SAP8_ORYSI	Zinc finger A20 and AN1 domain-containing stress-associated protein 8 (OsSAP8) (Stress-associated protein 3)			DNA binding [GO:0003677]; zinc ion binding [GO:0008270]	FALSE	FALSE	HUMMINGBIRD	HUMMINGBIRD	HUMMINGBIRD	HUMMINGBIRD
cluster10703_1rr.inclade1.ortho3.tre	ME22	ME6	FALSE	FALSE	11.4545	1.40476	10.0497	-8.64499	16.2019	2.53609	13.6658	-11.1297	0.5942	0.0375234	0.0103959	NA	NA	NA	NA	NA	FALSE	FALSE	HUMMINGBIRD	HUMMINGBIRD	HUMMINGBIRD	HUMMINGBIRD
cluster10704_1rr.inclade1.ortho2.tre	ME1	ME1	FALSE	FALSE	8.72954	3.44337	5.28617	-1.84279	20.9318	8.94909	11.9828	-3.03367	0.57276	0.0214244	-0.00530337	NA	NA	NA	NA	NA	FALSE	FALSE	0	0	0	0
cluster10705_1rr.inclade1.ortho1.tre	ME2	ME1	FALSE	FALSE	10.1978	6.62634	3.57147	3.05487	15.0431	8.31285	6.73023	1.58262	0.35013	-0.0554348	0.0363576	NA	NA	NA	NA	NA	FALSE	FALSE	0	0	0	0
cluster10706_1rr.inclade1.ortho4.tre	ME0	ME0	FALSE	FALSE	6.89032	2.05772	4.8326	-2.77487	2.80748	0.350355	2.45713	-2.10677	0.20929	0.0940038	0.0969897	CNIH2_ARATH	Probable protein cornichon homolog 2	vesicle-mediated transport [GO:0016192]	integral component of membrane [GO:0016021]		FALSE	TRUE	0	0	0	0
cluster10707_1rr.inclade1.ortho2.tre	ME33	ME5	FALSE	FALSE	6.07922	1.23816	4.84107	-3.60291	19.758	10.852	8.90593	1.94611	0.1895	-0.0029005	0.0241765	VPS2B_ARATH	Vacuolar protein sorting-associated protein 2 homolog 2 (AtVPS2-2) (Charged multivesicular body protein 2 homolog 2) (ESCRT-III complex subunit VPS2 homolog 2)	protein transport [GO:0015031]; vacuolar transport [GO:0007034]	ESCRT III complex [GO:0000815]		FALSE	FALSE	0	BEE	0	BEE
cluster10708_1rr.inclade1.ortho2.tre	ME30	ME3	FALSE	FALSE	18.337	2.06928	16.2677	-14.1985	57.0862	30.5757	26.5105	4.06516	0.25809	0.120273	-0.0394845	NPGR2_ARATH	Protein NPGR2 (NO POLLEN GERMINATION RELATED 2)		plasma membrane [GO:0005886]	calmodulin binding [GO:0005516]	FALSE	FALSE	0	0	HUMMINGBIRD	BUTTERFLY
cluster1071_1rr.inclade2.ortho3.tre	ME45	ME44	FALSE	FALSE	14.9875	2.43905	12.5485	-10.1094	37.9065	5.33	32.5765	-27.2465	0.11008	-0.0297224	-0.00783507	EF1A_MANES	Elongation factor 1-alpha (EF-1-alpha)		cytoplasm [GO:0005737]	GTPase activity [GO:0003924]; GTP binding [GO:0005525]; translation elongation factor activity [GO:0003746]	FALSE	FALSE	HUMMINGBIRD	0	HUMMINGBIRD	0
cluster10710_1rr.inclade1.ortho4.tre	ME0	ME28	FALSE	FALSE	4.21689	1.39259	2.8243	-1.43172	5.54989	0.894897	4.655	-3.7601	0.53389	0.0493631	0.00493475	NA	NA	NA	NA	NA	FALSE	FALSE	0	0	0	0
cluster10712_1rr.inclade1.ortho3.tre	ME0	ME5	FALSE	FALSE	6.44896	0.671015	5.77794	-5.10693	16.6584	7.53392	9.1245	-1.59058	0.34634	-0.0187808	-0.00160739	BH115_ARATH	Transcription factor bHLH115 (Basic helix-loop-helix protein 115) (AtbHLH115) (bHLH 115) (Transcription factor EN 134) (bHLH transcription factor bHLH115)	regulation of transcription, DNA-templated [GO:0006355]; transcription, DNA-templated [GO:0006351]	nucleus [GO:0005634]	DNA binding [GO:0003677]; protein dimerization activity [GO:0046983]	FALSE	FALSE	0	BEE	0	BEE
cluster10714_1rr.inclade1.ortho4.tre	ME2	ME3	FALSE	FALSE	9.68262	7.27033	2.41229	4.85804	25.7583	14.4461	11.3122	3.13392	0.27387	-0.0344625	0.0384614	P24D3_ARATH	Transmembrane emp24 domain-containing protein p24delta3 (p24 family protein delta1a) (p24delta1a) (p24 family protein delta3) (p24delta3)	protein transport [GO:0015031]; vesicle-mediated transport [GO:0016192]	endoplasmic reticulum membrane [GO:0005789]; integral component of membrane [GO:0016021]		FALSE	FALSE	0	0	0	BUTTERFLY
cluster10715_1rr.inclade1.ortho3.tre	ME14	ME29	FALSE	FALSE	17.4125	7.7714	9.64109	-1.86969	28.2803	4.42584	23.8545	-19.4286	0.22093	-0.0146737	0.012457	Y1259_ARATH	DCC family protein At1g52590, chloroplastic		plastoglobule [GO:0010287]		FALSE	FALSE	HUMMINGBIRD	HUMMINGBIRD	HUMMINGBIRD	HUMMINGBIRD
cluster10718_1rr.inclade1.ortho2.tre	ME14	ME4	FALSE	FALSE	13.5588	2.58058	10.9782	-8.3976	58.0257	34.9236	23.1022	11.8214	0.10437	-0.0147712	0.0831342	NA	NA	NA	NA	NA	FALSE	FALSE	HUMMINGBIRD	0	HUMMINGBIRD	0
cluster10719_1rr.inclade1.ortho2.tre	ME8	ME4	FALSE	FALSE	17.4964	8.0712	9.42522	-1.35402	32.4208	17.1156	15.3053	1.81029	0.31056	-0.0269093	-0.0206979	PP172_ARATH	Pentatricopeptide repeat-containing protein At2g27610	RNA modification [GO:0009451]	intracellular membrane-bounded organelle [GO:0043231]	endonuclease activity [GO:0004519]; RNA binding [GO:0003723]; zinc ion binding [GO:0008270]	FALSE	FALSE	0	0	0	0
cluster1072_1rr.inclade2.ortho2.tre	ME14	ME29	FALSE	FALSE	14.5784	4.06369	10.5147	-6.45105	30.1706	3.1648	27.0058	-23.841	0.13637	0.0162121	0.0472109	NA	NA	NA	NA	NA	FALSE	FALSE	HUMMINGBIRD	HUMMINGBIRD	HUMMINGBIRD	HUMMINGBIRD
cluster10721_1rr.inclade1.ortho2.tre	ME9	ME15	FALSE	FALSE	8.77588	1.37257	7.40331	-6.03074	8.15295	1.44	6.71295	-5.27294	0.29851	0.0435266	0.00408093	NA	NA	NA	NA	NA	FALSE	FALSE	HUMMINGBIRD	0	HUMMINGBIRD	0
cluster10723_1rr.inclade1.ortho1.tre	ME15	ME0	FALSE	FALSE	6.86615	1.82757	5.03858	-3.21101	2.02232	0.129262	1.89306	-1.7638	0.26528	0.0314572	0.0223288	PP133_ARATH	Pentatricopeptide repeat-containing protein At1g79540	RNA modification [GO:0009451]	intracellular membrane-bounded organelle [GO:0043231]	endonuclease activity [GO:0004519]; RNA binding [GO:0003723]	FALSE	TRUE	0	0	0	0
cluster10724_1rr.inclade1.ortho3.tre	ME50	ME9	FALSE	FALSE	4.82412	1.17175	3.65237	-2.48062	11.3371	3.20166	8.13546	-4.9338	0.54539	-0.000113987	-0.00554119	NA	NA	NA	NA	NA	FALSE	FALSE	0	0	0	0
cluster10726_1rr.inclade1.ortho1.tre	ME47	ME14	FALSE	FALSE	8.7876	1.92041	6.86719	-4.94678	33.465	16.6994	16.7656	-0.0661696	0.29353	-0.045403	-0.00704812	AVT3C_ARATH	Amino acid transporter AVT3C (AtAvt3C) (Aromatic and neutral amino acid transporter-like protein 2)	amino acid transmembrane transport [GO:0003333]; neutral amino acid transport [GO:0015804]	integral component of membrane [GO:0016021]; vacuolar membrane [GO:0005774]	amino acid transmembrane transporter activity [GO:0015171]; neutral amino acid transmembrane transporter activity [GO:0015175]	FALSE	FALSE	0	HUMMINGBIRD	0	HUMMINGBIRD
cluster10727_1rr.inclade2.ortho1.tre	ME5	ME14	FALSE	FALSE	6.68434	2.37746	4.30688	-1.92942	13.8185	3.43695	10.3816	-6.94461	0.51067	-0.00222125	0.00187667	MAKR4_ARATH	Probable membrane-associated kinase regulator 4		plasma membrane [GO:0005886]; plasmodesma [GO:0009506]		FALSE	FALSE	HUMMINGBIRD	HUMMINGBIRD	HUMMINGBIRD	HUMMINGBIRD
cluster10728_1rr.inclade1.ortho2.tre	ME30	ME0	FALSE	FALSE	10.4715	0.661561	9.80995	-9.14839	2.41963	0.149755	2.26988	-2.12012	0.524	0.094979	-0.0554758	EXOS5_ARATH	Exosome complex exonuclease RRP46 homolog (EC 3.1.13.-) (Exosome component 5) (Ribosomal RNA-processing protein 46)	nuclear mRNA surveillance [GO:0071028]; nuclear-transcribed mRNA catabolic process, exonucleolytic, 3'-5' [GO:0034427]; polyadenylation-dependent snoRNA 3'-end processing [GO:0071051]; rRNA 3'-end processing [GO:0031125]; rRNA catabolic process [GO:0016075]; U4 snRNA 3'-end processing [GO:0034475]	cytoplasmic exosome (RNase complex) [GO:0000177]; nuclear exosome (RNase complex) [GO:0000176]; nucleolus [GO:0005730]; ribosome [GO:0005840]	exonuclease activity [GO:0004527]; RNA binding [GO:0003723]	FALSE	TRUE	0	0	HUMMINGBIRD	0
cluster10729_1rr.inclade1.ortho3.tre	ME55	ME45	FALSE	FALSE	5.24828	0.610988	4.63729	-4.02631	5.42016	1.68916	3.731	-2.04184	0.46316	-0.0139522	-0.0124028	NA	NA	NA	NA	NA	FALSE	FALSE	0	0	0	0
cluster1073_1rr.inclade1.ortho10.tre	ME5	ME14	FALSE	FALSE	6.38049	3.36431	3.01617	0.348142	8.81094	2.16626	6.64467	-4.47841	0.30129	0.0249262	0.029193	C71A8_MENPI	Cytochrome P450 71A8 (EC 1.14.-.-)		integral component of membrane [GO:0016021]	heme binding [GO:0020037]; iron ion binding [GO:0005506]; monooxygenase activity [GO:0004497]; oxidoreductase activity, acting on paired donors, with incorporation or reduction of molecular oxygen [GO:0016705]	FALSE	FALSE	HUMMINGBIRD	HUMMINGBIRD	HUMMINGBIRD	HUMMINGBIRD
cluster1073_2rr.inclade1.ortho1.tre	ME0	ME29	FALSE	FALSE	11.9828	2.14434	9.83849	-7.69414	25.239	4.95109	20.2879	-15.3368	0.25964	0.00639138	0.0693366	C71A8_MENPI	Cytochrome P450 71A8 (EC 1.14.-.-)		integral component of membrane [GO:0016021]	heme binding [GO:0020037]; iron ion binding [GO:0005506]; monooxygenase activity [GO:0004497]; oxidoreductase activity, acting on paired donors, with incorporation or reduction of molecular oxygen [GO:0016705]	FALSE	FALSE	0	HUMMINGBIRD	0	HUMMINGBIRD
cluster1073_3rr.inclade2.ortho4.tre	ME28	ME41	FALSE	FALSE	4.49698	0.931055	3.56592	-2.63486	11.6086	1.59869	10.0099	-8.41119	0.29803	0.00159313	0.0411455	C71A8_MENPI	Cytochrome P450 71A8 (EC 1.14.-.-)		integral component of membrane [GO:0016021]	heme binding [GO:0020037]; iron ion binding [GO:0005506]; monooxygenase activity [GO:0004497]; oxidoreductase activity, acting on paired donors, with incorporation or reduction of molecular oxygen [GO:0016705]	FALSE	FALSE	HUMMINGBIRD	0	HUMMINGBIRD	0
cluster10731_1rr.inclade1.ortho6.tre	ME0	ME58	FALSE	FALSE	0.875461	0.102534	0.772927	-0.670392	3.09179	0.149328	2.94246	-2.79313	0.37696	-0.01828	-0.053967	NA	NA	NA	NA	NA	TRUE	TRUE	0	0	0	0
cluster10732_1rr.inclade1.ortho4.tre	ME7	ME0	FALSE	FALSE	4.85576	0.724041	4.13172	-3.40768	1.5348	0.122107	1.41269	-1.29058	0.22737	0.121822	-0.0329364	SL11_ORYSJ	E3 ubiquitin-protein ligase SPL11 (EC 2.3.2.27) (Cell death-related protein SPL11) (Protein spotted leaf 11) (RING-type E3 ubiquitin transferase SPL11)	defense response [GO:0006952]; flower development [GO:0009908]; negative regulation of defense response [GO:0031348]; negative regulation of programmed cell death [GO:0043069]; protein ubiquitination [GO:0016567]; regulation of long-day photoperiodism, flowering [GO:0048586]	cytoplasm [GO:0005737]; cytosol [GO:0005829]; nucleus [GO:0005634]	ubiquitin-protein transferase activity [GO:0004842]	FALSE	TRUE	0	0	0	0
cluster10733_1rr.inclade1.ortho3.tre	ME2	ME58	FALSE	FALSE	12.3714	7.71534	4.65602	3.05932	9.08427	1.1575	7.92677	-6.76927	0.13158	-0.0665311	-0.063539	LAZH1_ARATH	Protein LAZ1 homolog 1 (Lazarus1 homolog 1)	negative regulation of brassinosteroid mediated signaling pathway [GO:1900458]; vacuole organization [GO:0007033]; vesicle-mediated transport to the plasma membrane [GO:0098876]	integral component of membrane [GO:0016021]; plant-type vacuole membrane [GO:0009705]	transporter activity [GO:0005215]	FALSE	FALSE	0	0	0	0
cluster10734_1rr.inclade1.ortho5.tre	ME0	ME25	FALSE	FALSE	4.17354	0.69652	3.47702	-2.7805	6.05719	0.839961	5.21723	-4.37727	0.45148	0.0531173	-0.0146566	NA	NA	NA	NA	NA	FALSE	FALSE	0	0	0	0
cluster10735_1rr.inclade1.ortho2.tre	ME18	ME9	FALSE	TRUE	15.0942	4.11823	10.976	-6.85776	9.42888	2.94864	6.48023	-3.53159	0.40869	-0.0876201	0.0270409	PP310_ARATH	Pentatricopeptide repeat-containing protein At4g14190, chloroplastic	RNA modification [GO:0009451]	chloroplast [GO:0009507]; intracellular membrane-bounded organelle [GO:0043231]	endonuclease activity [GO:0004519]; RNA binding [GO:0003723]	FALSE	FALSE	BUTTERFLY	0	BUTTERFLY	0
cluster10736_1rr.inclade1.ortho2.tre	ME4	ME3	FALSE	FALSE	27.7393	11.1939	16.5454	-5.35142	15.8306	7.47621	8.35443	-0.87822	0.30304	0.0588262	0.0158604	HSF8_SOLPE	Heat shock factor protein HSF8 (Heat shock transcription factor 8) (HSTF 8) (Heat stress transcription factor)	transcription, DNA-templated [GO:0006351]	nucleus [GO:0005634]	DNA-binding transcription factor activity [GO:0003700]; sequence-specific DNA binding [GO:0043565]	FALSE	FALSE	0	0	0	BUTTERFLY
cluster10737_1rr.inclade1.ortho1.tre	ME30	ME0	FALSE	FALSE	2.39113	0.465006	1.92612	-1.46112	3.51691	0.356253	3.16066	-2.80441	0.39662	0.0122575	-0.0841401	Y3264_ARATH	Putative UPF0481 protein At3g02645		integral component of membrane [GO:0016021]		TRUE	TRUE	0	0	HUMMINGBIRD	0
cluster10737_1rr.inclade2.ortho3.tre	ME27	ME1	TRUE	TRUE	31.644	12.231	19.413	-7.18198	3.88652	1.29312	2.5934	-1.30027	0.36877	-0.110003	-0.0137969	Y3264_ARATH	Putative UPF0481 protein At3g02645		integral component of membrane [GO:0016021]		FALSE	TRUE	BEE	0	BEE	0
cluster10738_1rr.inclade1.ortho1.tre	ME0	ME4	FALSE	FALSE	1.47559	0.897359	0.578236	0.319123	12.4216	3.10323	9.31833	-6.2151	0.52133	-0.0255511	-0.0427064	Y3720_ARATH	UPF0481 protein At3g47200		integral component of membrane [GO:0016021]; plasma membrane [GO:0005886]		TRUE	FALSE	0	0	0	0
cluster10739_1rr.inclade1.ortho1.tre	ME4	ME0	FALSE	FALSE	9.71119	3.24772	6.46347	-3.21576	15.9333	0.545062	15.3883	-14.8432	0.2147	0.0951623	0.072626	Y4213_ARATH	ER membrane protein complex subunit 7 homolog		endoplasmic reticulum [GO:0005783]; ER membrane protein complex [GO:0072546]	carbohydrate binding [GO:0030246]	FALSE	FALSE	0	0	0	0
cluster10739_1rr.inclade1.ortho4.tre	ME7	ME12	FALSE	TRUE	81.3605	29.2402	52.1203	-22.8801	66.3885	9.99492	56.3936	-46.3987	0.3782	0.211735	0.0666619	Y4213_ARATH	ER membrane protein complex subunit 7 homolog		endoplasmic reticulum [GO:0005783]; ER membrane protein complex [GO:0072546]	carbohydrate binding [GO:0030246]	FALSE	FALSE	0	BUTTERFLY	0	BUTTERFLY
cluster1074_1rr.inclade1.ortho4.tre	ME0	ME28	FALSE	FALSE	8.31366	4.90622	3.40744	1.49877	16.0477	4.50512	11.5426	-7.03745	0.17767	0.0112096	0.0446169	AB11B_ARATH	ABC transporter B family member 11 (ABC transporter ABCB.11) (AtABCB11) (Multidrug resistance protein 8) (P-glycoprotein 11)	basipetal auxin transport [GO:0010540]	integral component of membrane [GO:0016021]; plasma membrane [GO:0005886]; plasmodesma [GO:0009506]	ATPase activity, coupled to transmembrane movement of substances [GO:0042626]; ATP binding [GO:0005524]; auxin efflux transmembrane transporter activity [GO:0010329]	FALSE	FALSE	0	0	0	0
cluster10742_1rr.inclade1.ortho1.tre	ME7	ME7	FALSE	FALSE	36.4488	14.8319	21.6169	-6.78494	73.5786	32.7422	40.8364	-8.09425	0.28404	0.138916	-0.0167707	NA	NA	NA	NA	NA	FALSE	FALSE	0	0	0	0
cluster10745_1rr.inclade1.ortho1.tre	ME15	ME13	FALSE	FALSE	7.47181	1.28886	6.18295	-4.89408	25.09	5.53345	19.5565	-14.0231	0.0949	-0.0216363	0.000878893	FRS7_ARATH	Protein FAR1-RELATED SEQUENCE 7	far-ME6 light signaling pathway [GO:0010018]; positive regulation of circadian rhythm [GO:0042753]; positive regulation of transcription, DNA-templated [GO:0045893]; ME6, far-ME6 light phototransduction [GO:0009585]	nucleus [GO:0005634]	DNA-binding transcription factor activity [GO:0003700]; zinc ion binding [GO:0008270]	FALSE	FALSE	0	BUTTERFLY	0	BUTTERFLY
cluster10746_1rr.inclade1.ortho1.tre	ME5	ME7	FALSE	FALSE	43.5038	15.6068	27.897	-12.2902	93.4976	31.4252	62.0724	-30.6472	0.28092	0.120605	0.139659	PP113_ARATH	Pentatricopeptide repeat-containing protein At1g71210, mitochondrial	RNA modification [GO:0009451]	intracellular membrane-bounded organelle [GO:0043231]; mitochondrion [GO:0005739]	endonuclease activity [GO:0004519]; RNA binding [GO:0003723]	FALSE	FALSE	HUMMINGBIRD	0	HUMMINGBIRD	0
cluster10747_1rr.inclade1.ortho4.tre	ME15	ME3	FALSE	FALSE	13.8549	8.24281	5.61208	2.63074	88.02	57.697	30.323	27.3741	0.21274	-0.00378953	-0.0131267	NA	NA	NA	NA	NA	FALSE	FALSE	0	0	0	BUTTERFLY
cluster10748_1rr.inclade1.ortho1.tre	ME46	ME20	FALSE	FALSE	6.79332	1.63763	5.15569	-3.51806	28.6719	7.95583	20.7161	-12.7603	0.20276	-0.0165492	0.0705979	NA	NA	NA	NA	NA	FALSE	FALSE	0	0	0	0
cluster10749_1rr.inclade1.ortho2.tre	ME12	ME3	FALSE	FALSE	26.6387	18.4776	8.16114	10.3164	21.1863	6.63211	14.5542	-7.92212	0.28	0.0282116	-0.100427	PMIR1_ARATH	Protein PLASTID MOVEMENT IMPAIRED 1-RELATED 1	actin filament-based movement [GO:0030048]; chloroplast avoidance movement [GO:0009903]; chloroplast relocation [GO:0009902]; nuclear migration along microfilament [GO:0031022]; response to ME2 light [GO:0009637]	cytoplasm [GO:0005737]		FALSE	FALSE	0	0	0	BUTTERFLY
cluster10751_1rr.inclade1.ortho4.tre	ME32	ME20	TRUE	FALSE	18.1873	6.7585	11.4288	-4.67026	37.927	15.0628	22.8642	-7.80145	0.28575	0.0801108	0.00923089	NA	NA	NA	NA	NA	FALSE	FALSE	0	0	0	0
cluster10752_1rr.inclade1.ortho1.tre	ME20	ME15	FALSE	FALSE	9.98307	2.09221	7.89086	-5.79866	14.1738	5.09754	9.0763	-3.97876	0.32797	-0.0714155	-0.0185341	PP338_ARATH	Pentatricopeptide repeat-containing protein At4g26680, mitochondrial	mitochondrial mRNA 5'-end processing [GO:0090617]; RNA modification [GO:0009451]	mitochondrion [GO:0005739]	endonuclease activity [GO:0004519]; RNA binding [GO:0003723]	FALSE	FALSE	HUMMINGBIRD	0	HUMMINGBIRD	0
cluster10753_1rr.inclade1.ortho4.tre	ME0	ME10	FALSE	FALSE	11.6322	3.16314	8.46903	-5.30589	23.3947	8.33861	15.0561	-6.71753	0.46958	0.0357438	0.0343038	NA	NA	NA	NA	NA	FALSE	FALSE	0	0	0	0
cluster10754_1rr.inclade1.ortho1.tre	ME29	ME8	FALSE	TRUE	34.3283	2.76418	31.5641	-28.7999	5.81879	1.23968	4.57912	-3.33944	0.31033	0.0771671	0.0445736	RDR6_ARATH	RNA-dependent RNA polymerase 6 (AtRDRP6) (EC 2.7.7.48) (Protein SILENCING DEFECTIVE 1) (Protein SUPPRESSOR OF GENE SILENCING 2) (RNA-directed RNA polymerase 6)	carpel development [GO:0048440]; defense response to virus [GO:0051607]; gene silencing by RNA [GO:0031047]; gynoecium development [GO:0048467]; leaf development [GO:0048366]; maintenance of shoot apical meristem identity [GO:0010492]; production of siRNA involved in RNA interference [GO:0030422]; production of ta-siRNAs involved in RNA interference [GO:0010267]; recognition of pollen [GO:0048544…	nucleus [GO:0005634]	DNA-directed DNA polymerase activity [GO:0003887]; RNA binding [GO:0003723]; RNA-directed 5'-3' RNA polymerase activity [GO:0003968]	FALSE	FALSE	0	0	HUMMINGBIRD	0
cluster10756_1rr.inclade1.ortho3.tre	ME23	ME12	FALSE	FALSE	13.2571	3.58389	9.67319	-6.08929	30.1383	9.37755	20.7607	-11.3832	0.21117	0.0515235	-0.0320151	PUP11_ARATH	Probable purine permease 11 (AtPUP11)	purine nucleobase transport [GO:0006863]	integral component of membrane [GO:0016021]; membrane [GO:0016020]	purine nucleobase transmembrane transporter activity [GO:0005345]	FALSE	FALSE	BUTTERFLY	BUTTERFLY	BUTTERFLY	BUTTERFLY
cluster1076_1rr.inclade1.ortho4.tre	ME0	ME0	FALSE	FALSE	2.31953	0.575316	1.74421	-1.1689	9.45908	1.67893	7.78015	-6.10122	0.20482	-0.0126272	-0.0762483	PMT2_ARATH	Probable methyltransferase PMT2 (EC 2.1.1.-)	methylation [GO:0032259]	cytoplasm [GO:0005737]; endosome [GO:0005768]; Golgi apparatus [GO:0005794]; Golgi membrane [GO:0000139]; integral component of membrane [GO:0016021]; membrane [GO:0016020]; trans-Golgi network [GO:0005802]	S-adenosylmethionine-dependent methyltransferase activity [GO:0008757]	TRUE	FALSE	0	0	0	0
cluster1076_1rr.inclade2.ortho2.tre	ME3	ME42	FALSE	FALSE	13.591	5.60387	7.98708	-2.38321	26.7808	5.89257	20.8882	-14.9957	0.14619	-0.125825	-0.039187	PMTE_ARATH	Probable methyltransferase PMT14 (EC 2.1.1.-)	methylation [GO:0032259]	cytoplasm [GO:0005737]; endosome [GO:0005768]; Golgi apparatus [GO:0005794]; Golgi membrane [GO:0000139]; integral component of membrane [GO:0016021]; plant-type cell wall [GO:0009505]; trans-Golgi network [GO:0005802]; vacuolar membrane [GO:0005774]	S-adenosylmethionine-dependent methyltransferase activity [GO:0008757]	FALSE	FALSE	0	0	BEE	0
cluster10760_1rr.inclade1.ortho3.tre	ME20	ME0	FALSE	FALSE	3.66566	0.800955	2.86471	-2.06375	1.09451	0.0928486	1.00166	-0.908816	0.51802	0.00449896	0.0445565	NA	NA	NA	NA	NA	FALSE	TRUE	HUMMINGBIRD	0	HUMMINGBIRD	0
cluster10761_1rr.inclade1.ortho3.tre	ME0	ME0	FALSE	FALSE	1.08881	0.450556	0.638253	-0.187697	2.57363	0.394001	2.17962	-1.78562	0.27112	-0.0422344	-0.0631325	NA	NA	NA	NA	NA	TRUE	TRUE	0	0	0	0
cluster10762_1rr.inclade1.ortho1.tre	ME4	ME0	FALSE	FALSE	17.3435	4.94467	12.3989	-7.45419	19.8537	1.07473	18.779	-17.7042	0.38201	0.0947713	0.0762832	CDF3_ARATH	Cyclic dof factor 3 (Dof zinc finger protein DOF3.3) (AtDOF3.3) (H-protein promoter-binding factor 2a)	flower development [GO:0009908]; regulation of transcription, DNA-templated [GO:0006355]; transcription, DNA-templated [GO:0006351]	nucleus [GO:0005634]	DNA binding [GO:0003677]; DNA-binding transcription factor activity [GO:0003700]; metal ion binding [GO:0046872]	FALSE	FALSE	0	0	0	0
cluster10763_1rr.inclade1.ortho3.tre	ME29	ME12	FALSE	FALSE	22.3169	1.94229	20.3746	-18.4323	11.1994	3.53966	7.65974	-4.12008	0.30036	0.0963446	0.0460699	Y3990_ARATH	BTB/POZ domain-containing protein At3g49900	protein ubiquitination [GO:0016567]			FALSE	FALSE	0	BUTTERFLY	HUMMINGBIRD	BUTTERFLY
cluster10764_1rr.inclade1.ortho2.tre	ME3	ME2	FALSE	FALSE	47.5944	30.3474	17.2469	13.1005	81.1434	69.7872	11.3562	58.431	0.18992	-0.0776321	-0.0443156	NFXL1_ARATH	NF-X1-type zinc finger protein NFXL1 (AtNFXL1) (EC 2.3.2.-)	defense response to bacterium [GO:0042742]; negative regulation of transcription by RNA polymerase II [GO:0000122]; protein ubiquitination [GO:0016567]; regulation of hydrogen peroxide metabolic process [GO:0010310]; response to light intensity [GO:0009642]; response to microbial phytotoxin [GO:0010188]; response to salt stress [GO:0009651]; salicylic acid biosynthetic process [GO:0009697]; trans…	nucleus [GO:0005634]	mRNA binding [GO:0003729]; RNA polymerase II regulatory region sequence-specific DNA binding [GO:0000977]; transcriptional repressor activity, RNA polymerase II proximal promoter sequence-specific DNA binding [GO:0001078]; transferase activity [GO:0016740]; zinc ion binding [GO:0008270]	FALSE	FALSE	0	0	BEE	BEE
cluster10765_1rr.inclade1.ortho1.tre	ME5	ME8	FALSE	FALSE	4.33713	1.24888	3.08825	-1.83936	4.77747	1.3871	3.39037	-2.00327	0.2116	0.0612992	-0.0601819	CIGR1_ORYSJ	Chitin-inducible gibberellin-responsive protein 1	regulation of transcription, DNA-templated [GO:0006355]; transcription, DNA-templated [GO:0006351]	nucleus [GO:0005634]	DNA-binding transcription factor activity [GO:0003700]; sequence-specific DNA binding [GO:0043565]	FALSE	FALSE	HUMMINGBIRD	0	HUMMINGBIRD	0
cluster10766_1rr.inclade1.ortho4.tre	ME28	ME9	FALSE	FALSE	10.699	4.18993	6.50904	-2.31911	13.9473	2.58068	11.3666	-8.78591	0.22326	-0.0394734	-0.0272164	GT14C_ARATH	Beta-glucuronosyltransferase GlcAT14C (EC 2.4.1.-) (GT14 family glucuronic acid transferase 3) (AtGlcAT14C)		Golgi membrane [GO:0000139]; integral component of membrane [GO:0016021]	acetylglucosaminyltransferase activity [GO:0008375]; glucuronosyltransferase activity [GO:0015020]	FALSE	FALSE	HUMMINGBIRD	0	HUMMINGBIRD	0
cluster10767_1rr.inclade1.ortho2.tre	ME12	ME19	FALSE	TRUE	11.8165	4.22765	7.58885	-3.36119	12.6999	3.46485	9.23506	-5.7702	0.18083	-0.0122059	0.0178303	GONS3_ARATH	GDP-mannose transporter GONST3 (Protein GOLGI NUCLEOTIDE SUGAR TRANSPORTER 3)	carbohydrate transport [GO:0008643]; nucleotide-sugar transmembrane transport [GO:0015780]	Golgi membrane [GO:0000139]; integral component of membrane [GO:0016021]	antiporter activity [GO:0015297]	FALSE	FALSE	0	0	0	0
cluster10768_1rr.inclade1.ortho1.tre	ME4	ME34	FALSE	FALSE	8.91819	2.69269	6.2255	-3.53281	12.3545	1.85066	10.5038	-8.65317	0.52713	0.0871231	0.0841558	CDF3_ARATH	Cyclic dof factor 3 (Dof zinc finger protein DOF3.3) (AtDOF3.3) (H-protein promoter-binding factor 2a)	flower development [GO:0009908]; regulation of transcription, DNA-templated [GO:0006355]; transcription, DNA-templated [GO:0006351]	nucleus [GO:0005634]	DNA binding [GO:0003677]; DNA-binding transcription factor activity [GO:0003700]; metal ion binding [GO:0046872]	FALSE	FALSE	0	0	0	0
cluster10769_1rr.inclade1.ortho2.tre	ME5	ME4	FALSE	FALSE	4.65601	0.85492	3.80109	-2.94617	50.299	22.6561	27.6429	-4.98684	0.49883	0.0855248	0.0862803	CBSX2_ARATH	CBS domain-containing protein CBSX2, chloroplastic (CBS domain-containing protein 1) (AtCDCP1) (Protein LOSS OF THE TIMING OF ET AND JA BIOSYNTHESIS 1) (AtLEJ1)	cell redox homeostasis [GO:0045454]	chloroplast [GO:0009507]; chloroplast stroma [GO:0009570]		FALSE	FALSE	HUMMINGBIRD	0	HUMMINGBIRD	0
cluster10769_1rr.inclade1.ortho3.tre	ME27	ME2	FALSE	FALSE	31.8002	12.0859	19.7143	-7.62841	35.7865	24.753	11.0335	13.7196	0.35532	-0.0682994	-0.0880741	CBSX1_ARATH	CBS domain-containing protein CBSX1, chloroplastic (CBS domain-containing protein 2) (AtCDCP2) (Protein LOSS OF THE TIMING OF ET AND JA BIOSYNTHESIS 2) (AtLEJ2)	cell redox homeostasis [GO:0045454]	chloroplast [GO:0009507]		FALSE	FALSE	BEE	0	BEE	BEE
cluster10770_1rr.inclade1.ortho2.tre	ME1	ME1	FALSE	FALSE	24.0856	12.2527	11.8328	0.419922	54.896	36.7905	18.1054	18.6851	0.29232	-0.0944583	-0.0443019	NA	NA	NA	NA	NA	FALSE	FALSE	0	0	0	0
cluster10771_1rr.inclade1.ortho1.tre	ME5	ME4	FALSE	FALSE	30.1695	6.87011	23.2994	-16.4292	21.5834	6.19516	15.3882	-9.19308	0.348	0.0403764	0.0402629	NA	NA	NA	NA	NA	FALSE	FALSE	HUMMINGBIRD	0	HUMMINGBIRD	0
cluster10772_1rr.inclade1.ortho2.tre	ME18	ME9	FALSE	FALSE	19.53	6.50372	13.0262	-6.52253	14.0196	4.58734	9.43224	-4.8449	0.5854	-0.0776176	0.0119661	SCRL1_ORYSJ	SCAR-like protein 1	actin cytoskeleton organization [GO:0030036]	cytoplasm [GO:0005737]; cytoskeleton [GO:0005856]	actin binding [GO:0003779]	FALSE	FALSE	BUTTERFLY	0	BUTTERFLY	0
cluster10773_1rr.inclade1.ortho1.tre	ME0	ME14	FALSE	FALSE	4.81477	0.479691	4.33508	-3.85539	22.4995	7.21916	15.2803	-8.06114	0.42083	0.0226848	-0.0144163	LYK5_ARATH	Protein LYK5 (LysM domain receptor-like kinase 5) (LysM-containing receptor-like kinase 5)	cell surface receptor signaling pathway [GO:0007166]; cellular response to chitin [GO:0071323]; innate immune response [GO:0045087]; protein phosphorylation [GO:0006468]	integral component of membrane [GO:0016021]; plasma membrane [GO:0005886]	ATP binding [GO:0005524]; chitin binding [GO:0008061]; protein homodimerization activity [GO:0042803]; transmembrane receptor protein serine/threonine kinase activity [GO:0004675]	FALSE	FALSE	0	HUMMINGBIRD	0	HUMMINGBIRD
cluster10775_1rr.inclade1.ortho1.tre	ME9	ME4	TRUE	FALSE	36.3062	21.5278	14.7783	6.74954	88.8629	58.5247	30.3382	28.1865	0.25101	0.0398343	0.0690461	NA	NA	NA	NA	NA	FALSE	FALSE	HUMMINGBIRD	0	HUMMINGBIRD	0
cluster10776_1rr.inclade1.ortho1.tre	ME36	ME1	FALSE	FALSE	5.68382	0.925878	4.75794	-3.83206	7.06783	1.53474	5.53309	-3.99835	0.29526	-0.0828277	-0.105476	PP242_ARATH	Putative pentatricopeptide repeat-containing protein At3g18840	RNA modification [GO:0009451]	intracellular membrane-bounded organelle [GO:0043231]	endonuclease activity [GO:0004519]; RNA binding [GO:0003723]	FALSE	FALSE	HUMMINGBIRD	0	HUMMINGBIRD	0
cluster10778_1rr.inclade1.ortho1.tre	ME8	ME39	FALSE	FALSE	11.0235	4.01823	7.00524	-2.987	21.0428	2.81143	18.2314	-15.42	0.25761	0.0279052	0.0668563	GXM1_ARATH	Glucuronoxylan 4-O-methyltransferase 1 (EC 2.1.1.112)	xylan biosynthetic process [GO:0045492]; xylan metabolic process [GO:0045491]	Golgi apparatus [GO:0005794]; Golgi membrane [GO:0000139]; integral component of membrane [GO:0016021]	glucuronoxylan 4-O-methyltransferase activity [GO:0030775]	FALSE	FALSE	0	0	0	0
cluster10778_2rr.inclade1.ortho2.tre	ME28	ME54	FALSE	FALSE	4.59965	0.65357	3.94608	-3.29251	7.67125	0.901323	6.76993	-5.8686	0.21385	-0.0684106	-0.00670368	GXM3_ARATH	Glucuronoxylan 4-O-methyltransferase 3 (EC 2.1.1.112)	lignin metabolic process [GO:0009808]; polysaccharide metabolic process [GO:0005976]; xylan biosynthetic process [GO:0045492]; xylan metabolic process [GO:0045491]	Golgi apparatus [GO:0005794]; Golgi membrane [GO:0000139]; integral component of membrane [GO:0016021]	glucuronoxylan 4-O-methyltransferase activity [GO:0030775]	FALSE	FALSE	HUMMINGBIRD	0	HUMMINGBIRD	HUMMINGBIRD
cluster10779_1rr.inclade1.ortho3.tre	ME34	ME3	FALSE	FALSE	28.7276	2.30347	26.4241	-24.1206	37.517	13.3511	24.1659	-10.8149	0.19467	0.087527	0.109496	SRC2_SOYBN	Protein SRC2 (Protein SOYBEAN GENE REGULATED BY COLD 2)		endoplasmic reticulum membrane [GO:0005789]; integral component of membrane [GO:0016021]; plasma membrane [GO:0005886]; protein storage vacuole membrane [GO:0032586]		FALSE	FALSE	HUMMINGBIRD	0	HUMMINGBIRD	BUTTERFLY
cluster1078_1rr.inclade2.ortho5.tre	ME0	ME10	FALSE	FALSE	5.63536	1.32885	4.30651	-2.97767	19.7432	4.94487	14.7983	-9.85343	0.21967	0.0211296	0.0497699	NA	NA	NA	NA	NA	FALSE	FALSE	0	0	0	0
cluster10780_1rr.inclade1.ortho1.tre	ME0	ME1	FALSE	FALSE	6.13751	0.489122	5.64839	-5.15927	16.1964	5.07839	11.118	-6.03962	0.11455	-0.0463703	0.00384276	ISAM1_ARATH	Iron-sulfur assembly protein IscA-like 1, mitochondrial	iron-sulfur cluster assembly [GO:0016226]; protein maturation by iron-sulfur cluster transfer [GO:0097428]	mitochondrial matrix [GO:0005759]	2 iron, 2 sulfur cluster binding [GO:0051537]; ferrous iron binding [GO:0008198]; structural molecule activity [GO:0005198]	FALSE	FALSE	0	0	0	0
cluster10781_1rr.inclade1.ortho3.tre	ME24	ME2	FALSE	FALSE	13.1881	2.11041	11.0777	-8.96732	25.9069	6.00913	19.8978	-13.8887	0.36822	-0.0327884	0.0103086	ATL64_ARATH	RING-H2 finger protein ATL64 (EC 2.3.2.27) (RING-type E3 ubiquitin transferase ATL64)	cellular response to osmotic stress [GO:0071470]; proteasome-mediated ubiquitin-dependent protein catabolic process [GO:0043161]; regulation of endocytosis [GO:0030100]; regulation of response to salt stress [GO:1901000]	early endosome [GO:0005769]; Golgi-associated vesicle [GO:0005798]; integral component of membrane [GO:0016021]; plasma membrane [GO:0005886]	metal ion binding [GO:0046872]; ubiquitin protein ligase activity [GO:0061630]	FALSE	FALSE	0	0	0	BEE
cluster10782_1rr.inclade1.ortho1.tre	ME13	ME18	FALSE	FALSE	26.9704	5.86548	21.1049	-15.2394	15.4134	3.93433	11.4791	-7.54476	0.02974	0.0368519	0.022249	SMD3B_ARATH	Small nuclear ribonucleoprotein SmD3b (SmD3-b) (snRNP core protein D3-b)	developmental growth [GO:0048589]; mRNA splicing, via spliceosome [GO:0000398]; spliceosomal complex assembly [GO:0000245]; spliceosomal snRNP assembly [GO:0000387]	catalytic step 2 spliceosome [GO:0071013]; commitment complex [GO:0000243]; cytosol [GO:0005829]; nucleolus [GO:0005730]; pICln-Sm protein complex [GO:0034715]; precatalytic spliceosome [GO:0071011]; prespliceosome [GO:0071010]; SMN-Sm protein complex [GO:0034719]; spliceosomal tri-snRNP complex [GO:0097526]; U12-type spliceosomal complex [GO:0005689]; U1 snRNP [GO:0005685]; U2 snRNP [GO:0005686]…	RNA binding [GO:0003723]	FALSE	FALSE	HUMMINGBIRD	HUMMINGBIRD	HUMMINGBIRD	HUMMINGBIRD
cluster10783_1rr.inclade1.ortho3.tre	ME10	ME3	FALSE	FALSE	43.4576	12.5168	30.9408	-18.424	41.8096	10.9049	30.9047	-19.9999	0.10311	0.0834893	0.0245737	GLUD1_ORYSJ	Glutelin type-D 1 [Cleaved into: Glutelin type-D 1 acidic chain; Glutelin type-D 1 basic chain]		protein storage vacuole [GO:0000326]	nutrient reservoir activity [GO:0045735]	FALSE	FALSE	0	0	0	BUTTERFLY
cluster10784_1rr.inclade1.ortho1.tre	ME9	ME4	FALSE	FALSE	26.2789	11.8995	14.3794	-2.47992	23.899	9.10027	14.7987	-5.69848	0.33823	0.0535481	0.0683207	PP202_ARATH	Pentatricopeptide repeat-containing protein At2g45350, chloroplastic (Protein CHLORORESPIRATORY REDUCTION 4)	chloroplast RNA modification [GO:1900865]; chloroplast RNA processing [GO:0031425]; mRNA modification [GO:0016556]; mRNA processing [GO:0006397]	chloroplast [GO:0009507]; vacuole [GO:0005773]	endonuclease activity [GO:0004519]; RNA binding [GO:0003723]	FALSE	FALSE	HUMMINGBIRD	0	HUMMINGBIRD	0
cluster10784_2rr.inclade1.ortho3.tre	ME32	ME19	FALSE	FALSE	10.2696	1.76572	8.5039	-6.73819	28.3778	4.64158	23.7363	-19.0947	0.44929	0.0356938	-0.0450228	PP249_ARATH	Pentatricopeptide repeat-containing protein At3g22690	RNA modification [GO:0009451]	intracellular membrane-bounded organelle [GO:0043231]	endonuclease activity [GO:0004519]; RNA binding [GO:0003723]; zinc ion binding [GO:0008270]	FALSE	FALSE	0	0	0	0
cluster10785_1rr.inclade1.ortho4.tre	ME0	ME47	FALSE	FALSE	20.097	3.68721	16.4097	-12.7225	39.0109	4.9356	34.0753	-29.1397	0.24293	0.159218	-0.00641075	FK151_ARATH	Peptidyl-prolyl cis-trans isomerase FKBP15-1 (PPIase FKBP15-1) (EC 5.2.1.8) (15 kDa FK506-binding protein) (15 kDa FKBP) (FK506-binding protein 15-1) (AtFKBP15-1) (FK506-binding protein 2-1) (Immunophilin FKBP15-1) (Rotamase)	chaperone-mediated protein folding [GO:0061077]	endoplasmic reticulum [GO:0005783]; endoplasmic reticulum lumen [GO:0005788]	FK506 binding [GO:0005528]; peptidyl-prolyl cis-trans isomerase activity [GO:0003755]	FALSE	FALSE	0	0	0	0
cluster10786_1rr.inclade1.ortho1.tre	ME4	ME13	FALSE	FALSE	6.40917	1.99741	4.41176	-2.41435	10.782	3.25126	7.53071	-4.27945	0.16039	0.00788741	0.0730024	MYB5_ARATH	Transcription repressor MYB5 (AtM2) (Myb-related protein 5) (AtMYB5)	mucilage biosynthetic process involved in seed coat development [GO:0048354]; regulation of gene expression [GO:0010468]; regulation of transcription by RNA polymerase II [GO:0006357]; seed coat development [GO:0010214]; transcription, DNA-templated [GO:0006351]; trichome morphogenesis [GO:0010090]	nucleus [GO:0005634]	DNA-binding transcription factor activity [GO:0003700]; RNA polymerase II transcription factor activity, sequence-specific DNA binding [GO:0000981]; sequence-specific DNA binding [GO:0043565]; transcription factor activity, RNA polymerase II transcription factor recruiting [GO:0001135]; transcription regulatory region DNA binding [GO:0044212]	FALSE	FALSE	0	BUTTERFLY	0	BUTTERFLY
cluster10787_1rr.inclade1.ortho1.tre	ME23	ME12	FALSE	FALSE	4.74629	0.920499	3.82579	-2.90529	12.5237	2.50814	10.0156	-7.50742	0.22338	0.0121941	0.0558848	SERB2_ARATH	Phosphoserine aminotransferase 2, chloroplastic (AtPSAT2) (EC 2.6.1.52)	L-serine biosynthetic process [GO:0006564]; response to cadmium ion [GO:0046686]	chloroplast [GO:0009507]; chloroplast stroma [GO:0009570]; chloroplast thylakoid [GO:0009534]	O-phospho-L-serine:2-oxoglutarate aminotransferase activity [GO:0004648]	FALSE	FALSE	BUTTERFLY	BUTTERFLY	BUTTERFLY	BUTTERFLY
cluster10788_1rr.inclade1.ortho1.tre	ME62	ME3	FALSE	FALSE	6.79016	0.446681	6.34348	-5.8968	7.48575	3.34142	4.14433	-0.802905	0.12203	0.045021	0.034956	RAV1_ARATH	AP2/ERF and B3 domain-containing transcription factor RAV1 (Ethylene-responsive transcription factor RAV1) (Protein RELATED TO ABI3/VP1 1)	ethylene-activated signaling pathway [GO:0009873]; lateral root development [GO:0048527]; leaf development [GO:0048366]; negative regulation of flower development [GO:0009910]; negative regulation of transcription, DNA-templated [GO:0045892]; response to brassinosteroid [GO:0009741]; transcription, DNA-templated [GO:0006351]	nucleus [GO:0005634]	DNA binding [GO:0003677]; DNA-binding transcription factor activity [GO:0003700]	FALSE	FALSE	0	0	0	BUTTERFLY
cluster10788_1rr.inclade2.ortho2.tre	ME9	ME4	FALSE	FALSE	8.94022	2.58472	6.35549	-3.77077	27.928	12.1034	15.8246	-3.72113	0.28441	0.0469566	-0.0360058	RAV1_ARATH	AP2/ERF and B3 domain-containing transcription factor RAV1 (Ethylene-responsive transcription factor RAV1) (Protein RELATED TO ABI3/VP1 1)	ethylene-activated signaling pathway [GO:0009873]; lateral root development [GO:0048527]; leaf development [GO:0048366]; negative regulation of flower development [GO:0009910]; negative regulation of transcription, DNA-templated [GO:0045892]; response to brassinosteroid [GO:0009741]; transcription, DNA-templated [GO:0006351]	nucleus [GO:0005634]	DNA binding [GO:0003677]; DNA-binding transcription factor activity [GO:0003700]	FALSE	FALSE	HUMMINGBIRD	0	HUMMINGBIRD	0
cluster10789_1rr.inclade1.ortho1.tre	ME3	ME2	FALSE	FALSE	45.6413	30.5928	15.0485	15.5443	77.6315	59.8425	17.7891	42.0534	0.10762	-0.0182829	0.0202905	GLX1_ARATH	Lactoylglutathione lyase GLX1 (EC 4.4.1.5) (Glyoxalase I) (AtGLX1) (GlyI)	methylglyoxal catabolic process to D-lactate via S-lactoyl-glutathione [GO:0019243]; response to cadmium ion [GO:0046686]	chloroplast envelope [GO:0009941]; cytosol [GO:0005829]; peroxisome [GO:0005777]; plasma membrane [GO:0005886]; vacuole [GO:0005773]	dioxygenase activity [GO:0051213]; lactoylglutathione lyase activity [GO:0004462]; metal ion binding [GO:0046872]	FALSE	FALSE	0	0	BEE	BEE
cluster10790_1rr.inclade1.ortho3.tre	ME22	ME37	FALSE	FALSE	8.98703	2.68675	6.30028	-3.61352	21.3127	2.05557	19.2572	-17.2016	0.47758	-0.0181052	-0.0131597	ATP4_IPOBA	ATP synthase subunit delta', mitochondrial (F-ATPase delta' subunit)	ATP synthesis coupled proton transport [GO:0015986]	mitochondrial inner membrane [GO:0005743]; proton-transporting ATP synthase complex, catalytic core F(1) [GO:0045261]	proton-transporting ATP synthase activity, rotational mechanism [GO:0046933]	FALSE	FALSE	HUMMINGBIRD	0	HUMMINGBIRD	0
cluster10791_1rr.inclade1.ortho5.tre	ME1	ME16	FALSE	FALSE	37.1053	25.7923	11.313	14.4792	38.5676	9.15314	29.4145	-20.2613	0.39088	-0.00556817	0.00455003	LBD37_ARATH	LOB domain-containing protein 37 (ASYMMETRIC LEAVES 2-like protein 39) (AS2-like protein 39)	nitrogen compound metabolic process [GO:0006807]; simple leaf morphogenesis [GO:0060776]			FALSE	FALSE	0	0	0	0
cluster10791_1rr.inclade2.ortho1.tre	ME43	ME10	FALSE	FALSE	4.27489	1.10736	3.16754	-2.06018	10.1512	2.0479	8.10325	-6.05535	0.38118	-0.0507176	-0.000484173	NA	NA	NA	NA	NA	FALSE	FALSE	0	0	0	0
cluster10792_1rr.inclade1.ortho2.tre	ME6	ME5	FALSE	FALSE	16.8783	3.9043	12.974	-9.06973	35.3737	12.708	22.6657	-9.95767	0.35133	0.064328	0.0207671	ASPA_ARATH	Aspartyl protease family protein At5g10770 (EC 3.4.23.-)	protein catabolic process [GO:0030163]; proteolysis [GO:0006508]	anchored component of membrane [GO:0031225]; plasma membrane [GO:0005886]	aspartic-type endopeptidase activity [GO:0004190]	FALSE	FALSE	BEE	BEE	BEE	BEE
cluster10794_1rr.inclade1.ortho2.tre	ME64	ME8	TRUE	FALSE	10.0277	3.05963	6.96811	-3.90848	9.48594	2.54611	6.93983	-4.39373	0.40743	-0.0692008	-0.003949	XB32_ORYSJ	Probable E3 ubiquitin-protein ligase XBOS32 (EC 2.3.2.27) (Ankyrin repeat domain and RING finger-containing protein XBOS32) (RING-type E3 ubiquitin transferase XBOS32) (XB3 protein homolog 2)	protein ubiquitination [GO:0016567]		metal ion binding [GO:0046872]; transferase activity [GO:0016740]	FALSE	FALSE	0	0	0	0
cluster10798_1rr.inclade1.ortho1.tre	ME11	ME4	FALSE	FALSE	2.08767	0.318189	1.76948	-1.45129	8.16491	3.35988	4.80503	-1.44514	0.56247	0.0522615	0.0386802	NA	NA	NA	NA	NA	TRUE	FALSE	0	0	0	0
cluster10799_1rr.inclade1.ortho2.tre	ME29	ME47	FALSE	FALSE	14.2556	3.95177	10.3039	-6.35209	3.71182	0.386659	3.32516	-2.9385	0.24947	0.0678978	0.0362152	VQ4_ARATH	VQ motif-containing protein 4 (AtVQ4) (MPK3/6-targeted VQ-motif-containing protein 1)	defense response [GO:0006952]; negative regulation of cellular defense response [GO:0051245]; negative regulation of DNA-binding transcription factor activity [GO:0043433]	nucleus [GO:0005634]		FALSE	TRUE	0	0	HUMMINGBIRD	0
cluster10801_1rr.inclade1.ortho2.tre	ME7	ME0	FALSE	FALSE	36.2308	13.3353	22.8955	-9.56026	7.04659	0.837612	6.20897	-5.37136	0.27463	0.0786782	-0.0527563	UNCL_ARATH	Serine/threonine-protein kinase UCNL (EC 2.7.11.1) (AGC serine/threonine-protein kinase subfamily 2 member 4) (Protein UNICORN-LIKE)	intracellular signal transduction [GO:0035556]	cytoplasm [GO:0005737]; nucleus [GO:0005634]; plasma membrane [GO:0005886]	ATP binding [GO:0005524]; kinase activity [GO:0016301]; protein serine/threonine kinase activity [GO:0004674]	FALSE	FALSE	0	0	0	0
cluster10801_1rr.inclade2.ortho1.tre	ME27	ME2	FALSE	FALSE	6.87255	1.76927	5.10328	-3.33401	50.1122	43.0518	7.06045	35.9913	0.30107	-0.0710714	-0.0157544	UNC_ARATH	Serine/threonine-protein kinase UCN (EC 2.7.11.1) (AGC serine/threonine-protein kinase subfamily 2 member 3) (Protein UNICORN)	integument development [GO:0080060]; intracellular signal transduction [GO:0035556]; negative regulation of cell division [GO:0051782]; protein trans-autophosphorylation [GO:0036290]	cytoplasm [GO:0005737]; nucleus [GO:0005634]; plasma membrane [GO:0005886]	ATP binding [GO:0005524]; kinase activity [GO:0016301]; protein kinase activity [GO:0004672]; protein serine/threonine kinase activity [GO:0004674]; transcription factor binding [GO:0008134]	FALSE	FALSE	BEE	0	BEE	BEE
cluster10802_1rr.inclade1.ortho3.tre	ME22	ME14	FALSE	FALSE	5.57216	1.02794	4.54423	-3.51629	6.14293	1.29238	4.85055	-3.55818	0.05848	-0.0248313	-0.0652445	NTF3_TOBAC	Mitogen-activated protein kinase homolog NTF3 (EC 2.7.11.24) (P43)		intracellular [GO:0005622]	ATP binding [GO:0005524]; MAP kinase activity [GO:0004707]	FALSE	FALSE	HUMMINGBIRD	HUMMINGBIRD	HUMMINGBIRD	HUMMINGBIRD
cluster10803_1rr.inclade1.ortho1.tre	ME32	ME7	FALSE	FALSE	16.026	2.1007	13.9253	-11.8246	20.8949	6.02577	14.8692	-8.84341	0.27153	0.0443686	-0.0522487	PP385_ARATH	Pentatricopeptide repeat-containing protein At5g15300	RNA modification [GO:0009451]	intracellular membrane-bounded organelle [GO:0043231]	endonuclease activity [GO:0004519]; RNA binding [GO:0003723]	FALSE	FALSE	0	0	0	0
cluster10804_1rr.inclade1.ortho1.tre	ME0	ME0	FALSE	FALSE	3.87156	0.776178	3.09539	-2.31921	3.02756	0.295834	2.73173	-2.4359	0.34649	0.0180947	0.0128701	NA	NA	NA	NA	NA	FALSE	TRUE	0	0	0	0
cluster10804_2rr.inclade1.ortho3.tre	ME17	ME15	FALSE	FALSE	10.9203	3.25919	7.66107	-4.40188	17.4027	3.74975	13.6529	-9.90315	0.20499	-0.0466957	-0.150539	NA	NA	NA	NA	NA	FALSE	FALSE	0	0	0	0
cluster10805_1rr.inclade1.ortho1.tre	ME13	ME18	FALSE	FALSE	7.02113	3.25437	3.76676	-0.512391	8.48615	1.69911	6.78704	-5.08793	0.21853	0.0289334	0.0517305	ATL42_ARATH	E3 ubiquitin-protein ligase ATL42 (EC 2.3.2.27) (RING-H2 finger protein ATL42) (RING-type E3 ubiquitin transferase ATL42)	proteasome-mediated ubiquitin-dependent protein catabolic process [GO:0043161]; protein ubiquitination [GO:0016567]	integral component of membrane [GO:0016021]	metal ion binding [GO:0046872]; ubiquitin protein ligase activity [GO:0061630]; ubiquitin-protein transferase activity [GO:0004842]	FALSE	FALSE	HUMMINGBIRD	HUMMINGBIRD	HUMMINGBIRD	HUMMINGBIRD
cluster10807_1rr.inclade1.ortho1.tre	ME1	ME1	FALSE	FALSE	1.96275	0.897451	1.0653	-0.16785	54.4677	34.6377	19.83	14.8077	0.2273	-0.01761	-0.0133632	RTH_ARATH	Protein RTE1-HOMOLOG		integral component of membrane [GO:0016021]		TRUE	FALSE	0	0	0	0
cluster10811_1rr.inclade1.ortho3.tre	ME2	ME16	FALSE	FALSE	12.7086	6.05474	6.65383	-0.599091	14.2381	3.78718	10.4509	-6.6637	0.2302	-0.0813444	-0.0248146	UGPI7_ARATH	Uncharacterized GPI-anchored protein At4g28100		anchored component of membrane [GO:0031225]; anchored component of plasma membrane [GO:0046658]		FALSE	FALSE	0	0	0	0
cluster10812_1rr.inclade1.ortho1.tre	ME10	ME3	FALSE	FALSE	34.4054	10.9215	23.4839	-12.5623	9.09404	4.23853	4.85552	-0.616986	0.30216	0.065	0.023666	NA	NA	NA	NA	NA	FALSE	FALSE	0	0	0	BUTTERFLY
cluster10813_1rr.inclade1.ortho2.tre	ME2	ME1	FALSE	FALSE	34.3474	22.5087	11.8387	10.67	56.7512	40.3608	16.3904	23.9704	0.32662	-0.134862	-0.11956	BEH2_ARATH	BES1/BZR1 homolog protein 2	brassinosteroid mediated signaling pathway [GO:0009742]; transcription, DNA-templated [GO:0006351]		DNA binding [GO:0003677]; DNA-binding transcription factor activity [GO:0003700]	FALSE	FALSE	0	0	0	0
cluster10814_1rr.inclade1.ortho2.tre	ME1	ME0	FALSE	FALSE	17.37	9.31699	8.05301	1.26398	7.34497	1.9574	5.38757	-3.43016	0.19251	-0.0792419	0.0262578	NA	NA	NA	NA	NA	FALSE	FALSE	0	0	0	0
cluster10815_1rr.inclade1.ortho1.tre	ME54	ME49	FALSE	FALSE	7.18378	0.479925	6.70385	-6.22393	4.9911	0.771318	4.21979	-3.44847	0.75057	0.0310289	-0.00972336	CSPLD_POPTR	CASP-like protein 1D1 (PtCASPL1D1)	oxidation-reduction process [GO:0055114]	integral component of membrane [GO:0016021]; plasma membrane [GO:0005886]	iron-sulfur cluster binding [GO:0051536]	FALSE	FALSE	0	0	0	0
cluster10815_2rr.inclade1.ortho1.tre	ME8	ME6	FALSE	FALSE	18.619	6.95304	11.666	-4.71295	35.4839	11.845	23.6389	-11.794	0.47684	-0.00847184	-0.00537424	CSPL1_IPONI	CASP-like protein IN26 (CASP-like protein 1D1) (InCASPL1D1) (Fragment)		integral component of membrane [GO:0016021]; plasma membrane [GO:0005886]		FALSE	FALSE	0	HUMMINGBIRD	0	HUMMINGBIRD
cluster10818_1rr.inclade1.ortho1.tre	ME7	ME7	TRUE	FALSE	65.4823	30.6105	34.8718	-4.26135	75.3441	33.1301	42.214	-9.08388	0.12575	0.160742	-0.0269156	DNJ49_ARATH	Chaperone protein dnaJ 49 (AtDjC49) (AtJ49)		integral component of membrane [GO:0016021]		FALSE	FALSE	0	0	0	0
cluster10820_1rr.inclade1.ortho2.tre	ME23	ME12	FALSE	FALSE	7.26834	1.3509	5.91743	-4.56653	20.8461	7.36722	13.4788	-6.11162	0.34334	0.00337977	0.0404504	MTEFH_ARATH	Transcription termination factor MTEF18, mitochondrial (Mitochondrial transcription termination factor 18) (Protein SUPPRESSOR OF HOT1-4 1)	chloroplast organization [GO:0009658]; developmental process [GO:0032502]; DNA-templated transcription, termination [GO:0006353]; mitochondrion organization [GO:0007005]; regulation of transcription, DNA-templated [GO:0006355]; ribosome assembly [GO:0042255]; RNA splicing [GO:0008380]	chloroplast [GO:0009507]; mitochondrion [GO:0005739]	double-stranded DNA binding [GO:0003690]; rRNA binding [GO:0019843]; single-stranded RNA binding [GO:0003727]	FALSE	FALSE	BUTTERFLY	BUTTERFLY	BUTTERFLY	BUTTERFLY
cluster10822_1rr.inclade1.ortho2.tre	ME38	ME1	FALSE	TRUE	2.52192	0.50599	2.01593	-1.50994	18.3698	8.00177	10.3681	-2.36629	0.40248	0.00209931	-0.0408766	NA	NA	NA	NA	NA	TRUE	FALSE	0	0	0	0
cluster10824_1rr.inclade1.ortho2.tre	ME2	ME42	FALSE	FALSE	19.2107	13.7164	5.49437	8.22201	5.01557	0.485387	4.53018	-4.04479	0.33978	-0.0611838	-0.0655523	DRE2C_ARATH	Dehydration-responsive element-binding protein 2C (Protein DREB2C)	abscisic acid-activated signaling pathway [GO:0009738]; heat acclimation [GO:0010286]; positive regulation of transcription, DNA-templated [GO:0045893]; response to abscisic acid [GO:0009737]; transcription, DNA-templated [GO:0006351]	nucleus [GO:0005634]	DNA-binding transcription factor activity [GO:0003700]; sequence-specific DNA binding [GO:0043565]; transcription regulatory region DNA binding [GO:0044212]	FALSE	FALSE	0	0	0	0
cluster10825_1rr.inclade1.ortho4.tre	ME10	ME3	FALSE	FALSE	7.80434	1.89451	5.90983	-4.01532	19.0644	8.90623	10.1582	-1.25195	0.20811	0.0347129	0.00243472	NIC1_ARATH	Nicotinamidase 1 (AtNIC1) (EC 3.5.1.19) (Nicotinamide deamidase 1)	nicotinamide metabolic process [GO:0006769]; pyridine nucleotide salvage [GO:0019365]; response to abscisic acid [GO:0009737]	cytoplasm [GO:0005737]	nicotinamidase activity [GO:0008936]	FALSE	FALSE	0	0	0	BUTTERFLY
cluster10826_1rr.inclade1.ortho3.tre	ME20	ME37	FALSE	FALSE	10.2872	2.67832	7.60891	-4.93059	20.9252	2.10901	18.8162	-16.7071	0.23591	0.0168449	-0.0301839	NA	NA	NA	NA	NA	FALSE	FALSE	HUMMINGBIRD	0	HUMMINGBIRD	0
cluster10827_1rr.inclade1.ortho1.tre	ME42	ME1	FALSE	FALSE	10.2118	1.33248	8.87931	-7.54683	17.8438	11.6346	6.20921	5.42537	0.43105	-0.00215494	0.02394	HIP35_ARATH	Heavy metal-associated isoprenylated plant protein 35 (AtHIP35)	cellular transition metal ion homeostasis [GO:0046916]; metal ion transport [GO:0030001]	cytoplasm [GO:0005737]	transition metal ion binding [GO:0046914]	FALSE	FALSE	HUMMINGBIRD	0	HUMMINGBIRD	0
cluster10828_2rr.inclade1.ortho3.tre	ME1	ME44	FALSE	FALSE	9.98689	4.16654	5.82036	-1.65382	28.7533	7.88994	20.8634	-12.9734	0.65608	0.0118267	0.00252542	NA	NA	NA	NA	NA	FALSE	FALSE	0	0	0	0
cluster10829_1rr.inclade1.ortho2.tre	ME9	ME4	FALSE	FALSE	18.9888	8.22249	10.7663	-2.54382	33.8721	13.5704	20.3018	-6.7314	0.24093	0.00590061	-0.0480333	CSPL8_ARATH	CASP-like protein 4A3 (AtCASPL4A3)	oxidation-reduction process [GO:0055114]	integral component of membrane [GO:0016021]; plasma membrane [GO:0005886]	iron-sulfur cluster binding [GO:0051536]	FALSE	FALSE	HUMMINGBIRD	0	HUMMINGBIRD	0
cluster1083_1rr.inclade1.ortho5.tre	ME0	ME2	FALSE	FALSE	4.27917	0.888671	3.3905	-2.50183	15.7054	10.9216	4.78378	6.13785	0.28396	-0.0769231	0.00344593	FB219_ARATH	F-box protein At4g02760				FALSE	FALSE	0	0	0	BEE
cluster10830_2rr.inclade1.ortho2.tre	ME12	ME21	FALSE	FALSE	7.10541	2.62476	4.48065	-1.85589	10.0262	1.17892	8.84727	-7.66835	0.25595	0.0501757	-0.132164	GAUTB_ARATH	Probable galacturonosyltransferase 11 (EC 2.4.1.-)	cell wall organization [GO:0071555]; mucilage biosynthetic process [GO:0010192]; pectin biosynthetic process [GO:0045489]	Golgi apparatus [GO:0005794]; Golgi membrane [GO:0000139]; integral component of membrane [GO:0016021]	polygalacturonate 4-alpha-galacturonosyltransferase activity [GO:0047262]	FALSE	FALSE	0	HUMMINGBIRD	0	HUMMINGBIRD
cluster10831_1rr.inclade1.ortho1.tre	ME4	ME13	FALSE	FALSE	28.8867	9.53936	19.3473	-9.80798	56.8186	28.0854	28.7333	-0.647937	0.26632	0.133579	0.119188	Y5600_ARATH	BTB/POZ domain-containing protein At5g60050	protein ubiquitination [GO:0016567]			FALSE	FALSE	0	BUTTERFLY	0	BUTTERFLY
cluster10832_1rr.inclade1.ortho2.tre	ME0	ME4	FALSE	FALSE	13.6877	2.47693	11.2107	-8.73382	12.7359	3.43463	9.30124	-5.86661	0.59084	0.0126592	-0.0127731	IOJAM_ARATH	Protein Iojap-related, mitochondrial (Synonyms)	negative regulation of ribosome biogenesis [GO:0090071]; negative regulation of translation [GO:0017148]	mitochondrion [GO:0005739]	ribosomal large subunit binding [GO:0043023]	FALSE	FALSE	0	0	0	0
cluster10834_1rr.inclade1.ortho1.tre	ME56	ME13	FALSE	FALSE	10.3317	0.69369	9.63801	-8.94432	29.2155	13.3454	15.8701	-2.52477	0.15848	0.044588	0.0667537	DAAA_ARATH	D-amino-acid transaminase, chloroplastic (EC 2.6.1.21) (EC 4.1.3.38) (Aminodeoxychorismate lyase) (AtADCL) (Branched-chain-amino-acid aminotransferase-like protein 3)	para-aminobenzoic acid biosynthetic process [GO:0008153]; tetrahydrofolate biosynthetic process [GO:0046654]	chloroplast [GO:0009507]; chloroplast stroma [GO:0009570]	4-amino-4-deoxychorismate lyase activity [GO:0008696]; D-alanine:2-oxoglutarate aminotransferase activity [GO:0047810]	FALSE	FALSE	0	BUTTERFLY	0	BUTTERFLY
cluster10836_1rr.inclade1.ortho1.tre	ME24	ME16	FALSE	FALSE	29.8675	8.47595	21.3916	-12.9157	21.8011	4.90638	16.8948	-11.9884	0.09318	-0.0106332	0.00102478	RK27_TOBAC	50S ribosomal protein L27, chloroplastic (CL27)	translation [GO:0006412]	chloroplast [GO:0009507]; ribosome [GO:0005840]	structural constituent of ribosome [GO:0003735]	FALSE	FALSE	0	0	0	0
cluster10837_1rr.inclade1.ortho1.tre	ME7	ME18	FALSE	FALSE	16.6737	5.07925	11.5944	-6.51519	36.6706	7.20936	29.4612	-22.2519	0.36875	0.0919917	0.0806112	MYOB7_ARATH	Myosin-binding protein 7		integral component of membrane [GO:0016021]; transport vesicle [GO:0030133]	myosin binding [GO:0017022]	FALSE	FALSE	0	HUMMINGBIRD	0	HUMMINGBIRD
cluster10838_1rr.inclade1.ortho1.tre	ME10	ME7	FALSE	FALSE	5.14274	0.989736	4.153	-3.16327	10.709	3.05433	7.65463	-4.6003	0.28473	0.11361	0.034107	M3K17_ARATH	Mitogen-activated protein kinase kinase kinase 17 (EC 2.7.11.25)	abscisic acid-activated signaling pathway [GO:0009738]; activation of protein kinase activity [GO:0032147]; regulation of mitotic cell cycle [GO:0007346]; response to abscisic acid [GO:0009737]; response to osmotic stress [GO:0006970]; signal transduction by protein phosphorylation [GO:0023014]; stress-activated protein kinase signaling cascade [GO:0031098]	cytoplasm [GO:0005737]; nucleus [GO:0005634]	ATP binding [GO:0005524]; MAP kinase kinase kinase activity [GO:0004709]; protein serine/threonine kinase activity [GO:0004674]	FALSE	FALSE	0	0	0	0
cluster10838_1rr.inclade2.ortho1.tre	ME7	ME1	FALSE	FALSE	5.48431	1.45279	4.03152	-2.57873	7.43703	3.46775	3.96929	-0.501537	0.27282	0.0521934	-0.0739617	M3K17_ARATH	Mitogen-activated protein kinase kinase kinase 17 (EC 2.7.11.25)	abscisic acid-activated signaling pathway [GO:0009738]; activation of protein kinase activity [GO:0032147]; regulation of mitotic cell cycle [GO:0007346]; response to abscisic acid [GO:0009737]; response to osmotic stress [GO:0006970]; signal transduction by protein phosphorylation [GO:0023014]; stress-activated protein kinase signaling cascade [GO:0031098]	cytoplasm [GO:0005737]; nucleus [GO:0005634]	ATP binding [GO:0005524]; MAP kinase kinase kinase activity [GO:0004709]; protein serine/threonine kinase activity [GO:0004674]	FALSE	FALSE	0	0	0	0
cluster10839_1rr.inclade1.ortho3.tre	ME4	ME3	FALSE	FALSE	49.7975	16.7803	33.0171	-16.2368	18.6165	9.66807	8.9484	0.719671	0.24848	0.0634325	0.00459488	WAKLO_ARATH	Wall-associated receptor kinase-like 14 (EC 2.7.11.-)	cell surface receptor signaling pathway [GO:0007166]	integral component of membrane [GO:0016021]; plasma membrane [GO:0005886]	ATP binding [GO:0005524]; protein serine/threonine kinase activity [GO:0004674]	FALSE	FALSE	0	0	0	BUTTERFLY
cluster10842_1rr.inclade1.ortho4.tre	ME10	ME3	FALSE	TRUE	51.3706	16.1042	35.2664	-19.1622	32.7556	15.2055	17.5501	-2.34458	0.26885	0.0853817	0.0548981	3AT1_ARATH	Coumaroyl-CoA:anthocyanidin 3-O-glucoside-6''-O-coumaroyltransferase 1 (EC 2.3.1.-)			transferase activity, transferring acyl groups other than amino-acyl groups [GO:0016747]	FALSE	FALSE	0	0	0	BUTTERFLY
cluster10845_1rr.inclade1.ortho1.tre	ME13	ME11	FALSE	FALSE	7.75408	2.33335	5.42073	-3.08738	11.8351	5.14162	6.69352	-1.5519	0.27478	-0.028787	0.000381148	NA	NA	NA	NA	NA	FALSE	FALSE	HUMMINGBIRD	HUMMINGBIRD	HUMMINGBIRD	HUMMINGBIRD
cluster10846_1rr.inclade1.ortho4.tre	ME0	ME21	FALSE	FALSE	1.53157	0.343286	1.18829	-0.844999	2.96675	0.272391	2.69436	-2.42197	0.26313	0.00312151	0.0322183	NA	NA	NA	NA	NA	TRUE	TRUE	0	HUMMINGBIRD	0	HUMMINGBIRD
cluster10847_1rr.inclade1.ortho1.tre	ME10	ME13	FALSE	TRUE	59.0339	21.7512	37.2827	-15.5315	34.7353	8.51182	26.2234	-17.7116	0.14943	0.0953531	0.0376971	NA	NA	NA	NA	NA	FALSE	FALSE	0	BUTTERFLY	0	BUTTERFLY
cluster10848_1rr.inclade1.ortho3.tre	ME14	ME11	FALSE	FALSE	4.88231	1.19668	3.68564	-2.48896	5.03498	1.41754	3.61744	-2.1999	0.42228	0.0242705	0.014069	NA	NA	NA	NA	NA	FALSE	FALSE	HUMMINGBIRD	HUMMINGBIRD	HUMMINGBIRD	HUMMINGBIRD
cluster10850_1rr.inclade1.ortho3.tre	ME3	ME2	FALSE	FALSE	25.0388	10.0597	14.9791	-4.91949	51.0142	40.7809	10.2333	30.5476	0.48378	-0.00477031	-0.0353522	NA	NA	NA	NA	NA	FALSE	FALSE	0	0	BEE	BEE
cluster10851_1rr.inclade1.ortho1.tre	ME0	ME7	FALSE	FALSE	1.41426	0.316488	1.09777	-0.781286	4.88656	1.6112	3.27537	-1.66417	0.17728	0.0126134	0.0882628	NA	NA	NA	NA	NA	TRUE	FALSE	0	0	0	0
cluster10852_1rr.inclade1.ortho1.tre	ME31	ME1	FALSE	FALSE	58.0922	9.54097	48.5512	-39.0103	60.3159	45.2179	15.098	30.1198	0.12089	-0.14984	0.00807562	ACL5_ARATH	Thermospermine synthase ACAULIS5 (EC 2.5.1.79)	auxin polar transport [GO:0009926]; phloem or xylem histogenesis [GO:0010087]; polyamine biosynthetic process [GO:0006596]; xylem vessel member cell differentiation [GO:0048759]	cytoplasm [GO:0005737]	spermine synthase activity [GO:0016768]; thermospermine synthase activity [GO:0010487]	FALSE	FALSE	0	0	0	0
cluster10854_1rr.inclade1.ortho1.tre	ME5	ME7	FALSE	FALSE	46.1508	11.2048	34.946	-23.7412	60.9209	27.1628	33.7581	-6.5953	0.30987	0.126559	0.0589506	PP444_ARATH	Pentatricopeptide repeat-containing protein At5g64320, mitochondrial	mitochondrial translation [GO:0032543]; RNA modification [GO:0009451]	mitochondrion [GO:0005739]	endonuclease activity [GO:0004519]; RNA binding [GO:0003723]	FALSE	FALSE	HUMMINGBIRD	0	HUMMINGBIRD	0
cluster10855_1rr.inclade1.ortho1.tre	ME12	ME0	FALSE	FALSE	10.3253	3.50156	6.82373	-3.32217	3.43182	0.59712	2.8347	-2.23758	0.45864	0.0132465	0.0125192	CHUP1_ARATH	Protein CHUP1, chloroplastic (Protein CHLOROPLAST UNUSUAL POSITIONING 1)	chloroplast relocation [GO:0009902]	chloroplast [GO:0009507]; chloroplast outer membrane [GO:0009707]		FALSE	TRUE	0	0	0	0
cluster10856_1rr.inclade1.ortho3.tre	ME15	ME3	FALSE	FALSE	22.324	5.96337	16.3606	-10.3972	55.4726	24.8233	30.6493	-5.826	0.2542	0.0457344	0.112571	Y5656_ARATH	BTB/POZ domain-containing protein At5g66560	protein ubiquitination [GO:0016567]	plasma membrane [GO:0005886]		FALSE	FALSE	0	0	0	BUTTERFLY
cluster10857_1rr.inclade1.ortho2.tre	ME14	ME6	FALSE	FALSE	32.388	9.6103	22.7777	-13.1674	66.2116	38.0476	28.164	9.88356	0.22575	-0.000893653	-0.00302398	PLT5_ARATH	Polyol transporter 5 (Protein POLYOL TRANSPORTER 5) (AtPLT5) (Sugar-proton symporter PLT5)	glucose import [GO:0046323]; lateral root formation [GO:0010311]	integral component of membrane [GO:0016021]; plasma membrane [GO:0005886]	carbohydrate:proton symporter activity [GO:0005351]; D-ribose transmembrane transporter activity [GO:0015591]; D-xylose transmembrane transporter activity [GO:0015148]; galactose transmembrane transporter activity [GO:0005354]; glucose transmembrane transporter activity [GO:0005355]; glycerol transmembrane transporter activity [GO:0015168]; mannitol transmembrane transporter activity [GO:0015575]…	FALSE	FALSE	HUMMINGBIRD	HUMMINGBIRD	HUMMINGBIRD	HUMMINGBIRD
cluster10859_1rr.inclade1.ortho2.tre	ME11	ME4	FALSE	FALSE	14.2135	5.17337	9.04012	-3.86675	12.4879	3.02802	9.45989	-6.43187	0.14616	0.0643855	0.0705687	PTR6_ARATH	Protein NRT1/ PTR FAMILY 1.2 (AtNPF1.2) (Nitrate transporter 1.11)	nitrate transport [GO:0015706]	integral component of membrane [GO:0016021]; plasma membrane [GO:0005886]	low-affinity nitrate transmembrane transporter activity [GO:0080054]	FALSE	FALSE	0	0	0	0
cluster1086_1rr.inclade1.ortho5.tre	ME0	ME56	FALSE	FALSE	1.48119	0.332115	1.14908	-0.816961	7.83885	1.47033	6.36852	-4.89819	0.07215	-0.0825242	-0.044961	ASNA1_CHLRE	ATPase ARSA1 (Cr-ArsA1) (EC 3.6.-.-) (Arsenical pump-driving ATPase homolog 1) (Arsenite-stimulated ATPase homolog 1) (Protein ANTENNA SIZE MUTANT 1)		cytosol [GO:0005829]	ATPase activity [GO:0016887]; ATP binding [GO:0005524]	TRUE	FALSE	0	0	0	0
cluster10860_1rr.inclade1.ortho2.tre	ME35	ME1	FALSE	TRUE	5.65975	0.975107	4.68465	-3.70954	23.0739	12.7776	10.2963	2.48137	0.39459	-0.0242574	-0.0781337	DI195_ORYSJ	Protein DEHYDRATION-INDUCED 19 homolog 5 (OsDi19-5)				FALSE	FALSE	0	0	0	0
cluster10861_1rr.inclade1.ortho4.tre	ME0	ME19	FALSE	FALSE	3.45025	0.725486	2.72477	-1.99928	11.8138	2.48065	9.33312	-6.85246	0.27527	0.0312089	-0.0331555	NAC56_ARATH	NAC transcription factor 56 (AtNAC056) (NAC domain-containing protein 2) (AtNAC2) (Protein NAC-REGULATED SEED MORPHOLOGY 1)	integument development [GO:0080060]; regulation of embryonic development [GO:0045995]; response to jasmonic acid [GO:0009753]; seed morphogenesis [GO:0048317]; transcription, DNA-templated [GO:0006351]	nucleus [GO:0005634]	DNA-binding transcription factor activity [GO:0003700]; transcription regulatory region DNA binding [GO:0044212]	FALSE	FALSE	0	0	0	0
cluster10863_1rr.inclade1.ortho1.tre	ME0	ME13	FALSE	FALSE	4.79129	1.38343	3.40785	-2.02442	10.0546	4.01636	6.03825	-2.02189	0.05682	0.0358987	0.0871209	VP282_ARATH	Vacuolar protein sorting-associated protein 28 homolog 2	protein transport to vacuole involved in ubiquitin-dependent protein catabolic process via the multivesicular body sorting pathway [GO:0043328]	ESCRT I complex [GO:0000813]		FALSE	FALSE	0	BUTTERFLY	0	BUTTERFLY
cluster10865_1rr.inclade1.ortho1.tre	ME0	ME59	FALSE	FALSE	8.50223	2.5476	5.95463	-3.40703	16.3952	2.80947	13.5857	-10.7763	0.36364	-0.0724989	-0.0062604	NA	NA	NA	NA	NA	FALSE	FALSE	0	0	0	0
cluster10867_1rr.inclade1.ortho1.tre	ME37	ME5	TRUE	FALSE	15.6241	4.31587	11.3082	-6.99233	35.5906	18.2985	17.2921	1.00636	0.30045	-0.022366	0.0413134	RS16B_ARATH	30S ribosomal protein S16-2, chloroplastic/mitochondrial	mitochondrial translation [GO:0032543]	chloroplast [GO:0009507]; mitochondrion [GO:0005739]; plastid [GO:0009536]; small ribosomal subunit [GO:0015935]	structural constituent of ribosome [GO:0003735]	FALSE	FALSE	BUTTERFLY	BEE	BUTTERFLY	BEE
cluster10867_1rr.inclade1.ortho2.tre	ME29	ME47	FALSE	FALSE	29.5999	4.06254	25.5373	-21.4748	11.8831	1.46968	10.4134	-8.94375	0.19128	0.118662	0.00946678	RS16B_ARATH	30S ribosomal protein S16-2, chloroplastic/mitochondrial	mitochondrial translation [GO:0032543]	chloroplast [GO:0009507]; mitochondrion [GO:0005739]; plastid [GO:0009536]; small ribosomal subunit [GO:0015935]	structural constituent of ribosome [GO:0003735]	FALSE	FALSE	0	0	HUMMINGBIRD	0
cluster10868_1rr.inclade1.ortho2.tre	ME7	ME20	FALSE	FALSE	13.4155	3.02766	10.3879	-7.36023	13.3941	2.06499	11.3291	-9.26408	0.09494	0.10124	0.076838	NA	NA	NA	NA	NA	FALSE	FALSE	0	0	0	0
cluster10869_1rr.inclade1.ortho1.tre	ME3	ME2	TRUE	FALSE	45.7526	32.9175	12.8351	20.0823	65.8069	55.2572	10.5496	44.7076	0.26591	-0.0470733	-0.0150253	NA	NA	NA	NA	NA	FALSE	FALSE	0	0	BEE	BEE
cluster10869_1rr.inclade1.ortho2.tre	ME9	ME4	FALSE	FALSE	36.7392	12.6213	24.1179	-11.4967	92.9048	41.6932	51.2116	-9.51838	0.14014	0.0533798	0.0906952	NA	NA	NA	NA	NA	FALSE	FALSE	HUMMINGBIRD	0	HUMMINGBIRD	0
cluster10870_1rr.inclade1.ortho4.tre	ME4	ME6	FALSE	FALSE	12.4698	2.45419	10.0156	-7.56144	20.9052	6.02542	14.8798	-8.8544	0.34244	0.104556	0.0133044	LOR7_ARATH	Protein LURP-one-related 7		plasma membrane [GO:0005886]		FALSE	FALSE	0	HUMMINGBIRD	0	HUMMINGBIRD
cluster10871_1rr.inclade1.ortho5.tre	ME0	ME19	FALSE	FALSE	4.83252	1.24277	3.58975	-2.34697	6.75874	1.51201	5.24673	-3.73473	0.31102	-0.0237608	-0.0141965	NA	NA	NA	NA	NA	FALSE	FALSE	0	0	0	0
cluster10872_1rr.inclade1.ortho1.tre	ME11	ME4	FALSE	FALSE	29.7066	7.79013	21.9165	-14.1264	28.6721	12.2045	16.4676	-4.26307	0.1674	0.0514803	0.0839904	FHY3_ARATH	Protein FAR-RED ELONGATED HYPOCOTYL 3	circadian rhythm [GO:0007623]; far-ME6 light signaling pathway [GO:0010018]; positive regulation of circadian rhythm [GO:0042753]; positive regulation of transcription, DNA-templated [GO:0045893]; ME6, far-ME6 light phototransduction [GO:0009585]; ME6 or far-ME6 light signaling pathway [GO:0010017]; response to far ME6 light [GO:0010218]; transcription, DNA-templated [GO:0006351]	nucleus [GO:0005634]	DNA-binding transcription factor activity [GO:0003700]; zinc ion binding [GO:0008270]	FALSE	FALSE	0	0	0	0
cluster10874_1rr.inclade1.ortho2.tre	ME5	ME14	FALSE	TRUE	21.9982	12.0743	9.92388	2.1504	13.6777	6.29434	7.38331	-1.08897	0.2078	0.00958469	-0.0156546	P2C49_ARATH	Probable protein phosphatase 2C 49 (AtPP2C49) (EC 3.1.3.16)			metal ion binding [GO:0046872]; protein serine/threonine phosphatase activity [GO:0004722]	FALSE	FALSE	HUMMINGBIRD	HUMMINGBIRD	HUMMINGBIRD	HUMMINGBIRD
cluster10875_1rr.inclade1.ortho2.tre	ME1	ME11	FALSE	FALSE	6.79626	3.95068	2.84557	1.10511	12.9911	2.91486	10.0763	-7.16142	0.23041	-0.00684117	0.0273303	NA	NA	NA	NA	NA	FALSE	FALSE	0	HUMMINGBIRD	0	HUMMINGBIRD
cluster1088_1rr.inclade1.ortho5.tre	ME0	ME0	FALSE	FALSE	5.42883	0.538194	4.89064	-4.35245	9.59985	0.807599	8.79225	-7.98465	0.27308	0.0448774	0.0136479	FTSHC_ARATH	ATP-dependent zinc metalloprotease FTSH 12, chloroplastic (AtFTSH12) (EC 3.4.24.-)		chloroplast [GO:0009507]; chloroplast envelope [GO:0009941]; chloroplast thylakoid membrane [GO:0009535]; integral component of membrane [GO:0016021]; mitochondrion [GO:0005739]; plastid [GO:0009536]	ATP binding [GO:0005524]; ATP-dependent peptidase activity [GO:0004176]; metal ion binding [GO:0046872]; metalloendopeptidase activity [GO:0004222]	FALSE	FALSE	0	0	0	0
cluster10881_1rr.inclade1.ortho1.tre	ME12	ME15	FALSE	FALSE	16.4621	2.38676	14.0753	-11.6885	13.9718	5.71595	8.25587	-2.53992	0.23448	0.0270951	-0.0193859	NA	NA	NA	NA	NA	FALSE	FALSE	0	0	0	0
cluster10882_1rr.inclade1.ortho1.tre	ME1	ME48	FALSE	FALSE	13.0674	4.61337	8.45399	-3.84061	30.2275	3.00916	27.2184	-24.2092	0.38706	-0.00267166	0.00512912	U74E2_ARATH	UDP-glycosyltransferase 74E2 (EC 2.4.1.-)	cellular hyperosmotic salinity response [GO:0071475]; cellular response to abscisic acid stimulus [GO:0071215]; cellular response to hydrogen peroxide [GO:0070301]; cellular response to water deprivation [GO:0042631]; indolebutyric acid metabolic process [GO:0080024]; response to karrikin [GO:0080167]; shoot system morphogenesis [GO:0010016]	intracellular membrane-bounded organelle [GO:0043231]	indole-3-butyrate beta-glucosyltransferase activity [GO:0052638]; quercetin 3-O-glucosyltransferase activity [GO:0080043]; quercetin 7-O-glucosyltransferase activity [GO:0080044]; UDP-glucosyltransferase activity [GO:0035251]	FALSE	FALSE	0	HUMMINGBIRD	0	HUMMINGBIRD
cluster10885_1rr.inclade1.ortho1.tre	ME13	ME4	FALSE	FALSE	28.5734	3.41369	25.1597	-21.746	31.733	15.8395	15.8936	-0.0541018	0.26394	0.0367035	0.0452872	EIN3_ARATH	Protein ETHYLENE INSENSITIVE 3	cellular response to iron ion [GO:0071281]; defense response to bacterium [GO:0042742]; ethylene-activated signaling pathway [GO:0009873]; regulation of transcription, DNA-templated [GO:0006355]; response to ethylene [GO:0009723]; response to hypoxia [GO:0001666]; sugar mediated signaling pathway [GO:0010182]; transcription, DNA-templated [GO:0006351]	nucleus [GO:0005634]	DNA-binding transcription factor activity [GO:0003700]; transcription regulatory region DNA binding [GO:0044212]; transcription regulatory region sequence-specific DNA binding [GO:0000976]	FALSE	FALSE	HUMMINGBIRD	0	HUMMINGBIRD	0
cluster10886_1rr.inclade1.ortho1.tre	ME2	ME1	FALSE	FALSE	4.44935	1.74158	2.70776	-0.966179	9.82669	5.0128	4.81389	0.198914	0.40192	-0.0277166	-0.0064208	NDA8B_ARATH	NADH dehydrogenase [ubiquinone] 1 alpha subcomplex subunit 8-B	oxidation-reduction process [GO:0055114]	mitochondrial intermembrane space [GO:0005758]; mitochondrial respiratory chain complex I [GO:0005747]; mitochondrion [GO:0005739]		FALSE	FALSE	0	0	0	0
cluster10887_1rr.inclade1.ortho4.tre	ME0	ME0	FALSE	FALSE	2.91232	0.995976	1.91634	-0.920364	1.3716	0.248181	1.12342	-0.875238	0.32532	0.0484123	0.0204842	SNP33_ARATH	SNAP25 homologous protein SNAP33 (AtSNAP33) (Snap25a) (Synaptosomal-associated protein SNAP25-like 1) (SNAP-25-like protein 1)	cytokinesis by cell plate formation [GO:0000911]; membrane fusion [GO:0061025]; protein transport [GO:0015031]; response to abscisic acid [GO:0009737]; response to mechanical stimulus [GO:0009612]; response to other organism [GO:0051707]; vesicle-mediated transport [GO:0016192]	cell plate [GO:0009504]; chloroplast [GO:0009507]; integral component of membrane [GO:0016021]; plasma membrane [GO:0005886]	SNAP receptor activity [GO:0005484]	FALSE	TRUE	0	0	0	0
cluster10888_1rr.inclade1.ortho2.tre	ME1	ME46	FALSE	TRUE	16.9778	9.57619	7.40162	2.17457	33.5266	8.04954	25.477	-17.4275	0.66235	-0.0529647	-0.00339556	NA	NA	NA	NA	NA	FALSE	FALSE	0	HUMMINGBIRD	0	HUMMINGBIRD
cluster10889_1rr.inclade1.ortho2.tre	ME8	ME38	FALSE	FALSE	22.2722	8.89885	13.3734	-4.47454	21.9913	2.84286	19.1485	-16.3056	0.3048	-0.0886979	0.0440907	PP166_ARATH	Pentatricopeptide repeat-containing protein At2g20710, mitochondrial	RNA modification [GO:0009451]	intracellular membrane-bounded organelle [GO:0043231]; mitochondrion [GO:0005739]	endonuclease activity [GO:0004519]; RNA binding [GO:0003723]	FALSE	FALSE	0	0	0	BUTTERFLY
cluster1089_1rr.inclade1.ortho6.tre	ME11	ME6	FALSE	FALSE	8.49722	1.05465	7.44257	-6.38792	13.6086	2.56594	11.0427	-8.47676	0.26825	0.0669418	-0.0165379	NA	NA	NA	NA	NA	FALSE	FALSE	0	HUMMINGBIRD	0	HUMMINGBIRD
cluster1089_1rr.inclade2.ortho2.tre	ME0	ME24	FALSE	FALSE	1.75946	0.489009	1.27045	-0.781444	11.5553	2.07308	9.4822	-7.40911	0.35841	-0.0311031	-0.0447	NA	NA	NA	NA	NA	TRUE	FALSE	0	HUMMINGBIRD	0	HUMMINGBIRD
cluster10892_1rr.inclade1.ortho4.tre	ME8	ME3	TRUE	TRUE	46.3273	24.8774	21.4499	3.42751	3.64552	1.25017	2.39535	-1.14518	0.44228	-0.0495063	0.0231011	WRK11_ARATH	Probable WRKY transcription factor 11 (WRKY DNA-binding protein 11)	defense response to bacterium [GO:0042742]; response to chitin [GO:0010200]; transcription, DNA-templated [GO:0006351]	nucleus [GO:0005634]	calmodulin binding [GO:0005516]; DNA-binding transcription factor activity [GO:0003700]; sequence-specific DNA binding [GO:0043565]	FALSE	TRUE	0	0	0	BUTTERFLY
cluster10893_1rr.inclade1.ortho3.tre	ME1	ME9	TRUE	FALSE	60.1189	43.7388	16.3801	27.3588	75.0225	19.9961	55.0264	-35.0303	0.29016	-0.0360084	-0.0269973	RNP1_ARATH	Heterogeneous nuclear ribonucleoprotein 1 (hnRNP1)	mRNA processing [GO:0006397]; mRNA transport [GO:0051028]; regulation of response to salt stress [GO:1901000]; regulation of response to water deprivation [GO:2000070]; RNA splicing [GO:0008380]; vegetative to reproductive phase transition of meristem [GO:0010228]	cytosol [GO:0005829]; nucleus [GO:0005634]; spliceosomal complex [GO:0005681]	mRNA binding [GO:0003729]	FALSE	FALSE	0	0	0	0
cluster10894_1rr.inclade1.ortho2.tre	ME11	ME4	FALSE	FALSE	31.8828	11.8994	19.9834	-8.084	56.1332	33.4729	22.6603	10.8125	0.13572	0.0991447	0.00143038	CESA8_ARATH	Cellulose synthase A catalytic subunit 8 [UDP-forming] (AtCesA8) (EC 2.4.1.12) (Protein IRREGULAR XYLEM 1) (AtIRX1) (Protein LEAF WILTING 2)	cellulose biosynthetic process [GO:0030244]; cell wall organization [GO:0071555]; defense response to bacterium [GO:0042742]; defense response to fungus [GO:0050832]; plant-type primary cell wall biogenesis [GO:0009833]; plant-type secondary cell wall biogenesis [GO:0009834]; response to osmotic stress [GO:0006970]; response to water deprivation [GO:0009414]	cell wall [GO:0005618]; Golgi apparatus [GO:0005794]; integral component of membrane [GO:0016021]; plasma membrane [GO:0005886]	cellulose synthase (UDP-forming) activity [GO:0016760]; metal ion binding [GO:0046872]	FALSE	FALSE	0	0	0	0
cluster10895_1rr.inclade1.ortho2.tre	ME63	ME46	FALSE	FALSE	7.25322	1.75158	5.50164	-3.75005	4.29291	0.638184	3.65473	-3.01654	0.37619	-0.0926878	-0.0176342	FB140_ARATH	F-box protein At3g12350				FALSE	TRUE	0	HUMMINGBIRD	0	HUMMINGBIRD
cluster10898_1rr.inclade1.ortho4.tre	ME26	ME48	FALSE	FALSE	18.2855	5.25385	13.0317	-7.77782	72.6531	10.7084	61.9447	-51.2363	0.352	-0.0738981	-0.0378452	RTNLB_ARATH	Reticulon-like protein B2 (AtRTNLB2) (VirB2-interacting protein 2)	endoplasmic reticulum tubular network organization [GO:0071786]	endoplasmic reticulum [GO:0005783]; endoplasmic reticulum membrane [GO:0005789]; endoplasmic reticulum tubular network [GO:0071782]; Golgi apparatus [GO:0005794]; integral component of cytoplasmic side of endoplasmic reticulum membrane [GO:0071458]; plasma membrane [GO:0005886]		FALSE	FALSE	HUMMINGBIRD	HUMMINGBIRD	HUMMINGBIRD	HUMMINGBIRD
cluster10899_1rr.inclade1.ortho1.tre	ME46	ME20	FALSE	FALSE	25.0214	3.41218	21.6092	-18.1971	20.9711	3.39426	17.5769	-14.1826	0.32934	-0.101979	-0.0259842	HTR12_ARATH	Histone H3-like centromeric protein HTR12 (Centromeric histone CENH3)	cell division [GO:0051301]; centromere complex assembly [GO:0034508]; double fertilization forming a zygote and endosperm [GO:0009567]; meiotic cell cycle [GO:0051321]; meiotic chromosome separation [GO:0051307]; nucleosome assembly [GO:0006334]	chromatin [GO:0000785]; chromosome, centromeric region [GO:0000775]; condensed chromosome kinetochore [GO:0000777]; nucleosome [GO:0000786]; nucleus [GO:0005634]	nucleosomal DNA binding [GO:0031492]; protein heterodimerization activity [GO:0046982]	FALSE	FALSE	0	0	0	0
cluster109_1rr.inclade4.ortho3.tre	ME21	ME2	FALSE	FALSE	7.9773	1.63262	6.34468	-4.71206	17.2617	11.84	5.42166	6.41834	0.21671	-0.0857574	0.021693	YSL2_ARATH	Metal-nicotianamine transporter YSL2 (Protein YELLOW STRIPE LIKE 2) (AtYSL2)	ion transport [GO:0006811]; iron ion homeostasis [GO:0055072]; response to iron ion [GO:0010039]; response to zinc ion [GO:0010043]; seed development [GO:0048316]	integral component of membrane [GO:0016021]; plasma membrane [GO:0005886]	iron-nicotianamine transmembrane transporter activity [GO:0051980]	FALSE	FALSE	BEE	0	BEE	BEE
cluster1090_1rr.inclade2.ortho5.tre	ME53	ME53	FALSE	FALSE	8.7737	1.41384	7.35986	-5.94603	25.8433	6.38739	19.4559	-13.0685	0.14882	-0.0367968	-0.0941752	MAIL2_ARATH	Protein MAIN-LIKE 2		nucleus [GO:0005634]	transaminase activity [GO:0008483]	FALSE	FALSE	BUTTERFLY	BUTTERFLY	BUTTERFLY	BUTTERFLY
cluster10900_1rr.inclade1.ortho1.tre	ME51	ME13	FALSE	TRUE	16.5938	1.73659	14.8572	-13.1206	12.8806	3.76388	9.11672	-5.35284	0.03421	0.089947	0.0676178	CCMH_ORYSI	Cytochrome c-type biogenesis CcmH-like mitochondrial protein (OsCCMH)	cytochrome complex assembly [GO:0017004]	integral component of membrane [GO:0016021]; mitochondrial inner membrane [GO:0005743]	metal ion binding [GO:0046872]	FALSE	FALSE	0	BUTTERFLY	0	BUTTERFLY
cluster10901_1rr.inclade1.ortho1.tre	ME0	ME26	FALSE	TRUE	1.09286	0.22239	0.870472	-0.648082	14.2779	3.73066	10.5473	-6.81662	0.336	0.0116557	-0.0116899	NA	NA	NA	NA	NA	TRUE	FALSE	0	0	0	HUMMINGBIRD
cluster10902_1rr.inclade1.ortho1.tre	ME27	ME5	FALSE	FALSE	20.5171	9.32082	11.1962	-1.87542	19.9036	7.74464	12.159	-4.41435	0.22487	-0.100303	0.074017	RU2A_ARATH	U2 small nuclear ribonucleoprotein A' (U2 snRNP A')	mRNA splicing, via spliceosome [GO:0000398]; response to cold [GO:0009409]	Cajal body [GO:0015030]; chloroplast [GO:0009507]; cytoplasm [GO:0005737]; cytosol [GO:0005829]; nucleolus [GO:0005730]; nucleoplasm [GO:0005654]; nucleus [GO:0005634]	RNA binding [GO:0003723]	FALSE	FALSE	BEE	BEE	BEE	BEE
cluster10903_1rr.inclade1.ortho1.tre	ME5	ME8	FALSE	FALSE	5.97019	1.79437	4.17583	-2.38146	10.2958	2.09386	8.20198	-6.10812	0.42616	0.0317768	0.024357	ATB16_ARATH	Homeobox-leucine zipper protein ATHB-16 (HD-ZIP protein ATHB-16) (Homeodomain transcription factor ATHB-16)	negative regulation of cell growth [GO:0030308]; photoperiodism, flowering [GO:0048573]; positive regulation of transcription, DNA-templated [GO:0045893]; regulation of timing of transition from vegetative to reproductive phase [GO:0048510]; response to ME2 light [GO:0009637]; transcription, DNA-templated [GO:0006351]	nucleus [GO:0005634]	DNA-binding transcription factor activity [GO:0003700]; sequence-specific DNA binding [GO:0043565]	FALSE	FALSE	HUMMINGBIRD	0	HUMMINGBIRD	0
cluster10904_1rr.inclade1.ortho1.tre	ME6	ME18	FALSE	FALSE	4.51619	1.03101	3.48518	-2.45416	3.25539	0.390249	2.86514	-2.47489	0.24849	0.0253388	0.00853935	U1125_ARATH	U11/U12 small nuclear ribonucleoprotein 25 kDa protein (U11/U12 snRNP 25 kDa protein) (U11/U12-25K)	mRNA processing [GO:0006397]; RNA splicing [GO:0008380]	spliceosomal complex [GO:0005681]		FALSE	TRUE	BEE	HUMMINGBIRD	BEE	HUMMINGBIRD
cluster10905_1rr.inclade2.ortho1.tre	ME0	ME55	FALSE	FALSE	2.80058	1.248	1.55258	-0.304575	8.82705	1.36586	7.46119	-6.09533	0.38175	0.00692103	0.00249543	NA	NA	NA	NA	NA	TRUE	FALSE	0	HUMMINGBIRD	0	HUMMINGBIRD
cluster10907_1rr.inclade1.ortho1.tre	ME24	ME1	TRUE	FALSE	59.2826	14.3279	44.9547	-30.6268	86.4168	54.1117	32.3051	21.8066	0.1524	-0.0579838	-0.0876553	NA	NA	NA	NA	NA	FALSE	FALSE	0	0	0	0
cluster10908_1rr.inclade1.ortho3.tre	ME4	ME3	FALSE	FALSE	61.0365	24.6127	36.4238	-11.8111	26.2276	12.6107	13.6168	-1.00608	0.13946	0.0548783	0.00664098	NA	NA	NA	NA	NA	FALSE	FALSE	0	0	0	BUTTERFLY
cluster10909_1rr.inclade1.ortho1.tre	ME0	ME0	FALSE	TRUE	1.7318	0.401386	1.33041	-0.929024	3.02891	0.931169	2.09774	-1.16657	0.40327	0.00140657	-0.069198	NA	NA	NA	NA	NA	TRUE	TRUE	0	0	0	0
cluster10910_1rr.inclade1.ortho1.tre	ME1	ME1	FALSE	TRUE	43.4613	31.8129	11.6484	20.1645	118.708	85.1826	33.5253	51.6573	0.43563	-0.0302518	0.0163951	RD522_ARATH	DNA repair RAD52-like protein 2, chloroplastic (Organellar DNA-binding protein 2)	double-strand break repair via homologous recombination [GO:0000724]	chloroplast [GO:0009507]	DNA binding [GO:0003677]	FALSE	FALSE	0	0	0	0
cluster10911_1rr.inclade1.ortho1.tre	ME50	ME61	FALSE	FALSE	5.79463	1.60829	4.18633	-2.57804	13.8238	3.04183	10.7819	-7.74011	0.31003	0.0232556	-0.0568666	NFD4_ARATH	Protein NUCLEAR FUSION DEFECTIVE 4	karyogamy [GO:0000741]; polar nucleus fusion [GO:0010197]; response to salt stress [GO:0009651]	integral component of membrane [GO:0016021]; mitochondrion [GO:0005739]		FALSE	FALSE	0	0	0	BUTTERFLY
cluster10913_1rr.inclade1.ortho4.tre	ME0	ME10	FALSE	FALSE	13.0789	2.03108	11.0478	-9.0167	22.4707	5.15194	17.3187	-12.1668	0.60993	0.135123	0.000625252	NA	NA	NA	NA	NA	FALSE	FALSE	0	0	0	0
cluster10916_1rr.inclade1.ortho3.tre	ME1	ME2	FALSE	FALSE	45.7056	34.1032	11.6025	22.5007	53.28	18.2285	35.0515	-16.823	0.24761	-0.0373145	-0.0429923	ZOX_PHAVU	Zeatin O-xylosyltransferase (EC 2.4.2.40) (Zeatin O-beta-D-xylosyltransferase)	cytokinin metabolic process [GO:0009690]; protein glycosylation [GO:0006486]		transferase activity, transferring hexosyl groups [GO:0016758]; zeatin O-beta-D-xylosyltransferase activity [GO:0050404]	FALSE	FALSE	0	0	0	BEE
cluster10917_1rr.inclade1.ortho1.tre	ME41	ME4	FALSE	FALSE	19.8525	0.966905	18.8856	-17.9187	45.4667	15.2723	30.1944	-14.9221	0.11844	0.0502491	0.00109391	RUBA_PEA	RuBisCO large subunit-binding protein subunit alpha, chloroplastic (60 kDa chaperonin subunit alpha) (CPN-60 alpha)	protein refolding [GO:0042026]	chloroplast [GO:0009507]	ATP binding [GO:0005524]	FALSE	FALSE	0	0	0	0
cluster10918_1rr.inclade1.ortho1.tre	ME42	ME2	FALSE	FALSE	11.7452	1.00657	10.7387	-9.73208	8.13009	2.22808	5.902	-3.67392	0.24732	0.175057	0.0480797	NA	NA	NA	NA	NA	FALSE	FALSE	HUMMINGBIRD	0	HUMMINGBIRD	BEE
cluster10919_1rr.inclade1.ortho1.tre	ME6	ME5	FALSE	FALSE	7.91125	4.98662	2.92462	2.062	12.7777	5.61581	7.1619	-1.54609	0.384	-0.000477128	0.023797	HSR4_ARATH	Protein HYPER-SENSITIVITY-RELATED 4 (AtHSR4) (EC 3.6.1.3) (BCS1-like protein)	cell death [GO:0008219]; plant-type hypersensitive response [GO:0009626]; response to bacterium [GO:0009617]; response to molecule of bacterial origin [GO:0002237]; response to UV [GO:0009411]; salicylic acid mediated signaling pathway [GO:0009863]	integral component of membrane [GO:0016021]; mitochondrial envelope [GO:0005740]; mitochondrial outer membrane [GO:0005741]; mitochondrion [GO:0005739]	ATPase activity [GO:0016887]; ATP binding [GO:0005524]; identical protein binding [GO:0042802]	FALSE	FALSE	BEE	BEE	BEE	BEE
cluster1092_1rr.inclade1.ortho4.tre	ME0	ME43	FALSE	FALSE	2.78415	0.841835	1.94231	-1.10048	9.6097	1.46496	8.14474	-6.67979	0.38107	0.0107144	0.0691252	PPOX1_ARATH	Pyridoxine/pyridoxamine 5'-phosphate oxidase 1, chloroplastic (AtPPOX1) [Includes: Pyridoxine/pyridoxamine 5'-phosphate oxidase (EC 1.4.3.5) (PNP/PMP oxidase) (PNPOx) (Pyridoxal 5'-phosphate synthase); Probable NAD(P)HX epimerase (EC 5.1.99.6)]	NADH metabolic process [GO:0006734]; NADP metabolic process [GO:0006739]; pyridoxine biosynthetic process [GO:0008615]	chloroplast [GO:0009507]; cytosol [GO:0005829]; mitochondrion [GO:0005739]	FMN binding [GO:0010181]; metal ion binding [GO:0046872]; NADHX epimerase activity [GO:0052856]; NADPHX epimerase activity [GO:0052857]; pyridoxamine-phosphate oxidase activity [GO:0004733]	TRUE	FALSE	0	0	0	0
cluster10920_1rr.inclade1.ortho2.tre	ME3	ME2	TRUE	FALSE	47.0651	36.3706	10.6945	25.6761	64.695	58.7311	5.9639	52.7672	0.31795	-0.0738099	-0.107655	PRF1_SOLLC	36.4 kDa proline-rich protein				FALSE	FALSE	0	0	BEE	BEE
cluster10920_1rr.inclade1.ortho4.tre	ME11	ME4	FALSE	FALSE	39.1893	13.3581	25.8312	-12.4732	82.3388	53.8412	28.4976	25.3436	0.36149	0.0842059	0.0897893	PRF1_SOLLC	36.4 kDa proline-rich protein				FALSE	FALSE	0	0	0	0
cluster10922_1rr.inclade1.ortho3.tre	ME0	ME51	FALSE	FALSE	4.73359	1.52709	3.20649	-1.6794	14.1884	4.07206	10.1163	-6.04428	0.19687	-0.0259116	0.0323697	CESA9_ORYSJ	Cellulose synthase A catalytic subunit 9 [UDP-forming] (EC 2.4.1.12) (OsCesA9)	cellulose biosynthetic process [GO:0030244]; plant-type primary cell wall biogenesis [GO:0009833]; plant-type secondary cell wall biogenesis [GO:0009834]; rhamnogalacturonan I side chain metabolic process [GO:0010400]	cellulose synthase complex [GO:0010330]; chloroplast [GO:0009507]; Golgi apparatus [GO:0005794]; integral component of membrane [GO:0016021]; plasma membrane [GO:0005886]	cellulose synthase (UDP-forming) activity [GO:0016760]; cellulose synthase activity [GO:0016759]; metal ion binding [GO:0046872]	FALSE	FALSE	0	0	0	0
cluster10923_1rr.inclade1.ortho2.tre	ME7	ME7	FALSE	FALSE	53.7136	20.8312	32.8824	-12.0512	10.1332	2.44963	7.68359	-5.23396	0.49727	0.0366321	-0.0455567	ROSY1_ARATH	MD-2-related lipid-recognition protein ROSY1 (Protein INTERACTOR OF SYNAPTOTAGMIN 1)	intracellular sterol transport [GO:0032366]; positive gravitropism [GO:0009958]; response to salt stress [GO:0009651]	cytoplasm [GO:0005737]	phosphatidylethanolamine binding [GO:0008429]; sterol binding [GO:0032934]	FALSE	FALSE	0	0	0	0
cluster10923_2rr.inclade1.ortho3.tre	ME18	ME48	FALSE	FALSE	23.0507	5.36535	17.6853	-12.3199	31.2564	4.16467	27.0917	-22.9271	0.41031	-0.0406795	-0.0160605	ROSY1_ARATH	MD-2-related lipid-recognition protein ROSY1 (Protein INTERACTOR OF SYNAPTOTAGMIN 1)	intracellular sterol transport [GO:0032366]; positive gravitropism [GO:0009958]; response to salt stress [GO:0009651]	cytoplasm [GO:0005737]	phosphatidylethanolamine binding [GO:0008429]; sterol binding [GO:0032934]	FALSE	FALSE	BUTTERFLY	HUMMINGBIRD	BUTTERFLY	HUMMINGBIRD
cluster10924_1rr.inclade1.ortho1.tre	ME5	ME8	FALSE	FALSE	6.24059	2.75077	3.48982	-0.739051	19.5654	6.40586	13.1596	-6.7537	0.24413	0.0678318	0.0254397	AGL80_ARATH	Agamous-like MADS-box protein AGL80	positive regulation of transcription by RNA polymerase II [GO:0045944]; transcription, DNA-templated [GO:0006351]	nucleus [GO:0005634]; polar nucleus [GO:0043078]	DNA-binding transcription factor activity [GO:0003700]; protein dimerization activity [GO:0046983]; proximal promoter sequence-specific DNA binding [GO:0000987]; sequence-specific DNA binding [GO:0043565]; transcription factor activity, RNA polymerase II proximal promoter sequence-specific DNA binding [GO:0000982]	FALSE	FALSE	HUMMINGBIRD	0	HUMMINGBIRD	0
cluster10926_1rr.inclade1.ortho1.tre	ME22	ME2	FALSE	FALSE	3.01637	0.400268	2.6161	-2.21583	4.68663	2.00038	2.68625	-0.685866	0.32245	-0.0723256	0.0176046	UFOG5_MANES	Anthocyanidin 3-O-glucosyltransferase 5 (EC 2.4.1.115) (Flavonol 3-O-glucosyltransferase 5) (UDP-glucose flavonoid 3-O-glucosyltransferase 5)	anthocyanin-containing compound biosynthetic process [GO:0009718]		anthocyanidin 3-O-glucosyltransferase activity [GO:0047213]	FALSE	FALSE	HUMMINGBIRD	0	HUMMINGBIRD	BEE
cluster10927_1rr.inclade1.ortho1.tre	ME0	ME24	FALSE	TRUE	3.17993	0.584476	2.59546	-2.01098	12.1203	3.0906	9.0297	-5.9391	0.45972	-0.0399292	-0.0564225	TBL19_ARATH	Protein trichome birefringence-like 19	cell wall organization or biogenesis [GO:0071554]	Golgi apparatus [GO:0005794]; integral component of membrane [GO:0016021]	O-acetyltransferase activity [GO:0016413]	FALSE	FALSE	0	HUMMINGBIRD	0	HUMMINGBIRD
cluster10927_2rr.inclade1.ortho1.tre	ME4	ME28	FALSE	FALSE	12.5839	6.9721	5.61183	1.36027	3.56355	0.485772	3.07778	-2.59201	0.17646	0.0801382	0.0662858	TBL19_ARATH	Protein trichome birefringence-like 19	cell wall organization or biogenesis [GO:0071554]	Golgi apparatus [GO:0005794]; integral component of membrane [GO:0016021]	O-acetyltransferase activity [GO:0016413]	FALSE	TRUE	0	0	0	0
cluster10928_1rr.inclade1.ortho4.tre	ME13	ME37	FALSE	FALSE	10.3448	3.06147	7.28332	-4.22186	9.95396	1.6921	8.26186	-6.56977	0.27954	0.0438603	-0.0761195	FAP1_ARATH	Fatty-acid-binding protein 1 (AtFAP1) (Chalcone-flavanone isomerase family protein 1)	fatty acid metabolic process [GO:0006631]	chloroplast [GO:0009507]; chloroplast envelope [GO:0009941]; chloroplast stroma [GO:0009570]; mitochondrion [GO:0005739]; plastid [GO:0009536]	fatty acid binding [GO:0005504]; intramolecular lyase activity [GO:0016872]	FALSE	FALSE	HUMMINGBIRD	0	HUMMINGBIRD	0
cluster10929_1rr.inclade1.ortho1.tre	ME6	ME5	FALSE	FALSE	2.04354	0.496081	1.54746	-1.05138	9.68422	2.45281	7.2314	-4.77859	0.19918	0.0473435	0.0948657	E1314_ARATH	Glucan endo-1,3-beta-glucosidase 14 (EC 3.2.1.39) ((1->3)-beta-glucan endohydrolase 14) ((1->3)-beta-glucanase 14) (Beta-1,3-endoglucanase 14) (Beta-1,3-glucanase 14)	carbohydrate metabolic process [GO:0005975]; cell wall organization [GO:0071555]; defense response [GO:0006952]	anchored component of plasma membrane [GO:0046658]; cell wall [GO:0005618]; cytoplasm [GO:0005737]; extracellular region [GO:0005576]; nucleus [GO:0005634]	glucan endo-1,3-beta-D-glucosidase activity [GO:0042973]; hydrolase activity, hydrolyzing O-glycosyl compounds [GO:0004553]; polysaccharide binding [GO:0030247]	TRUE	FALSE	BEE	BEE	BEE	BEE
cluster1093_1rr.inclade1.ortho3.tre	ME0	ME2	FALSE	FALSE	1.0362	0.259398	0.776798	-0.5174	3.98603	1.8011	2.18494	-0.38384	0.28912	0.0304372	-0.0205928	YODA_ARATH	Mitogen-activated protein kinase kinase kinase YODA (EC 2.7.11.25) (YODA MAPKK kinase)	activation of protein kinase activity [GO:0032147]; inflorescence development [GO:0010229]; regulation of growth [GO:0040008]; regulation of mitotic cell cycle [GO:0007346]; signal transduction by protein phosphorylation [GO:0023014]; stomatal complex morphogenesis [GO:0010103]; stress-activated protein kinase signaling cascade [GO:0031098]; suspensor development [GO:0010098]	cytoplasm [GO:0005737]	ATP binding [GO:0005524]; MAP kinase kinase kinase activity [GO:0004709]; protein serine/threonine kinase activity [GO:0004674]	TRUE	TRUE	0	0	0	BEE
cluster10930_1rr.inclade1.ortho3.tre	ME58	ME3	FALSE	FALSE	8.7171	1.68261	7.03448	-5.35187	55.78	34.1272	21.6528	12.4744	0.29988	-0.0478094	0.0688761	RLK7_ARATH	Receptor-like protein kinase 7 (EC 2.7.11.1)	innate immune response [GO:0045087]; protein autophosphorylation [GO:0046777]; response to oxidative stress [GO:0006979]; seed germination [GO:0009845]	integral component of membrane [GO:0016021]; plasma membrane [GO:0005886]	ATP binding [GO:0005524]; peptide receptor activity [GO:0001653]; protein kinase activity [GO:0004672]; protein serine/threonine kinase activity [GO:0004674]	FALSE	FALSE	0	0	0	BUTTERFLY
cluster10931_1rr.inclade1.ortho1.tre	ME45	ME2	FALSE	FALSE	14.6611	1.37457	13.2865	-11.912	30.6276	9.78906	20.8386	-11.0495	0.46976	-0.0349479	-0.00240783	HPR3_ARATH	Glyoxylate/hydroxypyruvate reductase HPR3 (EC 1.1.1.79) (EC 1.1.1.81) (NAD(P)H-dependent hydroxypyruvate reductase 3) (AtHPR3) (HPR 3)	oxidative photosynthetic carbon pathway [GO:0009854]; photorespiration [GO:0009853]	cytosol [GO:0005829]	glyoxylate reductase (NADP) activity [GO:0030267]; hydroxypyruvate reductase activity [GO:0016618]; NAD binding [GO:0051287]	FALSE	FALSE	HUMMINGBIRD	0	HUMMINGBIRD	BEE
cluster10933_1rr.inclade1.ortho1.tre	ME0	ME18	FALSE	FALSE	6.52509	1.31737	5.20772	-3.89035	21.7218	6.50038	15.2214	-8.72106	0.37492	0.0128815	0.0497705	Y4990_ARATH	Uncharacterized protein At4g19900				FALSE	FALSE	0	HUMMINGBIRD	0	HUMMINGBIRD
cluster10934_1rr.inclade1.ortho3.tre	ME6	ME5	FALSE	FALSE	33.5267	23.9346	9.59209	14.3425	62.2167	42.9111	19.3056	23.6055	0.03489	0.0426153	0.0181704	PHB3_ARATH	Prohibitin-3, mitochondrial (Atphb3) (Protein ENHANCED ETHYLENE RESPONSE 3)	cell division [GO:0051301]; lateral root development [GO:0048527]; mitochondrion organization [GO:0007005]; negative regulation of cell division [GO:0051782]; response to auxin [GO:0009733]; response to ethylene [GO:0009723]; response to nitric oxide [GO:0071731]; response to salt stress [GO:0009651]	integral component of membrane [GO:0016021]; membrane [GO:0016020]; mitochondrial respiratory chain complex I [GO:0005747]; mitochondrion [GO:0005739]; nucleolus [GO:0005730]; plasma membrane [GO:0005886]; vacuolar membrane [GO:0005774]; vacuole [GO:0005773]		FALSE	FALSE	BEE	BEE	BEE	BEE
cluster10936_1rr.inclade1.ortho3.tre	ME2	ME1	FALSE	FALSE	26.6112	18.7774	7.83383	10.9436	51.889	35.2362	16.6528	18.5834	0.15631	-0.0932523	-0.0486164	CCME_ARATH	Cytochrome c-type biogenesis protein CcmE homolog, mitochondrial (Cytochrome c maturation protein E homolog) (AtCCME) (Heme chaperone CcmE homolog)	cytochrome c-heme linkage [GO:0018063]	integral component of membrane [GO:0016021]; mitochondrial inner membrane [GO:0005743]; mitochondrial intermembrane space [GO:0005758]; plasma membrane [GO:0005886]	heme binding [GO:0020037]; metal ion binding [GO:0046872]	FALSE	FALSE	0	0	0	0
cluster10937_1rr.inclade1.ortho3.tre	ME0	ME2	FALSE	FALSE	6.94287	1.05378	5.88909	-4.8353	13.3352	7.99416	5.34101	2.65315	0.46349	-0.0621702	-0.0129124	RL4A_ARATH	60S ribosomal protein L4-1 (L1)	cytoplasmic translation [GO:0002181]	cell wall [GO:0005618]; chloroplast [GO:0009507]; cytosol [GO:0005829]; cytosolic large ribosomal subunit [GO:0022625]; cytosolic ribosome [GO:0022626]; membrane [GO:0016020]; nucleolus [GO:0005730]; plasma membrane [GO:0005886]; plasmodesma [GO:0009506]; polysomal ribosome [GO:0042788]; vacuole [GO:0005773]	mRNA binding [GO:0003729]; structural constituent of ribosome [GO:0003735]	FALSE	FALSE	0	0	0	BEE
cluster10938_1rr.inclade1.ortho3.tre	ME34	ME21	FALSE	FALSE	6.60559	0.701168	5.90443	-5.20326	13.4386	3.45251	9.98611	-6.53359	0.5852	0.0315726	0.0963141	NA	NA	NA	NA	NA	FALSE	FALSE	HUMMINGBIRD	HUMMINGBIRD	HUMMINGBIRD	HUMMINGBIRD
cluster1094_1rr.inclade1.ortho2.tre	ME0	ME1	FALSE	FALSE	4.97614	0.363822	4.61231	-4.24849	10.5406	5.70732	4.83328	0.874044	0.27839	0.0283646	-0.0568147	CRK_DAUCA	CDPK-related protein kinase (EC 2.7.11.1) (PK421)			ATP binding [GO:0005524]; protein serine/threonine kinase activity [GO:0004674]	FALSE	FALSE	0	0	0	0
cluster1094_1rr.inclade2.ortho1.tre	ME22	ME24	FALSE	FALSE	4.70398	1.70559	2.99839	-1.2928	6.61409	1.89766	4.71643	-2.81877	0.15154	-0.0480698	-0.050562	CAMK3_ARATH	CDPK-related kinase 3 (AtCRK3) (EC 2.7.11.1) (Calcium/calmodulin-dependent protein kinase 4) (AtCK)	abscisic acid-activated signaling pathway [GO:0009738]; cellular response to abscisic acid stimulus [GO:0071215]; intracellular signal transduction [GO:0035556]; leaf senescence [GO:0010150]; peptidyl-serine phosphorylation [GO:0018105]; protein autophosphorylation [GO:0046777]	cytoplasm [GO:0005737]; nucleus [GO:0005634]; plasma membrane [GO:0005886]	ATP binding [GO:0005524]; calcium-dependent protein serine/threonine kinase activity [GO:0009931]; calcium ion binding [GO:0005509]; calmodulin binding [GO:0005516]; calmodulin-dependent protein kinase activity [GO:0004683]; protein serine/threonine kinase activity [GO:0004674]	FALSE	FALSE	HUMMINGBIRD	HUMMINGBIRD	HUMMINGBIRD	HUMMINGBIRD
cluster10940_1rr.inclade1.ortho1.tre	ME41	ME7	FALSE	FALSE	20.4038	2.6588	17.745	-15.0862	37.5339	8.11713	29.4168	-21.2997	0.32638	0.046699	0.0144886	RLA1_MAIZE	60S acidic ribosomal protein P1 (L12)	translational elongation [GO:0006414]	cytosolic large ribosomal subunit [GO:0022625]	protein-containing complex binding [GO:0044877]; structural constituent of ribosome [GO:0003735]	FALSE	FALSE	0	0	0	0
cluster10941_1rr.inclade1.ortho1.tre	ME0	ME16	FALSE	FALSE	0.717662	0.21356	0.504101	-0.290541	2.2752	0.400869	1.87433	-1.47346	0.15767	-0.0157715	-0.0848047	TCP14_ARATH	Transcription factor TCP14 (AtTCP14)	cell proliferation [GO:0008283]; inflorescence development [GO:0010229]; regulation of defense response [GO:0031347]; regulation of seed germination [GO:0010029]; regulation of transcription, DNA-templated [GO:0006355]; response to abscisic acid [GO:0009737]; response to cytokinin [GO:0009735]; response to gibberellin [GO:0009739]; transcription, DNA-templated [GO:0006351]	nucleus [GO:0005634]	DNA binding [GO:0003677]; DNA-binding transcription factor activity [GO:0003700]	TRUE	TRUE	0	0	0	0
cluster10941_1rr.inclade2.ortho1.tre	ME51	ME7	FALSE	TRUE	12.6974	1.98487	10.7125	-8.72765	19.9984	4.09952	15.8989	-11.7994	0.10725	0.0138074	0.084569	TCP15_ARATH	Transcription factor TCP15 (AtTCP15)	auxin homeostasis [GO:0010252]; cell proliferation [GO:0008283]; circadian rhythm [GO:0007623]; DNA endoreduplication [GO:0042023]; gynoecium development [GO:0048467]; inflorescence development [GO:0010229]; regulation of anthocyanin biosynthetic process [GO:0031540]; regulation of transcription, DNA-templated [GO:0006355]; response to cytokinin [GO:0009735]; transcription, DNA-templated [GO:0006…	nucleus [GO:0005634]	DNA binding [GO:0003677]; DNA-binding transcription factor activity [GO:0003700]	FALSE	FALSE	0	0	0	0
cluster10942_1rr.inclade1.ortho3.tre	ME6	ME5	FALSE	FALSE	2.17432	0.682758	1.49157	-0.808807	15.7842	5.13161	10.6526	-5.52098	0.28621	-0.0420709	-0.0208864	PXC3_ARATH	Leucine-rich repeat receptor-like tyrosine-protein kinase PXC3 (EC 2.7.10.1) (Protein PXY/TDR-CORRELATED 3)		integral component of membrane [GO:0016021]; plasma membrane [GO:0005886]	ATP binding [GO:0005524]; transmembrane receptor protein tyrosine kinase activity [GO:0004714]	TRUE	FALSE	BEE	BEE	BEE	BEE
cluster10943_1rr.inclade1.ortho1.tre	ME18	ME9	FALSE	TRUE	14.8105	8.36849	6.44204	1.92644	43.7893	18.9501	24.8392	-5.88917	0.23126	-0.0566527	0.00565066	NA	NA	NA	NA	NA	FALSE	FALSE	BUTTERFLY	0	BUTTERFLY	0
cluster10945_1rr.inclade1.ortho1.tre	ME22	ME0	FALSE	FALSE	5.87312	2.11553	3.75758	-1.64205	7.51384	0.405833	7.10801	-6.70217	0.7447	-0.0570128	0.0041316	GGPPS_CATRO	Geranylgeranyl pyrophosphate synthase, chloroplastic (GGPP synthase) (GGPS) (EC 2.5.1.-) ((2E,6E)-farnesyl diphosphate synthase) (Dimethylallyltranstransferase) (EC 2.5.1.1) (Farnesyl diphosphate synthase) (Farnesyltranstransferase) (EC 2.5.1.29) (Geranyltranstransferase) (EC 2.5.1.10)	carotenoid biosynthetic process [GO:0016117]; farnesyl diphosphate biosynthetic process [GO:0045337]; geranyl diphosphate biosynthetic process [GO:0033384]; geranylgeranyl diphosphate biosynthetic process [GO:0033386]	chloroplast [GO:0009507]	dimethylallyltranstransferase activity [GO:0004161]; farnesyltranstransferase activity [GO:0004311]; geranyltranstransferase activity [GO:0004337]; metal ion binding [GO:0046872]	FALSE	FALSE	HUMMINGBIRD	0	HUMMINGBIRD	0
cluster10945_2rr.inclade1.ortho1.tre	ME8	ME35	FALSE	TRUE	10.663	2.03187	8.63117	-6.5993	17.6637	3.00227	14.6615	-11.6592	0.79079	0.0762715	0.145054	GGPPS_CATRO	Geranylgeranyl pyrophosphate synthase, chloroplastic (GGPP synthase) (GGPS) (EC 2.5.1.-) ((2E,6E)-farnesyl diphosphate synthase) (Dimethylallyltranstransferase) (EC 2.5.1.1) (Farnesyl diphosphate synthase) (Farnesyltranstransferase) (EC 2.5.1.29) (Geranyltranstransferase) (EC 2.5.1.10)	carotenoid biosynthetic process [GO:0016117]; farnesyl diphosphate biosynthetic process [GO:0045337]; geranyl diphosphate biosynthetic process [GO:0033384]; geranylgeranyl diphosphate biosynthetic process [GO:0033386]	chloroplast [GO:0009507]	dimethylallyltranstransferase activity [GO:0004161]; farnesyltranstransferase activity [GO:0004311]; geranyltranstransferase activity [GO:0004337]; metal ion binding [GO:0046872]	FALSE	FALSE	0	0	0	0
cluster10946_1rr.inclade1.ortho4.tre	ME28	ME10	FALSE	TRUE	2.72569	0.473196	2.25249	-1.77929	6.91898	2.15588	4.7631	-2.60721	0.42901	0.00995431	0.0358735	NA	NA	NA	NA	NA	TRUE	FALSE	HUMMINGBIRD	0	HUMMINGBIRD	0
cluster10947_2rr.inclade1.ortho2.tre	ME2	ME1	FALSE	FALSE	61.9537	42.7312	19.2225	23.5088	54.648	36.1558	18.4922	17.6636	0.13233	-0.0642306	-0.0166284	RRA3_ARATH	Arabinosyltransferase RRA3 (EC 2.4.2.-) (Protein REDUCED RESIDUAL ARABINOSE 3)	cell wall biogenesis [GO:0042546]; cell wall organization [GO:0071555]; root hair cell development [GO:0080147]	endosome [GO:0005768]; Golgi apparatus [GO:0005794]; Golgi membrane [GO:0000139]; integral component of membrane [GO:0016021]; trans-Golgi network [GO:0005802]	transferase activity, transferring glycosyl groups [GO:0016757]	FALSE	FALSE	0	0	0	0
cluster10948_1rr.inclade1.ortho1.tre	ME44	ME17	TRUE	FALSE	32.5587	6.28847	26.2703	-19.9818	29.3695	12.3439	17.0255	-4.68161	0.20741	0.145533	-0.0682374	SHT_ARATH	Spermidine hydroxycinnamoyl transferase (EC 2.3.1.-) (BAHD-like hydroxycinnamoyl transferase)	pollen development [GO:0009555]; pollen exine formation [GO:0010584]; spermidine hydroxycinnamate conjugate biosynthetic process [GO:0080088]		N-acyltransferase activity [GO:0016410]; spermidine:caffeoyl CoA N-acyltransferase activity [GO:0080074]; spermidine:coumaroyl CoA N-acyltransferase activity [GO:0080073]; spermidine:feruloyl CoA N-acyltransferase activity [GO:0080075]; spermidine:sinapoyl CoA N-acyltransferase activity [GO:0080072]	FALSE	FALSE	0	BUTTERFLY	0	BUTTERFLY
cluster10948_1rr.inclade1.ortho2.tre	ME15	ME7	FALSE	FALSE	23.1591	8.53606	14.6231	-6.08702	72.94	30.6447	42.2953	-11.6505	0.34079	0.0766892	0.121293	SHT_ARATH	Spermidine hydroxycinnamoyl transferase (EC 2.3.1.-) (BAHD-like hydroxycinnamoyl transferase)	pollen development [GO:0009555]; pollen exine formation [GO:0010584]; spermidine hydroxycinnamate conjugate biosynthetic process [GO:0080088]		N-acyltransferase activity [GO:0016410]; spermidine:caffeoyl CoA N-acyltransferase activity [GO:0080074]; spermidine:coumaroyl CoA N-acyltransferase activity [GO:0080073]; spermidine:feruloyl CoA N-acyltransferase activity [GO:0080075]; spermidine:sinapoyl CoA N-acyltransferase activity [GO:0080072]	FALSE	FALSE	0	0	0	0
cluster10949_1rr.inclade1.ortho1.tre	ME41	ME20	FALSE	TRUE	18.499	2.96289	15.5361	-12.5732	43.3118	7.67774	35.6341	-27.9563	0.09106	0.040185	0.0498119	Y5486_ARATH	Uncharacterized protein At5g64816				FALSE	FALSE	0	0	0	0
cluster10953_1rr.inclade1.ortho1.tre	ME10	ME3	FALSE	FALSE	25.8434	11.295	14.5484	-3.25332	76.197	49.0795	27.1175	21.962	0.16558	0.0328045	-0.0219693	NA	NA	NA	NA	NA	FALSE	FALSE	0	0	0	BUTTERFLY
cluster10954_1rr.inclade1.ortho1.tre	ME9	ME8	FALSE	FALSE	7.88928	2.08905	5.80024	-3.71119	13.811	2.96032	10.8507	-7.89038	0.41826	0.0304643	0.0620518	PP152_ARATH	Pentatricopeptide repeat-containing protein At2g15630, mitochondrial	RNA modification [GO:0009451]	intracellular membrane-bounded organelle [GO:0043231]; mitochondrion [GO:0005739]	endonuclease activity [GO:0004519]; RNA binding [GO:0003723]	FALSE	FALSE	HUMMINGBIRD	0	HUMMINGBIRD	0
cluster10955_1rr.inclade1.ortho2.tre	ME15	ME3	FALSE	FALSE	37.9267	10.2724	27.6543	-17.3819	95.3387	62.314	33.0247	29.2893	0.28829	0.0731803	-0.0203765	MBOA1_ARATH	Lysophospholipid acyltransferase 1 (AtLPLAT1) (EC 2.3.1.-) (1-acylglycerophosphocholine O-acyltransferase 1) (EC 2.3.1.23) (1-acylglycerophosphoethanolamine O-acyltransferase) (EC 2.3.1.n7) (1-acylglycerophosphoserine O-acyltransferase) (EC 2.3.1.n6) (Lysophosphatidylcholine acyltransferase 1) (LPCAT1) (Lysophosphatidylethanolamine acyltransferase) (LPEAT) (Lysophosphatidylglycerol acyltransferas…	galactolipid biosynthetic process [GO:0019375]; glycerolipid biosynthetic process [GO:0045017]; phospholipid biosynthetic process [GO:0008654]	endoplasmic reticulum [GO:0005783]; endoplasmic reticulum membrane [GO:0005789]; integral component of membrane [GO:0016021]; plasma membrane [GO:0005886]	1-acylglycerophosphocholine O-acyltransferase activity [GO:0047184]; lysophospholipid acyltransferase activity [GO:0071617]; transferase activity, transferring acyl groups [GO:0016746]	FALSE	FALSE	0	0	0	BUTTERFLY
cluster10956_1rr.inclade1.ortho1.tre	ME24	ME1	FALSE	FALSE	51.2435	10.774	40.4695	-29.6955	113.891	80.7147	33.1763	47.5384	0.26293	-0.0743584	-0.0404178	PIP27_MAIZE	Aquaporin PIP2-7 (Plasma membrane intrinsic protein 2-7) (ZmPIP2-7) (ZmPIP2;7)		integral component of membrane [GO:0016021]; plasma membrane [GO:0005886]	water channel activity [GO:0015250]	FALSE	FALSE	0	0	0	0
cluster10956_1rr.inclade2.ortho1.tre	ME3	ME2	FALSE	FALSE	11.0101	5.17237	5.83777	-0.665403	40.3765	33.2059	7.17065	26.0352	0.39137	0.0230013	-0.00189683	PIP22_ARATH	Aquaporin PIP2-2 (Plasma membrane intrinsic protein 2-2) (AtPIP2;2) (Plasma membrane intrinsic protein 2b) (PIP2b) (TMP2b)	ion transmembrane transport [GO:0034220]; response to abscisic acid [GO:0009737]; response to water deprivation [GO:0009414]; water transport [GO:0006833]	chloroplast [GO:0009507]; integral component of plasma membrane [GO:0005887]; plasma membrane [GO:0005886]; plasmodesma [GO:0009506]	mRNA binding [GO:0003729]; water channel activity [GO:0015250]	FALSE	FALSE	0	0	BEE	BEE
cluster10957_2rr.inclade1.ortho1.tre	ME0	ME2	FALSE	FALSE	1.90287	0.332194	1.57068	-1.23849	4.34775	1.2279	3.11985	-1.89194	0.28912	-0.00215551	0.0102832	TMM_ARATH	Protein TOO MANY MOUTHS (Receptor-like protein 17) (AtRLP17)	asymmetric cell division [GO:0008356]; cellular response to abscisic acid stimulus [GO:0071215]; defense response to fungus [GO:0050832]; innate immune response [GO:0045087]; regulation of antifungal innate immune response [GO:1905034]; response to abscisic acid [GO:0009737]; stomatal complex formation [GO:0010376]; stomatal complex patterning [GO:0010375]; trichome morphogenesis [GO:0010090]	anchored component of membrane [GO:0031225]; integral component of membrane [GO:0016021]; membrane [GO:0016020]; plasma membrane [GO:0005886]	peptide binding [GO:0042277]; receptor serine/threonine kinase binding [GO:0033612]	TRUE	TRUE	0	0	0	BEE
cluster10958_1rr.inclade1.ortho4.tre	ME17	ME15	FALSE	FALSE	7.5173	2.65064	4.86666	-2.21602	36.6868	4.85846	31.8283	-26.9699	0.39657	-0.0834349	0.00240113	NA	NA	NA	NA	NA	FALSE	FALSE	0	0	0	0
cluster10959_1rr.inclade1.ortho2.tre	ME8	ME6	FALSE	FALSE	53.7425	19.7313	34.0112	-14.2799	95.9067	35.7497	60.1569	-24.4072	0.08745	-0.155054	-0.0513481	RH35_ARATH	DEAD-box ATP-dependent RNA helicase 35 (EC 3.6.4.13)	RNA secondary structure unwinding [GO:0010501]	catalytic step 2 spliceosome [GO:0071013]; cytoplasm [GO:0005737]; nucleolus [GO:0005730]	ATP binding [GO:0005524]; ATP-dependent RNA helicase activity [GO:0004004]; RNA binding [GO:0003723]; zinc ion binding [GO:0008270]	FALSE	FALSE	0	HUMMINGBIRD	0	HUMMINGBIRD
cluster10960_1rr.inclade1.ortho3.tre	ME5	ME0	FALSE	FALSE	3.31051	1.04391	2.26659	-1.22268	6.39228	0.439781	5.9525	-5.51272	0.22163	0.0346222	-0.00537025	PFKA3_ARATH	ATP-dependent 6-phosphofructokinase 3 (ATP-PFK 3) (Phosphofructokinase 3) (EC 2.7.1.11) (Phosphohexokinase 3)	fructose 6-phosphate metabolic process [GO:0006002]; glycolytic process [GO:0006096]; root epidermal cell differentiation [GO:0010053]	cytosol [GO:0005829]	6-phosphofructokinase activity [GO:0003872]; ATP binding [GO:0005524]; metal ion binding [GO:0046872]	FALSE	FALSE	HUMMINGBIRD	0	HUMMINGBIRD	0
cluster10961_1rr.inclade1.ortho3.tre	ME8	ME21	FALSE	FALSE	23.2668	8.31066	14.9561	-6.64546	32.1786	8.51798	23.6606	-15.1427	0.19892	-0.0251492	0.0316946	UVB31_ARATH	UV-B-induced protein At3g17800, chloroplastic	response to ozone [GO:0010193]; response to UV-B [GO:0010224]; response to wounding [GO:0009611]	chloroplast [GO:0009507]		FALSE	FALSE	0	HUMMINGBIRD	0	HUMMINGBIRD
cluster10962_1rr.inclade1.ortho3.tre	ME45	ME1	FALSE	FALSE	5.42563	1.31408	4.11156	-2.79748	11.7578	7.73869	4.01914	3.71954	0.42344	-0.0527981	-0.0206986	NA	NA	NA	NA	NA	FALSE	FALSE	HUMMINGBIRD	0	HUMMINGBIRD	0
cluster10963_1rr.inclade1.ortho2.tre	ME38	ME1	FALSE	FALSE	11.0085	1.19717	9.81132	-8.61415	21.0183	12.4564	8.5619	3.89455	0.31768	-0.0502665	-0.126444	NA	NA	NA	NA	NA	FALSE	FALSE	0	0	0	0
cluster10964_1rr.inclade1.ortho3.tre	ME14	ME29	FALSE	FALSE	10.6486	3.21686	7.43172	-4.21487	19.9768	3.6578	16.319	-12.6612	0.18897	-0.0301306	0.00722537	NA	NA	NA	NA	NA	FALSE	FALSE	HUMMINGBIRD	HUMMINGBIRD	HUMMINGBIRD	HUMMINGBIRD
cluster10965_2rr.inclade1.ortho4.tre	ME18	ME1	FALSE	FALSE	28.6222	5.56031	23.0619	-17.5016	96.6778	61.545	35.1328	26.4122	1.36061	-0.018435	-0.0430281	BABL_CUCSA	Basic ME2 protein (CBP) (Cusacyanin) (Plantacyanin)			electron transfer activity [GO:0009055]; metal ion binding [GO:0046872]	FALSE	FALSE	BUTTERFLY	0	BUTTERFLY	0
cluster10968_1rr.inclade1.ortho1.tre	ME12	ME0	FALSE	FALSE	5.17993	2.00044	3.17949	-1.17904	3.65489	0.548225	3.10667	-2.55844	0.49985	0.000219381	-0.0937555	NA	NA	NA	NA	NA	FALSE	TRUE	0	0	0	0
cluster10968_2rr.inclade1.ortho1.tre	ME0	ME11	FALSE	FALSE	1.00874	0.399557	0.609184	-0.209627	12.9443	4.52081	8.42344	-3.90263	0.54934	0.00820691	0.0265594	NA	NA	NA	NA	NA	TRUE	FALSE	0	HUMMINGBIRD	0	HUMMINGBIRD
cluster10969_1rr.inclade1.ortho1.tre	ME2	ME7	FALSE	FALSE	7.17646	2.79451	4.38195	-1.58744	67.8117	21.2755	46.5362	-25.2607	0.33462	-0.0165017	0.0663236	NA	NA	NA	NA	NA	FALSE	FALSE	0	0	0	0
cluster10970_1rr.inclade1.ortho1.tre	ME3	ME18	FALSE	FALSE	5.95674	1.46387	4.49286	-3.02899	16.3653	5.11687	11.2484	-6.13155	0.52687	0.0284732	0.0219483	FIS1A_ARATH	Mitochondrial fission 1 protein A (FIS1 homolog A) (AtFIS1a) (Protein BIGYIN 1)	mitochondrial fission [GO:0000266]; mitochondrion organization [GO:0007005]; peroxisome fission [GO:0016559]	chloroplast [GO:0009507]; integral component of membrane [GO:0016021]; mitochondrial outer membrane [GO:0005741]; mitochondrion [GO:0005739]; peroxisomal membrane [GO:0005778]; peroxisome [GO:0005777]		FALSE	FALSE	0	HUMMINGBIRD	BEE	HUMMINGBIRD
cluster10971_1rr.inclade1.ortho5.tre	ME58	ME46	FALSE	FALSE	13.9338	1.56489	12.3689	-10.804	15.1168	3.37484	11.742	-8.36714	0.47549	-0.122707	-0.0597335	CCD33_ARATH	Cyclin-D3-3 (G1/S-specific cyclin-D3-3) (CycD3;3)	cell cycle [GO:0007049]; cell division [GO:0051301]; guard mother cell differentiation [GO:0010444]; seed development [GO:0048316]	nucleus [GO:0005634]		FALSE	FALSE	0	HUMMINGBIRD	0	HUMMINGBIRD
cluster10972_1rr.inclade1.ortho1.tre	ME2	ME3	TRUE	FALSE	49.2771	43.461	5.81606	37.6449	29.9472	14.5582	15.389	-0.830836	0.04404	-0.0797941	0.0479833	NA	NA	NA	NA	NA	FALSE	FALSE	0	0	0	BUTTERFLY
cluster10973_1rr.inclade1.ortho1.tre	ME2	ME3	FALSE	FALSE	33.8289	26.9183	6.91056	20.0078	58.7012	35.2043	23.4969	11.7074	0.35134	-0.0569851	0.0351823	NA	NA	NA	NA	NA	FALSE	FALSE	0	0	0	BUTTERFLY
cluster10974_1rr.inclade1.ortho2.tre	ME26	ME37	FALSE	FALSE	3.79009	0.340481	3.4496	-3.10912	5.69814	0.473045	5.2251	-4.75205	0.25194	-0.0020945	0.000612103	KELP_ARATH	RNA polymerase II transcriptional coactivator KELP	positive regulation of transcription initiation from RNA polymerase II promoter [GO:0060261]; transcription, DNA-templated [GO:0006351]	nucleus [GO:0005634]; transcription factor complex [GO:0005667]	DNA binding [GO:0003677]; transcription coactivator activity [GO:0003713]	FALSE	FALSE	HUMMINGBIRD	0	HUMMINGBIRD	0
cluster10976_1rr.inclade1.ortho3.tre	ME4	ME38	FALSE	FALSE	6.63215	2.05039	4.58175	-2.53136	9.54609	1.39923	8.14686	-6.74763	0.26594	0.0225845	0.0459231	BAH1L_ARATH	Probable E3 ubiquitin-protein ligase BAH1-like (EC 2.3.2.27) (RING finger protein 178) (RING-type E3 ubiquitin transferase BAH1-like)	proteasome-mediated ubiquitin-dependent protein catabolic process [GO:0043161]; protein ubiquitination [GO:0016567]	nucleus [GO:0005634]	metal ion binding [GO:0046872]; ubiquitin protein ligase activity [GO:0061630]	FALSE	FALSE	0	0	0	BUTTERFLY
cluster10977_1rr.inclade1.ortho3.tre	ME17	ME1	FALSE	FALSE	12.9553	7.70026	5.25503	2.44523	6.60785	2.17107	4.43678	-2.26571	0.37793	-0.0957892	-0.153919	SIL10_ARATH	E3 ubiquitin-protein ligase SINA-like 10 (EC 2.3.2.27) (RING-type E3 ubiquitin transferase SINA-like 10) (Seven in absentia-like protein 10)	multicellular organism development [GO:0007275]; ubiquitin-dependent protein catabolic process [GO:0006511]	nucleus [GO:0005634]	ubiquitin protein ligase activity [GO:0061630]; zinc ion binding [GO:0008270]	FALSE	FALSE	0	0	0	0
cluster10978_1rr.inclade1.ortho1.tre	ME15	ME7	FALSE	FALSE	10.5605	3.41884	7.14168	-3.72284	73.1452	20.5466	52.5986	-32.0521	0.13697	-0.0133552	0.124418	CAF1G_ARATH	Probable CCR4-associated factor 1 homolog 7 (EC 3.1.13.4)	exonucleolytic nuclear-transcribed mRNA catabolic process involved in deadenylation-dependent decay [GO:0043928]; negative regulation of translation [GO:0017148]; regulation of transcription, DNA-templated [GO:0006355]; transcription, DNA-templated [GO:0006351]	CCR4-NOT core complex [GO:0030015]; nucleus [GO:0005634]; P-body [GO:0000932]	metal ion binding [GO:0046872]; poly(A)-specific ribonuclease activity [GO:0004535]; RNA binding [GO:0003723]	FALSE	FALSE	0	0	0	0
cluster10979_1rr.inclade1.ortho1.tre	ME0	ME0	FALSE	FALSE	1.9761	0.603817	1.37229	-0.76847	3.68968	1.26505	2.42464	-1.15959	0.24968	0.0841492	0.0172908	VITH1_ARATH	Vacuolar iron transporter homolog 1 (Protein NODULIN-LIKE 1)	cellular manganese ion homeostasis [GO:0030026]; cellular response to ethylene stimulus [GO:0071369]; cellular response to iron ion [GO:0071281]; cellular response to nitric oxide [GO:0071732]; intracellular sequestering of iron ion [GO:0006880]; manganese ion transmembrane transport [GO:0071421]; response to iron ion [GO:0010039]	integral component of membrane [GO:0016021]; membrane [GO:0016020]; vacuolar membrane [GO:0005774]	iron ion transmembrane transporter activity [GO:0005381]; manganese ion transmembrane transporter activity [GO:0005384]	TRUE	TRUE	0	0	0	0
cluster10980_1rr.inclade1.ortho4.tre	ME22	ME14	TRUE	FALSE	23.7576	16.2145	7.54319	8.67127	30.8667	14.9754	15.8913	-0.915811	0.38172	-0.0573154	0.00315401	C3H19_ARATH	Zinc finger CCCH domain-containing protein 19 (AtC3H19) (Protein Needed for RDR2-independent DNA methylation)	DNA methylation on cytosine [GO:0032776]; gene silencing by RNA [GO:0031047]; regulation of chromatin silencing by small RNA [GO:0010964]; transcription, DNA-templated [GO:0006351]	cytosol [GO:0005829]; nucleus [GO:0005634]	DNA binding [GO:0003677]; histone binding [GO:0042393]; metal ion binding [GO:0046872]	FALSE	FALSE	HUMMINGBIRD	HUMMINGBIRD	HUMMINGBIRD	HUMMINGBIRD
cluster10981_1rr.inclade1.ortho3.tre	ME24	ME33	FALSE	TRUE	34.2556	10.1799	24.0757	-13.8958	20.5659	2.22341	18.3425	-16.1191	0.20996	-0.0264322	-0.0773868	PPR49_ARATH	Pentatricopeptide repeat-containing protein At1g18900	RNA modification [GO:0009451]	intracellular membrane-bounded organelle [GO:0043231]	endonuclease activity [GO:0004519]; RNA binding [GO:0003723]	FALSE	FALSE	0	0	0	0
cluster10982_1rr.inclade1.ortho2.tre	ME0	ME26	FALSE	FALSE	3.06018	0.917544	2.14264	-1.22509	6.97379	1.32032	5.65347	-4.33315	0.22603	0.0134256	-0.00507619	NA	NA	NA	NA	NA	FALSE	FALSE	0	0	0	HUMMINGBIRD
cluster10983_1rr.inclade1.ortho1.tre	ME20	ME1	FALSE	FALSE	44.1427	9.12015	35.0226	-25.9024	31.8325	15.2909	16.5416	-1.25073	0.10355	-0.0501975	-0.0968085	POR_DAUCA	Protochlorophyllide reductase, chloroplastic (PCR) (EC 1.3.1.33) (NADPH-protochlorophyllide oxidoreductase) (POR)	chlorophyll biosynthetic process [GO:0015995]; photosynthesis [GO:0015979]	chloroplast [GO:0009507]	protochlorophyllide reductase activity [GO:0016630]	FALSE	FALSE	HUMMINGBIRD	0	HUMMINGBIRD	0
cluster10983_1rr.inclade1.ortho2.tre	ME2	ME33	TRUE	FALSE	62.9484	54.097	8.85147	45.2455	5.68043	0.504147	5.17628	-4.67213	0.2296	-0.0942768	0.0451906	POR_DAUCA	Protochlorophyllide reductase, chloroplastic (PCR) (EC 1.3.1.33) (NADPH-protochlorophyllide oxidoreductase) (POR)	chlorophyll biosynthetic process [GO:0015995]; photosynthesis [GO:0015979]	chloroplast [GO:0009507]	protochlorophyllide reductase activity [GO:0016630]	FALSE	FALSE	0	0	0	0
cluster10984_1rr.inclade1.ortho1.tre	ME12	ME20	FALSE	FALSE	11.284	4.63983	6.64418	-2.00436	11.7387	1.50593	10.2328	-8.72686	0.25689	-0.042937	-0.0178317	GIL1_ARATH	Protein GRAVITROPIC IN THE LIGHT 1	negative gravitropism [GO:0009959]; response to ME6 or far ME6 light [GO:0009639]			FALSE	FALSE	0	0	0	0
cluster10985_1rr.inclade1.ortho2.tre	ME5	ME22	FALSE	FALSE	5.61795	3.03819	2.57976	0.45843	6.78462	1.27209	5.51253	-4.24044	0.17693	0.0149941	0.0557701	NA	NA	NA	NA	NA	FALSE	FALSE	HUMMINGBIRD	HUMMINGBIRD	HUMMINGBIRD	HUMMINGBIRD
cluster10986_1rr.inclade1.ortho1.tre	ME0	ME0	FALSE	FALSE	1.07914	0.175587	0.903557	-0.72797	1.38563	0.225278	1.16035	-0.935073	0.20431	-0.00793212	0.0377596	Y4833_ARATH	Uncharacterized protein At4g08330, chloroplastic		chloroplast [GO:0009507]; plasma membrane [GO:0005886]		TRUE	TRUE	0	0	0	0
cluster10987_1rr.inclade1.ortho1.tre	ME11	ME4	FALSE	FALSE	39.1652	9.13473	30.0305	-20.8958	45.5232	24.0467	21.4766	2.57009	0.38011	0.0721144	-0.0302717	NA	NA	NA	NA	NA	FALSE	FALSE	0	0	0	0
cluster10988_1rr.inclade1.ortho1.tre	ME26	ME11	TRUE	FALSE	18.5708	11.2014	7.36941	3.83202	34.6471	19.8806	14.7665	5.11417	0.15636	-0.0415728	0.0298813	LHCA6_ARATH	Photosystem I chlorophyll a/b-binding protein 6, chloroplastic (LHCI type III LHCA6)	photosynthesis, light harvesting in photosystem I [GO:0009768]; protein-chromophore linkage [GO:0018298]; response to ME2 light [GO:0009637]; response to far ME6 light [GO:0010218]; response to ME6 light [GO:0010114]	chloroplast [GO:0009507]; chloroplast envelope [GO:0009941]; chloroplast thylakoid membrane [GO:0009535]; integral component of membrane [GO:0016021]; photosystem I [GO:0009522]; plastoglobule [GO:0010287]	chlorophyll binding [GO:0016168]; metal ion binding [GO:0046872]; pigment binding [GO:0031409]	FALSE	FALSE	HUMMINGBIRD	HUMMINGBIRD	HUMMINGBIRD	HUMMINGBIRD
cluster10990_1rr.inclade1.ortho3.tre	ME5	ME14	FALSE	TRUE	18.1052	9.14009	8.96508	0.175012	17.8104	4.59991	13.2105	-8.61061	0.45859	0.126363	-0.0782516	NA	NA	NA	NA	NA	FALSE	FALSE	HUMMINGBIRD	HUMMINGBIRD	HUMMINGBIRD	HUMMINGBIRD
cluster10990_2rr.inclade1.ortho1.tre	ME5	ME22	FALSE	FALSE	9.73007	5.91318	3.81689	2.09629	9.93191	1.95781	7.9741	-6.01628	0.32969	0.0163755	0.022868	TCP12_ARATH	Transcription factor TCP12 (Protein BRANCHED 2)	multicellular organism development [GO:0007275]; regulation of secondary shoot formation [GO:2000032]; regulation of transcription, DNA-templated [GO:0006355]; transcription, DNA-templated [GO:0006351]	nucleus [GO:0005634]	DNA binding [GO:0003677]; DNA-binding transcription factor activity [GO:0003700]	FALSE	FALSE	HUMMINGBIRD	HUMMINGBIRD	HUMMINGBIRD	HUMMINGBIRD
cluster10991_1rr.inclade1.ortho6.tre	ME26	ME11	FALSE	FALSE	9.96839	2.78272	7.18567	-4.40296	23.68	8.90339	14.7766	-5.87323	0.31177	-0.0187209	-0.0542034	NA	NA	NA	NA	NA	FALSE	FALSE	HUMMINGBIRD	HUMMINGBIRD	HUMMINGBIRD	HUMMINGBIRD
cluster10992_1rr.inclade1.ortho1.tre	ME2	ME0	FALSE	FALSE	7.32961	3.09856	4.23105	-1.13249	4.29228	0.223108	4.06917	-3.84606	0.51551	-0.0033407	0.0336317	NHL10_ARATH	NDR1/HIN1-like protein 10 (AtNHL10) (Protein YELLOW-LEAF-SPECIFIC GENE 9)	defense response to virus [GO:0051607]; leaf senescence [GO:0010150]; response to other organism [GO:0051707]	anchored component of plasma membrane [GO:0046658]; chloroplast [GO:0009507]; integral component of membrane [GO:0016021]; plasmodesma [GO:0009506]		FALSE	TRUE	0	0	0	0
cluster10992_2rr.inclade1.ortho3.tre	ME0	ME3	FALSE	FALSE	1.01386	0.195258	0.818597	-0.623338	2.87283	1.00365	1.86918	-0.865528	0.76893	-0.0011524	0.0510377	Y1816_ARATH	Uncharacterized protein At1g08160		integral component of membrane [GO:0016021]		TRUE	TRUE	0	0	0	BUTTERFLY
cluster10993_1rr.inclade1.ortho2.tre	ME0	ME25	FALSE	FALSE	3.30843	0.942458	2.36597	-1.42351	11.798	2.0476	9.75038	-7.70278	0.59487	0.0480397	0.0314017	NA	NA	NA	NA	NA	FALSE	FALSE	0	0	0	0
cluster10994_1rr.inclade1.ortho1.tre	ME1	ME44	FALSE	FALSE	13.1807	8.38154	4.79912	3.58242	43.35	8.19495	35.1551	-26.9601	0.39031	-0.00879302	-0.0739531	SAP8_ORYSI	Zinc finger A20 and AN1 domain-containing stress-associated protein 8 (OsSAP8) (Stress-associated protein 3)			DNA binding [GO:0003677]; zinc ion binding [GO:0008270]	FALSE	FALSE	0	0	0	0
cluster10995_1rr.inclade1.ortho3.tre	ME8	ME4	FALSE	FALSE	15.047	5.1409	9.90611	-4.76522	29.4701	12.288	17.1821	-4.8941	0.50338	0.022825	-0.0546778	Y3720_ARATH	UPF0481 protein At3g47200		integral component of membrane [GO:0016021]; plasma membrane [GO:0005886]		FALSE	FALSE	0	0	0	0
cluster10996_1rr.inclade1.ortho1.tre	ME59	ME50	TRUE	FALSE	40.8746	4.04653	36.828	-32.7815	36.2919	8.81428	27.4776	-18.6633	0.13542	0.29271	0.109457	RFS2_ARATH	Probable galactinol--sucrose galactosyltransferase 2 (EC 2.4.1.82) (Protein SEED IMBIBITION 2) (Raffinose synthase 2)	raffinose catabolic process [GO:0034484]; response to karrikin [GO:0080167]; response to oxidative stress [GO:0006979]	plasmodesma [GO:0009506]	raffinose alpha-galactosidase activity [GO:0052692]; transferase activity, transferring glycosyl groups [GO:0016757]	FALSE	FALSE	HUMMINGBIRD	HUMMINGBIRD	HUMMINGBIRD	HUMMINGBIRD
cluster10998_1rr.inclade1.ortho3.tre	ME16	ME12	FALSE	FALSE	15.8948	4.18432	11.7105	-7.5262	5.39418	0.57059	4.82359	-4.253	0.54017	0.137387	0.0174994	NA	NA	NA	NA	NA	FALSE	FALSE	BUTTERFLY	BUTTERFLY	BUTTERFLY	BUTTERFLY
cluster10999_1rr.inclade1.ortho2.tre	ME7	ME7	TRUE	FALSE	82.0054	34.9732	47.0323	-12.0591	74.5229	29.5184	45.0045	-15.4861	0.05335	0.242614	0.122003	EBP1_SOLTU	ERBB-3 BINDING PROTEIN 1 (StEBP1)	auxin-activated signaling pathway [GO:0009734]; cell cycle G1/S phase transition [GO:0044843]; multicellular organism development [GO:0007275]; regulation of cell division [GO:0051302]; regulation of cell growth [GO:0001558]; rRNA processing [GO:0006364]	nucleus [GO:0005634]	RNA binding [GO:0003723]	FALSE	FALSE	0	0	0	0
cluster11000_2rr.inclade1.ortho1.tre	ME34	ME18	FALSE	FALSE	3.4128	0.298102	3.11469	-2.81659	15.3815	3.31798	12.0635	-8.74557	0.10769	0.0793141	-0.0660329	GT121_ARATH	Putative glutamine amidotransferase GAT1_2.1 (EC 2.4.2.-) (Class I glutamine amidotransferase) (GAT1_2 domain-containing protein 1)	glutamine metabolic process [GO:0006541]; regulation of secondary shoot formation [GO:2000032]		hydrolase activity [GO:0016787]; transferase activity [GO:0016740]	FALSE	FALSE	HUMMINGBIRD	HUMMINGBIRD	HUMMINGBIRD	HUMMINGBIRD
cluster11002_1rr.inclade1.ortho2.tre	ME17	ME0	FALSE	FALSE	3.97821	0.533229	3.44498	-2.91175	4.83593	0.840038	3.99589	-3.15585	0.56925	0.0186266	0.00425006	ERF34_ARATH	Ethylene-responsive transcription factor ERF034	ethylene-activated signaling pathway [GO:0009873]; transcription, DNA-templated [GO:0006351]	nucleus [GO:0005634]	DNA-binding transcription factor activity [GO:0003700]; transcription regulatory region DNA binding [GO:0044212]	FALSE	FALSE	0	0	0	0
cluster11002_2rr.inclade1.ortho1.tre	ME13	ME0	FALSE	FALSE	17.4597	6.07801	11.3817	-5.30368	3.78761	0.20373	3.58388	-3.38015	0.38712	0.0636123	0.0131614	ERF34_ARATH	Ethylene-responsive transcription factor ERF034	ethylene-activated signaling pathway [GO:0009873]; transcription, DNA-templated [GO:0006351]	nucleus [GO:0005634]	DNA-binding transcription factor activity [GO:0003700]; transcription regulatory region DNA binding [GO:0044212]	FALSE	TRUE	HUMMINGBIRD	0	HUMMINGBIRD	0
cluster11003_1rr.inclade1.ortho3.tre	ME9	ME26	FALSE	FALSE	8.97944	2.33843	6.64102	-4.30259	26.6067	7.07999	19.5267	-12.4467	0.34866	0.0561554	0.0444896	NA	NA	NA	NA	NA	FALSE	FALSE	HUMMINGBIRD	0	HUMMINGBIRD	HUMMINGBIRD
cluster11004_1rr.inclade1.ortho1.tre	ME4	ME36	FALSE	FALSE	6.60278	1.22774	5.37505	-4.14731	5.32807	0.811622	4.51645	-3.70483	0.14267	0.0709643	0.0279889	EBFC2_ARATH	Nucleoid-associated protein At2g24020, chloroplastic (Suppressor of tic40 protein 2)	protein import into chloroplast stroma [GO:0045037]	chloroplast [GO:0009507]; chloroplast envelope [GO:0009941]; chloroplast stroma [GO:0009570]; chloroplast thylakoid membrane [GO:0009535]	DNA binding [GO:0003677]	FALSE	FALSE	0	0	0	0
cluster11006_1rr.inclade1.ortho2.tre	ME12	ME0	FALSE	FALSE	6.21493	2.73575	3.47918	-0.743423	3.05552	0.404765	2.65075	-2.24599	0.37484	0.00315304	0.0129609	GLOX_VITPS	Aldehyde oxidase GLOX (EC 1.2.3.1) (Glyoxal oxidase) (VpGLOX)	defense response to fungus [GO:0050832]	cell wall [GO:0005618]; extracellular space [GO:0005615]	aldehyde oxidase activity [GO:0004031]; geranial:oxygen oxidoreductase activity [GO:0102797]; heptaldehyde:oxygen oxidoreductase activity [GO:0102798]	FALSE	TRUE	0	0	0	0
cluster11007_1rr.inclade1.ortho3.tre	ME42	ME0	FALSE	FALSE	1.87669	0.198618	1.67807	-1.47945	2.28259	0.592383	1.6902	-1.09782	0.16854	0.0335281	-0.104062	GSXL9_ARATH	Flavin-containing monooxygenase FMO GS-OX-like 9 (EC 1.8.-.-) (Flavin-monooxygenase glucosinolate S-oxygenase-like 9)	oxidation-reduction process [GO:0055114]		flavin adenine dinucleotide binding [GO:0050660]; monooxygenase activity [GO:0004497]; N,N-dimethylaniline monooxygenase activity [GO:0004499]; NADP binding [GO:0050661]	TRUE	TRUE	HUMMINGBIRD	0	HUMMINGBIRD	0
cluster11008_1rr.inclade1.ortho2.tre	ME59	ME22	FALSE	TRUE	19.2536	1.91602	17.3375	-15.4215	15.8854	2.87758	13.0079	-10.1303	0.22962	0.024185	0.0235116	NA	NA	NA	NA	NA	FALSE	FALSE	HUMMINGBIRD	HUMMINGBIRD	HUMMINGBIRD	HUMMINGBIRD
cluster11010_1rr.inclade1.ortho1.tre	ME27	ME2	TRUE	FALSE	38.0279	19.7021	18.3258	1.37622	59.4548	43.5992	15.8556	27.7437	0.08006	-0.0701034	-0.0167181	MUB4_ARATH	Membrane-anchored ubiquitin-fold protein 4 (AtMUB4) (Membrane-anchored ub-fold protein 4)		plasma membrane [GO:0005886]		FALSE	FALSE	BEE	0	BEE	BEE
cluster11011_1rr.inclade1.ortho3.tre	ME4	ME33	FALSE	FALSE	55.8526	19.0221	36.8304	-17.8083	7.97278	0.687892	7.28489	-6.597	0.29643	0.0623097	-0.00448842	CCAMK_PEA	Calcium and calcium/calmodulin-dependent serine/threonine-protein kinase (EC 2.7.11.17) (Ps-SYM9) (PsCCaMK) (Fragment)	nodulation [GO:0009877]	integral component of membrane [GO:0016021]	ATP binding [GO:0005524]; calcium ion binding [GO:0005509]; calmodulin binding [GO:0005516]; calmodulin-dependent protein kinase activity [GO:0004683]	FALSE	FALSE	0	0	0	0
cluster11012_1rr.inclade1.ortho1.tre	ME14	ME11	FALSE	FALSE	2.16221	0.435724	1.72649	-1.29076	10.1495	2.6237	7.52582	-4.90211	0.34526	-0.000106682	0.024063	NA	NA	NA	NA	NA	TRUE	FALSE	HUMMINGBIRD	HUMMINGBIRD	HUMMINGBIRD	HUMMINGBIRD
cluster11013_1rr.inclade1.ortho2.tre	ME5	ME18	FALSE	FALSE	18.559	9.13667	9.4223	-0.285628	21.8317	4.30802	17.5237	-13.2157	0.26161	0.0905589	0.0315935	NA	NA	NA	NA	NA	FALSE	FALSE	HUMMINGBIRD	HUMMINGBIRD	HUMMINGBIRD	HUMMINGBIRD
cluster11014_1rr.inclade1.ortho1.tre	ME13	ME18	FALSE	FALSE	13.7728	3.80721	9.96561	-6.15841	27.8613	5.41593	22.4453	-17.0294	0.33867	0.0885397	0.067169	M3K17_ARATH	Mitogen-activated protein kinase kinase kinase 17 (EC 2.7.11.25)	abscisic acid-activated signaling pathway [GO:0009738]; activation of protein kinase activity [GO:0032147]; regulation of mitotic cell cycle [GO:0007346]; response to abscisic acid [GO:0009737]; response to osmotic stress [GO:0006970]; signal transduction by protein phosphorylation [GO:0023014]; stress-activated protein kinase signaling cascade [GO:0031098]	cytoplasm [GO:0005737]; nucleus [GO:0005634]	ATP binding [GO:0005524]; MAP kinase kinase kinase activity [GO:0004709]; protein serine/threonine kinase activity [GO:0004674]	FALSE	FALSE	HUMMINGBIRD	HUMMINGBIRD	HUMMINGBIRD	HUMMINGBIRD
cluster11014_2rr.inclade1.ortho2.tre	ME12	ME20	FALSE	FALSE	4.67922	2.03813	2.64109	-0.602954	6.74415	1.10927	5.63488	-4.52561	0.26295	0.0164625	-0.0301963	M3K17_ARATH	Mitogen-activated protein kinase kinase kinase 17 (EC 2.7.11.25)	abscisic acid-activated signaling pathway [GO:0009738]; activation of protein kinase activity [GO:0032147]; regulation of mitotic cell cycle [GO:0007346]; response to abscisic acid [GO:0009737]; response to osmotic stress [GO:0006970]; signal transduction by protein phosphorylation [GO:0023014]; stress-activated protein kinase signaling cascade [GO:0031098]	cytoplasm [GO:0005737]; nucleus [GO:0005634]	ATP binding [GO:0005524]; MAP kinase kinase kinase activity [GO:0004709]; protein serine/threonine kinase activity [GO:0004674]	FALSE	FALSE	0	0	0	0
cluster11016_1rr.inclade1.ortho1.tre	ME0	ME11	FALSE	FALSE	1.54681	0.481856	1.06496	-0.583102	6.38691	1.30922	5.07769	-3.76846	0.29977	0.0197962	-0.0219545	PYM_ARATH	Protein POLYCHOME (Protein UV-B-INSENSITIVE 4)	cell division [GO:0051301]; defense response [GO:0006952]; DNA endoreduplication [GO:0042023]; endosperm development [GO:0009960]; megagametogenesis [GO:0009561]; negative regulation of ubiquitin protein ligase activity [GO:1904667]; positive regulation of defense response to bacterium [GO:1900426]; regulation of nuclear division [GO:0051783]; response to UV-B [GO:0010224]; trichome branching [GO…	nucleus [GO:0005634]		TRUE	FALSE	0	HUMMINGBIRD	0	HUMMINGBIRD
cluster11018_1rr.inclade1.ortho1.tre	ME39	ME49	FALSE	FALSE	11.3135	2.43529	8.87817	-6.44288	24.8002	5.52583	19.2743	-13.7485	0.30422	-0.0806939	0.0144739	PHR2_ARATH	Blue-light photoreceptor PHR2	protein-chromophore linkage [GO:0018298]		photoreceptor activity [GO:0009881]	FALSE	FALSE	0	0	BUTTERFLY	0
cluster11020_2rr.inclade1.ortho1.tre	ME18	ME0	FALSE	FALSE	3.77961	0.300848	3.47876	-3.17791	4.98022	1.05564	3.92458	-2.86895	0.43876	-0.0144038	-0.00542204	MARD1_ARATH	Protein MARD1 (Mediator of ABA-regulated dormancy1) (Senescence-associated protein SAG102)	response to abscisic acid [GO:0009737]; seed dormancy process [GO:0010162]	cytoplasmic stress granule [GO:0010494]; P-body [GO:0000932]	metal ion binding [GO:0046872]	FALSE	FALSE	BUTTERFLY	0	BUTTERFLY	0
cluster11021_1rr.inclade1.ortho4.tre	ME13	ME11	FALSE	FALSE	9.94222	3.61224	6.32998	-2.71773	24.9913	12.8294	12.162	0.667442	0.44075	0.00336195	-0.0141892	CAAT1_ARATH	Cationic amino acid transporter 1 (Amino acid transporter 1)	amino acid transport [GO:0006865]	integral component of membrane [GO:0016021]; membrane [GO:0016020]; plasma membrane [GO:0005886]	transmembrane transporter activity [GO:0022857]	FALSE	FALSE	HUMMINGBIRD	HUMMINGBIRD	HUMMINGBIRD	HUMMINGBIRD
cluster11022_1rr.inclade1.ortho3.tre	ME42	ME14	FALSE	FALSE	7.13399	0.875845	6.25814	-5.3823	12.5747	3.5328	9.0419	-5.5091	0.16649	0.0697098	-0.0231186	TIC32_ARATH	Short-chain dehydrogenase TIC 32, chloroplastic (EC 1.1.1.-) (Translocon at the inner envelope membrane of chloroplasts 32) (AtTIC32)	protein transport [GO:0015031]	chloroplast [GO:0009507]; chloroplast envelope [GO:0009941]; chloroplast inner membrane [GO:0009706]; plasma membrane [GO:0005886]	oxidoreductase activity [GO:0016491]	FALSE	FALSE	HUMMINGBIRD	HUMMINGBIRD	HUMMINGBIRD	HUMMINGBIRD
cluster11023_1rr.inclade1.ortho5.tre	ME20	ME6	FALSE	FALSE	6.22571	1.45768	4.76803	-3.31035	9.17677	2.35863	6.81814	-4.4595	0.33736	-0.0158792	-0.047018	PDI_RICCO	Protein disulfide-isomerase (PDI) (EC 5.3.4.1)	cell redox homeostasis [GO:0045454]	endoplasmic reticulum lumen [GO:0005788]	protein disulfide isomerase activity [GO:0003756]	FALSE	FALSE	HUMMINGBIRD	HUMMINGBIRD	HUMMINGBIRD	HUMMINGBIRD
cluster11024_1rr.inclade1.ortho3.tre	ME10	ME3	FALSE	FALSE	28.5606	7.51558	21.0451	-13.5295	59.3574	23.6837	35.6736	-11.9899	0.30605	0.0672531	0.0517103	NA	NA	NA	NA	NA	FALSE	FALSE	0	0	0	BUTTERFLY
cluster11025_1rr.inclade1.ortho2.tre	ME40	ME12	TRUE	FALSE	23.5331	7.50409	16.0291	-8.52496	22.6817	6.8621	15.8196	-8.95747	0.2113	-0.0549983	-0.04435	PUB8_ARATH	U-box domain-containing protein 8 (EC 2.3.2.27) (Plant U-box protein 8) (RING-type E3 ubiquitin transferase PUB8)	protein ubiquitination [GO:0016567]	cytoplasm [GO:0005737]; nucleus [GO:0005634]	ubiquitin-protein transferase activity [GO:0004842]	FALSE	FALSE	BUTTERFLY	BUTTERFLY	BUTTERFLY	BUTTERFLY
cluster11028_1rr.inclade1.ortho3.tre	ME12	ME9	FALSE	FALSE	9.34284	4.0854	5.25744	-1.17203	10.6022	2.56731	8.03488	-5.46757	0.18927	0.0475355	-0.0300372	PIN1_DIGLA	Peptidyl-prolyl cis-trans isomerase Pin1 (PPIase Pin1) (EC 5.2.1.8) (DlPar13) (Rotamase Pin1)		cytoplasm [GO:0005737]; nucleus [GO:0005634]	peptidyl-prolyl cis-trans isomerase activity [GO:0003755]	FALSE	FALSE	0	0	0	0
cluster11030_1rr.inclade1.ortho1.tre	ME11	ME39	TRUE	FALSE	28.5304	13.4911	15.0394	-1.54833	34.5455	6.23941	28.3061	-22.0667	0.10159	0.0434411	0.0326005	RS8_ORYSJ	40S ribosomal protein S8	maturation of SSU-rRNA from tricistronic rRNA transcript (SSU-rRNA, 5.8S rRNA, LSU-rRNA) [GO:0000462]; translation [GO:0006412]	cytosolic small ribosomal subunit [GO:0022627]	structural constituent of ribosome [GO:0003735]	FALSE	FALSE	0	0	0	0
cluster11032_1rr.inclade1.ortho2.tre	ME2	ME1	FALSE	FALSE	5.96058	1.54007	4.42051	-2.88045	5.13452	1.74349	3.39103	-1.64755	0.19018	-0.024805	-0.00205277	AB17I_ARATH	ABC transporter I family member 17 (ABC transporter ABCI.17) (AtABCI17) (MRP-related protein 1) (Non-intrinsic ABC protein 3)	phosphate ion transmembrane transport [GO:0035435]	plasma membrane [GO:0005886]; vacuolar membrane [GO:0005774]	ATPase activity [GO:0016887]; ATP binding [GO:0005524]; inorganic phosphate transmembrane transporter activity [GO:0005315]; transporter activity [GO:0005215]	FALSE	FALSE	0	0	0	0
cluster11035_1rr.inclade1.ortho2.tre	ME1	ME1	FALSE	FALSE	5.92433	2.41908	3.50526	-1.08618	79.8923	48.1131	31.7792	16.3339	0.11099	-0.00760922	-0.00591644	NA	NA	NA	NA	NA	FALSE	FALSE	0	0	0	0
cluster11036_1rr.inclade1.ortho1.tre	ME19	ME32	FALSE	FALSE	7.42663	2.20216	5.22448	-3.02232	14.5579	4.61498	9.94289	-5.32791	0.2443	0.0351648	0.092735	FTHS_SPIOL	Formate--tetrahydrofolate ligase (EC 6.3.4.3) (10-formyletrahydrofolate synthetase) (FHS) (FTHFS) (Formyltetrahydrofolate synthetase)	tetrahydrofolate interconversion [GO:0035999]		ATP binding [GO:0005524]; formate-tetrahydrofolate ligase activity [GO:0004329]	FALSE	FALSE	0	BUTTERFLY	0	BUTTERFLY
cluster11037_1rr.inclade1.ortho3.tre	ME27	ME58	FALSE	FALSE	6.03135	0.904679	5.12667	-4.22199	19.2201	1.27258	17.9475	-16.6749	0.20704	-0.0486337	0.0536309	PPDEX_ARATH	DeSI-like protein At4g17486 (EC 3.4.-.-)			peptidase activity [GO:0008233]	FALSE	FALSE	BEE	0	BEE	0
cluster11041_1rr.inclade1.ortho1.tre	ME7	ME6	FALSE	FALSE	39.4958	12.6178	26.878	-14.2602	3.18622	0.776583	2.40964	-1.63305	0.1675	0.0397704	-0.0614584	DJ1D_ARATH	Protein DJ-1 homolog D (AtDJ1D) (Lactoylglutathione lyase DJ1D) (EC 4.4.1.5)			glyoxalase III activity [GO:0019172]; lactoylglutathione lyase activity [GO:0004462]	FALSE	TRUE	0	HUMMINGBIRD	0	HUMMINGBIRD
cluster11042_1rr.inclade1.ortho3.tre	ME18	ME9	FALSE	TRUE	18.1269	6.08517	12.0417	-5.95652	9.24626	3.41752	5.82874	-2.41123	0.2934	-0.0216281	-0.0338252	CYP40_ARATH	Peptidyl-prolyl cis-trans isomerase CYP40 (PPIase CYP40) (EC 5.2.1.8) (Cyclophilin of 40 kDa) (Cyclophilin-40) (Protein SQUINT) (Rotamase CYP40)	floral meristem determinacy [GO:0010582]; protein folding [GO:0006457]; vegetative phase change [GO:0010050]	cytoplasm [GO:0005737]; cytosol [GO:0005829]	peptidyl-prolyl cis-trans isomerase activity [GO:0003755]	FALSE	FALSE	BUTTERFLY	0	BUTTERFLY	0
cluster11043_2rr.inclade1.ortho3.tre	ME4	ME3	FALSE	FALSE	17.9619	6.70402	11.2579	-4.55391	10.2322	3.20872	7.0235	-3.81478	0.44539	0.0471816	0.0568861	TGT3B_ARATH	Trihelix transcription factor GT-3b (Transcription factor GT-1-like) (Trihelix DNA-binding protein GT-3b)	regulation of transcription, DNA-templated [GO:0006355]; transcription, DNA-templated [GO:0006351]	mediator complex [GO:0016592]; nucleolus [GO:0005730]; nucleus [GO:0005634]	DNA-binding transcription factor activity [GO:0003700]; RNA polymerase II transcription factor activity, sequence-specific DNA binding [GO:0000981]; sequence-specific DNA binding [GO:0043565]	FALSE	FALSE	0	0	0	BUTTERFLY
cluster11044_1rr.inclade1.ortho1.tre	ME19	ME4	FALSE	FALSE	7.00461	1.49695	5.50765	-4.0107	22.4265	4.49618	17.9304	-13.4342	0.06712	0.076457	0.0960741	FBK22_ARATH	F-box/kelch-repeat protein At1g55270	protein ubiquitination [GO:0016567]	Cul3-RING ubiquitin ligase complex [GO:0031463]		FALSE	FALSE	0	0	0	0
cluster11045_1rr.inclade1.ortho1.tre	ME15	ME3	FALSE	FALSE	9.46685	2.20728	7.25957	-5.05229	68.0319	37.0766	30.9553	6.12132	0.18437	0.0109904	0.0369612	NA	NA	NA	NA	NA	FALSE	FALSE	0	0	0	BUTTERFLY
cluster11046_1rr.inclade1.ortho1.tre	ME13	ME0	FALSE	FALSE	3.93735	1.43828	2.49907	-1.06079	2.75735	0.371127	2.38622	-2.01509	0.22262	0.025124	-0.0584616	NA	NA	NA	NA	NA	FALSE	TRUE	HUMMINGBIRD	0	HUMMINGBIRD	0
cluster11047_1rr.inclade1.ortho2.tre	ME13	ME11	FALSE	FALSE	17.8595	8.53896	9.32056	-0.7816	17.4622	4.33908	13.1231	-8.784	0.50217	0.0404064	0.0392062	TRXY1_ARATH	Thioredoxin Y1, chloroplastic (AtTrxy1)	cell redox homeostasis [GO:0045454]; cellular response to oxidative stress [GO:0034599]; glycerol ether metabolic process [GO:0006662]; positive regulation of catalytic activity [GO:0043085]	chloroplast [GO:0009507]; chloroplast stroma [GO:0009570]	enzyme activator activity [GO:0008047]; oxidoreductase activity, acting on a sulfur group of donors, disulfide as acceptor [GO:0016671]; protein disulfide oxidoreductase activity [GO:0015035]; protein-disulfide reductase activity [GO:0047134]; thioredoxin-disulfide reductase activity [GO:0004791]	FALSE	FALSE	HUMMINGBIRD	HUMMINGBIRD	HUMMINGBIRD	HUMMINGBIRD
cluster11048_1rr.inclade1.ortho1.tre	ME2	ME9	FALSE	FALSE	10.5762	6.84812	3.72806	3.12006	21.9329	8.18107	13.7519	-5.57079	0.35122	-0.0224585	-0.0214254	ATL4_ARATH	E3 ubiquitin-protein ligase ATL4 (EC 2.3.2.27) (Protein ARABIDOPSIS TOXICOS EN LEVADURA 4) (Protein ATL4) (RING-H2 finger X1a) (RING-H2 zinc finger protein ATL4) (RING-H2 zinc finger protein RHX1a) (RING-type E3 ubiquitin transferase ATL4)	proteasome-mediated ubiquitin-dependent protein catabolic process [GO:0043161]; protein ubiquitination [GO:0016567]	integral component of membrane [GO:0016021]	metal ion binding [GO:0046872]; ubiquitin protein ligase activity [GO:0061630]; ubiquitin-protein transferase activity [GO:0004842]	FALSE	FALSE	0	0	0	0
cluster11048_1rr.inclade2.ortho1.tre	ME1	ME9	FALSE	FALSE	1.40971	0.447771	0.961935	-0.514164	9.85069	2.7605	7.09018	-4.32968	0.2168	-0.0208584	-0.102204	ATL4_ARATH	E3 ubiquitin-protein ligase ATL4 (EC 2.3.2.27) (Protein ARABIDOPSIS TOXICOS EN LEVADURA 4) (Protein ATL4) (RING-H2 finger X1a) (RING-H2 zinc finger protein ATL4) (RING-H2 zinc finger protein RHX1a) (RING-type E3 ubiquitin transferase ATL4)	proteasome-mediated ubiquitin-dependent protein catabolic process [GO:0043161]; protein ubiquitination [GO:0016567]	integral component of membrane [GO:0016021]	metal ion binding [GO:0046872]; ubiquitin protein ligase activity [GO:0061630]; ubiquitin-protein transferase activity [GO:0004842]	TRUE	FALSE	0	0	0	0
cluster11049_1rr.inclade1.ortho1.tre	ME5	ME14	FALSE	FALSE	13.0777	6.10254	6.97518	-0.872639	35.4483	21.299	14.1493	7.14972	0.16857	0.0177291	0.0329558	MIZ1_ARATH	Protein MIZU-KUSSEI 1	chloroplast organization [GO:0009658]; hydrotropism [GO:0010274]	cortical endoplasmic reticulum [GO:0032541]; cytoplasm [GO:0005737]; endoplasmic reticulum [GO:0005783]; endoplasmic reticulum membrane [GO:0005789]; membrane [GO:0016020]		FALSE	FALSE	HUMMINGBIRD	HUMMINGBIRD	HUMMINGBIRD	HUMMINGBIRD
cluster11049_2rr.inclade1.ortho1.tre	ME4	ME0	TRUE	FALSE	75.4872	26.7142	48.773	-22.0588	2.95763	0.290403	2.66723	-2.37683	0.07794	0.0788828	0.00536286	MIZ1_ARATH	Protein MIZU-KUSSEI 1	chloroplast organization [GO:0009658]; hydrotropism [GO:0010274]	cortical endoplasmic reticulum [GO:0032541]; cytoplasm [GO:0005737]; endoplasmic reticulum [GO:0005783]; endoplasmic reticulum membrane [GO:0005789]; membrane [GO:0016020]		FALSE	TRUE	0	0	0	0
cluster11050_1rr.inclade1.ortho3.tre	ME29	ME11	FALSE	TRUE	6.39356	1.40129	4.99228	-3.59099	6.61965	1.75188	4.86777	-3.11589	0.57577	0.0685617	-0.0191841	NA	NA	NA	NA	NA	FALSE	FALSE	0	HUMMINGBIRD	HUMMINGBIRD	HUMMINGBIRD
cluster11051_1rr.inclade1.ortho1.tre	ME7	ME3	FALSE	FALSE	5.08999	0.996457	4.09353	-3.09707	16.5239	7.06565	9.45827	-2.39262	0.32507	0.0197319	-0.0582147	R1A6_SOLDE	Putative late blight resistance protein homolog R1A-6	plant-type hypersensitive response [GO:0009626]	cytoplasm [GO:0005737]; membrane [GO:0016020]	ADP binding [GO:0043531]; ATP binding [GO:0005524]	FALSE	FALSE	0	0	0	BUTTERFLY
cluster11052_1rr.inclade1.ortho3.tre	ME35	ME6	FALSE	FALSE	22.0041	3.13923	18.8649	-15.7257	35.9341	9.64621	26.2879	-16.6417	0.19615	-0.0439737	-0.0852087	AGLU_SPIOL	Alpha-glucosidase (EC 3.2.1.20) (Maltase)			alpha-1,4-glucosidase activity [GO:0004558]; carbohydrate binding [GO:0030246]; maltose alpha-glucosidase activity [GO:0032450]	FALSE	FALSE	0	HUMMINGBIRD	0	HUMMINGBIRD
cluster11053_1rr.inclade1.ortho3.tre	ME1	ME2	FALSE	FALSE	32.0218	20.7781	11.2438	9.53431	63.2861	26.5806	36.7056	-10.125	0.24434	-0.0126008	-0.0456468	NA	NA	NA	NA	NA	FALSE	FALSE	0	0	0	BEE
[truncated: 8,657 more rows]

## Sheet: 3. Bud module enrichment
ME61	GO.ID	Term	Annotated	Significant	Expected	Rank in weight01	P
1	GO:0051592	response to calcium ion	7	1	0.01	1	0.012
[truncated: 1,126 more rows]

## Sheet: 4. D module enrichment
ME61	GO.ID	Term	Annotated	Significant	Expected	Rank in weight01	P
[truncated: 1,102 more rows]

[truncated: 5 more sheets: 5. Module preservation, 6. List of Hubs, 7. Table of Periphery, 8. Traits module enrichment, 9. Evolutionary rates]
